# Supplementary material for: Selective Inhibition of HDAC3 Targets Synthetic Vulnerabilities and Activates Immune Surveillance in Lymphoma
Source: Oxford University Press journal article supplement (doi:10.1158/2159-8290.cd-19-0116), 2020-01-08
Supplement: 21598290cd190116-sup-216241_2_supp_5996396_q3hs0z.xlsx [file 21598290cd190116-sup-216241_2_supp_5996396_q3hs0z.xlsx]

## Sheet: Contents
Supplementary Tables
Table S1: Differential H3K27Ac in CREBBP-WT vs CREBBP-R1446C
Table S2: Differentially expressed genes in CREBBP-WT vs CREBBP-R1446C
Table S3: Hypergeometric gene set enrichment analysis of differential H3K27Ac between WT and R1446C CRISPR cells
Table S4: Hypergeometric gene set enrichment analysis of differentially expressed genes between WT and R1446C CRISPR cells
Table S5: Comparison of clinical factors between CREBBP LOP and KAT mutation groups
Table S6: Changes in gene expression in R1446C cells induced by BRD3308
Table S7: Hypergeometric gene set enrichment analysis of differential gene expression induced by BRD3308 in R1446C cells
Table S8: Hypergeometric gene set enrichment analysis of H3K27Ac changes induced by BRD3308 in R1446C cells
Table S9: Changes in gene expression in WT cells induced by BRD3308
Table S10: Hypergeometric gene set enrichment analysis of differential gene expression induced by BRD3308 in WT cells
Table S11: Differentially expressed genes in BRD3308 vs vehicle treated DLBCL cell lines
Table S12: Hypergeometric gene set enrichment analysis of differentially expressed genes induced by BRD3308 in DLBCL cell lines
Table S13: Primer sequences

## Sheet: Table S1
Table S1: Differential H3K27Ac in CREBBP-WT vs CREBBP-R1446C
				Normalized FPKM						WT vs R1446C
Direction	Chr.	Start	End	WT-gRNA1	WT-gRNA2	KO-gRNA1	KO-gRNA2	R1446C-gRNA1	R1446C-gRNA1	Fold Change	Q-value
Gain	chr16	31415450	31416140	0.151904	0.31351	0.38995	0.349345	3.66832	3.1285	4.03683	6.57743e-12
Gain	chr16	58497043	58497867	0.508926	0.262588	1.17581	1.66784	3.28009	2.95166	2.93099	5.25758e-08
Gain	chr16	58375352	58384145	2.10374	1.64127	1.39109	1.19134	7.44367	11.017	2.1796	2.92424e-07
Gain	chr16	67198250	67199127	0.836858	0.86358	1.35035	1.48468	4.68166	4.10363	2.27818	1.11476e-06
Gain	chr16	49889630	49889931	0.608246	0.448334	0.98146	1.91839	4.1967	3.62027	3.08925	1.14468e-06
Gain	chr16	77017663	77018479	0.256955	0.596609	0.857508	0.472749	2.26404	2.73725	2.57737	1.65855e-06
Gain	chr16	73066025	73072644	1.43892	2.18435	1.03386	1.91805	6.58176	7.47698	1.84362	1.2422e-05
Gain	chr16	78598305	78598668	0.576736	0.37197	1.18442	0.596862	3.76419	2.25272	2.75297	3.33838e-05
Gain	chr16	9141312	9142396	0.701385	0.698823	0.769873	0.867696	2.80979	2.9085	1.94893	3.59405e-05
Gain	chr16	58370121	58374783	1.09738	0.783984	0.861009	0.900776	2.74004	4.6254	1.84102	8.98012e-05
Gain	chr16	30951021	30952197	0.891809	0.736228	1.14467	0.902421	3.0267	2.68116	1.72793	0.000340454
Gain	chr16	73080133	73093399	2.6643	3.53316	2.12242	4.10851	8.28792	10.4809	1.48707	0.000376433
Gain	chr16	53752284	53753512	0.811372	0.506775	0.570044	0.805313	2.67567	2.28466	1.76991	0.000390058
Gain	chr16	73076789	73079506	0.975125	1.37489	0.624566	0.710515	3.46574	3.54713	1.49815	0.000735763
Gain	chr16	85557575	85559615	3.20144	2.61374	2.61402	5.40513	8.7943	8.1691	1.43036	0.000914142
Gain	chr16	57843725	57845517	2.72221	2.32584	0.91672	0.982823	10.5265	6.16701	1.62112	0.00111855
Gain	chr16	88366510	88367335	0.98485	0.754027	0.293596	0.292249	3.48347	2.76759	1.72869	0.00171622
Gain	chr16	67203521	67205911	3.56691	5.70808	3.92181	3.65478	12.4639	13.8011	1.39997	0.00183222
Gain	chr16	88543788	88550009	4.18379	2.18481	0.905114	11.0961	11.9906	9.20126	1.61998	0.00184873
Gain	chr16	83985888	83987354	1.7709	2.04895	1.41432	0.724028	6.65469	4.47166	1.45299	0.00278001
Gain	chr16	77098883	77099825	0.640036	0.804054	0.942951	0.409582	2.61538	1.81816	1.57861	0.00381789
Gain	chr16	81174669	81175156	0.91415	1.38726	0.717812	1.13773	3.15868	3.56429	1.50987	0.00583194
Gain	chr16	67570924	67572890	2.98835	2.39543	1.43837	3.93943	7.22698	6.35416	1.23225	0.00703182
Gain	chr16	88618863	88619851	0.451067	1.1226	0.408679	0.805472	3.29034	1.88434	1.63232	0.00781663
Gain	chr16	5609644	5610923	0.738042	1.26935	1.41043	1.37672	2.16765	3.35839	1.37967	0.00999937
Gain	chr16	78228677	78230922	1.54224	1.21773	1.84756	5.53516	3.40101	3.41856	1.18535	0.0110447
Gain	chr16	10427625	10435234	2.05518	1.96068	1.75978	5.08172	4.96933	4.41455	1.11692	0.0111536
Gain	chr16	14469367	14470429	1.33306	1.22278	1.11534	0.953781	5.70365	2.22068	1.54823	0.0142886
Gain	chr16	89893677	89896333	4.43449	3.41423	1.76459	6.8776	8.77948	9.4642	1.10587	0.0150758
Gain	chr16	4165559	4166423	1.15281	0.626113	0.404962	4.80004	1.90081	3.04498	1.4009	0.0156215
Gain	chr16	67960099	67960527	0.795197	1.45181	1.19339	3.545	4.23186	2.66437	1.53578	0.0167525
Gain	chr16	50297857	50298668	1.03415	1.13387	1.69239	1.63508	3.29042	2.23389	1.30367	0.0178808
Gain	chr16	64164642	64167519	1.65035	1.82537	1.88188	2.57502	6.81988	2.89234	1.40394	0.0197104
Gain	chr16	70517093	70517526	1.51161	1.06071	1.05547	4.11599	3.5517	3.607	1.29409	0.0225734
Gain	chr16	56903129	56903550	1.30586	1.47589	0.893928	2.23092	3.40918	3.82733	1.27377	0.0234201
Gain	chr16	85514042	85514869	0.887393	1.60253	1.00883	1.80757	3.10273	2.97098	1.24689	0.0236201
Gain	chr16	81658392	81660021	1.89969	2.14309	1.80188	4.07266	6.87184	3.58241	1.25438	0.0250557
Gain	chr16	77022847	77023153	0.59834	1.76413	1.84318	0.550418	3.9052	2.75192	1.56193	0.0250565
Gain	chr16	4576470	4577554	2.56368	1.79697	1.58941	1.62415	5.36701	4.76352	1.12686	0.026826
Gain	chr16	10455283	10456901	2.15572	1.6726	1.73091	4.74147	3.76605	4.92666	1.0661	0.029303
Gain	chr16	58059319	58060371	2.41731	2.13446	3.81281	4.99759	7.05902	4.01158	1.19926	0.0297992
Gain	chr16	9022554	9024463	1.0579	0.949906	0.846457	3.41243	2.95913	1.88638	1.17357	0.0318183
Gain	chr16	64441941	64444306	1.40857	1.39632	2.34606	2.66292	3.96688	2.53103	1.10748	0.0349243
Gain	chr16	72965669	72966378	1.1088	1.02978	0.796981	0.747992	2.21928	2.7998	1.16893	0.0359709
Gain	chr16	11680253	11681244	1.90462	1.283	1.62977	5.91327	3.48757	3.85748	1.09483	0.0383639
Gain	chr16	63628918	63645338	2.14937	2.61048	3.02257	3.08123	10.405	3.17922	1.4361	0.0407407
Gain	chr16	23549951	23550675	1.30303	1.49404	1.18932	1.43174	3.26005	3.15315	1.09723	0.0409546
Gain	chr2	177625926	177630977	0.737587	0.664657	0.581367	0.453934	12.8962	9.12379	3.87675	2.81305e-18
Gain	chr2	6320656	6325940	0.417083	0.517506	0.729085	0.406516	6.73416	5.23763	3.58671	8.79452e-17
Gain	chr2	179277884	179280285	0.786589	0.552411	2.70353	4.01994	8.69901	7.33446	3.50298	3.29548e-15
Gain	chr2	177632415	177636731	0.735515	0.903274	0.605448	0.866727	14.9411	8.51297	3.75311	8.50222e-15
Gain	chr2	6315241	6320135	0.353818	0.641718	0.902772	0.438905	6.85783	4.99502	3.51207	2.24533e-13
Gain	chr2	177618206	177621591	0.496	0.303904	0.557055	0.278042	4.01621	3.0308	3.06197	1.11288e-10
Gain	chr2	104701455	104703766	0.715058	0.503639	0.571078	0.720434	7.86719	4.5032	3.2491	1.43307e-10
Gain	chr2	185135813	185136839	0.357722	0.395512	0.498506	0.376082	3.36871	3.02437	3.0828	6.92072e-10
Gain	chr2	203713078	203714654	0.249602	0.206058	0.205039	0.336763	1.73769	5.78268	4.00919	1.05001e-09
Gain	chr2	185221008	185223509	0.849545	0.476217	1.63698	0.646428	6.51678	4.63793	2.96971	1.99861e-09
Gain	chr2	6362599	6366445	1.07776	0.85877	0.882542	0.790644	5.66302	5.78736	2.4626	1.99861e-09
Gain	chr2	6381887	6386076	0.319407	0.542881	0.816727	0.501231	2.18278	5.3729	2.99333	4.37293e-08
Gain	chr2	177622565	177623603	0.353591	0.390944	0.414946	0.162635	3.59355	2.20022	2.97121	5.58784e-08
Gain	chr2	185227105	185231956	0.616556	0.351608	1.20511	0.532348	3.68522	2.5094	2.56809	2.04773e-07
Gain	chr2	183833417	183844820	1.18505	0.667249	1.71068	1.58758	4.2262	6.15104	2.357	7.1955e-07
Gain	chr2	10425415	10426119	0.446664	0.460926	0.496868	0.239685	3.69265	2.32621	2.74623	1.19181e-06
Gain	chr2	177631219	177631924	0.631877	0	0	0.273538	4.22112	3.06203	3.29063	1.40445e-06
Gain	chr2	185327027	185328782	0.552924	0.647685	1.90276	0.508639	5.9301	2.44803	2.76447	1.75878e-06
Gain	chr2	122704541	122707690	1.04133	0.722117	1.0265	4.34516	5.27405	3.66018	2.24586	1.85233e-06
Gain	chr2	172963589	172964762	1.20702	0.784242	0.711509	3.74228	5.42698	4.4659	2.20049	2.03093e-06
Gain	chr2	185288534	185291278	0.75522	0.33541	3.28844	1.82037	10.2825	2.75186	3.5134	2.60987e-06
Gain	chr2	183899214	183903867	2.06368	0.698223	2.95278	8.56354	8.46417	12.328	2.77609	2.72688e-06
Gain	chr2	157196185	157199522	0.534578	0.567872	1.21893	0.997989	1.89845	5.01728	2.52429	3.57073e-06
Gain	chr2	62272963	62284007	1.00737	0.929207	0.729445	0.611963	3.18506	4.94039	1.95329	3.68498e-06
Gain	chr2	185305820	185311954	3.37054	2.93084	14.1821	11.9302	15.5274	11.3002	1.98747	3.70292e-06
Gain	chr2	185203234	185203674	0.535541	0.429832	0.916515	0.273693	3.41765	2.92995	2.7695	3.75515e-06
Gain	chr2	161977764	161981748	1.56066	1.37266	1.59577	2.43518	5.31219	5.88001	1.81312	7.7291e-06
Gain	chr2	29356898	29359620	1.11789	0.845299	0.702583	0.65602	4.60412	3.64099	1.96261	1.17692e-05
Gain	chr2	6392721	6396450	0.492468	0.595311	0.772969	0.446553	1.70812	3.33752	2.13172	1.19869e-05
Gain	chr2	185378947	185379502	0.660757	0.389632	2.27777	0.95517	3.69649	2.458	2.53632	1.35155e-05
Gain	chr2	6447975	6452224	1.19167	2.61237	1.87034	2.31174	10.1715	8.14436	2.18179	1.61822e-05
Gain	chr2	63809423	63810397	0.780516	1.22204	0.884367	0.668485	4.1105	4.38348	2.01717	1.6811e-05
Gain	chr2	183821508	183823893	0.967834	0.590163	1.51329	1.26466	2.9574	3.64496	1.96316	2.61024e-05
Gain	chr2	87927952	87929815	1.09809	0.929765	1.06973	0.75113	3.96936	3.30598	1.91904	2.64646e-05
Gain	chr2	62291033	62295087	1.00307	0.747939	0.571472	0.285748	2.66937	5.1596	2.06762	2.65782e-05
Gain	chr2	101129634	101130671	1.26404	0.834818	1.55755	0.837217	4.98302	4.18924	2.01599	3.00831e-05
Gain	chr2	29363067	29365655	0.790589	0.763537	0.718132	0.428902	3.98243	2.3898	2.01207	3.63743e-05
Gain	chr2	55184085	55187661	0.909685	0.984155	1.04709	2.22029	2.9399	3.75814	1.71832	3.9137e-05
Gain	chr2	63274407	63274863	1.03358	0.414783	0.294809	1.21491	3.89763	3.64295	2.36395	4.20654e-05
Gain	chr2	145095920	145097997	1.32597	1.01645	3.55297	0.964196	4.13753	4.36458	1.74601	5.73527e-05
Gain	chr2	183805151	183809310	0.883127	0.338493	1.36023	0.824001	2.39614	4.86212	2.43161	5.79529e-05
Gain	chr2	88139694	88141646	0.967428	1.15084	1.75222	2.36083	4.92853	3.02809	2.06411	6.13294e-05
Gain	chr2	6243431	6244324	0.440293	0.636093	0.72337	0.405029	3.10356	1.94561	2.1827	6.33147e-05
Gain	chr2	6277027	6277743	0.548985	0.679818	1.20259	0.336677	3.86972	2.18331	2.24102	6.49671e-05
Gain	chr2	39651622	39652940	1.09422	0.759619	1.3483	0.58565	3.40204	3.61702	1.8459	7.1746e-05
Gain	chr2	62218277	62220712	1.35732	0.855958	0.895973	0.624304	3.9232	4.31477	1.79158	8.5494e-05
Gain	chr2	62221220	62223937	1.07167	1.11585	0.47586	0.550649	3.86903	3.50142	1.65858	9.42484e-05
Gain	chr2	185441903	185442563	0.714594	0.901281	1.71212	0.730401	3.99027	2.89457	2.00154	0.000128346
Gain	chr2	6665518	6666418	0.611622	0.87159	0.837376	0.37509	3.00342	2.86816	1.91084	0.000129946
Gain	chr2	146798478	146799237	0.310754	0.676985	0.354547	0.285865	2.92963	2.09248	2.22032	0.000130043
Gain	chr2	182882781	182886823	1.46688	1.81512	3.67894	1.14041	10.6584	4.4374	2.12085	0.000146661
Gain	chr2	185313309	185319328	1.09848	0.854666	5.56367	3.33626	8.64889	2.60452	2.44303	0.000175679
Gain	chr2	42106789	42107354	0.741809	0.861182	0.523677	2.21779	4.35742	2.80969	2.06977	0.00022344
Gain	chr2	185234623	185237608	1.52035	0.879673	2.86962	1.20456	4.84101	4.03596	1.76819	0.000270216
Gain	chr2	172116921	172118443	1.24057	1.1735	1.68078	1.01441	4.70067	3.49147	1.67896	0.000279274
Gain	chr2	182905910	182916658	0.761684	0.750736	1.291	0.478348	9.85974	1.71757	2.87525	0.000337981
Gain	chr2	29351703	29354572	1.34408	1.00015	1.11725	0.521486	6.09891	3.14282	1.90072	0.000342105
Gain	chr2	54966451	54968873	0.888073	0.771143	0.544916	0.956424	2.88396	2.51251	1.59866	0.000385179
Gain	chr2	104694594	104696710	0.409055	0.626779	0.496399	0.399098	3.04194	1.39676	2.06549	0.000387962
Gain	chr2	99509315	99510973	1.13887	0.767168	0.600956	1.65879	5.09992	2.62112	1.91692	0.000474902
Gain	chr2	99090460	99094304	1.39227	1.45081	0.47654	1.31843	5.54124	3.69653	1.60529	0.000486374
Gain	chr2	63807680	63809073	0.752984	0.951859	0.927824	0.709993	2.40811	3.42242	1.64632	0.000512244
Gain	chr2	6495001	6497049	0.614735	1.40089	1.42026	0.883593	4.79792	3.2379	1.92173	0.00052012
Gain	chr2	45664787	45672183	0.830135	0.779764	1.45711	0.959455	1.75508	5.61327	2.05341	0.000532106
Gain	chr2	89439298	89444120	1.44728	1.34751	0.910662	0.755775	8.2102	3.36427	1.96486	0.000553134
Gain	chr2	63772955	63773786	0.977748	1.04152	1.13353	0.812395	4.56996	2.71777	1.81205	0.000600479
Gain	chr2	55003156	55005437	1.6559	1.15105	0.991861	1.52328	4.33806	4.48618	1.54681	0.000607976
Gain	chr2	6477903	6490373	2.86382	5.32859	7.61632	5.57667	14.8926	12.3813	1.63924	0.00068604
Gain	chr2	97533539	97535049	0.798881	1.37996	2.44311	3.48277	2.72038	5.08146	1.75436	0.000722817
Gain	chr2	62288131	62290666	1.01406	0.672714	0.616263	0.361716	2.09361	3.84089	1.70579	0.000801931
Gain	chr2	99076003	99078159	1.37473	1.36841	0.674576	1.46607	4.3036	3.79001	1.45977	0.000872193
Gain	chr2	63770184	63771288	1.1399	0.661669	1.38995	1.26706	3.78191	2.76591	1.76692	0.000914142
Gain	chr2	42105966	42106526	1.07585	1.15848	0.528344	2.28058	4.76261	3.23336	1.78357	0.000960591
Gain	chr2	98017921	98019660	1.46289	1.64966	0.975615	2.98279	5.03969	4.25561	1.46953	0.000992984
Gain	chr2	33269500	33271200	1.20331	0.811905	0.697004	2.02939	2.9401	3.21376	1.56619	0.001177
Gain	chr2	62638594	62639498	1.30483	1.61579	1.19096	1.36036	5.56393	3.76155	1.61845	0.00122227
Gain	chr2	185189761	185191152	0.810621	0.291804	1.00659	0.381519	3.22363	1.76722	2.08533	0.00122702
Gain	chr2	88844478	88844851	1.19279	0.579239	1.2248	1.2909	4.0299	2.79044	1.99385	0.00122976
Gain	chr2	55016805	55017574	0.749757	0.879201	0.594902	0.783758	2.80261	2.58163	1.65875	0.00138684
Gain	chr2	45680253	45687125	0.901061	0.697374	1.42314	0.646256	1.46027	8.04412	2.41244	0.00146769
Gain	chr2	203734564	203737450	1.88153	2.2699	3.17336	3.3697	3.95103	14.0551	1.9824	0.00161249
Gain	chr2	39627787	39631625	1.14153	0.76886	1.48099	1.25761	2.17713	4.22011	1.61434	0.00186144
Gain	chr2	62152585	62154566	2.10514	2.19969	2.8006	1.87564	5.20207	6.48159	1.3364	0.00190644
Gain	chr2	203695976	203697195	0.666792	0.99883	0.861374	1.1872	1.82502	4.94927	1.85261	0.00221331
Gain	chr2	33294068	33294745	1.00631	0.599102	0.476912	3.06197	2.67768	2.5288	1.69605	0.00226228
Gain	chr2	74208002	74208978	1.42354	2.02333	2.45461	4.12624	6.10053	4.57797	1.50546	0.0023161
Gain	chr2	97977478	97977903	1.72479	0.826367	1.01204	1.35999	5.06575	3.49974	2.0215	0.0023507
Gain	chr2	172959049	172961269	3.45003	2.7433	1.38307	3.98887	7.60346	9.08452	1.31614	0.00270693
Gain	chr2	27238734	27239688	0.604516	0.935728	0.705381	0.581376	2.08036	2.67996	1.5431	0.0029485
Gain	chr2	172885476	172887992	2.2311	1.79669	2.82623	6.23394	8.2063	4.41285	1.5504	0.0032223
Gain	chr2	122527872	122532172	4.15495	2.20992	4.62353	5.06256	9.27833	9.94852	1.47467	0.0033998
Gain	chr2	172199987	172208790	2.08942	2.54677	2.28015	2.73642	6.12404	5.65604	1.23856	0.00363761
Gain	chr2	112077960	112080011	0.959119	1.01614	0.840407	0.399976	3.88948	2.50662	1.50129	0.00374894
Gain	chr2	183942833	183944191	2.93503	2.41104	5.43273	4.99137	6.47779	7.33195	1.28358	0.00398308
Gain	chr2	64055257	64055753	0.422398	1.03523	0.813246	0.777135	3.37717	2.24984	1.84519	0.00405339
Gain	chr2	62353236	62354797	1.44479	1.43892	0.897035	0.911809	3.64033	3.91335	1.28372	0.00455615
Gain	chr2	99079028	99083532	3.01733	1.65302	0.879244	2.36307	7.81648	6.06726	1.46719	0.00456653
Gain	chr2	89376455	89379291	2.01644	2.08083	2.50745	2.391	7.35311	4.26545	1.4078	0.00456653
Gain	chr2	183783722	183788308	2.48284	1.19841	2.40848	2.02612	5.41405	5.90463	1.49351	0.00476964
Gain	chr2	219168738	219171898	1.75995	1.43921	0.860962	4.49804	3.57604	4.86587	1.27473	0.00482304
Gain	chr2	146791602	146792432	0.726299	1.40122	1.00519	0.929569	2.55566	3.9171	1.53993	0.0050777
Gain	chr2	183751563	183753700	1.43604	0.924601	1.41155	0.767775	2.41926	4.85806	1.51486	0.00538643
Gain	chr2	79238987	79239350	0.72092	0.74394	1.99871	1.92322	2.91725	2.45751	1.77137	0.00543084
Gain	chr2	122044643	122045418	0.980674	0.872403	1.00699	0.933238	2.69266	2.62571	1.4451	0.00562957
Gain	chr2	122532897	122533798	0.989147	0.720516	1.82226	1.09726	3.37984	2.011	1.57118	0.005683
Gain	chr2	112425989	112430371	2.39484	1.75463	4.59851	0.572789	4.1577	7.49471	1.37458	0.00580516
Gain	chr2	38737017	38737384	0.641776	1.25095	1.24477	1.11515	3.53711	2.63337	1.728	0.00591948
Gain	chr2	143738607	143741049	2.39535	1.99521	2.13976	2.43077	5.56647	5.39072	1.22077	0.00606244
Gain	chr2	74729966	74730799	1.5103	0.909141	1.68006	4.94952	3.36791	3.60507	1.43046	0.00665358
Gain	chr2	111792353	111794992	1.45123	0.912904	3.31716	1.24356	6.85083	2.17422	1.85352	0.0072058
Gain	chr2	54949547	54954350	5.60445	5.77777	4.38062	7.92934	13.4407	13.5517	1.13214	0.00737079
Gain	chr2	62253687	62269057	4.15022	3.42302	2.53836	2.27562	8.5173	9.68644	1.15292	0.00781511
Gain	chr2	156534510	156537449	1.57984	0.930279	3.31779	2.76704	3.39046	3.47368	1.32985	0.00802543
Gain	chr2	104995344	104996011	2.59272	1.37829	4.51782	3.21622	4.92275	6.32364	1.39268	0.0086287
Gain	chr2	62250182	62251135	1.15529	0.766398	0.593141	0.657897	2.83656	2.55254	1.40825	0.00868822
Gain	chr2	62270052	62271744	0.992	1.61549	1.0027	0.641635	2.81236	4.24166	1.32232	0.00871921
Gain	chr2	90255419	90262424	2.68183	2.89501	1.71919	1.3231	7.51968	5.83787	1.17483	0.00913112
Gain	chr2	145795472	145796327	1.37952	1.32866	3.6515	0.394809	2.96122	4.38327	1.30321	0.0094122
Gain	chr2	33170739	33177604	4.31498	2.27962	2.5156	12.6605	8.59597	9.4565	1.33472	0.00984329
Gain	chr2	99722812	99724900	2.035	1.8148	1.66394	0.79734	7.39522	3.60412	1.4391	0.0102216
Gain	chr2	113539655	113540346	1.02387	0.860906	1.75224	0.732565	3.21751	2.33401	1.41705	0.0105975
Gain	chr2	70780871	70781329	1.14342	1.06194	1.05669	2.57701	3.58213	3.08572	1.44059	0.0116817
Gain	chr2	145976612	145979959	1.39516	2.10294	4.40239	2.45147	3.81625	4.83159	1.18428	0.0118422
Gain	chr2	172949534	172951313	4.93871	5.24854	3.22438	11.2426	11.2962	12.1589	1.09277	0.0118562
Gain	chr2	63276920	63278923	3.79742	3.54032	4.43714	5.72175	8.95667	8.10914	1.11696	0.01254
Gain	chr2	146391132	146391948	1.25265	1.19322	2.20973	1.77281	5.07314	2.25063	1.53522	0.0128609
Gain	chr2	62236765	62238648	1.53215	1.19299	1.11558	0.730343	3.19996	3.31045	1.1784	0.0137063
Gain	chr2	38838503	38841531	3.50002	1.51087	0.907377	3.5863	9.21662	5.9803	1.49558	0.0140881
Gain	chr2	89231520	89233199	1.35893	0.98324	0.641561	1.60932	4.46527	2.24817	1.43463	0.0141702
Gain	chr2	171826603	171827195	1.19481	1.0503	1.2723	1.50619	3.52361	2.72366	1.36705	0.0141704
Gain	chr2	173999304	174000016	1.17774	1.59514	0.566877	0.812558	4.22772	3.10167	1.30534	0.0142318
Gain	chr2	104714656	104721030	3.14898	4.29023	1.88091	4.1615	11.59	7.1173	1.24552	0.0147864
Gain	chr2	112455171	112465628	3.31469	3.39722	4.74343	1.23723	7.14038	7.83604	1.04576	0.0148269
Gain	chr2	145372575	145374281	1.27595	1.36428	2.28887	1.1879	2.38796	4.42522	1.25343	0.0149316
Gain	chr2	33271660	33274646	1.70434	0.852181	0.929157	3.57207	3.32565	3.52716	1.30201	0.0152553
Gain	chr2	33048868	33052078	2.32913	0.978266	1.83777	4.38289	4.57647	4.84427	1.38011	0.0163264
Gain	chr2	73296374	73300020	3.38902	4.67782	4.27789	8.34665	8.34986	10.2609	1.09081	0.0163845
Gain	chr2	33280726	33293114	5.60033	2.6557	2.39898	12.6203	11.8199	10.7042	1.33018	0.0163933
Gain	chr2	26832368	26833560	1.34177	0.839847	1.19708	1.78064	2.67027	2.89514	1.25333	0.0169242
Gain	chr2	89495497	89497600	1.42183	1.3514	1.99786	1.60626	4.47713	2.75172	1.22952	0.0174578
Gain	chr2	44357350	44358740	0.867799	1.36273	0.774854	0.607398	2.78269	2.76885	1.20542	0.0177797
Gain	chr2	33061847	33064890	3.44829	1.72582	2.01826	7.4386	6.39171	7.24875	1.27262	0.0177799
Gain	chr2	54972229	54974751	1.36252	0.92304	0.811677	1.03333	2.98689	2.5902	1.17199	0.0193729
Gain	chr2	20189326	20189876	1.42876	0.540605	0.244515	3.11057	2.73536	2.97637	1.44002	0.0194945
Gain	chr2	112108191	112108914	1.34107	0.972465	1.07931	0.700186	2.50756	2.29949	1.38729	0.0199704
Gain	chr2	74523784	74525471	1.04158	1.31547	2.13904	2.65995	2.78011	2.63497	1.13592	0.0200654
Gain	chr2	87892422	87895232	2.18446	1.84961	2.06094	2.63639	5.36173	4.08391	1.15223	0.0204678
Gain	chr2	62329135	62330011	1.34648	1.23509	0.583769	0.990913	2.8122	3.51331	1.18725	0.0207571
Gain	chr2	90041731	90045104	3.35991	2.9134	3.32227	3.87066	8.94425	5.33934	1.26548	0.0211976
Gain	chr2	29385456	29389315	1.2169	0.982155	0.725994	0.694174	4.61455	1.8089	1.44031	0.0227326
Gain	chr2	33517732	33518862	1.69375	0.957715	1.23888	5.29324	4.36127	2.7902	1.32748	0.022813
Gain	chr2	128394295	128399927	3.47992	3.31222	1.99951	4.6711	9.05458	6.37416	1.08489	0.024385
Gain	chr2	6490594	6494414	2.03284	3.96872	5.23961	2.86821	8.51647	6.35999	1.21791	0.0248309
Gain	chr2	16893096	16896001	2.7	3.67147	4.65474	3.36428	5.43399	10.1325	1.16316	0.0248533
Gain	chr2	694145	698129	1.44871	3.21419	3.01574	3.12575	5.53568	6.15437	1.2273	0.025271
Gain	chr2	38813797	38838143	8.54705	3.47349	1.65567	15.6953	19.0482	14.6005	1.37056	0.0253889
Gain	chr2	162069829	162094931	3.67232	3.0938	3.67103	7.3353	7.91026	6.89925	1.02237	0.0254092
Gain	chr2	8369107	8376611	3.9336	2.99479	2.48811	3.39661	11.3739	6.07878	1.23746	0.0258804
Gain	chr2	219173075	219173623	1.48176	0.542575	0.785298	1.97867	2.9949	2.67039	1.42031	0.0261943
Gain	chr2	101839155	101841572	4.00459	2.26222	1.1478	3.03494	7.8623	7.35786	1.16438	0.0266451
Gain	chr2	191044187	191047849	2.16351	2.38784	2.64821	15.9416	8.11701	3.64277	1.28843	0.0283194
Gain	chr2	42786126	42790540	1.33734	1.66831	0.884961	1.72778	6.09825	2.3019	1.39733	0.0283577
Gain	chr2	172189975	172196364	2.90751	2.7927	3.52527	3.24886	7.24215	5.33517	1.04341	0.0287489
Gain	chr2	55380101	55380534	1.02789	1.37269	1.55216	1.2793	3.63062	2.69093	1.33733	0.0290497
Gain	chr2	64835999	64837111	2.66423	2.91961	3.77673	6.55005	5.97062	6.13949	1.02338	0.0297992
Gain	chr2	142942020	142945727	3.5385	2.79704	3.4227	1.78379	8.59125	5.9708	1.09818	0.0298605
Gain	chr2	219232036	219234515	1.73532	0.676985	1.1843	2.77412	3.75691	2.84552	1.34881	0.0313332
Gain	chr2	122655422	122655767	0.985952	1.48702	1.47967	2.72095	2.97001	3.01625	1.35238	0.0316744
Gain	chr2	98486590	98488291	1.14093	1.71832	1.10822	1.21975	2.59623	4.14623	1.12645	0.032527
Gain	chr2	168869271	168870148	1.67372	0.986949	1.10483	0.687351	3.55026	3.1414	1.20115	0.032856
Gain	chr2	33300330	33312997	7.6044	4.2047	4.42428	17.0568	14.2608	13.7599	1.12562	0.0332902
Gain	chr2	38735751	38736726	1.66698	1.05432	1.46323	2.3002	3.22887	3.33516	1.14766	0.033895
Gain	chr2	110962570	110964085	1.48863	1.69693	3.11047	2.24519	2.73401	4.67133	1.09194	0.0352859
Gain	chr2	90034640	90039367	2.90277	2.4399	1.59576	1.75126	8.11435	4.50925	1.16398	0.0362065
Gain	chr2	63651620	63652210	1.42086	1.32877	1.45898	1.10283	3.65146	2.90106	1.18502	0.0369841
Gain	chr2	239067578	239068278	1.75942	0.502186	0.230632	2.3761	3.66485	2.83574	1.44854	0.0384462
Gain	chr2	63981624	63983735	0.931871	1.8335	1.26307	0.811516	2.35173	4.71786	1.23445	0.0384627
Gain	chr2	87934305	87936093	1.01211	1.19579	1.05433	0.890567	2.48912	2.72233	1.06276	0.0391071
Gain	chr2	38725497	38726012	1.88166	1.88926	2.24546	1.49704	4.38134	4.14136	1.11647	0.0394671
Gain	chr2	120188410	120189293	1.54362	2.26683	1.82888	2.34844	5.42487	3.59793	1.14447	0.0400777
Gain	chr2	55385956	55386727	1.29168	1.43815	1.04711	1.59472	3.28343	2.83244	1.11173	0.0401483
Gain	chr2	54944114	54944960	1.08436	1.05504	0.858949	1.19701	3.15446	2.20025	1.1623	0.0425934
Gain	chr2	97759901	97761059	1.8566	2.12617	1.83667	2.91593	4.55146	4.69521	1.12782	0.0440883
Gain	chr2	3154609	3156735	0.888287	1.40044	1.43152	0.646904	4.09053	1.75234	1.29445	0.0446235
Gain	chr2	33238400	33239588	1.258	0.751573	1.17844	2.90327	2.10307	2.69589	1.12837	0.045191
Gain	chr2	99523171	99529423	4.60789	4.61212	1.39619	6.78291	14.3141	7.23232	1.13274	0.0462224
Gain	chr2	174895854	174897610	4.28646	3.80684	1.36491	4.63011	14.3099	6.02466	1.24006	0.0470249
Gain	chr2	173973532	173974751	2.12943	2.06425	1.06015	1.44443	5.41889	3.91053	1.0373	0.0479988
Gain	chr2	33294985	33300090	1.6857	0.800821	0.712426	2.68062	2.95179	2.94421	1.13605	0.0489912
Gain	chr2	104721784	104727455	2.50756	3.29899	1.5012	2.03009	8.70244	4.62618	1.11634	0.0493986
Gain	chr2	147069209	147071913	0.814893	1.77192	1.58386	0.517599	2.6213	3.4172	1.12049	0.0496535
Gain	chr2	64504372	64505420	1.35085	1.21328	1.87514	0.897474	2.22048	3.50575	1.057	0.0499268
Gain	chr2	64681053	64681643	1.24325	0.916393	2.27966	2.81835	2.55022	2.52266	1.16722	0.0499268
Gain	chr18	32968597	32970044	0.48931	0.523635	0.856005	0.500133	4.32908	3.39775	2.86025	8.92342e-10
Gain	chr18	57581232	57592521	1.45502	1.91643	2.18619	1.65065	9.46919	7.85282	2.26266	3.65646e-08
Gain	chr18	23752881	23755632	0.476771	0.521515	0.244782	0.482444	2.43961	2.70874	2.30561	5.80771e-08
Gain	chr18	33043879	33051422	0.800045	1.28505	0.782221	1.39194	7.21044	4.87148	2.4509	1.44839e-07
Gain	chr18	76963701	76965793	0.614349	0.789223	1.15867	0.749682	3.02772	3.62097	2.12972	8.5599e-07
Gain	chr18	32988159	32988951	0.364006	0.751257	0.713564	0.456616	3.974	2.78876	2.61379	1.68727e-06
Gain	chr18	57829002	57830260	0.375176	0.387156	2.05462	1.28464	5.08779	1.61839	3.10987	3.33313e-06
Gain	chr18	32750666	32762544	1.27684	0.941476	1.86911	2.0301	3.80345	8.73734	2.36814	3.60246e-06
Gain	chr18	2971033	2973197	0.884817	1.4384	0.933449	1.46065	5.64837	4.75157	2.07211	5.38463e-06
Gain	chr18	33052030	33053819	0.483782	0.771536	0.391388	0.283204	4.80324	2.55423	2.5156	5.93173e-06
Gain	chr18	23760628	23764311	0.961618	0.771807	0.614394	0.851837	3.65415	3.41966	1.9172	6.14826e-06
Gain	chr18	76951543	76958889	1.41798	1.22736	1.10394	1.99768	4.15414	7.74836	2.03702	8.44753e-06
Gain	chr18	2966644	2968905	0.730864	0.598572	0.512228	0.565609	4.22498	2.24095	2.20881	2.14762e-05
Gain	chr18	76999838	77010153	2.74218	1.44899	1.02391	3.49835	7.10584	18.8192	2.48485	2.64489e-05
Gain	chr18	57575898	57580653	0.982125	1.32095	1.73934	0.781649	3.31306	6.39491	1.95497	3.9902e-05
Gain	chr18	57548914	57550771	0.564941	1.12224	2.01584	1.07836	3.65033	3.42365	1.96498	4.62581e-05
Gain	chr18	57645075	57648420	0.737209	1.00354	1.31265	0.764738	2.77432	3.44577	1.73357	5.77174e-05
Gain	chr18	33008507	33009381	0.389874	1.05223	0.893053	0.772472	3.71902	3.06698	2.21233	7.94704e-05
Gain	chr18	72581221	72583566	1.3982	1.06194	1.0452	1.93447	3.54806	6.29148	1.85996	8.44894e-05
Gain	chr18	33022382	33024083	0.524213	0.811427	0.459119	0.978639	3.44152	2.10231	1.99965	0.000114539
Gain	chr18	45515097	45519207	0.300012	0.454507	0.308062	0.334703	3.46624	1.0094	2.53587	0.000170363
Gain	chr18	2961044	2963658	1.24434	1.31514	0.473994	1.89241	4.72878	3.62033	1.61822	0.000271505
Gain	chr18	32956158	32957327	1.413	1.45812	1.10546	4.31214	6.64589	4.01394	1.79567	0.000288778
Gain	chr18	44286171	44288320	0.964222	1.10837	0.551444	1.26874	2.81999	3.90637	1.60136	0.000313653
Gain	chr18	57912724	57919035	1.84588	1.80186	4.70437	8.49022	13.9307	4.29883	2.24289	0.000425588
Gain	chr18	57650767	57651423	0.27959	0.824335	0.861273	0.587878	2.50259	2.15578	2.10329	0.00047067
Gain	chr18	44288629	44299564	2.61071	2.14436	1.13587	2.278	6.1987	8.07066	1.46173	0.000540642
Gain	chr18	61636968	61638582	0.828679	1.35816	4.27125	5.32121	2.24826	9.33923	2.30536	0.00102724
Gain	chr18	31381363	31391414	1.84568	3.29737	5.00471	2.00284	7.96037	7.91029	1.52752	0.00104634
Gain	chr18	57905086	57909229	0.791551	0.784153	2.10024	1.88737	5.77791	1.65495	2.18603	0.00106962
Gain	chr18	74764601	74765064	1.24421	1.57574	0.406506	5.51468	5.02	4.81969	1.65861	0.00116355
Gain	chr18	76941342	76944517	1.45419	1.27894	0.933253	1.93817	3.04146	5.81304	1.56531	0.00123023
Gain	chr18	77016911	77021111	1.13686	1.12804	0.962112	1.45379	2.42983	5.03943	1.59635	0.00131707
Gain	chr18	23739919	23741463	1.17195	0.928937	0.575536	1.17183	3.01525	3.29701	1.48388	0.00133219
Gain	chr18	53447297	53448151	0.67522	1.33022	1.76485	4.26328	3.24513	3.66184	1.6805	0.00139499
Gain	chr18	72782350	72783515	2.4306	2.32242	2.51892	6.1074	5.28795	9.58978	1.53617	0.00142612
Gain	chr18	31329680	31332549	1.04234	1.63231	2.06551	0.454197	3.43735	4.55406	1.46628	0.00147221
Gain	chr18	58037450	58041537	0.333796	0.616043	1.33805	0.584598	4.5918	0.97861	2.50318	0.00156522
Gain	chr18	57536994	57543943	1.32151	2.05726	4.36169	0.712036	4.58365	5.01612	1.40602	0.00162613
Gain	chr18	53168586	53170087	0.873552	1.24399	2.08101	3.50364	5.10847	2.53114	1.75697	0.00195985
Gain	chr18	44333524	44335651	1.41813	1.14528	0.291235	1.4747	3.13889	4.41382	1.41606	0.00202591
Gain	chr18	61111641	61112474	1.0698	0.811733	0.840029	1.59195	2.66969	3.24754	1.55055	0.0021516
Gain	chr18	32989323	32996660	0.965549	1.91157	0.903326	1.00994	5.49429	3.73502	1.59523	0.00257183
Gain	chr18	31611070	31612515	0.798496	1.14235	1.69574	0.951567	3.60071	2.31985	1.51852	0.00353676
Gain	chr18	44255238	44263123	2.58222	2.11182	0.553535	2.29582	6.0377	6.04032	1.24903	0.00381449
Gain	chr18	57514399	57522568	1.49676	2.21077	1.53362	0.998682	6.51542	4.16063	1.42994	0.00394198
Gain	chr18	33173924	33174816	0.734644	0.970371	0.271568	0.405483	2.53166	2.44865	1.45926	0.00517786
Gain	chr18	77279855	77281610	1.04607	1.23369	2.74673	5.18262	2.06773	5.40547	1.59849	0.00528777
Gain	chr18	76982885	76984339	0.901769	0.818896	0.925964	2.22318	1.76568	3.15939	1.43542	0.0053686
Gain	chr18	74765293	74768669	1.79502	2.06884	1.149	4.80365	3.79362	6.46774	1.29197	0.00608864
Gain	chr18	60066474	60067905	0.568077	1.6641	1.74996	3.33776	3.0379	4.44213	1.65873	0.0069587
Gain	chr18	57522859	57523445	0.40234	1.1533	0.780365	0.328991	2.68431	2.11654	1.67262	0.00772947
Gain	chr18	33171970	33173816	1.40656	2.06724	0.962862	0.601207	4.93319	4.04943	1.27464	0.00804607
Gain	chr18	23746556	23748670	1.33999	1.49801	0.369466	0.924501	2.39698	5.90952	1.44208	0.00878433
Gain	chr18	5237291	5238295	2.6372	1.56279	0.509418	4.01128	6.27141	5.21688	1.35107	0.00884916
Gain	chr18	57593897	57594972	0.780416	1.30867	2.00339	1.27878	3.40631	2.54024	1.40867	0.00956563
Gain	chr18	57607824	57609891	1.49734	1.51896	2.50171	1.66924	3.87595	3.46048	1.17374	0.0105443
Gain	chr18	33068580	33078341	2.73114	2.89324	1.94874	3.48174	7.18979	5.93333	1.12076	0.0115304
Gain	chr18	62344082	62347093	1.49852	1.16877	0.921445	1.106	2.34275	5.27158	1.39197	0.0116233
Gain	chr18	32738149	32739911	1.6373	1.29023	2.2773	2.05386	2.37039	6.61021	1.47049	0.0166809
Gain	chr18	57619166	57630825	6.49286	9.44063	12.5738	12.7034	14.8797	23.7869	1.16267	0.0167639
Gain	chr18	23766458	23767015	1.17569	0.873529	0.676053	0.778702	3.00798	2.36013	1.38034	0.0185749
Gain	chr18	44327277	44330464	1.5228	0.951347	0.295826	1.15095	2.69692	3.50743	1.19215	0.0186357
Gain	chr18	77905140	77906459	1.15304	1.31294	3.65398	4.13302	2.05006	4.5555	1.30057	0.020486
Gain	chr18	44252102	44255108	1.60573	0.963584	0.457008	1.04362	2.57447	3.81771	1.21113	0.0207571
Gain	chr18	74686986	74687943	1.34221	1.15893	0.421903	1.18431	3.07501	3.08657	1.17913	0.0209721
Gain	chr18	60036766	60042039	2.3485	4.5235	5.52808	9.19544	5.59861	13.7904	1.37162	0.0275419
Gain	chr18	2981063	2982688	0.645547	1.41559	0.513722	0.816535	2.46478	2.64375	1.23183	0.0285648
Gain	chr18	53151053	53166033	1.71487	2.04618	3.48758	6.4696	6.68574	3.00049	1.27658	0.0300248
Gain	chr18	44351236	44352385	1.39194	1.01253	0.304602	1.19649	3.21691	2.52803	1.18009	0.0314413
Gain	chr18	77113657	77118885	2.54436	3.19526	0.850261	4.6396	5.23409	8.66764	1.09318	0.0336301
Gain	chr18	62379732	62382376	2.92674	2.94853	4.82881	2.63758	4.64924	8.68982	1.05541	0.0414889
Gain	chr18	72920011	72924488	5.1686	7.58925	8.28585	10.6845	9.71478	21.2636	1.15542	0.0419985
Gain	chr18	60032185	60033601	1.68523	3.43987	3.7081	4.99149	5.19735	6.82142	1.1316	0.0426482
Gain	chr18	57511350	57511974	1.17562	1.38647	1.94008	1.42907	3.23359	2.86251	1.11811	0.0473388
Gain	chr3	149750176	149756173	0.51188	0.465018	0.453735	0.446734	10.9307	5.11629	3.95177	7.90936e-14
Gain	chr3	149684100	149691422	1.25062	1.43107	1.7478	2.61077	9.83702	8.27934	2.65554	3.78536e-11
Gain	chr3	83483306	83485468	0.521675	0.888875	1.03397	0.290168	5.35271	4.87084	2.77575	8.6136e-10
Gain	chr3	183145004	183147165	0.934595	1.37777	1.07184	3.04817	6.54346	8.25208	2.56668	1.95555e-09
Gain	chr3	185959839	185960507	0.392249	0.850026	0.76527	0.32475	4.09616	6.68561	3.10314	6.28462e-09
Gain	chr3	182934463	182939643	1.02818	0.878081	0.785327	3.51776	4.50243	6.49381	2.40409	8.37053e-09
Gain	chr3	182892712	182894700	0.435379	0.408437	0.460608	0.521875	3.6338	2.36114	2.80865	8.45706e-09
Gain	chr3	182863708	182881751	2.196	1.44972	1.10805	5.21217	10.2379	11.3183	2.44396	1.00822e-08
Gain	chr3	149806828	149813725	0.502157	0.443603	0.421879	0.615917	5.96394	2.59361	3.08836	1.22512e-08
Gain	chr3	182096694	182141077	2.47906	1.43194	6.24889	9.38635	11.034	16.2753	2.677	1.24398e-08
Gain	chr3	182882306	182882971	0.433418	0.447257	0.32367	1.26861	3.03453	3.73096	2.95932	2.34106e-08
Gain	chr3	149739090	149742509	1.08956	0.902647	0.764245	0.875242	8.02268	4.86065	2.59736	3.65646e-08
Gain	chr3	182202366	182210848	1.80037	0.999158	2.26796	3.4461	7.34912	9.70436	2.48419	9.97559e-08
Gain	chr3	35532676	35536042	0.997597	0.90077	6.89044	0.415832	3.85575	6.52385	2.34168	1.24659e-07
Gain	chr3	149832215	149833960	0.556091	0.325697	0.432116	0.428598	6.08178	2.41935	3.20448	1.71717e-07
Gain	chr3	182334413	182336955	1.24861	0.937077	2.04502	1.31948	5.01083	5.68684	2.19872	1.98499e-07
Gain	chr3	151860865	151863307	0.515592	0.343619	0.441188	0.691683	4.43075	2.17663	2.86734	2.61204e-07
Gain	chr3	183176368	183179399	0.995307	1.22357	1.47525	1.67195	4.24788	8.46576	2.4134	3.27612e-07
Gain	chr3	78211907	78213395	0.458213	0.381912	0.615278	2.30211	4.87702	2.15273	2.9674	3.72786e-07
Gain	chr3	182840055	182853019	1.02213	0.649572	0.752356	2.1561	3.8389	4.70132	2.24047	3.9164e-07
Gain	chr3	149901352	149902633	0.552668	0.633683	0.819716	0.79085	5.45074	2.71353	2.73391	5.44584e-07
Gain	chr3	138327129	138329080	2.6349	3.56527	2.51234	7.18504	13.2489	13.9644	2.0385	6.41297e-07
Gain	chr3	129276903	129280363	2.06232	1.70567	2.25	1.22059	8.01672	8.39999	2.00258	7.29644e-07
Gain	chr3	83572247	83572775	0.446453	0.358329	1.27342	0.82139	3.6909	2.72438	2.8839	1.12387e-06
Gain	chr3	182899416	182905034	1.10215	0.481926	0.498725	1.6454	4.74279	4.97052	2.50126	1.13628e-06
Gain	chr3	56336621	56345883	2.8811	2.48196	4.25288	15.2818	14.8991	10.1426	2.11985	1.33674e-06
Gain	chr3	182898557	182899112	0.61356	0.194816	0.436169	0.82492	4.12775	2.41331	3.00268	1.66781e-06
Gain	chr3	10411544	10414222	0.832597	0.879398	0.6236	0.810966	7.01961	3.27414	2.49536	2.4666e-06
Gain	chr3	183279439	183284582	2.65272	2.58476	1.62386	4.12497	8.69672	12.2695	1.8792	3.92574e-06
Gain	chr3	150803470	150804238	0.682483	0.774703	1.40159	3.35885	3.74168	3.42511	2.23969	4.76148e-06
Gain	chr3	166377032	166381654	1.64612	1.22423	0.716916	0.971229	6.40922	5.48778	1.95216	5.10355e-06
Gain	chr3	171814712	171822780	0.676444	0.432921	0.848205	0.718	1.974	7.50773	2.96879	5.56785e-06
Gain	chr3	144517807	144518757	5.18759	19.9323	6.46013	14.6463	1208.19	83.4544	5.28619	5.88371e-06
Gain	chr3	183287256	183306940	2.2009	1.96991	1.01294	3.83465	6.56893	11.2571	1.9681	6.28773e-06
Gain	chr3	182928136	182934084	2.12173	1.69787	1.29995	7.63269	6.92683	7.87757	1.83122	7.06168e-06
Gain	chr3	182907084	182907812	0.503952	0.445752	0.776209	1.15897	2.39638	2.45414	2.40754	7.10059e-06
Gain	chr3	178982292	178985857	1.4644	1.67063	0.725399	2.34222	5.41765	6.38277	1.79947	7.78817e-06
Gain	chr3	55518619	55523076	4.0616	2.84887	4.84754	6.15677	11.564	20.3947	2.08172	8.57012e-06
Gain	chr3	182897663	182898233	0.551485	0.711368	0.471901	1.01463	4.37925	2.43695	2.70748	1.05999e-05
Gain	chr3	13393541	13395279	0.829949	1.41704	1.39454	1.45755	4.9835	4.52954	2.01627	1.25163e-05
Gain	chr3	142837737	142839721	1.71859	1.17321	0.556558	2.00658	6.09154	5.75827	1.92944	1.35664e-05
Gain	chr3	151840627	151841684	0.719285	0.537493	0.687646	0.342246	4.56506	2.513	2.36027	1.40227e-05
Gain	chr3	182890044	182891513	0.749757	0.368427	0.6049	0.72255	4.17108	2.31578	2.47062	1.56095e-05
Gain	chr3	183002861	183006070	1.75761	1.35819	1.03249	1.69204	4.89802	7.93439	1.91659	1.89437e-05
Gain	chr3	182895201	182896220	0.797535	0.451323	0.396258	0.66266	2.72018	3.09384	2.15483	1.96211e-05
Gain	chr3	107085771	107086718	0.968831	0.65699	1.22221	0.483814	4.62503	3.14534	2.19047	2.32412e-05
Gain	chr3	129310521	129312913	1.90807	1.58425	2.22951	1.957	8.34524	5.77334	1.91682	2.63459e-05
Gain	chr3	182093612	182095741	0.960956	0.355973	1.98613	1.92665	2.94296	4.39801	2.33358	5.04688e-05
Gain	chr3	149840295	149843041	1.92966	1.30123	1.65773	3.44477	8.72876	5.28261	2.02362	5.15454e-05
Gain	chr3	78096911	78097773	1.21629	0.753077	1.09281	4.41956	5.63626	3.45514	2.10784	6.3954e-05
Gain	chr3	142442474	142443801	1.87721	1.67207	1.09568	4.99882	5.62305	6.62369	1.69566	7.1397e-05
Gain	chr3	48540996	48542171	1.78514	1.17436	2.15381	5.97336	5.62164	5.57816	1.79858	8.04873e-05
Gain	chr3	183164547	183168024	2.39176	2.49149	2.23901	4.12972	6.93356	8.7876	1.57193	0.000116287
Gain	chr3	184893013	184894232	1.57019	1.44276	1.45771	3.38352	4.21158	6.82307	1.77088	0.000124562
Gain	chr3	11549749	11552681	0.671023	0.55396	0.826832	0.748966	1.60001	5.74397	2.42643	0.000132767
Gain	chr3	78082895	78085989	2.55208	1.70613	4.50108	10.5451	10.5031	6.2542	1.88234	0.000183107
Gain	chr3	171855455	171857435	0.702069	0.478435	0.707304	0.536168	1.62539	3.70026	2.04274	0.000184098
Gain	chr3	53078973	53080432	2.03102	2.50392	4.5586	2.41398	7.97699	6.94388	1.61808	0.000189959
Gain	chr3	182856164	182857638	0.960705	0.605844	0.730727	0.96559	2.67066	3.11655	1.78029	0.000196653
Gain	chr3	138312704	138313681	0.697626	0.664525	1.29493	1.70311	4.76336	1.93094	2.26424	0.000221665
Gain	chr3	12837157	12840638	3.34613	3.62407	3.70675	5.03316	11.0377	10.2261	1.50555	0.000223531
Gain	chr3	196005989	196008463	0.763389	0.722117	0.903629	0.93633	2.03449	3.13238	1.68485	0.000238702
Gain	chr3	99820910	99826860	2.46937	2.78029	2.42243	3.0342	6.56188	11.2278	1.63676	0.000242657
Gain	chr3	106020712	106022469	2.67191	1.50955	0.980953	1.20836	7.17038	8.08485	1.73272	0.000246306
Gain	chr3	149820826	149826368	1.83212	1.0992	1.6528	2.26024	7.90385	4.32142	1.95868	0.000265922
Gain	chr3	29803891	29806941	0.696677	0.532535	0.989152	0.356044	6.43318	1.52298	2.64824	0.000279184
Gain	chr3	182200190	182201434	1.34896	0.84827	0.887364	1.18275	3.63177	4.01164	1.72643	0.000292076
Gain	chr3	77625678	77628866	0.452581	0.45005	0.659063	0.658563	7.57265	1.02852	3.17726	0.000297757
Gain	chr3	183103372	183103819	0.761472	1.14846	0.781902	1.2932	3.74655	3.88253	1.95388	0.000321171
Gain	chr3	10398252	10400381	1.46607	1.57645	1.03734	1.59798	7.36545	3.90805	1.8187	0.000340351
Gain	chr3	183024454	183025214	1.10345	1.06752	0.566529	1.83982	3.24087	4.37537	1.72944	0.000357526
Gain	chr3	35526406	35527340	0.813907	0.463391	2.68015	0.438905	2.78429	2.1792	1.91955	0.000394819
Gain	chr3	183186750	183188264	1.17784	0.76859	1.03158	1.48185	2.64537	4.60881	1.78634	0.000435939
Gain	chr3	182163677	182164548	1.08336	0.590033	1.08153	0.830496	3.73182	2.84956	1.89043	0.000476801
Gain	chr3	136505437	136506319	1.12931	0.797355	0.976509	1.01152	3.33619	3.23617	1.72194	0.000512283
Gain	chr3	183284771	183286054	1.02186	0.717056	0.629569	0.902421	2.53438	3.25116	1.65398	0.000567056
Gain	chr3	182966718	182968133	1.16752	1.30042	0.646998	1.90936	3.62862	3.73776	1.53906	0.000569266
Gain	chr3	99801612	99806231	0.579358	0.509937	0.635728	0.768083	1.23819	3.39915	1.94786	0.000582979
Gain	chr3	182225021	182228595	2.61314	0.961982	2.7134	2.14726	6.4484	9.52919	2.01882	0.000617257
Gain	chr3	158099703	158101457	1.27096	1.20353	2.18021	2.68219	3.80602	3.80864	1.49398	0.000664048
Gain	chr3	56347681	56359174	4.66201	5.42106	5.57947	15.9511	19.3413	12.4673	1.56239	0.000697418
Gain	chr3	158117831	158123480	2.96784	2.74628	3.94407	4.84077	7.8148	8.33844	1.3821	0.000739955
Gain	chr3	133968899	133970214	1.73481	2.67502	2.9894	6.08997	5.67432	8.62889	1.5962	0.000779359
Gain	chr3	182886268	182888673	1.19974	0.697807	1.03034	0.872884	4.02906	2.63354	1.71742	0.00109966
Gain	chr3	81791097	81793316	1.07566	1.02463	1.1288	1.01126	3.85745	2.6639	1.54485	0.00116595
Gain	chr3	178978527	178980060	1.59091	1.00621	1.51064	3.6666	3.21551	5.7504	1.67713	0.00118921
Gain	chr3	81793423	81793984	0.840475	1.01186	1.24659	0.51544	4.02273	2.69705	1.79586	0.00121067
Gain	chr3	183098525	183100175	1.16028	1.08252	0.832358	1.79842	3.09138	3.44654	1.43541	0.00136988
Gain	chr3	183978652	183979998	1.94814	1.68869	1.4803	2.2043	4.57739	5.92151	1.4271	0.00146194
Gain	chr3	171778811	171780714	1.22662	1.03823	1.47182	2.91604	2.24883	7.08643	1.91683	0.00149972
Gain	chr3	284369	286428	0.942655	0.907029	1.03335	0.714818	5.20464	2.09883	1.87503	0.00150006
Gain	chr3	182030578	182031156	1.26902	1.12246	1.48922	1.91784	3.07637	4.76364	1.65367	0.00158498
Gain	chr3	184405117	184405729	1.92637	1.76701	1.14288	4.6468	6.03499	5.35067	1.52322	0.00159793
Gain	chr3	149849669	149851258	1.15529	0.715305	0.813451	1.07794	5.73057	2.18789	1.99231	0.00181386
Gain	chr3	77876051	77881934	1.3201	0.575276	0.499161	1.60002	11.1309	1.97637	2.70826	0.0018674
Gain	chr3	48470531	48471548	2.0622	1.40983	0.688197	4.07862	6.15767	4.66209	1.52264	0.00198888
Gain	chr3	171859165	171861025	1.24087	0.698448	0.810828	0.985825	2.15354	5.76809	1.89974	0.00202639
Gain	chr3	142798040	142799835	1.09583	1.0102	0.660136	0.497311	4.27223	2.43501	1.6036	0.0021012
Gain	chr3	107115536	107116305	1.22687	0.597857	1.39977	0.752408	5.87214	2.2912	2.06663	0.00210859
Gain	chr3	182056848	182061602	1.39623	1.1276	2.10238	2.24391	3.11925	3.86702	1.34077	0.00216756
Gain	chr3	196010484	196015743	2.70896	3.71698	3.87791	4.74534	7.40437	10.166	1.34432	0.00230797
Gain	chr3	141120291	141122172	2.71896	3.06478	1.73242	7.08031	6.87995	8.35755	1.30109	0.00234083
Gain	chr3	53303347	53305509	3.16645	2.85442	1.03397	2.03118	9.89775	7.14543	1.39268	0.00244245
Gain	chr3	83506646	83507292	0.730057	1.13005	2.0407	0.671585	4.39427	2.2275	1.82066	0.00249672
Gain	chr3	29723915	29726255	1.02007	1.74669	1.87617	0.464028	9.6134	2.75973	2.10212	0.00267432
Gain	chr3	129510279	129515095	1.78684	1.59654	1.01808	2.09475	5.99465	3.83788	1.43609	0.002684
Gain	chr3	142800210	142803093	3.79428	2.17837	1.28001	1.70753	10.8083	7.8663	1.54033	0.00277405
Gain	chr3	29782698	29785149	0.652827	0.894548	1.07694	0.216588	7.61359	1.30727	2.47467	0.00291045
Gain	chr3	8018913	8020280	0.863207	1.00954	0.650002	0.988177	2.37876	2.85173	1.40721	0.00315709
Gain	chr3	182862272	182863455	1.13033	0.61752	0.364129	1.18252	3.61636	2.14064	1.67893	0.00350758
Gain	chr3	142888741	142892800	1.82915	1.74749	1.25436	0.915646	5.18874	4.13728	1.28701	0.00394198
Gain	chr3	170062119	170063730	1.56277	0.839932	0.651908	0.748752	3.39992	3.80738	1.46455	0.00408069
Gain	chr3	158085209	158088284	1.43322	1.5406	2.76814	1.78144	3.34078	4.36217	1.25855	0.00423352
Gain	chr3	128837748	128840683	3.99521	4.2888	4.2676	4.57142	9.9169	10.6383	1.1989	0.00438965
Gain	chr3	182061859	182091291	3.62422	3.00116	5.55793	7.39784	6.95953	10.3249	1.25896	0.00498508
Gain	chr3	141128375	141131375	1.11052	1.42571	0.413027	3.8289	3.16175	3.22919	1.24205	0.00538643
Gain	chr3	142803673	142804852	1.35655	0.872049	0.707892	0.490978	4.15114	2.50588	1.70768	0.00538952
Gain	chr3	128717173	128718201	0.969073	0.789487	0.602281	0.445729	4.19439	1.81109	1.70275	0.00557272
Gain	chr3	107113541	107114191	1.12867	1.08151	0.993384	0.556215	4.94607	2.40466	1.67316	0.00577206
Gain	chr3	129324758	129326104	1.61696	1.04538	0.860177	1.88172	5.39115	2.89619	1.55733	0.00644653
Gain	chr3	55781055	55782495	1.12906	1.37182	2.05691	1.94324	2.78122	3.69015	1.28142	0.00660593
Gain	chr3	78098060	78098769	0.739197	0.91536	0.796981	3.05997	2.70174	2.09985	1.50951	0.00663391
Gain	chr3	182831783	182834768	3.68225	3.49148	4.35857	7.42948	8.7184	8.6045	1.16533	0.00666477
Gain	chr3	193261299	193264389	0.71313	1.17394	0.749698	2.36634	1.87284	3.60946	1.41966	0.00804607
Gain	chr3	36884891	36886111	1.16056	1.04237	1.6772	1.206	3.11401	2.64559	1.29848	0.00894719
Gain	chr3	129462766	129468236	1.20391	0.970127	0.640271	0.869225	5.31562	1.89847	1.64804	0.00966628
Gain	chr3	78178640	78183141	3.36908	1.69021	3.39363	18.086	9.95212	5.69599	1.52508	0.00989307
Gain	chr3	141159876	141160426	3.28614	3.04705	2.73857	5.03824	10.0089	6.89977	1.30864	0.010082
Gain	chr3	58460144	58461840	1.36078	1.72338	1.36554	1.26602	3.43147	4.07059	1.18476	0.0107673
Gain	chr3	182168902	182169947	1.32964	0.647213	2.18965	1.0616	3.27478	2.51808	1.44352	0.0117289
Gain	chr3	182040204	182054958	4.79123	3.88527	6.48483	7.36217	8.57108	12.2953	1.14673	0.0120763
Gain	chr3	142916197	142931791	6.3757	5.39852	2.19608	4.43633	12.8362	14.2764	1.09015	0.0123143
Gain	chr3	127905906	127906390	0.973911	1.50751	0.833368	1.59273	4.37888	2.81784	1.48742	0.0125155
Gain	chr3	181996767	181997295	1.24015	1.12618	2.19028	2.7836	2.84912	3.47593	1.36873	0.0127574
Gain	chr3	29682808	29685106	0.66203	0.930523	0.879041	0.315003	5.40855	1.18891	1.97815	0.0127623
Gain	chr3	56346063	56346895	1.19709	1.39786	1.84381	3.3616	3.74205	3.07247	1.28463	0.0130726
Gain	chr3	66351936	66353739	1.20734	1.05075	1.50859	1.55222	2.39247	3.25065	1.19303	0.0142271
Gain	chr3	128734026	128736096	2.30611	2.75893	1.10593	2.21466	9.16311	4.5593	1.35775	0.0150653
Gain	chr3	13023236	13024709	1.38863	0.992054	0.603259	1.11364	3.85766	2.32636	1.32628	0.0154986
Gain	chr3	194695814	194697372	1.31292	1.16377	0.933329	1.47099	2.41691	3.63399	1.19495	0.0155092
Gain	chr3	90302197	90303001	1.20613	0.807336	0.903764	1.19949	3.57435	2.12984	1.44134	0.0156466
Gain	chr3	66461183	66463008	2.5293	2.18	0.900153	4.01889	5.94664	5.07578	1.12379	0.0169004
Gain	chr3	44596312	44597555	3.33292	1.52376	0.151623	11.9729	6.00274	7.35059	1.34325	0.0170662
Gain	chr3	142896769	142903822	3.06907	2.90219	2.10094	1.80004	6.85666	6.41459	1.04866	0.0172618
Gain	chr3	160472234	160474355	2.80717	3.36897	4.73642	6.82557	5.34313	10.3749	1.21947	0.0172703
Gain	chr3	101495779	101501179	2.88603	2.10077	2.0854	3.97338	7.19204	5.02853	1.18888	0.017926
Gain	chr3	29727259	29729877	0.771514	1.35449	1.3375	0.42399	6.01638	1.62239	1.77956	0.0180896
Gain	chr3	169581537	169582174	1.23393	1.01866	2.40736	1.36212	3.59722	2.49261	1.33595	0.0193638
Gain	chr3	142933880	142942154	3.19338	3.50805	1.11038	1.43817	8.31206	6.70526	1.06152	0.0196944
Gain	chr3	29426137	29426460	0.485953	1.42083	1.82964	0.372527	4.12318	2.60753	1.68456	0.0197164
Gain	chr3	129405134	129410634	1.32615	1.37341	0.930677	1.14094	5.40494	2.18624	1.40867	0.0197606
Gain	chr3	181976926	181980633	2.90864	1.19769	1.80218	5.21465	6.62358	5.17336	1.39871	0.0202767
Gain	chr3	182219447	182220277	1.67364	0.879836	0.972764	1.01672	3.17397	3.37888	1.29021	0.0208545
Gain	chr3	33791055	33791629	1.77986	0.988987	1.26527	0.923608	4.17007	3.11143	1.35747	0.0219911
Gain	chr3	132440823	132441206	1.70843	0.775712	0.701707	1.50873	3.21133	3.88253	1.42975	0.0221174
Gain	chr3	182630924	182633204	2.95663	2.45745	2.52799	4.03211	5.03075	7.41851	1.08755	0.0227416
Gain	chr3	14266914	14268207	1.64263	1.36025	1.9574	3.58179	3.46777	3.53328	1.1048	0.0241963
Gain	chr3	190438445	190440739	1.97812	0.979342	0.892315	1.75657	3.62691	3.85445	1.22692	0.0250014
Gain	chr3	40547134	40547980	1.73497	0.575477	2.19509	5.13005	2.99269	3.72576	1.43957	0.0262266
Gain	chr3	46886588	46888154	2.46171	3.19699	1.63358	4.39045	5.18075	8.00787	1.08994	0.0266135
Gain	chr3	182992789	182994644	1.55526	1.16722	0.987229	1.50873	2.08552	5.32844	1.33431	0.0267167
Gain	chr3	51976260	51977295	5.09125	4.07759	4.88973	6.54756	8.9603	11.4647	1.04517	0.0279914
Gain	chr3	129345148	129347391	5.50791	4.36842	6.08797	9.16536	13.0972	9.46756	1.09079	0.0283261
Gain	chr3	182023549	182030138	3.44843	2.92573	2.97669	5.29316	7.50576	6.34967	1.0134	0.0296501
Gain	chr3	158132691	158135473	2.02728	1.26494	1.64597	3.41756	3.61866	4.0625	1.10036	0.0298605
Gain	chr3	155523325	155524476	1.91344	2.46817	2.85361	3.1432	3.36	8.32587	1.28349	0.0301859
Gain	chr3	129494251	129495452	1.68103	1.82482	1.25537	1.90788	5.52854	3.01817	1.21638	0.0313332
Gain	chr3	183542584	183543384	2.52259	0.946596	2.01839	4.4	3.72049	6.26633	1.40344	0.0316744
Gain	chr3	158178027	158179099	1.27172	1.13567	1.93365	2.58721	3.00083	2.61682	1.11742	0.0323762
Gain	chr3	169528766	169532390	6.84088	7.76152	5.70131	15.869	12.1142	20.8793	1.04977	0.0329253
Gain	chr3	129485424	129493949	3.1917	2.94424	1.33369	3.48251	9.05971	5.23427	1.12579	0.0333174
Gain	chr3	129375022	129385300	2.30529	1.63862	0.891282	1.8999	6.30831	3.39399	1.20131	0.0349243
Gain	chr3	196844182	196844750	1.70639	1.95124	1.89424	1.23032	4.03344	4.27965	1.10654	0.0364953
Gain	chr3	129530699	129535492	1.31372	1.38391	0.933033	0.931551	4.30856	2.19249	1.18	0.0368626
Gain	chr3	158149545	158152273	1.6443	1.19074	1.72791	2.98098	2.68611	3.78778	1.06205	0.0368957
Gain	chr3	142320452	142322341	1.22183	0.988613	1.46846	3.3719	2.24736	2.7872	1.04202	0.0390174
Gain	chr3	112592172	112594293	1.44687	1.09747	1.25712	2.3662	2.64735	2.93916	1.02143	0.0397187
Gain	chr3	143145327	143149923	3.51066	2.04406	0.615463	1.29179	9.14288	4.87018	1.23575	0.0416069
Gain	chr3	129539158	129548237	3.00852	2.70496	1.98827	2.80744	7.79772	4.90122	1.05246	0.0423084
Gain	chr3	53269973	53270729	0.623972	1.00162	0.569523	0.478331	2.17199	2.19925	1.17687	0.0434888
Gain	chr3	142377798	142380386	1.68254	0.88905	1.05118	3.16082	2.44767	3.78145	1.15453	0.0436518
Gain	chr3	32316521	32318232	1.11894	1.32866	0.519394	2.03045	3.36139	2.13358	1.09918	0.0448901
Gain	chr3	181649520	181650775	1.85947	1.46608	5.62081	1.7682	2.45452	6.03399	1.21639	0.0473388
Gain	chr3	129508640	129509839	1.00592	0.925213	0.763457	1.08629	2.76888	1.69796	1.15205	0.0473388
Gain	chr3	158182431	158182962	1.43046	0.814418	1.57014	3.72079	3.41254	2.52218	1.24842	0.0497355
Gain	chr17	1665332	1667196	0.379904	0.275876	0.418992	0.284758	3.69173	4.90302	3.69367	2.69161e-15
Gain	chr17	78817108	78820715	0.952781	0.735527	1.32935	3.96754	5.0128	4.15973	2.33981	6.19514e-08
Gain	chr17	27481548	27483412	0.984935	0.566272	0.274512	0.634235	4.11417	3.15765	2.15079	1.1865e-05
Gain	chr17	58155627	58156492	0.818153	0.938086	2.42697	1.86763	3.5599	4.01703	2.04129	1.45811e-05
Gain	chr17	29335043	29335993	0.855401	0.370171	0.113336	2.76681	3.24172	3.23993	2.30512	1.65883e-05
Gain	chr17	73091985	73092802	0.737841	0.993132	0.329408	0.85581	5.31819	3.37182	2.23019	1.65883e-05
Gain	chr17	21338310	21338972	0.554119	0.6535	1.05669	2.47587	5.99318	2.28618	2.7005	3.37574e-05
Gain	chr17	33370183	33373021	0.924322	0.801222	0.446087	0.391134	4.28328	2.32815	1.84593	0.000295341
Gain	chr17	74117682	74119135	1.6604	1.30369	1.00073	3.40347	7.44451	4.15276	1.87135	0.000297044
Gain	chr17	21271613	21274798	3.4758	2.70284	3.14618	4.58398	10.6439	8.83647	1.55973	0.000387875
Gain	chr17	30410498	30411766	2.66757	2.88079	3.01518	6.06823	7.18014	8.67435	1.52248	0.000430015
Gain	chr17	77907175	77908521	1.052	0.904657	0.440091	0.448028	4.93341	2.67482	1.85886	0.000454053
Gain	chr17	43502330	43503178	1.69998	1.4991	0.507808	1.13733	7.90791	4.39014	1.85166	0.000467561
Gain	chr17	44343390	44345670	3.84246	4.09574	5.00873	5.55606	10.0615	13.6387	1.46052	0.000505517
Gain	chr17	41855822	41856644	0.98844	0.888389	0.949479	1.67189	2.49726	4.83075	1.79802	0.000618967
Gain	chr17	42903313	42904538	0.941783	0.949767	0.83518	0.767904	3.10131	2.99962	1.59012	0.000648973
Gain	chr17	1635621	1638472	1.06733	0.996963	0.803076	1.30348	3.49508	2.849	1.51125	0.000682647
Gain	chr17	42905453	42908308	2.48081	2.91085	3.91541	3.47389	6.63254	9.17016	1.44076	0.00074563
Gain	chr17	1618341	1619526	1.48244	1.43845	1.99933	1.38407	4.82331	4.10645	1.53171	0.000830518
Gain	chr17	78799573	78803130	1.81434	1.63633	1.17385	2.79527	7.83667	4.13438	1.70541	0.000851881
Gain	chr17	33253047	33253425	0.692388	0.643047	0.639868	0.445853	3.97673	2.16356	2.16227	0.000929722
Gain	chr17	28657732	28661670	1.49228	1.09308	1.44339	1.92432	3.43498	4.38423	1.46802	0.000997181
Gain	chr17	43249612	43250760	1.27896	0.848441	1.59469	1.68075	4.11408	3.02763	1.68365	0.00100224
Gain	chr17	8023783	8030316	1.13255	1.3635	1.20005	3.30656	3.33944	3.58234	1.36712	0.00107113
Gain	chr17	7348396	7349104	0.666216	0.80207	0.30404	0.953333	3.09205	2.06776	1.79332	0.00118629
Gain	chr17	74655522	74656385	0.850419	1.12831	0.779674	0.391153	5.86761	2.272	2.02196	0.0012009
Gain	chr17	44025828	44026703	2.726	2.44209	2.73762	1.98409	7.62507	7.63032	1.42507	0.00133033
Gain	chr17	33406447	33410661	2.44672	2.47987	1.13791	0.922064	9.74394	5.63579	1.54889	0.00156994
Gain	chr17	1365923	1367241	1.23349	1.31394	1.81816	1.57393	4.05129	3.56051	1.46065	0.00159417
Gain	chr17	33394624	33397913	1.3719	1.23462	0.458648	0.286155	6.68424	2.83979	1.79467	0.00165043
Gain	chr17	21276026	21278338	1.1799	0.831231	0.384437	1.76378	4.48725	2.39565	1.68474	0.00214409
Gain	chr17	48738751	48739830	0.971907	1.3289	1.22253	0.514087	5.99448	2.48482	1.82238	0.00273432
Gain	chr17	38519062	38519475	1.90156	0.654092	0.520687	4.13991	3.80602	5.52182	1.80571	0.00314069
Gain	chr17	28705907	28707004	2.36604	2.34294	2.84671	5.32042	6.42655	6.06495	1.31109	0.00352368
Gain	chr17	46079058	46081493	5.24614	4.27979	2.62155	2.74496	12.2196	12.1895	1.24934	0.00400098
Gain	chr17	33399603	33402929	1.54594	1.14764	0.453547	0.486133	6.56872	2.7634	1.69718	0.00419391
Gain	chr17	57929935	57931518	3.54525	2.66691	2.39856	2.42312	6.94165	9.8828	1.28796	0.0054552
Gain	chr17	21666823	21668823	1.54747	1.93521	1.03689	1.60449	6.59063	3.63844	1.45953	0.0055562
Gain	chr17	41080511	41081448	3.91664	3.52205	2.32685	2.80515	11.2476	8.55647	1.29847	0.00566018
Gain	chr17	1953435	1953813	0.761626	1.50044	2.13289	1.97449	3.88635	3.40925	1.66348	0.00577206
Gain	chr17	3542585	3544436	2.15373	1.08201	1.73138	2.68509	4.84589	4.57518	1.42717	0.00609883
Gain	chr17	7530584	7531289	1.22659	2.14794	3.24415	3.41923	3.88149	6.05367	1.44954	0.00673888
Gain	chr17	33388883	33393741	5.11976	4.99902	1.81338	1.58978	14.4235	10.7237	1.20898	0.00781925
Gain	chr17	7343238	7344669	0.494777	0.850959	0.319884	0.556293	3.8512	1.2667	1.81798	0.00966372
Gain	chr17	64709374	64711821	1.01836	0.741144	1.01266	1.03541	1.76308	2.99437	1.30023	0.0121447
Gain	chr17	30042200	30042925	1.08436	2.01417	3.11767	1.82877	4.57666	3.86756	1.35846	0.0122574
Gain	chr17	62777054	62778462	2.8495	1.88345	0.975318	4.93417	5.29979	6.47217	1.22464	0.0123638
Gain	chr17	36570849	36573877	9.69436	9.09203	11.8226	12.1536	17.6416	28.1049	1.15597	0.0124475
Gain	chr17	80315932	80317361	2.16538	2.23452	2.09158	1.65433	5.07824	5.24766	1.13654	0.0125115
Gain	chr17	16310402	16310810	0.962402	0.794506	0.395289	1.6526	3.35004	2.43014	1.54618	0.0129017
Gain	chr17	38104428	38105631	1.72183	1.32698	1.83516	1.64407	3.69854	3.67357	1.20012	0.013644
Gain	chr17	38514941	38515666	1.9157	1.64118	2.48671	3.19203	4.43511	4.68898	1.21533	0.0141702
Gain	chr17	62922781	62924828	2.20388	1.54702	2.57877	2.20417	4.81699	4.17372	1.18669	0.015077
Gain	chr17	74379851	74380770	2.22482	3.26719	2.69456	3.56848	5.51045	8.1837	1.20296	0.0161955
Gain	chr17	58807041	58808450	1.61916	1.40198	1.31861	2.02021	2.84237	4.7053	1.20396	0.0169661
Gain	chr17	75229716	75232379	1.36921	0.94534	0.404588	0.770225	1.91587	5.02747	1.45185	0.0174707
Gain	chr17	58179458	58180377	1.65435	1.76605	1.78661	2.49269	2.82969	6.77923	1.34501	0.017945
Gain	chr17	20811564	20811977	1.83817	0.654092	1.56206	0.349851	3.30958	4.08134	1.44908	0.0182013
Gain	chr17	43509492	43510736	1.8759	0.565514	0.411217	2.44306	4.40214	3.4528	1.58755	0.018636
Gain	chr17	64780389	64785633	3.12696	2.16842	0.945278	2.66481	7.90229	5.29179	1.21496	0.0189334
Gain	chr17	58391667	58392328	1.34775	1.75893	1.58743	3.02659	4.24296	3.6409	1.23599	0.0193069
Gain	chr17	1672643	1674985	1.98239	0.982394	2.5186	3.92541	3.7719	4.13606	1.27326	0.019873
Gain	chr17	25665593	25668803	1.44651	1.09633	1.85455	2.02981	6.22997	1.94235	1.60576	0.0203342
Gain	chr17	25680042	25681572	4.07934	4.05041	4.38239	5.07707	9.28509	8.78045	1.0307	0.0230965
Gain	chr17	49020895	49022674	1.76909	2.29719	2.67942	4.2448	5.85015	3.9087	1.163	0.0243105
Gain	chr17	7381934	7384140	3.87618	3.23922	2.68601	7.71116	7.52753	8.21893	1.02141	0.0251855
Gain	chr17	55932832	55933608	0.878094	1.04554	1.07505	1.55339	2.24834	2.55837	1.21268	0.0272239
Gain	chr17	10022139	10023239	1.69223	1.08219	0.905527	1.40322	4.29344	2.77596	1.25143	0.028399
Gain	chr17	33349375	33350586	1.19083	1.72039	0.86706	0.338594	2.96756	3.54681	1.1003	0.0293559
Gain	chr17	40825658	40829117	3.33707	5.18109	3.59793	5.85354	13.4839	7.44727	1.20981	0.0320038
Gain	chr17	16131665	16132563	1.37191	0.873529	1.37875	1.02037	3.0101	2.34938	1.20172	0.035877
Gain	chr17	7254923	7255804	1.66613	1.2895	1.03872	3.09273	3.72834	3.1835	1.11942	0.0372194
Gain	chr17	78702083	78702367	1.65736	1.14019	2.74183	2.45633	3.48551	3.57465	1.31823	0.0393552
Gain	chr17	58546291	58548055	1.24889	1.21205	1.54193	1.2446	4.09497	2.0132	1.22277	0.0398606
Gain	chr17	56865603	56866266	0.908967	1.18268	1.82613	1.23607	3.45637	1.94594	1.24682	0.0462748
Gain	chr17	61674416	61675442	1.48199	1.23927	1.39057	1.52783	2.76835	3.26631	1.03116	0.0486963
Gain	chr17	78228155	78229283	2.64972	1.75093	0.883069	0.620064	6.64452	3.85158	1.16133	0.0491202
Gain	chr19	919102	920981	0.167499	0.244867	0.487313	0.43657	7.52498	1.58605	4.48913	2.32369e-08
Gain	chr19	48927719	48928680	0.763786	0.675578	0.672238	0.250933	5.05623	3.84863	2.56138	9.56644e-08
Gain	chr19	51320293	51321214	0.76846	0.704887	2.39646	0.733094	3.26938	3.74609	2.20146	3.06006e-06
Gain	chr19	56096900	56098636	0.57408	0.732718	0.698071	1.00061	3.45105	2.47481	2.13594	7.5012e-06
Gain	chr19	5126197	5132402	3.19668	2.79695	4.3158	11.9843	13.3462	10.1379	1.86665	1.07803e-05
Gain	chr19	56059804	56062503	1.25376	1.15338	0.568851	2.55703	5.20156	3.92049	1.80464	4.35954e-05
Gain	chr19	33771100	33772006	1.15729	0.806112	0.415918	0.904908	3.47451	4.32857	1.94112	5.04688e-05
Gain	chr19	38754433	38756247	1.30123	1.01455	2.55352	2.20782	4.07653	4.2988	1.76217	5.39112e-05
Gain	chr19	51323000	51324748	1.18529	0.510932	3.09666	0.358853	4.91583	3.46653	2.20337	5.75091e-05
Gain	chr19	43167386	43167885	9.76183	183.598	43.9212	94.6278	10966.3	426.146	5.77952	0.000121895
Gain	chr19	20377045	20388928	4.01218	3.17415	2.82062	4.1235	15.8646	10.2747	1.76516	0.000140631
Gain	chr19	20358243	20360372	0.751517	0.928073	0.607224	0.509995	4.43857	2.41482	1.92945	0.00018097
Gain	chr19	10433032	10434173	0.712335	0.73508	0.873017	0.465039	2.9395	2.15409	1.77624	0.000441931
Gain	chr19	5143196	5143922	0.90239	0.40973	0.444768	1.49421	2.63856	2.49507	1.93027	0.000661958
Gain	chr19	14182554	14186202	1.5102	1.66974	1.26273	3.95603	4.6467	4.44666	1.4183	0.000746089
Gain	chr19	41328231	41330061	1.10355	1.15357	2.57535	4.37706	2.8436	4.27481	1.53287	0.000787368
Gain	chr19	1255518	1256814	0.809298	0.876897	0.74791	1.15394	2.35052	2.81626	1.55497	0.00102252
Gain	chr19	47324324	47325562	0.720105	0.546396	0.956904	2.10419	1.85232	2.28627	1.62555	0.00126861
Gain	chr19	15560200	15561021	1.05349	1.08713	1.11454	1.82076	3.16705	3.38564	1.53054	0.00176498
Gain	chr19	2982668	2984477	1.5223	1.00239	0.580595	0.840223	6.07491	3.00649	1.76131	0.00197829
Gain	chr19	408522	409238	1.02477	1.13303	2.59309	0.572351	4.77743	2.70315	1.69142	0.00234726
Gain	chr19	36596480	36597818	0.9015	0.829168	0.845193	1.37014	3.19774	2.15264	1.54251	0.00262583
Gain	chr19	14317174	14317984	1.16485	1.13526	1.0632	0.773901	3.21001	3.30901	1.47055	0.00292945
Gain	chr19	52192076	52195432	2.22783	1.08092	2.11102	2.09254	3.98968	7.73499	1.68745	0.00321493
Gain	chr19	19738472	19739973	2.09652	1.44231	5.13078	4.70902	3.87697	7.19638	1.52037	0.00335239
Gain	chr19	13991096	13993627	2.53916	2.09619	1.08548	4.67159	6.37192	5.8195	1.2882	0.00380658
Gain	chr19	10025229	10026118	1.03197	1.49089	0.756897	1.2748	3.65634	3.43408	1.44322	0.0038366
Gain	chr19	18775971	18777506	1.14465	1.39276	0.999933	3.42608	4.9731	2.75012	1.51967	0.00415756
Gain	chr19	55795319	55796552	2.12654	2.21639	2.62031	4.32325	4.69121	7.20879	1.3357	0.00418965
Gain	chr19	20455907	20457045	0.806367	0.784566	1.08823	0.657008	4.24042	1.54892	1.8531	0.00451411
Gain	chr19	609970	611580	2.62252	2.80711	3.56263	6.80288	9.20673	5.8303	1.37654	0.00494332
Gain	chr19	7990443	7990989	1.24731	0.940601	2.90638	2.692	3.81993	2.81643	1.55095	0.0056285
Gain	chr19	20434740	20436353	0.812933	1.04022	0.467457	0.478607	5.79392	1.63191	1.94459	0.00602756
Gain	chr19	940320	941201	1.19009	1.53511	1.43587	1.17688	4.0002	3.26802	1.34414	0.00816178
Gain	chr19	17433980	17435337	1.77777	0.897329	0.992104	4.81728	6.17987	2.78124	1.66557	0.0103772
Gain	chr19	12944133	12945610	2.13057	2.38181	1.3491	2.6459	5.42319	5.22854	1.14829	0.0117101
Gain	chr19	4648382	4648930	1.14717	0.937174	1.0307	3.51763	2.74532	2.98721	1.39707	0.0121243
Gain	chr19	45667094	45668362	1.1787	1.62178	0.721945	2.73926	3.4821	3.46582	1.21177	0.0128282
Gain	chr19	23906440	23907756	2.25155	1.74772	0.941151	3.8125	4.47359	5.11303	1.20292	0.0129001
Gain	chr19	12946467	12947928	1.20259	1.07429	0.589779	0.776039	2.71784	2.87233	1.19148	0.0139116
Gain	chr19	44808464	44809279	2.4119	1.85839	3.00496	4.23037	5.03737	5.38986	1.20195	0.0140589
Gain	chr19	1400283	1403529	3.21654	2.86056	2.03316	3.50907	7.15254	6.61955	1.07676	0.0166071
Gain	chr19	18542734	18545289	2.15599	1.70571	6.93669	11.9754	7.63884	3.35392	1.42279	0.0168548
Gain	chr19	51713794	51714898	0.902422	1.37235	0.463317	0.939375	4.74288	2.04632	1.50079	0.0184895
Gain	chr19	6429459	6430434	1.18302	0.305198	0.662595	0.346267	4.38706	1.52755	1.9795	0.018636
Gain	chr19	17207825	17209071	2.29376	2.30186	1.49097	1.95518	6.23552	4.60299	1.15737	0.0191528
Gain	chr19	50427051	50429146	2.31616	1.38239	2.2626	2.34948	5.24598	4.06628	1.23209	0.019685
Gain	chr19	1622581	1624432	1.2894	1.49141	1.60044	1.85089	3.64366	2.80414	1.12887	0.0231016
Gain	chr19	48828321	48829307	1.54205	1.75591	0.791713	2.66589	5.30991	3.04623	1.23475	0.0293288
Gain	chr19	45613019	45614664	1.59426	1.13516	1.16229	1.56923	4.05806	2.61163	1.16458	0.0371338
Gain	chr19	11372747	11373722	2.07028	1.94217	1.65649	5.4908	4.49235	4.27715	1.03601	0.0376852
Gain	chr19	33554727	33555877	1.48193	1.85862	0.42139	3.18787	5.14854	2.89284	1.18047	0.0385265
Gain	chr19	30155579	30156992	2.26412	1.37887	0.952813	2.52665	5.11147	3.65518	1.13729	0.0401142
Gain	chr19	1655279	1655920	2.37073	1.72937	1.30111	2.51926	6.56271	3.5608	1.21286	0.0463122
Gain	chr7	95063295	95065191	0.78849	0.942141	0.681806	11.9999	8.3604	8.78921	3.24678	4.18948e-15
Gain	chr7	128471151	128473590	1.55943	1.06542	2.72768	1.98856	12.1013	10.7234	3.01268	4.14598e-12
Gain	chr7	13781600	13783401	0.495122	0.450822	0.912141	0.629616	3.36459	3.26805	2.74162	6.93421e-10
Gain	chr7	64973534	64977073	1.46033	0.887348	0.92102	1.13198	5.91223	7.56676	2.54072	2.07726e-08
Gain	chr7	27198172	27199348	0.557381	0.391121	1.09888	2.9944	2.53195	4.85564	2.92818	2.26539e-08
Gain	chr7	13494328	13511661	3.1973	2.67295	10.0156	11.9947	14.157	13.5566	2.12627	8.08677e-08
Gain	chr7	29724257	29725439	0.976015	0.640933	2.43717	4.93814	3.50359	5.50315	2.32676	1.6827e-06
Gain	chr7	102613505	102614016	0.35877	0.95201	0.894676	1.22585	4.88389	3.49428	2.73363	2.89306e-06
Gain	chr7	102246978	102248101	1.98445	2.6983	2.78086	2.5772	10.8492	6.12362	3.3974	3.92574e-06
Gain	chr7	13869107	13871179	1.48107	1.68511	2.46968	1.21106	7.15487	5.76555	1.93144	5.65753e-06
Gain	chr7	13515900	13517280	0.855081	0.588256	2.10726	1.57319	3.62137	3.14876	2.13532	6.41322e-06
Gain	chr7	13321634	13324156	0.842473	0.633248	1.74083	1.46389	2.57958	4.10689	2.05495	7.94163e-06
Gain	chr7	35042732	35045067	0.864981	0.672348	0.865118	0.857705	8.4169	2.77627	2.77693	9.82178e-06
Gain	chr7	73426647	73428642	3.41823	3.67661	5.07592	5.13998	15.4281	11.9759	1.85178	1.08378e-05
Gain	chr7	45179818	45181170	2.96744	1.70122	2.09112	2.03395	8.9876	11.4048	2.03264	1.42329e-05
Gain	chr7	31085997	31091080	0.805207	1.1505	0.863911	1.03036	15.2068	3.37239	3.16796	1.6072e-05
Gain	chr7	13564231	13564911	0.92481	0.636227	2.21579	1.87872	3.62158	3.50283	2.1703	1.81598e-05
Gain	chr7	69490499	69497122	0.950779	0.915729	6.76486	0.830897	2.63732	6.29082	2.12129	3.13884e-05
Gain	chr7	13431972	13432954	0.907641	0.881527	2.05587	2.25926	5.05275	2.98279	2.10179	5.66557e-05
Gain	chr7	13452164	13456478	2.21973	2.00821	4.72718	5.16921	11.5424	6.18469	1.97817	6.5022e-05
Gain	chr7	69082023	69085971	1.32902	0.980591	5.62247	1.27148	3.38291	5.00236	1.72976	0.000121507
Gain	chr7	22481081	22488764	3.13505	4.32763	3.68555	13.0563	14.8268	10.9657	1.69293	0.000128248
Gain	chr7	95049211	95052415	0.70414	1.08994	0.714625	11.2225	2.70399	3.73692	1.73855	0.000148613
Gain	chr7	77649320	77649774	1.0958	0.773697	1.36208	3.0241	5.26987	3.49513	2.12957	0.00015778
Gain	chr7	72838244	72838871	0.79393	0.733041	0.514883	2.57542	4.19995	2.49273	2.12166	0.000189959
Gain	chr7	104885347	104888585	2.11455	1.647	1.56399	1.13283	4.61093	8.99874	1.71382	0.000450845
Gain	chr7	98822035	98822604	0.736603	1.37772	0.945458	1.05876	4.62731	3.2695	1.91684	0.000486374
Gain	chr7	104951820	104952618	1.21519	0.948965	0.843102	1.29914	4.37287	3.4209	1.72517	0.000540087
Gain	chr7	102618614	102619152	1.0224	1.70816	1.39977	0.806151	5.91027	4.42565	1.81073	0.000573343
Gain	chr7	13889330	13890678	1.28387	0.7628	1.13854	0.912622	3.19942	3.86814	1.66925	0.000620592
Gain	chr7	69880253	69882334	1.20998	1.11855	1.87661	1.60004	2.945	4.43973	1.55774	0.000621211
Gain	chr7	104944399	104948164	1.67929	1.50281	1.16626	0.929438	5.18451	4.3679	1.47527	0.000635159
Gain	chr7	150657812	150658323	0.563782	0.899121	0.473652	0.942959	4.28177	2.42658	2.07542	0.000743199
Gain	chr7	112061790	112064362	2.64149	2.53639	2.25157	1.98897	7.37536	7.49405	1.39648	0.000803882
Gain	chr7	70033604	70034463	1.12899	0.881655	1.78593	0.982432	3.10677	3.61166	1.63382	0.000825321
Gain	chr7	13679009	13679507	1.15694	0.488406	0.971984	1.11265	3.98144	2.88817	2.02007	0.000834155
Gain	chr7	25129215	25134984	3.40639	2.36534	3.68458	3.88663	7.54541	10.0599	1.48043	0.00101197
Gain	chr7	50242741	50245540	2.73661	2.51452	2.64644	3.25025	7.68272	7.09948	1.38624	0.00105055
Gain	chr7	102576161	102576933	1.69738	0.840758	1.53377	1.093	5.71641	3.79313	1.83397	0.00106826
Gain	chr7	88942218	88943480	0.831084	1.02915	2.43214	0.516052	2.73925	3.22653	1.52773	0.00112558
Gain	chr7	69497367	69498975	0.782841	1.02663	4.67235	1.0352	2.19278	3.67549	1.58966	0.00121864
Gain	chr7	142503848	142508868	2.23165	1.41303	2.52229	1.35098	4.09331	10.3332	1.84773	0.00122227
Gain	chr7	22477921	22480496	1.89477	1.9868	2.75104	5.63198	5.29237	5.44036	1.34508	0.00146785
Gain	chr7	30201769	30203986	2.81581	2.30749	1.81014	2.56852	7.56742	6.91223	1.39422	0.00147337
Gain	chr7	65086638	65090024	1.24738	0.983397	1.08991	0.741226	3.73185	2.78047	1.48676	0.00156018
Gain	chr7	130949585	130950609	1.04966	1.58514	1.49844	0.800733	4.17734	3.83026	1.52678	0.00162982
Gain	chr7	102147775	102148940	3.84845	3.80877	3.23531	3.66444	13.6312	10.1225	1.45075	0.00164803
Gain	chr7	29233275	29249158	3.74359	2.38164	3.1044	8.69299	7.89933	10.5062	1.46262	0.00167771
Gain	chr7	23928	24498	84.6529	74.0771	91.5488	104.422	213.923	248.308	1.34171	0.00183925
Gain	chr7	20104513	20105752	1.46021	1.28846	1.41247	1.47953	4.25414	3.52684	1.45449	0.00189985
Gain	chr7	75798980	75799829	0.987915	1.72034	1.93374	0.795192	4.1911	3.65415	1.61013	0.00202639
Gain	chr7	150691204	150692353	1.80268	2.70794	2.53054	3.88335	6.96997	6.00678	1.44483	0.00209094
Gain	chr7	87562848	87564295	2.70026	2.52467	3.57289	3.15084	7.49901	6.65822	1.34986	0.00215117
Gain	chr7	69397259	69401101	1.25642	0.894896	5.12547	0.992475	2.21052	5.27612	1.67003	0.0023575
Gain	chr7	13680676	13682132	1.09865	0.576158	1.71993	1.29231	5.47784	2.02947	2.02763	0.00250652
Gain	chr7	65111899	65113360	4.81034	3.01911	1.93521	2.93904	8.87984	13.1549	1.64488	0.0026204
Gain	chr7	69091513	69098388	1.0953	1.05939	7.24191	0.888214	1.96777	6.80832	1.87847	0.0026332
Gain	chr7	77619430	77620131	1.3831	2.12161	1.72728	1.10039	5.61143	4.70771	1.47018	0.00311087
Gain	chr7	158607245	158608371	0.861522	1.2975	0.884637	1.32801	2.82665	3.41745	1.45365	0.00325305
Gain	chr7	13591551	13592167	0.850616	1.05333	0.829766	0.821612	2.94241	2.85935	1.5684	0.00348777
Gain	chr7	73129604	73130085	1.30663	1.12363	1.5653	1.10181	3.55333	3.91797	1.55747	0.00355918
Gain	chr7	1495167	1495626	0.51342	1.35397	1.17155	1.4169	3.27648	2.97098	1.68451	0.00368934
Gain	chr7	104958359	104961764	2.48855	1.77296	1.49522	1.46001	5.76266	5.70502	1.31521	0.00381449
Gain	chr7	75567048	75567955	0.982611	0.685932	0.771569	0.717812	3.05571	2.1619	1.57162	0.00418965
Gain	chr7	69469405	69481724	1.85309	1.88589	10.577	1.88102	3.45322	8.59804	1.55438	0.00422062
Gain	chr7	88548387	88549265	1.40313	0.492913	1.56339	0.741494	4.2087	2.74206	1.77272	0.00460686
Gain	chr7	104894637	104900765	4.84669	3.10161	2.87964	4.61999	8.89747	13.2248	1.36256	0.00509126
Gain	chr7	127876818	127878184	2.07321	3.28835	3.11441	1.3774	7.34196	7.19816	1.32609	0.00513521
Gain	chr7	64912404	64914609	1.30851	1.06795	1.62455	0.973907	2.81052	3.44676	1.28128	0.00517793
Gain	chr7	7758281	7759924	1.50043	1.51539	2.40936	1.29215	5.77153	3.14381	1.486	0.0052307
Gain	chr7	70034749	70035541	1.58839	1.36592	1.93682	1.73514	3.36926	5.10751	1.39862	0.00536452
Gain	chr7	69110379	69136066	2.43128	2.41931	11.0654	1.949	4.16309	12.5305	1.64413	0.00542708
Gain	chr7	47626071	47626680	1.76377	1.1986	1.01598	1.34549	4.5485	4.03274	1.4351	0.00544
Gain	chr7	23312100	23317061	5.84907	6.50517	3.63836	4.89411	12.709	18.3883	1.21272	0.0055562
Gain	chr7	52775316	52777477	1.5172	1.57817	2.39294	5.2701	3.18459	4.85011	1.2726	0.00619247
Gain	chr7	149569494	149571754	2.8435	1.72465	1.40627	7.21737	4.3632	11.1218	1.61834	0.00622651
Gain	chr7	88748417	88749378	1.55485	0.478534	3.3892	0.752799	4.84258	2.91876	1.84451	0.00648434
Gain	chr7	93621128	93624034	2.97891	2.24497	2.61391	4.26826	9.17922	5.51327	1.39507	0.00654649
Gain	chr7	38385459	38386005	1.82299	0.940601	1.52708	3.22158	4.19566	4.04294	1.50449	0.00720412
Gain	chr7	68938305	68939902	2.36469	1.37261	2.56303	2.4321	5.16599	5.10025	1.34209	0.00730581
Gain	chr7	23639754	23641331	1.26385	1.71606	1.29776	1.22382	3.38634	4.20435	1.25344	0.00753851
Gain	chr7	64964642	64968844	4.01458	2.51916	1.95536	1.45309	8.11733	9.60702	1.31162	0.00769659
Gain	chr7	13440399	13441026	1.29536	1.12112	1.845	1.38381	4.30904	2.73014	1.50288	0.00803277
Gain	chr7	30373476	30377228	2.44725	2.55425	1.14158	1.36361	8.49737	4.95242	1.33385	0.00823868
Gain	chr7	38387838	38393825	5.45602	4.37304	1.65597	12.6746	11.3894	12.4573	1.15265	0.00858059
Gain	chr7	104948481	104951506	1.9512	1.53921	0.988419	0.925384	4.8223	3.98261	1.22235	0.0086287
Gain	chr7	105761506	105762942	1.4609	1.56409	1.74387	1.2767	5.19652	3.06063	1.37704	0.00868806
Gain	chr7	13471614	13472664	1.54802	0.979084	5.33271	4.73148	7.26801	2.3406	1.82601	0.00882471
Gain	chr7	13450986	13451744	1.27923	0.642199	2.5916	1.87648	3.42993	2.45535	1.53455	0.00884916
Gain	chr7	30312970	30315786	4.08015	3.64327	2.79308	4.636	8.46322	9.74698	1.13708	0.00910463
Gain	chr7	22474141	22475686	1.39185	1.50636	1.6732	2.38899	4.27623	3.18237	1.26721	0.00922059
Gain	chr7	64963219	64964261	2.64176	2.5963	1.83426	1.80527	7.65217	6.26565	1.22751	0.00923486
Gain	chr7	64750312	64751678	3.87767	2.91198	1.7149	3.58476	13.0301	6.63467	1.45215	0.00950858
Gain	chr7	94284211	94287072	2.24639	3.40621	4.38736	9.34551	7.18116	6.88491	1.2032	0.00951677
Gain	chr7	13482781	13484127	1.1494	1.1459	3.64075	2.40143	3.78906	2.39812	1.34794	0.00983709
Gain	chr7	93664566	93699451	6.41783	6.22766	10.5686	8.72009	16.0549	13.6065	1.12528	0.0101266
Gain	chr7	76008399	76010594	5.23396	6.05464	4.54001	5.18851	12.2604	13.9177	1.10867	0.0103352
Gain	chr7	6940063	6943363	3.10033	3.33878	3.0529	5.22138	9.9722	6.2478	1.26006	0.0104738
Gain	chr7	16792709	16794907	1.76614	1.78559	3.00212	1.78935	6.8851	3.27693	1.44369	0.0105279
Gain	chr7	105042787	105043255	1.34285	1.21251	0.976704	0.566178	5.40471	2.91397	1.53191	0.0117072
Gain	chr7	1124108	1128290	4.39136	4.88763	4.50273	6.6481	8.62291	14.126	1.1701	0.0121164
Gain	chr7	14486054	14486389	1.32769	1.61187	2.24546	0.862134	3.87398	4.51113	1.43447	0.0121447
Gain	chr7	22472584	22473228	1.42396	0.797688	2.13058	2.09585	3.98304	2.65818	1.48145	0.0121625
Gain	chr7	99844569	99846270	2.06602	1.52739	1.40902	1.6027	6.42014	3.50386	1.39505	0.012728
Gain	chr7	129418888	129421089	3.22954	4.02133	2.12921	5.68961	8.66465	8.13603	1.11392	0.0127927
Gain	chr7	2797244	2798152	2.07853	1.28098	0.711434	0.371789	4.25822	4.23704	1.26626	0.0140263
Gain	chr7	128337498	128337899	2.48054	2.15557	0.804345	3.90319	6.3907	5.4394	1.27538	0.0151587
Gain	chr7	38401414	38403025	3.20693	3.29253	1.75514	6.57404	7.11857	8.06179	1.07985	0.0155521
Gain	chr7	44139269	44141481	2.81032	2.88782	3.10489	4.12328	5.69613	7.47804	1.0883	0.0156466
Gain	chr7	74957076	74965471	7.73243	7.79226	3.99883	7.1505	12.8841	8.42577	1.99478	0.015799
Gain	chr7	129424762	129425766	1.09666	1.07779	1.09927	2.01765	3.23795	2.37356	1.25862	0.0178808
Gain	chr7	93738251	93738649	1.4469	1.90031	2.29611	1.87552	6.78215	3.17608	1.48324	0.0184608
Gain	chr7	76017226	76019989	8.0984	7.9847	4.17247	5.44105	20.9069	15.8223	1.08958	0.0191314
Gain	chr7	29263193	29266495	1.71606	1.07399	1.40316	2.38255	3.02822	3.78403	1.17341	0.0195469
Gain	chr7	7907471	7909590	3.03262	2.73349	4.55024	3.68928	5.38049	8.14599	1.10135	0.0200743
Gain	chr7	1039269	1045878	2.77104	3.70345	2.21353	4.65996	9.16726	5.99965	1.16333	0.0207471
Gain	chr7	38383651	38385233	2.07213	1.81328	1.20855	2.88213	4.37103	4.33234	1.09763	0.0207571
Gain	chr7	27199719	27200950	2.36429	2.39582	3.19322	5.1728	4.19836	7.26083	1.15236	0.0216009
Gain	chr7	104814744	104816218	1.47664	1.6523	1.22397	1.60386	3.13513	4.14417	1.10362	0.0218236
Gain	chr7	128523769	128524674	4.08394	4.36379	6.54307	6.98081	9.7923	9.07809	1.0594	0.0222432
Gain	chr7	101361270	101362289	2.93287	1.88494	0.898185	1.94065	6.98516	4.994	1.21831	0.0236426
Gain	chr7	73130353	73131123	1.59968	1.89661	1.29311	1.90989	4.0874	4.12525	1.1266	0.0250557
Gain	chr7	104940785	104943007	1.54639	1.40087	0.848488	0.770995	3.45161	3.17449	1.05825	0.0255509
Gain	chr7	64725019	64727100	5.96168	4.98147	5.35805	7.66397	11.4839	13.2118	1.00501	0.0256623
Gain	chr7	104889198	104894339	2.36796	1.4535	1.483	0.999955	3.44407	6.33527	1.22205	0.0261533
Gain	chr7	13486773	13488347	1.51617	1.11756	3.49009	2.85079	4.93695	2.24028	1.37146	0.0261994
Gain	chr7	99840047	99842113	2.64065	2.89528	2.13791	2.83791	9.21398	4.64025	1.2352	0.0265196
Gain	chr7	5496907	5497775	1.47967	1.33995	1.20929	2.50009	4.61189	2.60205	1.27563	0.0285648
Gain	chr7	69062407	69068899	3.27766	3.22801	9.17136	4.02639	4.98012	11.1861	1.18403	0.0307909
Gain	chr7	65263702	65264213	1.69135	1.79824	2.21038	2.12166	4.21487	3.97959	1.16598	0.0310541
Gain	chr7	76750943	76751676	3.53938	3.87376	7.92948	7.86022	6.58016	8.26016	1.10549	0.031055
Gain	chr7	93656363	93660309	3.27104	3.62934	6.49233	2.58094	11.5424	5.63444	1.22019	0.0316331
Gain	chr7	97831337	97832601	1.9707	2.41895	3.57854	3.89289	4.49501	5.10714	1.02514	0.031857
Gain	chr7	101916381	101917575	1.47128	1.13303	1.14998	1.57565	3.26776	2.74474	1.10985	0.0333576
Gain	chr7	98361531	98362390	1.80029	1.19653	1.62927	1.17892	3.82372	3.20715	1.16455	0.0345587
Gain	chr7	52622825	52625723	1.80133	2.26051	2.89997	5.77888	3.52112	5.57991	1.03452	0.0356078
Gain	chr7	2902525	2904506	4.23677	1.47557	0.938064	4.05577	5.06381	13.5775	1.56167	0.0356231
Gain	chr7	13475581	13476004	1.85671	1.5328	3.11399	3.52987	5.25123	3.57486	1.24307	0.0358384
Gain	chr7	44498888	44502660	6.44735	4.97377	2.92095	15.5536	13.3821	11.3671	1.00417	0.0362065
Gain	chr7	30333992	30338559	1.96466	2.08075	1.24464	1.21544	7.43123	3.06251	1.29148	0.0369103
Gain	chr7	13467172	13470937	1.75594	1.208	4.09979	5.83944	7.57666	1.95962	1.59979	0.0383639
Gain	chr7	64729909	64731591	1.93342	1.72163	0.976636	1.13312	4.43696	3.54341	1.02717	0.0410214
Gain	chr7	6969946	6970554	1.29268	1.64522	1.41586	2.10083	5.6809	2.4481	1.33499	0.0415517
Gain	chr7	69349819	69356637	4.14076	2.97441	8.2034	2.23379	4.6918	15.9168	1.38955	0.0416933
Gain	chr7	44010086	44010910	0.954236	1.90376	1.76371	1.81414	5.06546	2.95166	1.26825	0.0436518
Gain	chr7	88651269	88662076	4.01586	0.701539	5.44496	2.41219	7.02324	10.1181	1.72166	0.0457136
Gain	chr7	64600692	64601597	3.70741	2.7199	2.40904	2.13155	5.40656	9.13294	1.04536	0.0485852
Gain	chr13	36050373	36052416	0.410826	0.251717	2.09606	2.25572	5.31241	2.80819	3.56628	1.20621e-10
Gain	chr13	79408146	79410670	1.40301	0.99738	1.44065	1.83558	11.5311	7.13463	2.85536	2.44418e-09
Gain	chr13	36054331	36060845	0.652513	0.490463	2.48983	1.58956	3.34392	3.44785	2.46661	3.78371e-09
Gain	chr13	44913601	44915809	0.938469	0.784555	0.988044	0.841449	4.65199	4.0495	2.26197	1.54002e-07
Gain	chr13	36052705	36053069	0.143789	0.296761	1.77176	1.78568	2.72156	2.51886	3.8014	1.78598e-07
Gain	chr13	50887962	50889995	0.838592	0.758862	1.40424	0.593406	4.15967	3.72601	2.21331	2.67071e-07
Gain	chr13	51185107	51188193	1.05408	1.10528	2.45277	1.19643	3.8615	5.62646	2.02179	1.63405e-06
Gain	chr13	50782542	50784349	2.64157	2.50125	3.8004	0.707637	9.81396	10.9948	1.90955	1.92412e-06
Gain	chr13	66711527	66714274	1.58518	1.69493	6.36378	3.15363	9.95963	5.98599	2.19666	2.28688e-06
Gain	chr13	76050674	76057798	6.23535	4.25669	1.92495	15.2936	24.4707	21.0817	2.00576	4.00947e-06
Gain	chr13	35630131	35635604	0.838922	0.489744	0.516858	0.881978	9.26752	2.68727	3.0799	6.41322e-06
Gain	chr13	51329539	51331155	1.00617	1.18902	1.26646	0.567292	3.98255	4.37955	1.86035	1.42343e-05
Gain	chr13	51093974	51107998	1.50432	1.87673	4.28823	0.824452	4.85786	8.47939	1.86665	2.68228e-05
Gain	chr13	76067894	76070004	0.932312	0.833804	0.727568	0.903382	6.55551	2.825	2.32103	3.14627e-05
Gain	chr13	85029539	85030185	1.01397	1.13005	1.49929	1.49241	5.24136	3.87893	2.03117	5.81142e-05
Gain	chr13	76209737	76211604	2.68315	2.72534	3.30328	5.71187	15.4951	7.8881	2.03425	6.03595e-05
Gain	chr13	35515536	35521772	0.48385	0.369048	0.544355	0.781823	7.23308	1.18723	3.24112	8.35897e-05
Gain	chr13	50893469	50894567	0.883471	0.960962	1.93694	0.351443	3.70905	3.30103	1.81966	9.76226e-05
Gain	chr13	66062244	66063818	1.66613	1.10037	6.29585	1.44072	7.96001	4.07037	2.03604	0.000196609
Gain	chr13	40643577	40644890	1.21821	0.989202	1.45596	0.551136	3.25858	4.51957	1.66735	0.000285856
Gain	chr13	67263478	67265024	1.69628	1.61041	5.32989	2.05976	6.70912	4.62591	1.68353	0.000287352
Gain	chr13	66921677	66923075	1.31301	0.871032	2.0031	1.48393	7.73718	2.8063	2.24316	0.000416555
Gain	chr13	66732888	66734355	1.68031	0.977662	3.78119	1.34841	10.3136	3.52072	2.29735	0.000453898
Gain	chr13	50552330	50552838	0.51555	0.90442	2.11753	0.901091	2.69188	2.68497	1.9465	0.000672695
Gain	chr13	85441073	85442113	1.23519	1.95097	2.20017	1.25221	9.41084	3.93847	2.00692	0.000734436
Gain	chr13	36145385	36148194	0.80312	0.674576	1.02604	1.39169	4.70537	1.74203	2.04558	0.000777412
Gain	chr13	79419075	79422662	1.91618	1.25284	2.30554	2.1462	8.39169	3.91283	1.85729	0.00112005
Gain	chr13	51160245	51175887	5.18858	5.19499	9.62722	6.04613	11.7392	18.2196	1.4051	0.00120051
Gain	chr13	50995202	50998578	1.01796	1.11461	4.53215	0.729125	2.44455	3.93657	1.46984	0.00133033
Gain	chr13	66878641	66883000	1.55282	1.34155	3.4918	2.09839	12.4289	2.90655	2.33331	0.00133033
Gain	chr13	34365566	34370112	1.30428	1.19109	1.40446	1.35378	4.82888	2.96736	1.54866	0.00144436
Gain	chr13	103798909	103799392	0.921705	0.447593	0.835089	0.498755	3.60942	1.95089	2.04447	0.00145661
Gain	chr13	75937199	76022536	11.9147	7.82414	5.77035	28.0612	31.6712	27.2938	1.46791	0.00145806
Gain	chr13	44815646	44819756	0.938336	0.856318	0.570242	1.05109	1.83311	4.66621	1.73424	0.00154
Gain	chr13	67228872	67235735	4.29712	2.93123	8.67958	15.8048	17.5063	8.47821	1.75036	0.0015778
Gain	chr13	85438492	85439448	1.31619	2.1788	2.11172	1.26122	9.41363	3.84277	1.8565	0.00226628
Gain	chr13	51146265	51147656	0.923731	0.544701	1.99382	0.658987	2.55922	2.12423	1.566	0.00239686
Gain	chr13	43597302	43598904	1.7025	2.12851	2.15161	5.43634	3.86775	8.43257	1.54163	0.00331349
Gain	chr13	67797892	67798395	1.71819	1.18204	5.18595	0.862134	4.2138	4.23997	1.54371	0.00335722
Gain	chr13	41049909	41057527	6.56812	4.25437	4.80981	2.7438	11.2757	23.4589	1.54254	0.00399269
Gain	chr13	66028024	66029457	2.98282	2.0961	15.427	3.93912	9.29209	5.82217	1.4734	0.00435231
Gain	chr13	99982823	99994356	0.548309	0.800596	0.296695	0.211385	7.91463	0.911287	2.65459	0.00476576
Gain	chr13	62693424	62695533	1.86551	1.19355	3.99714	6.08642	4.3183	4.20417	1.36022	0.00482567
Gain	chr13	99972301	99980221	0.622825	0.529896	0.292554	0.444944	6.3613	0.787387	2.57538	0.00515916
Gain	chr13	86370875	86375646	5.796	3.45586	7.50997	14.5182	18.9647	10.1434	1.55619	0.00574778
Gain	chr13	67063488	67068649	4.34139	2.92197	6.27442	5.00378	18.0561	7.02315	1.6951	0.00631919
Gain	chr13	78051796	78052892	3.18151	3.85085	3.53706	2.79467	6.99447	11.0764	1.25529	0.00764609
Gain	chr13	50559472	50560338	1.02908	1.34304	1.181	1.61489	5.33369	2.37878	1.62454	0.00768379
Gain	chr13	51190955	51192284	0.848409	1.22163	2.91741	1.08901	2.26644	3.3816	1.3412	0.00803697
Gain	chr13	34335427	34337220	1.46274	1.56982	1.20159	3.28322	5.88087	3.01946	1.4321	0.00865168
Gain	chr13	44844779	44855605	5.81448	5.30983	4.75846	6.76457	11.5383	14.7708	1.12271	0.00953388
Gain	chr13	42622588	42624124	2.04878	1.95564	2.73488	3.78509	5.77217	4.28417	1.23148	0.0106717
Gain	chr13	43628087	43633345	1.15764	1.09677	0.988875	2.37312	1.84982	4.89026	1.45742	0.0115065
Gain	chr13	20701492	20702491	1.57449	1.54353	2.26343	2.89677	3.49392	4.34843	1.20479	0.0124485
Gain	chr13	42224368	42227589	1.54745	1.15983	1.26281	1.40103	4.46516	2.63752	1.32139	0.0137095
Gain	chr13	35930243	35931775	0.924358	1.13052	2.39047	1.13377	5.49675	1.57226	1.73975	0.0163802
Gain	chr13	67694799	67695743	1.7772	0.888319	3.73531	1.17506	3.80602	3.33939	1.32915	0.016867
Gain	chr13	62692190	62693360	1.32216	1.3875	2.27806	4.26723	4.00753	2.77977	1.22716	0.0186828
Gain	chr13	62892946	62896168	1.62839	1.28549	2.72549	3.14573	3.49662	3.19179	1.099	0.0200743
Gain	chr13	41036438	41041806	2.6002	1.82076	1.41026	1.50171	4.65739	5.7018	1.09761	0.0210028
Gain	chr13	85475659	85477907	4.95893	2.74527	7.9315	6.63333	15.109	7.19261	1.44058	0.0214548
Gain	chr13	41025164	41029056	2.44687	1.75289	2.26334	1.24636	3.47557	7.86998	1.29272	0.0227692
Gain	chr13	50949842	50953703	1.13473	1.26212	2.49082	0.512548	2.0666	3.71886	1.14135	0.0231703
Gain	chr13	51048020	51049027	1.27563	1.47755	2.86029	0.574756	2.95646	3.45114	1.12805	0.0243663
Gain	chr13	85491052	85492655	2.045	1.62071	3.02381	3.08519	3.99347	4.27562	1.0813	0.024661
Gain	chr13	40975040	40978006	2.44991	2.04442	2.30676	1.30177	3.95995	6.34814	1.07779	0.0286626
Gain	chr13	25408577	25409833	1.50309	1.76652	1.28618	0.729762	5.17764	2.80703	1.22817	0.0302147
Gain	chr13	44991862	44992840	1.55465	1.32769	0.85323	1.47945	3.95375	3.02036	1.14065	0.0313785
Gain	chr13	28271157	28272012	2.02329	1.70828	0.944353	1.12803	4.20174	4.15104	1.08916	0.0320038
Gain	chr13	73573679	73575085	3.41307	2.38653	3.08332	2.52206	7.42538	5.77495	1.08854	0.0360808
Gain	chr13	42268413	42269551	1.75097	0.998538	2.69692	2.09819	4.1502	2.77061	1.21911	0.0364617
Gain	chr13	49879918	49881101	1.5736	1.16643	0.955839	3.69028	3.32705	2.89616	1.10382	0.03669
Gain	chr13	86379691	86380882	4.24883	2.74883	4.74712	5.85267	9.54058	6.79573	1.12384	0.0403958
Gain	chr13	21451327	21451993	1.2983	1.25856	1.37354	1.62862	2.67049	2.98029	1.10747	0.0447387
Gain	chr13	44832287	44835728	4.00255	3.28855	4.7597	5.63869	5.75215	10.9803	1.06644	0.0452365
Gain	chr13	43612783	43620718	2.82056	3.15289	2.87926	6.88968	4.62276	8.60106	1.0262	0.0459992
Gain	chr13	52218883	52220109	1.79648	1.14762	1.58116	0.8263	3.01503	3.62496	1.05727	0.0496535
Gain	chr13	76049277	76050373	1.19606	1.87606	1.47378	3.27878	3.90316	3.08054	1.06537	0.0496535
Gain	chrX	102509168	102510388	0.150443	0.0887122	1.89788	2.0759	2.74931	4.02944	4.98898	2.17406e-17
Gain	chrX	64416579	64417694	0.188111	0.194118	0.193158	0.324459	1.9337	2.67185	3.65414	4.01829e-11
Gain	chrX	49086922	49087629	0.370642	0.458973	0.304469	2.82994	4.54787	3.65002	3.40128	2.20526e-10
Gain	chrX	16135890	16145532	0.936127	1.098	0.776819	0.593293	6.87712	4.88821	2.44195	1.05607e-08
Gain	chrX	16150964	16152667	0.338799	0.317833	0.300449	0.0708326	1.99012	2.23109	2.63299	2.43492e-08
Gain	chrX	16129390	16134412	0.78364	0.959613	1.3733	0.403691	4.56904	4.11581	2.20631	6.22023e-08
Gain	chrX	103189219	103190911	0.4495	0.527832	0.397896	0.712928	2.32677	3.34636	2.47237	9.47547e-08
Gain	chrX	9130335	9135399	0.65798	0.31009	5.06459	0.386045	2.31968	6.72594	3.0925	1.00627e-06
Gain	chrX	115074770	115075349	0.633415	0.373509	0.278747	0.665924	4.3113	2.35629	2.86808	2.08783e-06
Gain	chrX	16095303	16096479	0.490495	0.80525	0.641016	0.287134	3.34684	2.61782	2.12743	1.93159e-05
Gain	chrX	46794783	46796006	0.72893	0.486721	0.770502	0.986101	2.93847	2.23309	1.99002	9.76533e-05
Gain	chrX	64253994	64256666	2.07144	2.61372	3.00403	5.00315	6.36899	8.95204	1.59639	0.000192988
Gain	chrX	115061809	115067830	1.14169	0.935323	0.850159	1.04624	3.82245	3.04104	1.63166	0.000201578
Gain	chrX	16155103	16155953	0.709229	0.859159	0.474951	0.340396	3.54214	2.5111	1.89347	0.000254619
Gain	chrX	7130811	7132862	1.06142	0.778599	0.564648	0.858773	2.70427	3.36637	1.626	0.000364037
Gain	chrX	15994321	15996488	0.835177	1.1866	0.957014	0.26723	7.82094	2.53296	2.289	0.000385691
Gain	chrX	7133345	7146019	3.06617	2.68764	1.48599	1.90071	8.0048	8.90222	1.44046	0.000410927
Gain	chrX	69393552	69398568	1.96667	2.47747	1.05806	1.95832	10.3234	5.666	1.75762	0.00043396
Gain	chrX	51138603	51141856	2.08061	1.53123	0.637618	7.43332	5.02127	6.25405	1.53459	0.000480019
Gain	chrX	7120419	7124259	2.52782	1.98108	1.75381	1.99227	5.87698	6.95439	1.3904	0.0012462
Gain	chrX	46443694	46444538	0.714265	0.0961399	0.127553	2.71394	3.28353	1.70556	2.55102	0.00125129
Gain	chrX	96652686	96655107	0.790928	0.737919	0.956778	0.916952	3.42259	1.78513	1.67543	0.00160581
Gain	chrX	115022012	115024838	0.94681	0.756729	0.686268	0.623347	2.39912	2.46988	1.39925	0.00198689
Gain	chrX	49613374	49615859	1.31946	1.99338	0.737046	0.407832	4.6848	4.71776	1.40176	0.00209254
Gain	chrX	46038939	46040652	0.826745	0.884741	0.220092	0.394348	5.91554	1.66718	2.088	0.00263054
Gain	chrX	64195236	64196247	0.959422	1.73929	1.81057	1.66975	3.48634	4.83705	1.52182	0.00288875
Gain	chrX	69674914	69675673	1.38113	1.3896	2.30455	14.3568	5.99448	3.13872	1.66822	0.00302607
Gain	chrX	46420953	46422498	1.17119	0.840758	0.66231	2.15478	3.70016	2.47518	1.49483	0.00363761
Gain	chrX	46431953	46435808	1.40871	0.891879	0.789639	3.13641	3.63328	2.93203	1.399	0.00418965
Gain	chrX	143280386	143281483	0.860377	0.369937	1.00616	1.71485	3.05729	1.65202	1.96046	0.00426799
Gain	chrX	40653506	40654059	1.13682	0.782077	0.486382	0.827898	3.21519	3.00511	1.56368	0.00464466
Gain	chrX	16006198	16008472	0.63441	1.23792	1.29102	0.318326	5.2247	1.9114	1.89368	0.00472771
Gain	chrX	96612082	96613236	1.56767	1.05504	1.70305	2.40352	5.13071	2.94736	1.50951	0.00665358
Gain	chrX	69389669	69393266	1.18152	1.03109	0.524232	1.06006	5.57891	1.93371	1.69074	0.00841818
Gain	chrX	46771725	46773191	1.87823	2.28892	3.56335	5.47958	4.22631	6.16547	1.20409	0.010751
Gain	chrX	71462866	71464052	1.28223	1.25473	1.38473	1.70829	3.3475	2.90977	1.21076	0.0150917
Gain	chrX	47793816	47797191	3.84761	2.95178	4.2302	4.34029	7.27495	8.65565	1.11046	0.0151522
Gain	chrX	115012203	115017305	2.59175	2.12263	1.57882	3.458	5.22908	5.58025	1.08339	0.0159779
Gain	chrX	70856191	70858344	1.43756	1.4206	1.21343	1.37845	3.81662	2.89549	1.16137	0.0171904
Gain	chrX	7148100	7150520	1.38741	0.973114	0.690055	1.0669	3.18347	2.58643	1.19337	0.0177935
Gain	chrX	19742780	19743164	1.15872	0.844033	1.32978	1.37941	3.29196	2.25893	1.49316	0.02245
Gain	chrX	46445441	46449566	2.04157	0.971341	1.09062	4.03109	3.96007	3.78203	1.25133	0.0255077
Gain	chrX	154492560	154494244	1.15245	1.57494	1.07143	3.09447	2.82571	3.3475	1.08852	0.0256282
Gain	chrX	48494928	48496030	1.37988	0.662868	0.537445	1.05051	2.76393	2.5907	1.2823	0.0279796
Gain	chrX	153267757	153268161	1.49026	0.73549	0.266129	1.13248	3.38313	2.76091	1.39294	0.0314609
Gain	chrX	96777796	96778329	1.27768	1.11563	1.36242	0.768494	4.55439	2.14048	1.39229	0.0342924
Gain	chrX	106360984	106362183	3.43326	1.35397	4.55829	8.36845	5.85175	7.04032	1.28574	0.0349243
Gain	chrX	96591645	96595477	1.40347	1.20102	1.64499	1.81379	3.08314	2.60605	1.01393	0.0349687
Gain	chrX	51142337	51143566	1.04539	1.01273	0.525767	5.22047	2.5621	2.06058	1.11157	0.0357643
Gain	chrX	46838456	46839126	1.48611	1.12999	1.04409	0.647564	3.31821	2.74034	1.17029	0.0387568
Gain	chrX	7125986	7127118	1.59811	0.812621	1.18912	1.19314	2.69075	3.37742	1.1809	0.0396885
Gain	chrX	96619152	96619838	1.3751	0.906588	2.27488	1.61634	2.94177	2.53184	1.18378	0.0425689
Gain	chrX	100672514	100674168	2.86992	3.17426	0.244219	7.65762	4.28436	11.0053	1.20743	0.0426885
Gain	chrX	56791179	56792579	1.7794	1.6236	1.73098	0.93044	4.00976	3.45853	1.01095	0.043508
Gain	chrX	49643627	49644371	1.26805	0.872357	0.831876	1.03688	3.26449	1.93449	1.24562	0.043839
Gain	chrX	80376598	80376926	1.67499	0.329233	0.737112	0.366866	3.33171	2.49237	1.56152	0.0455335
Gain	chrX	57313173	57314007	1.25708	2.36742	3.48517	3.67155	4.59457	3.83882	1.12501	0.0476808
Gain	chr4	183837569	183839355	0.558017	0.439453	1.88483	2.58013	10.236	7.21668	4.06722	2.17406e-17
Gain	chr4	148859295	148866768	1.21482	1.44564	1.97567	0.545841	7.49338	9.7378	2.58344	6.84841e-11
Gain	chr4	184643635	184644268	0.289733	0.256272	0.382508	3.57908	5.29481	2.74349	4.01707	2.83647e-10
Gain	chr4	81910444	81913369	0.932712	0.999513	2.72587	1.02301	5.01052	6.42011	2.46718	1.37807e-09
Gain	chr4	81959175	81961830	0.780526	0.693298	1.94787	0.654391	4.11411	4.81808	2.48968	1.83228e-09
Gain	chr4	8820036	8820659	0.168215	0.303775	0.302274	0.889766	4.17198	1.99104	3.91581	1.08849e-08
Gain	chr4	86116766	86118119	0.736467	0.499989	0.358213	0.196113	4.68022	3.37671	2.62983	6.35017e-08
Gain	chr4	32023134	32024819	0.622574	0.385472	1.19865	1.74677	5.64807	2.69705	2.99605	7.78194e-08
Gain	chr4	113066371	113069323	1.8928	1.53141	0.729984	1.00548	6.91347	12.361	2.36163	1.7582e-07
Gain	chr4	86339546	86345711	0.978842	0.48309	0.974515	0.606822	6.27752	4.05002	2.71568	2.50092e-07
Gain	chr4	148904196	148909697	1.83147	2.83	3.64367	0.925752	9.34487	13.237	2.162	6.4839e-07
Gain	chr4	32004123	32004883	0.620692	0.17792	1.45173	1.39573	3.28588	2.74277	2.85869	6.62836e-07
Gain	chr4	86502529	86506553	1.34956	0.908253	1.46611	1.60132	5.98277	5.05607	2.19764	7.65003e-07
Gain	chr4	148854775	148857454	0.352498	0.626464	0.834508	0.369302	2.07059	3.04112	2.30028	1.65041e-06
Gain	chr4	86598440	86603744	1.17728	0.775885	2.36186	2.09317	3.8548	4.9509	2.06321	3.52699e-06
Gain	chr4	116075307	116076464	0.453221	0.467693	1.9546	1.50092	2.95804	2.10287	2.32577	4.23709e-06
Gain	chr4	148871714	148872662	1.07842	1.22699	1.93077	0.635926	6.96633	4.24173	2.22129	7.38417e-06
Gain	chr4	86604826	86615084	1.03595	0.752279	1.30801	1.37652	3.03509	4.50024	1.95077	8.70188e-06
Gain	chr4	86559014	86564278	1.08654	0.761206	1.17199	1.81564	3.18795	4.32779	1.89998	1.54485e-05
Gain	chr4	176460873	176463045	0.640036	0.859861	0.682009	0.610992	6.58915	2.49282	2.55433	1.71208e-05
Gain	chr4	148928430	148930039	0.831252	1.16055	1.57322	0.449809	3.53179	4.33686	1.8802	2.52707e-05
Gain	chr4	86427181	86432113	1.02136	0.653243	0.950441	1.76167	3.32612	3.25903	1.86185	3.2116e-05
Gain	chr4	15151025	15152020	1.18561	0.870021	0.64929	0.848284	4.12701	3.89188	1.92551	3.72625e-05
Gain	chr4	54825732	54832993	0.516735	0.395265	0.512047	0.342384	1.23583	9.60806	3.42461	5.04903e-05
Gain	chr4	86848040	86851450	1.19245	0.778007	0.60827	2.51942	3.1131	4.95361	1.9104	5.2049e-05
Gain	chr4	83719577	83720461	0.800588	0.795553	0.70028	2.70038	2.82548	3.56579	1.9428	5.44932e-05
Gain	chr4	86464164	86466738	1.121	0.557362	1.48593	1.79993	4.42976	3.19408	2.08306	5.73527e-05
Gain	chr4	81972872	81973772	0.669872	0.721316	1.40559	0.589428	2.66125	2.92332	1.94564	7.27563e-05
Gain	chr4	176457431	176458874	0.999503	1.2002	1.90336	0.869299	3.34476	4.54288	1.7767	7.38907e-05
Gain	chr4	54875531	54889902	1.80944	1.88795	2.36983	2.87722	4.78586	14.9674	2.27673	7.46042e-05
Gain	chr4	76860603	76862644	2.50592	1.88309	2.48079	5.59163	9.00807	6.97258	1.77211	8.14817e-05
Gain	chr4	81286827	81288008	0.48842	0.778934	1.68695	0.65353	2.08655	3.36354	1.9946	0.000114619
Gain	chr4	146418883	146426404	1.59779	1.56601	1.33617	1.3928	4.00284	10.3595	2.04741	0.000115005
Gain	chr4	86661077	86672260	2.24545	1.11136	2.25751	3.21388	6.12556	7.48512	1.89915	0.000158517
Gain	chr4	81923907	81926088	1.93624	1.41478	3.32188	1.73691	5.11771	6.2519	1.6427	0.000182019
Gain	chr4	15810339	15811364	1.22767	1.79474	4.07072	0.917593	5.84257	4.60152	1.7515	0.000188286
Gain	chr4	81407327	81408792	1.2709	1.1083	2.46296	2.19003	5.07036	3.44078	1.7923	0.000207492
Gain	chr4	60418028	60423792	1.5795	2.32982	5.18345	0.636469	5.37728	7.58592	1.61332	0.000267671
Gain	chr4	32495260	32496284	1.02406	0.396284	2.20822	1.71922	2.84059	2.95754	1.93098	0.00045956
Gain	chr4	86486387	86488417	1.12408	0.653319	1.08791	1.61645	3.06955	3.14426	1.68228	0.000485305
Gain	chr4	81651271	81652916	0.717416	0.279678	0.736664	0.439971	3.14239	1.66057	2.201	0.000501154
Gain	chr4	81732490	81733982	0.790936	0.616678	0.8663	0.485059	3.39559	2.11368	1.82639	0.000501543
Gain	chr4	88439981	88454335	1.50082	0.916795	0.662611	0.625565	15.9375	2.75572	2.87664	0.000518799
Gain	chr4	148987929	148991481	0.782887	1.31853	2.58611	0.659036	3.72139	3.16809	1.61004	0.000635822
Gain	chr4	86589113	86590618	1.08033	0.575392	1.30613	1.68305	2.45647	3.67938	1.78315	0.000637907
Gain	chr4	86522834	86533474	4.62142	2.89346	3.97815	8.26663	11.1605	12.7125	1.54943	0.000669754
Gain	chr4	128702827	128706432	3.1874	3.94251	3.31775	8.76957	11.0761	9.66089	1.44169	0.00068604
Gain	chr4	86590979	86596326	1.57017	0.794964	1.38053	3.5027	3.84943	4.52081	1.69793	0.000717456
Gain	chr4	86553144	86554737	1.08654	0.71351	1.58901	1.27211	2.72916	3.24242	1.59505	0.000903093
Gain	chr4	113071101	113072484	0.701543	0.880472	0.661957	0.418608	2.15326	2.94444	1.59048	0.0009221
Gain	chr4	86469293	86470247	1.18155	0.793951	1.10039	2.12329	2.61838	3.95489	1.67148	0.000961611
Gain	chr4	86759126	86760324	1.11619	0.383945	0.719147	3.48305	3.11401	3.00499	1.9259	0.000997731
Gain	chr4	116213247	116214903	0.997715	1.0786	2.91083	2.66601	5.02339	2.50431	1.77515	0.00105342
Gain	chr4	47838857	47839404	0.718289	1.08713	1.03258	1.54177	3.87547	2.76595	1.8524	0.00108405
Gain	chr4	86500129	86501008	0.924416	0.892389	1.25542	1.20699	3.26971	2.82366	1.62532	0.00112653
Gain	chr4	149070397	149078366	1.18531	2.10655	2.73174	1.051	4.78355	5.24088	1.51752	0.00116044
Gain	chr4	81913622	81914877	1.12822	0.862401	1.41593	0.768782	2.91815	3.22473	1.53938	0.00119663
Gain	chr4	56499556	56504407	1.70905	0.546946	0.888559	6.97525	4.51827	5.32607	1.99416	0.0012063
Gain	chr4	86783634	86785741	1.08302	0.372534	0.728604	0.984829	2.66493	3.19443	1.89544	0.00125167
Gain	chr4	175512123	175514914	0.657917	0.72742	0.752777	0.74356	3.85236	1.53966	1.91026	0.00127021
Gain	chr4	122617196	122618922	1.58026	1.39552	2.21556	1.76121	3.66938	5.09337	1.44858	0.00133033
Gain	chr4	120002540	120009784	1.72046	1.68195	3.09437	1.26613	3.54125	7.66538	1.59572	0.00151944
Gain	chr4	992010	994999	0.675784	1.21359	0.793046	0.896158	6.55297	2.08592	2.15642	0.00155526
Gain	chr4	6634408	6636487	2.5863	1.82265	1.63228	1.20699	6.04388	6.57043	1.41269	0.00179597
Gain	chr4	60435632	60438306	1.17719	1.49822	3.77741	0.640719	2.88119	5.55485	1.5376	0.00181386
Gain	chr4	113089226	113095864	1.47828	1.61114	0.961906	0.850836	3.08024	7.46306	1.6434	0.00190662
Gain	chr4	86889422	86890270	0.927261	0.797391	0.825188	1.70599	2.42079	3.0731	1.5666	0.00192049
Gain	chr4	86289901	86291024	1.63426	0.987772	2.13359	1.63223	3.13895	5.17302	1.57973	0.00234216
Gain	chr4	86291179	86291794	0.809397	0.835241	0.918598	1.21483	2.33551	2.98501	1.64955	0.00238432
Gain	chr4	146805864	146816677	2.34412	1.80045	1.44022	3.60511	6.92115	4.93793	1.41424	0.0023925
Gain	chr4	148930767	148985878	3.27352	6.07262	9.16389	3.20976	10.8017	19.6258	1.58381	0.00239686
Gain	chr4	86475157	86482306	4.04449	1.64749	1.16073	4.1257	10.5349	9.79679	1.71616	0.00242029
Gain	chr4	86576466	86583970	2.81121	1.25926	4.00324	4.98556	6.23467	7.46936	1.63309	0.00267779
Gain	chr4	134589068	134590321	1.31835	0.777399	2.27769	0.94326	7.75772	2.15985	2.18371	0.00271822
Gain	chr4	86643519	86659231	2.0742	1.46487	2.37336	3.5135	4.14634	5.75938	1.36461	0.00283135
Gain	chr4	109093422	109095435	2.69711	2.68912	1.71253	3.43997	6.41202	7.50134	1.27136	0.00296163
Gain	chr4	83699329	83708681	3.00207	2.5073	2.24714	8.71849	5.76823	10.1061	1.40001	0.00299427
Gain	chr4	2061170	2062465	2.28803	2.00588	2.61971	5.55065	5.41829	6.15453	1.32119	0.00308361
Gain	chr4	149066521	149069678	0.997143	1.31195	1.89421	0.596232	2.83101	3.33617	1.31158	0.00316353
Gain	chr4	86739645	86740414	1.09056	0.422017	0.699884	1.15996	2.89158	2.64617	1.75883	0.00322397
Gain	chr4	86489856	86493894	1.69572	0.630221	1.50772	2.24125	3.77398	4.43564	1.71356	0.00348037
Gain	chr4	134540431	134550805	2.26372	1.17714	4.29051	2.84326	9.77605	3.8344	1.89336	0.00348227
Gain	chr4	116153483	116156888	0.75504	1.10512	2.17558	1.53088	4.78713	1.88951	1.76889	0.00376471
Gain	chr4	176362103	176365823	1.36814	1.33177	1.81037	0.752543	4.00445	3.13858	1.30508	0.00381449
Gain	chr4	86518697	86521933	1.09441	0.769634	1.29026	1.42437	2.4762	2.67135	1.34453	0.00384519
Gain	chr4	56411551	56413970	4.9013	6.36702	7.25971	11.8704	13.8149	14.7549	1.23804	0.00391178
Gain	chr4	26781420	26784181	1.95719	1.95105	1.78531	1.56445	6.15136	4.35428	1.33618	0.0040909
Gain	chr4	40121777	40124382	2.45699	1.99511	2.36782	2.51957	5.83609	5.80681	1.26674	0.00413172
Gain	chr4	106066521	106069589	2.71051	3.18529	2.2301	7.29934	5.83738	11.0436	1.39115	0.00418965
Gain	chr4	113073489	113075126	0.977247	1.1903	0.427707	0.353696	2.50946	3.39804	1.34505	0.00439913
Gain	chr4	102044662	102051860	3.051	2.05757	1.75545	3.42027	6.52822	7.08617	1.29927	0.00447089
Gain	chr4	86515382	86516032	0.886809	0.540756	1.03478	1.22367	2.63089	2.09931	1.65323	0.0045749
Gain	chr4	86409131	86424084	6.03656	1.76739	5.18225	12.3911	14.3119	16.7095	1.85658	0.00462755
Gain	chr4	81722855	81723440	1.02996	1.43253	4.04643	0.782688	4.73479	2.7986	1.6325	0.00469691
Gain	chr4	176306559	176309517	1.85349	2.61734	3.20542	1.72135	9.63145	4.53465	1.58022	0.00498423
Gain	chr4	81402433	81403187	1.21649	0.789069	3.42619	1.63063	3.76569	2.60001	1.54913	0.00526175
Gain	chr4	86508228	86509817	1.50187	0.868585	1.44049	1.30567	4.28715	2.93802	1.50599	0.0053606
Gain	chr4	86780846	86781488	0.857032	1.13708	0.20953	1.42661	2.39726	3.36204	1.49919	0.00560804
Gain	chr4	86451206	86455707	2.06341	0.974425	1.71776	3.24401	4.45106	4.69146	1.46979	0.00577206
Gain	chr4	86395349	86404724	7.2013	1.91485	4.69305	14.3021	16.959	19.7174	1.87792	0.00611202
Gain	chr4	23293418	23294115	0.864691	1.16387	1.50555	0.657099	4.76025	2.24274	1.65456	0.00630693
Gain	chr4	81383180	81384869	1.6925	2.09905	2.88588	0.899884	5.45229	4.39622	1.2713	0.00651835
Gain	chr4	86696829	86701525	2.0839	1.02045	1.54319	2.89862	4.69654	4.44379	1.43811	0.00660643
Gain	chr4	108850693	108853970	1.00067	1.38784	1.01929	2.59219	2.15264	5.38201	1.53732	0.00673888
Gain	chr4	86704113	86705019	1.15729	0.626976	0.742711	1.14444	3.39898	2.16429	1.58219	0.00703182
Gain	chr4	109059835	109067070	2.47329	1.72521	1.17673	4.17341	5.94098	4.95521	1.27408	0.00705475
Gain	chr4	31288684	31289185	1.35912	0.593373	2.36176	0.913656	4.36706	2.52442	1.72746	0.00715387
Gain	chr4	81742374	81743672	0.868656	0.792161	1.01642	0.464583	2.13594	2.41022	1.32237	0.00716877
Gain	chr4	86424285	86425618	1.23929	0.527784	1.29274	1.33909	2.5421	2.53325	1.48218	0.00777877
Gain	chr4	86745929	86748397	1.33918	0.723872	0.502023	1.57412	2.88573	2.86826	1.36179	0.00852656
Gain	chr4	102339482	102342106	1.2296	1.1657	1.15994	0.450609	2.57069	3.33202	1.19586	0.00894719
Gain	chr4	86437152	86444627	1.93406	0.789635	1.6039	2.46047	4.2749	4.12475	1.50807	0.00896687
Gain	chr4	86786985	86788359	1.50769	0.531741	0.842661	2.72121	3.26349	3.39742	1.58947	0.00919315
Gain	chr4	109078888	109084024	1.75216	1.5129	0.975642	1.91727	3.42075	4.59041	1.16969	0.00931725
Gain	chr4	86743764	86745721	1.36702	0.788318	0.605518	1.22055	3.04404	2.86807	1.33457	0.00939908
Gain	chr4	52902470	52904916	1.57642	1.1841	0.682723	2.92992	2.93967	4.06182	1.23105	0.00975286
Gain	chr4	86762763	86765189	1.17854	0.591351	0.96591	1.61131	1.76422	4.00315	1.57759	0.0101188
Gain	chr4	116926063	116927081	0.875575	1.72734	3.59627	1.08972	4.30278	3.09688	1.44617	0.010539
Gain	chr4	86446155	86450888	0.986689	0.629221	0.961935	1.47878	1.77276	2.38824	1.24562	0.0118402
Gain	chr4	149080481	149082320	0.912747	2.31058	4.43723	0.419822	3.74189	6.077	1.49293	0.0118484
Gain	chr4	86405940	86408299	1.43439	0.596665	1.34728	1.62636	2.69969	3.3166	1.45014	0.0121243
Gain	chr4	8160753	8166755	1.63927	1.90363	1.08177	2.14736	3.37235	5.22793	1.15866	0.0123673
Gain	chr4	52718769	52721465	1.5957	1.50608	1.29882	2.14814	4.86442	3.07723	1.25894	0.012518
Gain	chr4	26331986	26333318	1.90955	1.27982	0.970282	2.62585	3.67468	4.49243	1.24176	0.0126788
Gain	chr4	63411888	63414978	2.27522	2.02373	2.92905	2.63968	6.44966	4.3008	1.22309	0.0129981
Gain	chr4	86564772	86565667	1.08363	0.816009	1.44351	1.91286	2.21734	2.60684	1.29465	0.0148857
Gain	chr4	86760755	86762639	1.12762	0.617726	0.628968	1.72884	1.98074	2.83414	1.3152	0.0152095
Gain	chr4	86467088	86468988	1.39421	0.555548	1.14813	2.64128	2.82899	3.04557	1.44995	0.0163291
Gain	chr4	42633612	42653162	3.17432	5.31311	1.29553	1.40757	10.2319	9.98071	1.15113	0.0165056
Gain	chr4	176352075	176353947	1.0788	1.12771	1.1509	0.708855	2.39578	2.78597	1.13508	0.0166808
Gain	chr4	102199507	102202057	1.50186	1.23136	0.823894	1.04091	3.89404	2.7858	1.1941	0.0169545
Gain	chr4	166133866	166138355	2.11568	1.86962	1.4403	2.13441	4.22646	4.82575	1.05995	0.0172703
Gain	chr4	26610051	26610572	1.00542	1.19315	0.567818	0.971139	3.93726	2.28489	1.44565	0.017881
Gain	chr4	102090845	102091890	1.22929	1.55331	0.90162	1.63855	4.55194	2.73188	1.2917	0.0183994
Gain	chr4	38664722	38665829	1.51575	1.58859	1.79961	1.74294	2.87512	4.66464	1.19481	0.0184608
Gain	chr4	55000163	55003072	1.00096	1.20043	0.851887	0.439659	1.65974	5.04649	1.46875	0.018636
Gain	chr4	15795234	15805273	1.58913	3.35795	6.55389	1.02185	7.00777	5.79131	1.27873	0.0187186
Gain	chr4	77134569	77135633	1.79871	2.84779	2.4542	4.21596	5.04967	6.08956	1.17165	0.0188964
Gain	chr4	176326263	176327803	1.80506	1.21251	2.93761	1.53517	3.20091	4.25693	1.19048	0.0188996
Gain	chr4	32520658	32521609	1.24041	0.341337	3.4248	2.86533	2.51869	2.68841	1.58579	0.0193729
Gain	chr4	31670312	31671359	0.901425	1.42115	1.54268	0.460682	6.40631	1.77826	1.7546	0.0201158
Gain	chr4	23349385	23351480	1.70269	0.684737	1.0156	0.610404	6.89659	2.06278	1.83024	0.0221711
Gain	chr4	86618566	86641354	5.44083	4.071	8.1928	9.37985	8.58571	14.3131	1.13615	0.0223236
Gain	chr4	86433784	86436718	2.07428	0.793468	1.10169	2.96915	4.38827	3.9029	1.40661	0.0225348
Gain	chr4	48900246	48902388	6.34302	6.25493	6.12342	5.76741	13.3468	14.0416	1.00183	0.0232114
Gain	chr4	15805770	15806650	0.982939	1.22948	2.93618	0.68501	2.95495	2.5102	1.2143	0.0235197
Gain	chr4	175754255	175754679	0.370468	1.9752	2.53605	0.227198	4.67468	2.74792	1.72104	0.0272497
Gain	chr4	81421314	81422480	1.7989	1.80993	2.77075	3.08211	5.07795	3.40678	1.15184	0.0276452
Gain	chr4	149057308	149063621	1.30917	2.05862	3.00865	1.0208	3.75418	3.78193	1.06491	0.0279814
Gain	chr4	176356394	176358342	1.03673	2.23693	2.2397	1.22619	3.9017	4.07974	1.19532	0.0305707
Gain	chr4	149082606	149087900	0.862327	1.86666	4.48838	0.44222	2.38712	5.09634	1.33141	0.031254
Gain	chr4	119961465	119964781	1.26579	1.38785	1.81153	0.771424	1.95177	5.02657	1.26651	0.031642
Gain	chr4	102246013	102252833	3.87409	2.6996	1.0429	5.75093	7.54786	6.98707	1.03529	0.032856
Gain	chr4	176996283	176997296	1.73391	0.507405	0.98322	0.642774	3.20922	3.30819	1.43922	0.03498
Gain	chr4	81382554	81382948	1.52799	0.959776	2.38758	1.22227	4.76956	2.32755	1.43352	0.0349993
Gain	chr4	6593313	6593764	1.91586	0.898653	1.07305	2.56351	4.09231	3.40838	1.31312	0.0360111
Gain	chr4	103228648	103229965	1.15478	2.01349	1.12443	1.1905	3.24869	4.09109	1.09995	0.0369841
Gain	chr4	102209786	102210219	1.39068	1.43508	1.17964	1.94675	3.63062	3.49249	1.20231	0.0376852
Gain	chr4	26370866	26378269	2.4278	1.60194	0.767897	4.95576	5.2325	3.97021	1.07996	0.0377277
Gain	chr4	81513297	81514728	1.86916	1.60737	4.87353	3.94462	3.75552	3.71335	1.004	0.0412914
Gain	chr4	26353475	26353998	1.05166	1.03357	0.771342	1.28991	3.3339	1.84939	1.30434	0.045233
Gain	chr4	130948420	130951067	2.22973	2.14754	2.05551	2.15143	7.32169	3.31247	1.20469	0.0468213
Gain	chr4	6600282	6601273	1.42847	1.47408	1.05935	2.48211	3.24586	3.18117	1.01885	0.0480177
Gain	chr4	108983129	108983773	1.22053	1.04959	1.00263	1.19763	3.18643	2.19589	1.17968	0.0497584
Gain	chr4	39466131	39467418	1.65028	2.10244	1.86192	1.83672	3.19138	5.03523	1.02194	0.0499268
Gain	chrY	15815376	15816803	0.183764	0.0379263	0	7.7423	3.31027	7.18649	5.66941	2.86962e-17
Gain	chrY	21154701	21155057	1.54362	0.834379	3.24554	0.879039	11.0342	11.1364	3.18594	1.67802e-09
Gain	chrY	5307433	5308942	0.712517	0.340734	0	2.07826	4.71845	3.32406	2.99069	1.40873e-08
Gain	chrY	7660091	7661445	0.251763	0.359726	0	0.285045	2.78078	1.76046	2.89159	9.12235e-08
Gain	chrY	23862089	23864717	0.648801	0.473812	0	0.110185	2.12378	2.91108	2.07007	4.28555e-06
Gain	chrY	9091566	9097982	0.531618	0.350256	0	0.846415	5.53554	1.21588	2.87913	0.000138269
Gain	chrY	5599091	5601890	1.3027	1.18956	0	3.53475	3.97593	3.64736	1.5777	0.000259501
Gain	chrY	5594027	5596017	1.1862	1.15608	0.0270674	2.44914	5.14414	3.07014	1.76713	0.000339905
Gain	chrY	23897855	23898413	0.657211	0.484426	0	0.215919	2.81877	2.26701	2.06517	0.000365698
Gain	chrY	23882099	23884639	1.04305	0.287739	0	0.161502	2.50739	3.29549	1.96475	0.0020287
Gain	chrY	7590440	7603416	1.9898	2.8755	0.00415282	1.56256	5.28977	8.42506	1.37535	0.0032223
Gain	chrY	7319907	7323559	3.18949	2.42403	0	0.647604	8.12047	6.76132	1.30083	0.00447085
Gain	chrY	3903566	3905139	1.45045	1.72042	0.0684766	1.74837	5.65825	3.33098	1.40329	0.00690901
Gain	chrY	5596300	5597620	1.1323	0.942962	0.0407957	1.66292	3.18945	2.33246	1.29551	0.0138665
Gain	chr5	131536924	131545046	0.710714	0.880089	0.40138	0.404162	6.4013	7.75454	3.04414	1.91918e-14
Gain	chr5	22540344	22544949	0.734944	0.523245	1.38647	0.607949	8.87217	4.01369	3.27497	2.44418e-09
Gain	chr5	19264205	19268601	0.51922	0.849888	6.64293	0.510575	5.63242	3.83714	2.69365	1.23261e-08
Gain	chr5	108260330	108261243	0.287106	0.681429	0.884427	0.581044	3.33547	3.91481	2.89457	2.49155e-08
Gain	chr5	108461164	108462574	0.520738	0.594941	0.553806	0.650114	4.58826	2.85287	2.66417	9.15493e-08
Gain	chr5	65892218	65894360	0.342866	0.164271	0.817294	0.495637	1.34267	3.22342	3.09005	2.57304e-07
Gain	chr5	23084520	23085484	0.326319	0.729601	0.614303	0.500306	4.65004	3.01268	2.82339	3.55604e-07
Gain	chr5	134403105	134404025	0.427386	0.441033	1.66764	1.38915	2.82662	2.40118	2.59128	4.81987e-07
Gain	chr5	102593961	102595719	0.969697	0.32329	0.781252	3.48579	4.94631	4.33678	2.75192	1.3304e-06
Gain	chr5	19179868	19180607	0.673768	0.182969	1.4201	0.130485	3.79573	2.61913	2.95155	1.75166e-06
Gain	chr5	180470643	180475657	2.29711	2.25707	4.99151	4.10111	16.1196	9.06724	2.27075	1.86404e-06
Gain	chr5	131628499	131630030	2.36379	1.50245	3.37699	3.73441	7.75861	11.5807	2.20861	2.05052e-06
Gain	chr5	49594985	49597807	1.14336	0.815356	1.70856	1.03468	4.5745	4.16337	2.05662	2.27212e-06
Gain	chr5	108017249	108017645	0.594895	0.545681	2.85066	0.912081	4.65925	3.00431	2.84637	3.07192e-06
Gain	chr5	131524097	131526942	0.507126	0.608954	0.681686	0.262942	1.91371	4.43531	2.39286	4.44926e-06
Gain	chr5	135407999	135410822	1.17083	0.805478	0.438915	1.00012	3.89362	4.74263	2.005	4.74612e-06
Gain	chr5	138902913	138908335	1.31135	1.1385	1.92291	4.13087	7.53553	4.26126	2.18321	5.72384e-06
Gain	chr5	32537584	32541134	0.66509	0.480429	1.67698	1.74029	4.49519	2.10625	2.46435	6.62901e-06
Gain	chr5	22702514	22705084	0.867572	0.737284	1.0271	0.507019	4.76973	2.85111	2.15928	1.12676e-05
Gain	chr5	81314212	81314999	0.632726	0.549836	1.50457	0.94966	3.21676	2.64879	2.25661	1.22536e-05
Gain	chr5	133799620	133802780	2.27465	3.07545	2.24191	4.01693	10.8365	9.62956	1.82897	1.25342e-05
Gain	chr5	65920156	65921389	0.637962	0.482777	0.917109	0.117373	2.02638	3.08085	2.15511	1.44218e-05
Gain	chr5	28696	32524	2.35755	1.40737	1.80857	5.81271	6.14589	12.7843	2.21759	2.30838e-05
Gain	chr5	58422513	58423565	1.22111	0.617194	4.7852	0.985764	4.81445	3.7992	2.13123	2.51044e-05
Gain	chr5	137827757	137829038	0.962051	0.739297	0.90379	2.03361	2.72537	5.13633	2.08316	2.80171e-05
Gain	chr5	138910770	138911346	0.500271	0.469314	0.513693	0.25102	2.9683	2.32548	2.3382	3.03105e-05
Gain	chr5	19269125	19271851	0.442651	1.6484	10.9383	0.938325	6.59458	6.43301	2.5657	3.55366e-05
Gain	chr5	141391813	141393940	3.69946	3.48673	4.92567	7.2147	11.2839	12.4825	1.6156	6.17399e-05
Gain	chr5	60585135	60585634	0.419864	0.9207	1.40117	1.40011	5.00111	2.7333	2.4749	7.50266e-05
Gain	chr5	64330711	64332370	1.83374	1.28872	2.53223	4.36261	7.16035	5.08939	1.87436	7.81303e-05
Gain	chr5	138288677	138289909	0.510783	0.702791	0.546341	0.743966	2.38918	2.55938	1.89487	8.1285e-05
Gain	chr5	10695362	10705722	2.09202	2.57439	3.087	3.45985	7.81223	7.28586	1.59142	8.98012e-05
Gain	chr5	19728350	19729140	0.563976	1.43784	1.39667	0.91554	5.45641	3.64398	2.1749	0.000151113
Gain	chr5	60477969	60479048	0.947609	0.92772	1.32233	0.447032	2.75936	3.9573	1.77453	0.000175855
Gain	chr5	95996559	95998564	1.79217	2.14637	2.31039	4.81351	7.68413	5.63605	1.6708	0.000194421
Gain	chr5	171569662	171570743	0.582066	0.700761	0.871621	1.11552	2.69095	2.02092	1.85763	0.000282778
Gain	chr5	158279539	158286763	1.56178	1.19936	0.906266	2.56934	4.47556	4.21989	1.54248	0.00029739
Gain	chr5	19726472	19727530	0.867282	1.53424	0.865107	0.569871	5.33705	3.75421	1.81996	0.000394819
Gain	chr5	141403799	141405112	2.87578	2.53483	3.56813	8.02821	8.23768	7.96125	1.48551	0.000540642
Gain	chr5	76380842	76384118	6.47829	5.49521	8.92977	12.5229	14.8118	21.4815	1.48021	0.000612394
Gain	chr5	158218166	158219024	0.641527	0.693535	0.439159	0.814962	2.71162	2.28522	1.77885	0.000622386
Gain	chr5	81468727	81471438	2.75768	2.57614	3.32845	2.39439	7.38889	7.95289	1.41513	0.000652
Gain	chr5	90575619	90577243	2.00243	1.68309	1.80742	2.30256	8.66366	4.63323	1.76398	0.000669754
Gain	chr5	127311743	127313688	1.03833	0.974079	2.64471	2.29489	2.49953	4.35418	1.60816	0.000792885
Gain	chr5	158272784	158277383	1.90536	1.62476	1.33556	2.66062	4.89983	5.28834	1.40607	0.000834421
Gain	chr5	22576149	22579569	1.90234	1.72561	2.0794	1.90521	9.88274	4.23458	1.87015	0.00087583
Gain	chr5	122180207	122182320	1.63854	0.909479	0.892237	2.11251	3.2731	6.32371	1.78289	0.000941022
Gain	chr5	135416265	135417275	1.58331	0.830328	1.14605	2.10119	3.42203	5.01388	1.72025	0.00103073
Gain	chr5	158350688	158353165	1.28136	1.37692	1.26137	1.63659	4.57551	3.43944	1.48843	0.00112971
Gain	chr5	76372990	76373895	0.579282	1.04611	0.416377	2.93087	2.04164	3.70254	1.73577	0.00155526
Gain	chr5	49807875	49808929	1.61677	1.25772	2.93719	3.63812	4.35076	4.28661	1.47311	0.00166993
Gain	chr5	150501896	150506492	3.75612	5.0483	3.46418	7.9083	11.2963	11.9511	1.29907	0.00225074
Gain	chr5	175856473	175858019	1.11955	0.857719	2.14241	1.62284	2.19209	4.12798	1.56932	0.0023244
Gain	chr5	49948499	49951120	1.42116	1.73506	3.72017	1.31655	5.40855	3.64857	1.44414	0.0023929
Gain	chr5	173201489	173210871	2.75476	3.06205	3.60691	2.0839	6.39596	8.71792	1.26047	0.0031014
Gain	chr5	37671605	37673232	1.9665	1.66335	1.57238	2.56522	4.62894	5.05206	1.3129	0.00325578
Gain	chr5	43630704	43631967	1.2664	1.24257	1.74805	1.77611	4.20047	2.98807	1.42519	0.00390243
Gain	chr5	54522473	54523648	1.24959	1.51976	2.24546	2.5864	3.61183	3.84555	1.32967	0.00427308
Gain	chr5	176102852	176104844	1.22452	0.774474	0.648965	0.617726	7.6655	1.79535	2.1745	0.00469691
Gain	chr5	74819870	74820866	0.947536	0.92347	0.729719	1.79172	3.05779	2.3926	1.456	0.00482304
Gain	chr5	42993128	42995658	3.64955	5.00718	3.10869	7.13415	10.3128	11.2607	1.20571	0.0060613
Gain	chr5	180491635	180493375	1.5977	2.02201	1.33103	0.818062	5.25322	4.1818	1.28425	0.00636286
Gain	chr5	27471979	27474590	4.56112	5.18365	3.09482	7.42122	11.8945	11.7296	1.16401	0.00649048
Gain	chr5	72485578	72486053	1.15771	0.967122	0.509475	1.8257	3.59812	2.97552	1.53799	0.00724806
Gain	chr5	7857796	7858994	0.941104	0.925985	1.05625	0.523464	2.74262	2.44544	1.32802	0.00742359
Gain	chr5	131693158	131693656	0.57847	1.08535	0.755987	1.74155	2.74582	2.34041	1.59854	0.00917258
Gain	chr5	127182570	127188790	4.31523	3.11668	3.43479	11.9748	8.1547	10.385	1.19544	0.00931734
Gain	chr5	133242223	133243542	1.53075	1.18985	1.531	3.74898	4.61912	2.9366	1.37428	0.00933648
Gain	chr5	151081880	151083926	1.65371	1.26997	0.802969	4.28077	4.38426	3.18037	1.28804	0.0094421
Gain	chr5	149183827	149186881	2.78306	2.49077	2.30206	3.33453	8.28603	5.32752	1.27219	0.00988741
Gain	chr5	141395325	141396096	1.73357	1.05231	1.81499	6.62905	3.63839	3.8946	1.34216	0.0104412
Gain	chr5	6651040	6653209	2.01951	2.00912	1.22931	1.66865	5.20916	4.4887	1.16768	0.010561
Gain	chr5	90568527	90569439	1.32213	1.00843	1.35761	0.661001	5.85284	2.01398	1.73093	0.0114247
Gain	chr5	133897606	133898317	1.36367	1.25508	1.40026	1.25445	4.08933	2.96643	1.3626	0.0116229
Gain	chr5	158360800	158363976	1.39591	1.06545	0.848144	1.81599	3.70898	2.62013	1.25417	0.0120504
Gain	chr5	134393031	134394389	1.0234	0.896669	1.11034	2.36246	2.09205	2.92547	1.25302	0.0123014
Gain	chr5	133276444	133278441	1.24772	0.935175	1.05193	1.03905	4.61179	1.95254	1.53421	0.0127615
Gain	chr5	34193541	34194397	5.69535	5.11886	5.72239	6.95743	12.8703	12.1197	1.16149	0.0131296
Gain	chr5	49753870	49754818	0.8019	1.22699	1.90237	1.27185	2.52665	2.72309	1.29918	0.0134734
Gain	chr5	127179301	127182468	3.04825	2.21388	1.82869	6.75121	5.97934	6.51794	1.14099	0.0144812
Gain	chr5	139079326	139081559	1.9734	1.50306	3.67878	1.67487	3.95594	4.31562	1.14835	0.0148066
Gain	chr5	131437919	131440597	3.74179	3.38619	1.78028	3.64034	11.6098	6.73378	1.25929	0.0150758
Gain	chr5	76151379	76152537	2.17358	2.03271	2.11566	2.41606	5.02434	4.93105	1.13813	0.0152891
Gain	chr5	81149554	81150146	1.37181	0.639311	1.40862	0.529202	3.11926	2.63986	1.46678	0.0153766
Gain	chr5	43007599	43011252	4.68239	7.58134	5.57494	9.36126	12.9461	16.4227	1.15621	0.0155233
Gain	chr5	111104874	111106097	1.35066	0.907072	1.67309	3.09636	3.72206	2.31429	1.36279	0.0157259
Gain	chr5	34007322	34009640	5.14872	4.5541	4.65941	7.7343	9.86709	12.2152	1.07598	0.0158335
Gain	chr5	43105415	43106302	1.83218	0.853855	1.63858	1.7398	3.39456	3.88952	1.35426	0.0172702
Gain	chr5	177502905	177503269	1.2941	1.70637	1.55029	1.58727	4.50466	3.60809	1.38229	0.0176232
Gain	chr5	10758700	10763130	8.63464	9.82706	8.65347	13.8323	18.909	21.9209	1.02864	0.0178282
Gain	chr5	10735050	10737962	2.59442	2.20316	2.79353	3.07444	5.95009	5.04129	1.09712	0.0181612
Gain	chr5	128830178	128838422	3.45961	2.40414	2.58507	4.35072	12.2143	5.04799	1.46293	0.018636
Gain	chr5	134475780	134477613	1.17328	0.930209	1.17538	1.90854	2.96969	2.20843	1.18536	0.0216429
Gain	chr5	158329838	158332088	1.79529	1.44359	1.47237	2.87404	4.51954	3.21227	1.15855	0.021733
Gain	chr5	149539281	149540321	1.61331	1.95097	2.01897	1.71599	4.01441	4.27265	1.10464	0.0221175
Gain	chr5	158355603	158357956	1.80591	1.41494	1.30492	1.56898	3.84159	3.48339	1.08535	0.0243148
Gain	chr5	13734294	13737267	1.47355	1.44776	0.289932	0.641238	4.33072	2.682	1.15822	0.0272315
Gain	chr5	90605890	90613649	5.01835	2.96268	2.81956	4.33333	12.9645	7.59215	1.25885	0.0284085
Gain	chr5	138598462	138599642	2.79968	2.86615	2.03061	1.75785	6.03291	6.50135	1.02158	0.0284793
Gain	chr5	37737202	37739262	1.75707	1.10367	1.64733	1.54607	3.17445	3.52046	1.12664	0.0285376
Gain	chr5	139119264	139120818	1.29942	2.49026	2.33932	2.29755	4.00917	5.20933	1.17055	0.029316
Gain	chr5	94926418	94927074	1.1583	0.659468	1.64052	1.80038	2.55472	2.08014	1.30901	0.0295474
Gain	chr5	133320915	133321429	1.2229	0.946465	0.784822	2.99989	3.39216	2.21945	1.33945	0.0314609
Gain	chr5	158319856	158328495	4.38877	3.41627	2.35774	6.0042	8.92828	7.975	1.00527	0.033081
Gain	chr5	13767315	13770773	1.81316	1.97283	0.327179	0.334984	5.38718	3.30447	1.10623	0.0348733
Gain	chr5	65808841	65813447	1.36134	2.32764	4.29889	1.83917	3.42021	5.0376	1.0922	0.0362027
Gain	chr5	127145369	127148407	3.53168	2.66428	3.67077	7.36346	5.47796	8.49532	1.04637	0.03669
Gain	chr5	180300683	180301240	1.31678	1.01912	1.835	0.951746	3.19214	2.58279	1.23783	0.0389457
Gain	chr5	49849190	49850952	1.36938	1.30559	3.83626	0.985855	2.79784	2.9598	1.00639	0.0390148
Gain	chr5	108193792	108195114	1.3091	1.49418	3.46239	1.09477	2.79626	3.2868	1.015	0.04181
Gain	chr5	34205368	34206201	1.82495	1.03902	1.4539	2.22873	3.65542	2.77084	1.39534	0.0426119
Gain	chr5	104923858	104924689	0.788506	1.7901	1.06875	0.406198	4.81699	2.09059	1.41	0.046794
Gain	chr5	133927729	133928593	1.09213	1.47137	1.24604	1.08838	4.43522	1.98211	1.29061	0.046794
Gain	chr5	59829014	59833438	2.56188	2.38054	3.6719	4.28787	7.92684	3.82409	1.15215	0.0497647
Gain	chr9	103169749	103171982	0.587321	0.751532	0.747817	0.551087	3.67994	4.70492	2.55733	2.76483e-09
Gain	chr9	2471535	2476667	0.720836	0.928497	1.31762	0.855919	3.72371	5.6493	2.40563	1.81068e-08
Gain	chr9	2465544	2471263	1.52311	1.19301	2.52497	1.43066	6.49152	7.2416	2.21968	4.27999e-08
Gain	chr9	96055352	96065959	1.72173	1.69502	0.683291	2.07536	8.24386	7.23568	2.07484	1.54699e-07
Gain	chr9	96022846	96025985	1.20343	1.19874	0.446232	1.16855	5.99993	5.27826	2.13546	1.78929e-07
Gain	chr9	138371722	138372588	0.211869	0.281101	0.714819	1.58704	2.84464	1.63362	3.0799	3.19715e-07
Gain	chr9	2708219	2712072	3.00953	2.71216	3.0763	3.58902	10.8966	12.5337	1.92352	1.17187e-06
Gain	chr9	107531333	107540410	4.56147	4.14036	10.463	9.5623	16.9309	18.0654	1.89159	1.24459e-06
Gain	chr9	114936629	114937919	1.66677	1.38438	3.08903	4.39415	9.41923	6.00514	2.25544	2.04041e-06
Gain	chr9	103173496	103174448	0.715927	0.824032	1.30062	1.36783	3.52246	3.44172	2.11782	7.07788e-06
Gain	chr9	2226757	2239146	2.11796	1.87523	3.35569	2.7978	7.34294	7.43841	1.77687	7.23044e-06
Gain	chr9	2241656	2246222	3.0798	3.13663	5.01505	4.87869	10.2905	12.4377	1.75387	8.97468e-06
Gain	chr9	116363714	116366303	0.851075	1.3592	1.35248	1.37009	5.96472	4.17334	2.11357	9.03449e-06
Gain	chr9	107625118	107636039	2.12392	1.94381	2.94817	3.92752	7.09734	7.56684	1.73867	1.0278e-05
Gain	chr9	2340193	2341011	0.7049	0.66128	1.11862	1.14951	3.4296	2.85193	2.16541	1.65561e-05
Gain	chr9	96026464	96055018	5.66919	4.3879	1.74195	5.08325	18.4892	17.8649	1.74149	2.34985e-05
Gain	chr9	103188570	103190290	3.1258	2.83224	3.86726	5.84909	9.47413	11.926	1.73221	2.59109e-05
Gain	chr9	2332247	2338923	0.970743	0.811125	1.06943	1.11715	3.20636	3.16324	1.72758	2.86416e-05
Gain	chr9	2505017	2506894	0.978117	0.879576	1.32002	0.796946	3.30138	3.42688	1.76584	4.98648e-05
Gain	chr9	2663416	2664411	0.764059	0.761268	0.86572	1.11489	4.50531	2.4948	2.17756	5.35845e-05
Gain	chr9	97442856	97445470	1.54539	0.99412	0.875859	0.720038	3.86423	6.5565	1.91378	7.08351e-05
Gain	chr9	2568235	2573148	1.72487	1.09111	2.27562	0.90389	4.76798	5.60273	1.77695	7.40698e-05
Gain	chr9	2486491	2496802	3.96218	3.46896	4.54928	5.00727	10.839	13.2723	1.583	8.93767e-05
Gain	chr9	116217161	116218290	1.6488	1.77334	0.786905	1.62356	6.09299	5.69529	1.70113	9.42342e-05
Gain	chr9	2353593	2355843	1.16577	0.709767	1.60404	1.68367	4.03259	3.30058	1.84669	0.000108256
Gain	chr9	106806057	106811828	1.87309	1.28078	2.72163	3.54652	8.99676	4.71392	2.02253	0.000117213
Gain	chr9	36498681	36502126	1.63724	1.58736	2.14251	3.59364	5.78523	4.87446	1.61797	0.000128983
Gain	chr9	139651719	139652966	0.79902	0.824533	0.345456	0.967137	2.66238	3.18567	1.74562	0.000165037
Gain	chr9	97675012	97686032	2.54296	1.80841	0.911958	1.19812	6.19751	8.82459	1.66499	0.000167538
Gain	chr9	2250682	2276380	7.03646	5.34865	9.74901	12.4085	18.5819	21.1305	1.5653	0.000178475
Gain	chr9	90922999	90932021	1.85549	0.864332	2.51149	2.9643	4.41511	7.76041	2.02488	0.000222786
Gain	chr9	2320081	2322534	1.16558	1.04831	2.53644	1.84934	2.80566	4.93116	1.71199	0.000254619
Gain	chr9	2601606	2603303	0.679991	0.653861	1.03148	0.796128	2.52165	2.078	1.70399	0.000324637
Gain	chr9	133556371	133557803	1.39173	0.604704	0.413679	2.45946	3.29872	5.35805	1.99205	0.000367325
Gain	chr9	34457638	34458603	2.44486	3.81242	3.48674	5.77255	10.5316	9.64604	1.59913	0.000463074
Gain	chr9	116141587	116143914	1.02576	0.721187	1.09958	0.331818	3.22236	2.70043	1.64163	0.000498743
Gain	chr9	2655268	2658651	3.24917	1.91252	2.8984	2.28272	7.45007	10.4048	1.6602	0.000620076
Gain	chr9	2477001	2478185	0.863644	0.799814	1.15968	0.427793	2.19689	3.43891	1.66008	0.000780485
Gain	chr9	131126834	131127902	1.96382	0.734614	2.72228	1.30973	4.64626	6.41543	1.92556	0.000801931
Gain	chr9	136710204	136710616	0.826003	0.524541	0.130487	0.642947	3.15171	2.76759	1.99743	0.000872193
Gain	chr9	106789532	106790252	1.12827	0.638488	1.98074	1.67405	5.41605	2.30905	2.0696	0.00103337
Gain	chr9	2281866	2300446	6.68712	6.14282	8.70535	11.5781	16.8404	18.1296	1.33163	0.00109683
Gain	chr9	95833107	95835994	2.01718	1.28458	2.31388	2.74999	4.99342	5.09353	1.49864	0.00126361
Gain	chr9	2725642	2729715	2.39613	2.3397	3.39961	2.48271	5.35589	8.65478	1.43756	0.00130369
Gain	chr9	126448940	126450237	0.909759	0.917946	1.10024	1.5622	3.32513	2.41207	1.58904	0.00136409
Gain	chr9	2239675	2240644	1.10918	1.06084	1.11116	0.74659	3.95512	2.89469	1.58004	0.00140087
Gain	chr9	90944441	90945191	0.908494	0.64904	2.00926	1.67146	2.73668	2.54768	1.71616	0.0014147
Gain	chr9	97791393	97795948	2.18871	2.30615	1.06457	0.747082	5.62382	6.3593	1.30779	0.00160629
Gain	chr9	90964624	90965420	1.11946	0.61158	1.45377	0.787495	3.73916	2.52535	1.77312	0.00161385
Gain	chr9	100954898	100955362	0.790066	0.873529	2.25995	3.37437	3.60958	2.40466	1.80495	0.00191279
Gain	chr9	36502692	36504640	1.62915	1.79233	2.0185	1.94456	5.09682	4.43672	1.37152	0.00192259
Gain	chr9	95894578	95897463	2.45502	2.85244	1.35381	2.81045	11.2281	5.87196	1.59821	0.00203887
Gain	chr9	2451878	2453976	1.35021	0.967582	0.744565	0.931548	3.78607	3.12526	1.46526	0.00211726
Gain	chr9	8055848	8057916	1.0527	0.510438	1.4977	0.548366	2.36749	2.87033	1.61005	0.00217253
Gain	chr9	90901458	90902551	1.17535	0.519806	1.52708	1.50046	2.91192	2.97542	1.67744	0.00234235
Gain	chr9	2454001	2454960	0.601367	1.01548	0.870117	0.85495	2.60474	2.38128	1.57466	0.00254419
Gain	chr9	107541433	107543248	1.01151	1.08854	1.66184	1.27611	2.84822	2.92815	1.35688	0.00278001
Gain	chr9	2703904	2705775	1.45786	0.998119	1.54016	1.17346	3.40346	3.67679	1.40532	0.00281983
Gain	chr9	108266014	108266845	1.48239	1.39954	0.582957	0.812395	4.36411	3.88253	1.44387	0.00291096
Gain	chr9	127495099	127499865	2.88453	2.61307	1.85968	3.92455	5.50423	10.1228	1.37717	0.00403259
Gain	chr9	107662834	107664206	1.2232	0.769189	1.4719	1.95157	3.41793	2.62417	1.48722	0.00428713
Gain	chr9	128661775	128670418	2.71401	2.12086	1.00687	4.88157	6.37609	6.05394	1.25286	0.00437082
Gain	chr9	2389806	2390319	0.867909	1.10636	1.20573	1.4559	3.33212	2.75554	1.58881	0.00463784
Gain	chr9	128600646	128605572	2.62042	2.19845	1.09379	4.91908	6.39615	5.83506	1.23454	0.00486385
Gain	chr9	123509011	123512319	1.91914	1.43212	1.46576	2.09372	3.9751	4.73835	1.2506	0.00583308
Gain	chr9	15592952	15594001	0.899708	1.0316	1.2318	0.574756	2.8382	2.48482	1.37832	0.0061455
Gain	chr9	95867644	95868637	1.63679	1.00799	0.704813	1.01999	5.10022	2.99978	1.53949	0.00634004
Gain	chr9	97608553	97613492	2.24168	1.58968	0.992731	0.908906	4.47245	5.34689	1.23993	0.00679238
Gain	chr9	38226103	38228650	1.86409	1.81734	2.23136	2.01796	4.51703	4.52494	1.1859	0.00705475
Gain	chr9	133698505	133701442	1.83994	1.41019	0.797911	2.47313	3.46272	4.90536	1.2547	0.0071299
Gain	chr9	95860510	95861138	1.00127	0.947133	0.428387	1.15134	3.59423	2.13323	1.57977	0.00716877
Gain	chr9	20986622	20991463	1.57167	0.79415	3.07742	2.53762	3.20469	3.61279	1.39891	0.00747973
Gain	chr9	14325404	14327421	1.11832	0.778298	0.587514	0.873242	2.15574	3.09063	1.32519	0.00753851
Gain	chr9	107521426	107521950	0.849724	0.876857	1.33445	0.873629	2.80558	2.60314	1.51543	0.00776766
Gain	chr9	134390043	134392148	1.13389	0.707202	1.16431	1.10039	2.08192	2.65472	1.31157	0.00883251
Gain	chr9	96911432	96913488	1.786	1.73772	2.00421	2.51138	4.04655	4.43329	1.16164	0.0094188
Gain	chr9	135144561	135146286	2.4934	2.4475	3.04425	2.27971	6.9064	5.68658	1.20217	0.00973313
Gain	chr9	90932915	90941176	6.0633	2.63518	7.19461	7.84498	12.5665	13.3294	1.45155	0.009786
Gain	chr9	2723234	2723889	0.920052	1.15583	1.47872	0.809565	2.8197	2.76512	1.37924	0.0110082
Gain	chr9	95870560	95877620	1.82847	1.116	1.5646	2.73158	7.17974	2.64283	1.65855	0.0114421
Gain	chr9	9643867	9645226	1.23489	1.21459	2.15961	0.94074	6.1456	2.04632	1.6792	0.0115443
Gain	chr9	95922265	95923393	0.859996	0.863471	0.525068	0.427631	2.0328	2.57506	1.27212	0.0124394
Gain	chr9	77701326	77704952	3.263	3.99434	4.47235	8.13311	7.93314	8.72804	1.09232	0.0124825
Gain	chr9	97431411	97431782	1.55192	1.09191	0.869211	0.778702	3.22284	4.34175	1.41671	0.014479
Gain	chr9	2014346	2018234	2.09176	2.5833	4.23341	6.07063	4.13974	7.87168	1.23107	0.0149838
Gain	chr9	37038847	37039621	2.23476	1.60729	3.16393	4.20499	3.9779	5.73913	1.24608	0.0156466
Gain	chr9	90947509	90958247	4.87736	2.23918	7.6127	8.17546	8.88011	10.8264	1.34318	0.0159252
Gain	chr9	123488197	123508269	7.39933	6.65484	5.39233	10.5203	14	17.6338	1.05286	0.0164303
Gain	chr9	20996057	20997813	1.15003	0.986387	1.90168	3.21497	3.29479	2.16379	1.26483	0.016461
Gain	chr9	2246792	2249175	1.55203	0.965499	1.96666	1.772	3.11793	3.14772	1.20463	0.0166773
Gain	chr9	98263900	98266208	1.75019	1.70053	0.618499	0.773643	3.93129	3.93869	1.09388	0.0170699
Gain	chr9	140072641	140073231	1.37646	0.824753	0.410338	0.857758	4.11513	2.27039	1.50848	0.018636
Gain	chr9	90945499	90946123	1.63747	0.606579	1.3365	1.35183	3.45282	3.26008	1.4311	0.0190424
Gain	chr9	95905549	95907221	1.69401	2.26606	0.467078	1.47176	8.31272	3.26754	1.47004	0.0196517
Gain	chr9	95898193	95904743	1.00544	1.79813	0.616979	0.637487	6.69292	2.20755	1.60746	0.0199559
Gain	chr9	90942417	90944136	1.22053	0.645497	1.39428	0.912258	2.07118	2.81709	1.28857	0.0205832
Gain	chr9	128655258	128660071	1.55356	1.13065	0.626901	2.10609	2.74659	3.52025	1.10828	0.0208454
Gain	chr9	33124355	33126618	1.22862	1.23197	1.23778	1.56738	3.64631	2.32677	1.19657	0.0211839
Gain	chr9	9729239	9732774	1.69204	1.37848	3.08624	2.06171	6.89733	2.38222	1.51992	0.0218273
Gain	chr9	107669725	107670720	1.00118	0.761268	1.83966	1.35726	3.09525	1.84615	1.34433	0.0222432
Gain	chr9	97613801	97652014	9.75867	7.96424	5.35964	4.8584	17.0921	22.2778	1.03129	0.0235946
Gain	chr9	134231598	134232377	1.21115	1.11095	1.79637	1.88785	2.41536	3.28124	1.25687	0.0246536
Gain	chr9	94050137	94053969	1.47193	1.32112	2.7276	2.53804	2.35034	4.36286	1.14998	0.0248034
Gain	chr9	86431297	86433322	2.42209	3.12763	3.52447	4.26556	4.71713	8.89187	1.16876	0.0261264
Gain	chr9	127523433	127524271	1.5013	1.1942	1.44523	0.719301	3.47032	2.93203	1.17826	0.0275245
Gain	chr9	19129420	19130218	2.39753	0.982857	4.92372	2.29615	5.53039	3.91849	1.36251	0.0307335
Gain	chr9	14317815	14318440	0.754548	1.16796	1.16219	1.38823	2.90011	1.94499	1.31775	0.0324126
Gain	chr9	140506070	140506959	1.09094	1.64302	1.45324	2.7937	3.61785	2.84777	1.14256	0.0367738
Gain	chr9	131182372	131184061	1.63039	2.17917	1.4828	3.81379	4.37804	3.89631	1.0309	0.0369716
Gain	chr9	9686591	9687565	1.1304	0.88876	2.54255	0.519933	3.47811	1.68203	1.30935	0.0418234
Gain	chr9	97930981	97935368	4.40747	2.76472	2.97212	3.82341	6.51828	10.1137	1.08006	0.0418357
Gain	chr9	116355606	116356274	1.01985	1.2548	1.04721	1.26292	3.07212	2.30282	1.17905	0.0436869
Gain	chr9	97668712	97670924	1.67196	0.783137	0.779266	0.796295	2.6778	3.13269	1.15123	0.0483818
Gain	chr9	2345029	2345495	1.85432	0.811802	2.30797	2.27441	4.69436	2.92645	1.3451	0.0495928
Gain	chr8	43107116	43111311	0.938089	0.638909	0.995367	0.972264	6.62878	5.13427	2.79536	5.50354e-10
Gain	chr8	32775502	32778010	0.648454	0.59361	1.04174	1.07758	3.76809	3.87232	2.52792	1.72283e-09
Gain	chr8	80672594	80673891	2.06212	1.46037	1.53619	1.46921	7.57391	10.1077	2.21287	6.17756e-07
Gain	chr8	144105303	144109134	1.97907	1.95746	3.34007	6.98616	6.9724	7.15228	1.72337	1.58569e-05
Gain	chr8	22483883	22484678	0.857134	0.51029	1.01554	2.03186	2.8832	3.21528	2.07861	4.5306e-05
Gain	chr8	123927309	123932274	2.16653	2.97186	3.10368	5.87696	9.28435	8.37113	1.68093	6.30492e-05
Gain	chr8	28347205	28348852	1.56048	1.41312	0.441462	4.08677	5.75752	4.79474	1.70402	0.000109749
Gain	chr8	66698881	66699738	0.948119	0.568099	0.533886	0.956587	3.07409	2.95398	1.94763	0.000157065
Gain	chr8	96201807	96203983	2.4349	1.97778	2.7354	2.88302	8.82709	6.49454	1.6972	0.000173231
Gain	chr8	99818644	99821797	1.78881	1.31362	1.57197	3.13036	4.72434	5.45967	1.60194	0.000205567
Gain	chr8	81164498	81166468	1.47783	1.49754	1.50381	1.16351	7.59465	4.0216	1.86972	0.000244453
Gain	chr8	102388176	102388907	0.967924	0.850856	1.25157	1.25316	3.79042	3.05511	1.85242	0.00025767
Gain	chr8	28350417	28352751	1.78689	1.73958	0.900108	5.33452	6.04399	4.92707	1.5433	0.000400615
Gain	chr8	131314304	131315673	1.32165	1.40339	1.00308	1.42724	4.25051	4.26228	1.54122	0.000479435
Gain	chr8	66702322	66705493	1.69593	2.45866	2.14069	2.77775	6.14458	6.52539	1.50147	0.000498743
Gain	chr8	62754192	62754981	0.896861	0.514166	0.682166	0.73336	2.73166	2.64209	1.86617	0.000514436
Gain	chr8	71272167	71295750	2.9653	2.79704	0.775781	7.90499	14.0624	6.78099	1.76411	0.000764838
Gain	chr8	21906345	21906685	0.615636	0.794117	0	0.495537	3.71673	2.47753	2.16984	0.000859628
Gain	chr8	29594452	29596376	2.31743	2.33516	4.01734	4.10062	8.32776	5.87321	1.52214	0.000889373
Gain	chr8	135563453	135564131	1.15942	0.558338	1.11116	1.35097	2.82508	3.29357	1.76927	0.00117191
Gain	chr8	66711190	66713785	1.49605	1.56468	1.40125	1.19025	4.9745	3.93398	1.43839	0.00119383
Gain	chr8	62749430	62753945	1.38878	0.899449	0.966603	1.08511	3.67876	3.25734	1.4976	0.0014228
Gain	chr8	43217245	43222625	0.502299	0.603889	0.265399	0.551791	7.12965	0.955877	2.79903	0.00161116
Gain	chr8	61677920	61696156	2.77279	2.61187	2.74523	5.58853	6.90267	7.31534	1.29066	0.00162044
Gain	chr8	61697754	61699261	1.21811	1.11334	1.12571	2.35315	2.93023	3.54268	1.41275	0.00197552
Gain	chr8	79576909	79578922	1.61566	1.62692	2.97016	4.38687	3.91184	5.07081	1.34063	0.0023286
Gain	chr8	42994381	43001563	4.31452	3.83025	3.74379	15.5297	10.3769	10.7619	1.26816	0.00237532
Gain	chr8	28369914	28370990	1.04771	0.779444	0.850649	1.32242	2.449	2.9301	1.51487	0.00237532
Gain	chr8	71060267	71061478	1.94863	1.92148	2.26769	2.78842	5.79381	5.06395	1.37687	0.00238329
Gain	chr8	71128345	71136359	1.31617	1.45955	0.685826	2.66847	5.35074	3.05371	1.5083	0.00244851
Gain	chr8	142411114	142413580	1.52109	1.45989	1.96603	2.13314	2.8603	7.71533	1.69922	0.00269001
Gain	chr8	101910790	101923093	4.85416	4.86831	4.42815	7.94979	13.5218	11.5739	1.26394	0.00286506
Gain	chr8	129200515	129204687	2.27011	2.72546	1.18811	2.42959	7.72422	5.74015	1.32512	0.00348262
Gain	chr8	129139061	129142664	1.87855	1.42009	1.2112	1.40659	5.34152	3.85409	1.37278	0.00397277
Gain	chr8	29975681	29976773	1.12841	1.48652	1.89827	2.20858	3.66673	3.47829	1.38451	0.00400614
Gain	chr8	43231802	43236847	0.951683	1.20746	0.891777	1.32515	7.98313	1.83678	2.12417	0.00423574
Gain	chr8	99304964	99306932	4.06483	2.1317	3.95493	10.3351	7.9851	10.9539	1.47532	0.00478234
Gain	chr8	61670854	61677411	1.80065	1.0034	1.28606	2.46624	4.12115	3.72079	1.40286	0.00527053
Gain	chr8	142046476	142046921	0.529537	0.910742	1.63123	1.732	2.76491	2.22854	1.71998	0.00602756
Gain	chr8	74780167	74781136	1.00096	0.72584	1.25005	2.53841	2.43664	2.4592	1.42724	0.0061403
Gain	chr8	11724500	11726154	2.26739	3.32152	2.21426	2.07121	7.26478	6.92146	1.23818	0.00679397
Gain	chr8	80803349	80804237	1.50542	1.0052	2.4248	3.50284	2.65865	4.44416	1.40661	0.00836685
Gain	chr8	71215593	71224464	2.78624	2.16098	0.728915	4.56021	9.38205	4.76686	1.42058	0.00962546
Gain	chr8	71234137	71239463	1.21183	1.38777	0.68287	1.28697	5.9223	2.26232	1.57642	0.0103719
Gain	chr8	126300644	126304864	2.72921	3.17562	2.66838	2.30474	7.25497	6.58144	1.12555	0.0103861
Gain	chr8	11734690	11736529	3.95048	4.25323	4.20292	4.02766	9.45712	9.68269	1.11196	0.0107704
Gain	chr8	144595743	144600576	2.50255	2.87936	3.2163	8.10484	6.05152	6.34826	1.0947	0.0114459
Gain	chr8	81104954	81111320	1.41779	1.39501	1.1088	1.97531	2.40484	5.58079	1.36923	0.0115512
Gain	chr8	31700713	31701280	1.47839	0.3814	1.66038	1.40249	3.07564	3.28101	1.69344	0.0117711
Gain	chr8	123922262	123922949	1.10611	1.10207	1.33161	1.64908	3.08686	2.63651	1.34986	0.012211
Gain	chr8	71085066	71085813	1.71903	1.37569	2.08936	1.35544	3.61775	4.11922	1.26682	0.0124723
Gain	chr8	71242835	71246082	1.43811	1.92591	0.75494	1.25604	6.24337	3.07542	1.39427	0.0133018
Gain	chr8	71300909	71301599	1.44309	1.0581	1.16985	2.30568	4.21361	2.73294	1.40415	0.0133254
Gain	chr8	48394299	48396242	0.931411	1.04473	1.16431	0.980988	2.36114	2.46692	1.16703	0.0134908
Gain	chr8	96124459	96126055	1.18309	1.16999	1.31606	1.33018	4.20402	2.20942	1.38556	0.0142674
Gain	chr8	29938328	29941538	4.60922	5.90333	6.63779	10.0664	10.7424	13.3411	1.08579	0.0149135
Gain	chr8	71264868	71269595	1.3154	1.40323	0.740889	1.60319	7.16526	2.07594	1.69164	0.0151708
Gain	chr8	20087586	20095399	6.5419	7.40577	8.17263	16.7903	14.2075	17.0001	1.04946	0.0152517
Gain	chr8	59724076	59724544	1.2869	0.40417	0.459626	0.514707	3.06754	2.11925	1.61885	0.0164476
Gain	chr8	95998031	96005543	3.94688	3.34843	3.27808	3.44119	8.47577	8.00381	1.0667	0.0167058
Gain	chr8	61699552	61722322	4.00347	3.93746	4.99009	7.04443	8.00733	9.20445	1.00196	0.0208002
Gain	chr8	29949954	29954879	4.26704	4.21089	4.44169	8.47783	9.72134	8.83256	1.02229	0.0214609
Gain	chr8	95916660	95918596	2.1405	1.94323	1.64149	2.33048	4.49177	4.68229	1.04784	0.0234469
Gain	chr8	129661387	129666667	2.19135	1.30756	1.23477	5.56298	6.75872	3.08661	1.40352	0.0248846
Gain	chr8	71303261	71304618	1.00483	0.897329	0.714315	1.26209	3.20344	1.73828	1.29001	0.0259958
Gain	chr8	42010505	42011478	3.0175	3.19726	3.81775	5.79949	7.42056	6.40338	1.04692	0.0292651
Gain	chr8	103549808	103550166	1.38883	0.754301	1.27597	2.08449	3.53037	2.83782	1.42349	0.0295748
Gain	chr8	71251450	71259174	1.45729	1.49682	0.746453	1.79369	5.11263	2.31273	1.2493	0.0340621
Gain	chr8	31763781	31764740	1.14807	0.789816	0.954322	1.20699	2.24793	2.43305	1.15949	0.0344113
Gain	chr8	134154403	134160153	3.53172	3.0512	3.81857	8.69719	11.1143	5.26258	1.22252	0.0362914
Gain	chr8	142317854	142318461	3.10754	3.51854	3.76706	4.64531	6.87337	7.3155	1.0269	0.0368338
Gain	chr8	100249024	100258652	3.07409	2.95289	4.84958	4.60533	4.40405	10.1674	1.14428	0.0416216
Gain	chr8	134790616	134793355	1.66643	2.88583	1.43578	0.836962	6.6008	4.03556	1.14891	0.0438635
Gain	chr8	100294408	100297570	1.16979	0.993111	1.41415	1.28979	1.50532	4.30503	1.26834	0.0449111
Gain	chr8	141655451	141657867	2.76855	2.38639	1.52732	1.9176	7.14278	4.31785	1.05776	0.0491483
Gain	chr14	87530242	87536534	0.433675	0.36146	0.650838	0.375925	2.58553	7.1982	3.48844	4.41318e-10
Gain	chr14	87571797	87581807	0.401054	0.457139	0.551777	0.294181	2.03588	4.63902	2.83396	1.08849e-08
Gain	chr14	87596508	87601293	0.230285	0.367773	0.478557	0.297586	1.71056	6.00697	3.57217	2.07111e-08
Gain	chr14	87586535	87591670	0.424074	0.374345	0.514148	0.291407	1.86077	4.19942	2.80125	2.86936e-08
Gain	chr14	101179946	101181919	0.518449	0.823082	0.791713	1.49192	4.32081	3.67562	2.5052	3.65646e-08
Gain	chr14	87617455	87623992	0.525793	0.434894	0.572871	0.468912	1.81278	4.5607	2.6046	8.16259e-07
Gain	chr14	96140723	96144948	0.900382	0.640781	0.899035	1.01106	5.30104	3.21627	2.38392	9.34831e-07
Gain	chr14	91495522	91497356	0.958136	0.826401	1.395	0.697224	5.4508	3.43948	2.20045	4.28051e-06
Gain	chr14	61485671	61488883	0.808561	0.935516	0.796709	0.894065	3.13437	3.63481	1.86935	6.56282e-06
Gain	chr14	61528258	61535640	1.86246	2.73251	2.51828	2.92633	7.89196	9.74676	1.83101	1.2158e-05
Gain	chr14	38470228	38470858	0.499046	0.686641	0.469732	0.382563	2.82285	3.03219	2.28408	1.68296e-05
Gain	chr14	100771686	100774340	1.42327	1.7135	1.4513	3.62778	6.76052	5.33464	1.84613	1.69787e-05
Gain	chr14	21565131	21567730	2.38192	2.03096	1.91728	2.36755	6.61369	11.2581	1.89244	2.48233e-05
Gain	chr14	92080370	92081030	0.198498	0.819347	0.896826	0.839961	2.85019	2.51865	2.45982	2.89236e-05
Gain	chr14	42497190	42498487	1.05128	0.876221	1.20404	3.32898	5.04048	3.25439	2.01571	3.88076e-05
Gain	chr14	90719703	90720914	1.01762	0.938395	3.20145	1.81247	3.27845	3.91584	1.81364	5.68347e-05
Gain	chr14	22940702	22947737	1.60746	2.17451	1.85356	1.19738	6.37275	6.20145	1.62297	9.10113e-05
Gain	chr14	91493152	91494305	0.932323	0.891696	1.09744	0.941325	3.29481	3.33749	1.78125	0.000106832
Gain	chr14	91494417	91495381	0.897377	0.505108	1.06107	0.500306	2.55575	2.93543	1.91037	0.000210185
Gain	chr14	61515433	61518986	1.07801	1.26482	1.42537	1.76599	4.44321	3.27207	1.62965	0.000264958
Gain	chr14	22958399	22961696	0.938901	0.977092	1.26639	0.856383	4.77772	2.51646	1.84459	0.000299474
Gain	chr14	103021220	103022231	1.27059	2.62231	3.03537	6.70284	6.7019	7.34151	1.74617	0.000432002
Gain	chr14	72048787	72050395	1.66354	1.32957	0.602884	1.12522	4.89649	4.55576	1.55323	0.000523488
Gain	chr14	95989883	95991811	1.08829	1.03882	1.70418	1.51421	3.19634	3.40069	1.51477	0.000543589
Gain	chr14	91502367	91503330	0.680537	0.814629	0.810603	0.375619	3.26907	1.98476	1.80876	0.000881629
Gain	chr14	91506397	91516374	2.92975	2.55108	3.99403	3.70153	7.43924	7.79214	1.35978	0.00101313
Gain	chr14	61552886	61558905	1.88311	2.06019	1.3428	6.7046	5.25192	5.39891	1.32732	0.00130799
Gain	chr14	85037394	85042868	2.69365	2.21087	4.89203	6.14186	12.9259	5.29641	1.80851	0.00178275
Gain	chr14	100798205	100800786	1.87004	2.39121	1.64888	1.68286	7.94664	4.90805	1.50302	0.00206166
Gain	chr14	35907763	35909272	1.04271	0.950469	1.07068	1.02314	3.743	2.50127	1.53092	0.0023302
Gain	chr14	84594515	84597048	1.96759	1.23963	5.43377	1.53374	9.09749	3.56935	1.8934	0.00233753
Gain	chr14	36089675	36090068	0.799233	0.756024	1.43618	0.857758	3.12982	2.45959	1.85087	0.00274515
Gain	chr14	35988929	35990268	1.39041	1.79856	1.91032	1.24302	3.62992	5.767	1.42208	0.00312985
Gain	chr14	95951271	95957156	3.15647	3.26186	2.93444	3.67879	10.324	6.95293	1.33584	0.00406867
Gain	chr14	22973956	23009596	6.95925	7.22553	8.47733	4.80479	14.7787	21.6321	1.23846	0.00429714
Gain	chr14	58637567	58637950	1.02506	1.19883	1.61393	1.00582	3.65734	3.17073	1.65955	0.00439673
Gain	chr14	71944535	71946233	1.25107	1.11569	0.681965	1.10824	2.78227	3.55392	1.30148	0.00497965
Gain	chr14	36093371	36095340	1.97144	1.41583	1.81917	3.9947	4.85122	4.09932	1.32239	0.00545077
Gain	chr14	61135324	61136444	1.5684	1.44939	2.09122	1.18438	5.1641	3.30275	1.42156	0.00561654
Gain	chr14	72122723	72127343	1.34586	0.82627	0.874666	0.919411	2.13486	5.16214	1.60907	0.00563733
Gain	chr14	104214412	104215876	2.20321	2.71718	1.60018	4.28419	5.28426	7.73432	1.27845	0.00566246
Gain	chr14	61490518	61505795	4.65126	4.96816	3.90656	12.0809	10.4099	12.7575	1.15526	0.00599687
Gain	chr14	72322575	72323708	0.925626	1.24174	0.855414	1.04308	2.8092	3.02385	1.33614	0.00655717
Gain	chr14	105714019	105715838	2.99903	2.67818	2.66494	4.80142	6.09799	8.19171	1.21282	0.00679238
Gain	chr14	71814911	71816643	1.24166	0.890667	0.93291	1.12829	2.45096	3.31214	1.29827	0.00765243
Gain	chr14	71826483	71831307	2.1809	1.5041	0.860024	1.85113	4.68554	4.67094	1.22228	0.00847854
Gain	chr14	51207947	51208781	1.22565	1.71881	1.38762	0.751657	3.24081	4.31495	1.30469	0.00890834
Gain	chr14	96145251	96147377	1.5545	1.09489	0.798105	1.46405	4.3643	2.85047	1.33322	0.0108719
Gain	chr14	84960324	84961119	1.15383	0.918522	2.13263	2.12284	4.13115	2.06028	1.52852	0.0110028
Gain	chr14	68088877	68090372	1.89444	1.04987	2.55767	0.903627	2.63317	7.29168	1.60908	0.0123066
Gain	chr14	100777651	100779926	2.59417	2.60562	2.65193	6.38494	8.53344	4.95654	1.28758	0.0123295
Gain	chr14	71989572	71992855	3.66774	2.38305	1.11589	1.74947	8.46966	6.94599	1.23471	0.0123673
Gain	chr14	71877368	71879438	1.12771	0.75838	0.650544	0.571148	2.62985	2.15967	1.26919	0.0128599
Gain	chr14	95908473	95911061	1.55077	1.89315	1.00955	2.31234	7.09163	3.00405	1.47371	0.0133018
Gain	chr14	72082549	72090833	2.02077	1.09167	0.598429	0.941115	3.08019	5.89638	1.39814	0.0135613
Gain	chr14	61507161	61511644	1.703	1.86005	1.4242	2.05651	5.24049	3.45237	1.1932	0.0153634
Gain	chr14	74605774	74608704	1.86224	1.90323	1.7835	2.24843	3.77485	4.76448	1.08559	0.0158753
Gain	chr14	105268751	105272072	2.06172	1.98082	0.835458	2.94299	7.2076	3.59783	1.32509	0.016907
Gain	chr14	22964703	22965727	0.921652	0.924663	1.02525	0.96559	2.5064	2.06058	1.26174	0.018562
Gain	chr14	103010648	103011561	0.516791	1.3036	0.589618	0.9508	3.59781	1.87585	1.57703	0.0186743
Gain	chr14	61188385	61191737	6.24536	5.0153	3.64846	14.3341	12.157	13.2356	1.05622	0.0189061
Gain	chr14	60617595	60619662	1.7765	1.97727	2.76231	3.08167	3.52811	5.2508	1.11311	0.0195326
Gain	chr14	85033022	85035774	1.48699	1.63283	2.67204	2.12198	6.83092	2.51821	1.48183	0.0198704
Gain	chr14	71909692	71910347	1.32007	1.23839	0.616133	0.993557	3.34187	2.99239	1.25536	0.0198902
Gain	chr14	103026421	103027672	1.88637	1.75194	0.839358	2.94999	5.63607	3.4335	1.23057	0.0200292
Gain	chr14	105952016	105952548	1.0339	0.660473	0.657209	1.53987	2.37787	2.1445	1.44918	0.0206465
Gain	chr14	61123218	61126413	4.68833	4.32118	4.22394	5.44579	9.00297	10.6825	1.01819	0.0218573
Gain	chr14	61278720	61285661	2.57803	1.55252	2.40655	3.15048	3.4343	8.51539	1.38809	0.023434
Gain	chr14	96176627	96180580	6.8358	2.91066	9.05681	10.684	11.7386	15.0384	1.32948	0.0235511
Gain	chr14	22895213	22904346	8.65906	6.19618	4.00614	7.51625	19.5422	15.0384	1.11177	0.02367
Gain	chr14	100759348	100767157	3.27263	2.64553	2.50825	5.90667	9.21046	5.29098	1.20085	0.023942
Gain	chr14	65438677	65439452	1.21739	1.11668	1.52784	2.02202	3.00165	2.68975	1.21055	0.0241197
Gain	chr14	22886851	22894903	2.85779	2.35722	1.05065	2.86272	7.92018	4.65614	1.17403	0.0255276
Gain	chr14	50612007	50614095	2.02244	1.77591	1.97351	1.62935	4.72245	3.79443	1.06876	0.0280642
Gain	chr14	90347485	90349742	1.04594	0.887456	2.27927	1.26151	4.1111	1.51862	1.45269	0.0280814
Gain	chr14	72144038	72144552	1.47768	0.841302	1.04643	1.68744	4.78893	2.2677	1.4945	0.0290667
Gain	chr14	90345165	90345664	0.944694	0.866541	3.66459	1.11043	2.53481	2.23634	1.32553	0.0298648
Gain	chr14	100133754	100134411	1.11666	1.35809	0.450458	0.623671	2.39467	3.70079	1.19312	0.0300619
Gain	chr14	72019375	72024701	4.63056	3.34998	1.05718	1.58152	8.96382	8.63413	1.02848	0.0304246
Gain	chr14	21994355	21996177	1.98646	1.27747	3.51785	2.92643	4.15259	3.44849	1.12631	0.0309504
Gain	chr14	105759920	105760967	1.30206	0.568461	0.257114	1.10564	2.32065	2.75037	1.29505	0.0315031
Gain	chr14	103986402	103988270	2.3307	2.27473	2.1049	6.4321	5.77317	4.4405	1.04958	0.0321312
Gain	chr14	22859629	22862242	1.7066	1.50211	1.31945	1.14511	3.13188	3.84035	1.00954	0.0321538
Gain	chr14	61380225	61381123	1.10921	0.963894	0.509538	1.12777	2.40046	2.54286	1.1384	0.033081
Gain	chr14	31752860	31753711	1.66319	1.5256	4.42767	2.06831	3.45758	3.79139	1.08731	0.0332184
Gain	chr14	100769329	100770045	0.878376	1.2841	0.676457	0.976364	2.91423	2.32194	1.21674	0.0334093
Gain	chr14	72016998	72018973	1.43425	1.21967	0.72273	0.806287	4.02174	2.38925	1.17375	0.0336454
Gain	chr14	104338363	104339408	2.05717	2.4853	0.618254	2.14627	5.69811	4.53729	1.06625	0.0339198
Gain	chr14	96195311	96196375	1.37983	0.483107	1.61926	1.79065	4.18126	1.74987	1.58099	0.0341695
Gain	chr14	71865072	71868318	1.5517	1.36773	0.871353	1.42742	3.39693	2.88505	1.01596	0.0356306
Gain	chr14	24475364	24476936	2.33554	2.51341	2.2269	1.93364	5.29165	4.81799	1.0234	0.0357469
Gain	chr14	103584728	103586165	1.97085	1.39352	0.805743	4.21354	6.62215	2.62651	1.36563	0.0390764
Gain	chr14	96175140	96176232	1.12841	0.693708	1.08472	1.63435	1.69234	2.84174	1.18623	0.0423084
Gain	chr14	72039691	72048720	4.7659	4.18036	1.18465	4.00191	11.7898	7.78191	1.02925	0.0433187
Gain	chr14	100753422	100758544	2.55602	1.63861	1.88824	4.33978	6.94043	3.50193	1.22335	0.043508
Gain	chr14	61559616	61562184	1.50156	1.07517	1.06985	1.99207	2.78673	2.85333	1.05204	0.0435543
Gain	chr14	81629092	81631384	1.80818	2.10211	3.3491	2.00024	5.63184	3.17511	1.09602	0.0483818
Gain	chr21	45842531	45844327	0.569515	0.708254	0.88469	2.94191	3.62175	3.24948	2.55477	1.04018e-08
Gain	chr21	44705642	44718447	3.20078	2.46561	0.513409	2.7201	13.8317	17.0363	2.3255	1.05607e-08
Gain	chr21	23947549	23948131	0.675167	1.06831	3.51263	1.53203	6.75682	4.09164	2.46382	7.19398e-06
Gain	chr21	44726746	44728712	1.90774	1.66579	0.904121	1.05542	7.29664	6.44259	1.84153	1.21333e-05
Gain	chr21	44737681	44740301	0.941129	1.58075	0.575716	0.967064	4.94013	5.23319	1.91788	1.85083e-05
Gain	chr21	40266656	40272475	3.39065	2.24731	2.37973	2.29784	11.0885	10.9042	1.84532	2.32412e-05
Gain	chr21	40376407	40376954	0.909833	0.642395	0.835902	1.05722	4.25051	2.90198	2.33372	2.56872e-05
Gain	chr21	40222194	40236985	4.25413	4.09706	2.40455	3.29816	17.2081	12.6945	1.73721	4.23505e-05
Gain	chr21	44722981	44725035	1.45573	0.975122	0.629385	1.02197	4.20051	4.87291	1.78928	7.99761e-05
Gain	chr21	22534741	22535735	0.949441	0.625956	1.46237	0.849137	3.9246	2.57222	1.96536	0.000244208
Gain	chr21	44729249	44735845	6.97307	5.59485	3.28395	7.80874	19.0353	19.7407	1.51415	0.000253808
Gain	chr21	22490591	22491316	0.686761	0.857887	0.927877	0.598506	2.45347	3.04613	1.82332	0.000401267
Gain	chr21	36770835	36772836	2.0579	1.63667	2.00544	1.49517	6.39913	4.6792	1.4997	0.00141372
Gain	chr21	44802424	44803714	1.84971	1.48926	1.08534	2.5056	5.30661	4.60009	1.4672	0.00142059
Gain	chr21	18863759	18865749	1.97701	1.03367	0.51428	1.23669	4.35274	4.73002	1.45643	0.00450001
Gain	chr21	40239711	40242462	2.48875	1.9975	1.7918	1.69294	6.77117	5.22787	1.31163	0.0049373
Gain	chr21	30821388	30822648	2.24749	1.3529	0.833368	0.765734	6.32928	4.35484	1.47231	0.00515915
Gain	chr21	40378225	40379235	2.05052	1.66066	1.78571	2.48322	7.62333	3.98161	1.54384	0.00560804
Gain	chr21	40368691	40371079	1.77946	1.3602	0.654182	1.46516	5.11877	3.43236	1.35561	0.0064874
Gain	chr21	40860121	40863811	2.35327	2.48711	0.43802	3.26354	9.97649	4.62495	1.50781	0.00660621
Gain	chr21	44581580	44586376	1.4223	1.65401	0.859427	1.05174	3.09908	4.69821	1.22244	0.00752812
Gain	chr21	35075798	35077040	1.83669	0.936777	0.476912	0.660299	2.83844	6.75679	1.63309	0.0077202
Gain	chr21	37502179	37502895	1.82995	2.03945	1.08985	2.86176	5.15962	3.56954	1.34785	0.011937
Gain	chr21	44800615	44802067	1.53512	1.36049	1.33522	3.58857	3.65409	3.30055	1.16853	0.0144284
Gain	chr21	19061326	19061846	1.20882	1.19544	0.93094	1.06567	3.81332	2.71852	1.37863	0.0175843
Gain	chr21	40243441	40244515	1.44023	1.2847	1.15302	1.14523	5.0027	2.42703	1.3957	0.018153
Gain	chr21	18880795	18894081	3.58458	1.85665	0.701675	1.91308	6.78535	7.24669	1.24243	0.0187666
Gain	chr21	40218999	40220477	1.11779	0.970391	0.856282	0.68551	3.84462	1.79767	1.4057	0.019693
Gain	chr21	43923295	43925911	4.02095	1.97637	0.978153	9.3349	8.16759	7.44401	1.26751	0.020683
Gain	chr21	34683864	34686574	2.69094	2.66699	3.32968	2.39528	5.31944	6.43432	1.02367	0.0227192
Gain	chr21	18870891	18872005	2.68299	1.28718	0.724992	0.9093	4.85395	5.57134	1.27331	0.0250565
Gain	chr21	18757741	18763394	6.10785	2.81618	1.95396	4.90566	10.2144	13.2196	1.2657	0.025383
Gain	chr21	44614155	44614532	1.38844	1.8626	0.213854	2.1713	4.71221	3.68121	1.30155	0.0270698
Gain	chr21	18796631	18806914	10.3216	6.30905	2.37909	11.246	17.1704	21.7748	1.10377	0.0286537
Gain	chr21	18858999	18862962	4.25001	1.42092	1.1148	2.08878	8.82278	7.64753	1.41796	0.031254
Gain	chr21	43426672	43427565	1.52635	1.09045	1.44674	2.24116	4.32966	2.44591	1.27593	0.0349958
Gain	chr21	40874162	40876698	3.26855	2.45497	0.764714	5.01445	8.65467	4.95593	1.15242	0.0390148
Gain	chr21	18873911	18877289	2.27545	0.881543	0.454542	0.714405	4.09549	4.04454	1.24749	0.0452846
Gain	chr21	44593114	44593788	0.62202	2.64776	1.67661	2.39609	6.69859	3.53396	1.55718	0.0481823
Gain	chr1	92949897	92954209	0.888305	0.935505	3.47987	2.71453	6.95725	9.4369	3.04774	4.80827e-14
Gain	chr1	52607252	52608556	0.744012	0.767769	0.474902	4.03254	7.11331	6.37865	3.07991	1.72665e-12
Gain	chr1	84568054	84570174	0.606239	0.727735	0.711434	0.603209	5.2003	4.44011	2.74273	1.73719e-10
Gain	chr1	203141604	203147138	0.753821	0.753429	0.81786	3.0529	6.99936	4.22891	2.81367	1.1867e-09
Gain	chr1	212623085	212624983	0.359283	0.456314	0.581763	1.22033	2.72374	2.97027	2.69879	1.54469e-09
Gain	chr1	41835861	41838070	0.344345	0.502378	0.670591	0.567994	2.78993	2.88959	2.65942	2.49203e-09
Gain	chr1	86447753	86452412	0.720796	0.598536	0.769047	0.305632	3.39601	3.73789	2.32828	1.47486e-08
Gain	chr1	10612728	10618215	1.82179	1.33719	1.05563	2.55121	7.25903	7.65187	2.12169	2.88172e-07
Gain	chr1	198167536	198173067	1.16218	0.641251	0.550406	1.14328	4.17341	5.75838	2.33073	9.39062e-07
Gain	chr1	15910519	15911995	0.781737	0.421683	0.273651	7.2076	2.66705	5.90502	2.67579	1.05256e-06
Gain	chr1	227057948	227058702	0.278056	0.430401	1.03499	0.159866	1.9509	2.92912	2.62179	2.1569e-06
Gain	chr1	202774440	202777478	0.846221	1.26531	0.443329	2.23207	4.00139	5.2411	2.02178	3.20213e-06
Gain	chr1	86453867	86460806	2.7754	2.38408	2.03451	0.980895	10.6366	9.62778	1.86792	3.90994e-06
Gain	chr1	233248718	233249695	0.590299	0.415328	0.826551	0.543021	3.53749	2.21042	2.45248	5.56785e-06
Gain	chr1	121269591	121272936	1.03523	0.963075	0.68451	0.771953	3.86972	3.84679	1.84456	7.58285e-06
Gain	chr1	109938698	109941657	1.17909	1.52779	0.837497	3.4497	5.75146	5.04519	1.88524	7.78095e-06
Gain	chr1	246376159	246384551	2.80768	2.98445	2.20239	4.30851	8.99105	12.843	1.79729	1.01197e-05
Gain	chr1	121165041	121166603	0.839459	0.589059	0.620627	1.26645	4.22972	2.73441	2.17914	1.44309e-05
Gain	chr1	182452798	182454833	0.747547	1.07732	1.01906	0.782526	4.69396	3.17315	2.05125	1.6811e-05
Gain	chr1	199188923	199196391	0.776459	0.554713	0.703492	0.504191	6.48485	2.25227	2.63361	1.82927e-05
Gain	chr1	17215238	17216200	1.30799	1.74343	1.34308	2.80753	5.6201	6.34751	1.86341	2.29741e-05
Gain	chr1	100301340	100302600	1.22779	1.15963	1.41031	1.55061	4.91673	4.39425	1.8635	2.46586e-05
Gain	chr1	84541941	84544670	2.05703	3.5114	3.1091	3.29822	10.9538	10.631	1.855	3.19297e-05
Gain	chr1	41845258	41846019	0.344376	0.675208	1.16693	0.60191	3.41642	2.1196	2.35872	4.69433e-05
Gain	chr1	246388765	246390670	0.770999	0.454638	0.551352	1.01321	2.04878	3.55905	2.09446	5.73527e-05
Gain	chr1	226410932	226412341	0.669995	0.614568	1.14662	0.992983	4.61581	2.009	2.30831	5.81979e-05
Gain	chr1	86441233	86443359	0.863613	0.445594	0.329377	0.192936	3.6235	2.41823	2.11494	6.88144e-05
Gain	chr1	121291099	121298650	2.53311	1.86099	1.44861	2.81929	7.11209	7.74532	1.63649	0.000106832
Gain	chr1	41128321	41130424	1.23475	1.36427	1.34472	1.06701	3.95616	4.60589	1.60002	0.000158517
Gain	chr1	199051792	199054551	1.54977	1.04001	1.35704	0.472299	8.19121	3.78125	2.12644	0.000165515
Gain	chr1	66737078	66738384	1.14443	1.36744	2.76259	1.21899	3.98365	4.42971	1.64491	0.000196586
Gain	chr1	121137462	121139130	2.98735	2.69334	1.9858	4.4114	11.6575	7.92045	1.69349	0.00021843
Gain	chr1	109675853	109677832	1.60365	1.40868	0.925403	1.64589	5.79552	4.56805	1.65607	0.000227898
Gain	chr1	41831426	41833012	1.85195	1.97934	2.64871	1.79489	5.39605	6.76397	1.54758	0.000282713
Gain	chr1	66907543	66908926	1.09972	0.782642	1.83012	1.2035	2.79676	3.66259	1.73652	0.000299655
Gain	chr1	67303412	67304477	0.935438	0.762085	0.758318	0.407613	2.73133	3.49646	1.74136	0.000301064
Gain	chr1	33190762	33191343	0.58615	0.790979	0.833368	0.705113	4.23763	2.3055	2.11762	0.000327366
Gain	chr1	121158358	121160025	1.68336	1.03902	1.0985	1.73667	4.45632	5.05008	1.67523	0.000357741
Gain	chr1	247494097	247496175	3.71092	2.72227	4.35484	6.50229	10.1329	9.86039	1.53076	0.000453005
Gain	chr1	101514947	101520133	4.23952	2.84524	3.25196	5.39386	12.8643	10.3091	1.59695	0.000531281
Gain	chr1	109933618	109936381	1.28169	1.14627	1.06261	2.06987	3.879	3.47012	1.50382	0.000543282
Gain	chr1	93492932	93502193	2.57542	2.47054	1.04151	5.76518	8.83167	6.53533	1.50388	0.000555656
Gain	chr1	84540685	84541656	0.94491	0.52933	0.887096	0.620878	2.81927	2.58196	1.75773	0.000767164
Gain	chr1	4100788	4110274	3.68991	3.43381	3.75766	4.67426	8.53194	12.153	1.41346	0.000830518
Gain	chr1	192775418	192779301	1.56071	1.67329	1.44995	3.3997	4.09215	5.22042	1.40795	0.000841516
Gain	chr1	4086219	4091167	4.50172	3.31585	7.56261	7.6775	9.72461	14.2693	1.49095	0.000938488
Gain	chr1	4118710	4119508	0.919602	0.779507	0.607034	0.271912	3.30109	2.51903	1.71792	0.00105191
Gain	chr1	61603885	61608328	1.21641	0.816526	0.703349	1.91206	3.52253	2.84043	1.54222	0.00105508
Gain	chr1	38474260	38476159	1.86453	2.50841	2.24074	2.10905	6.25589	6.15974	1.42381	0.00112414
Gain	chr1	160429780	160431111	2.69901	1.82969	3.01418	2.79093	7.89491	6.10012	1.56577	0.00115964
Gain	chr1	28797411	28798610	1.33394	1.35397	1.4371	1.42827	4.70995	3.60299	1.54384	0.00117004
Gain	chr1	160406626	160409742	3.50223	3.55325	8.20383	2.04456	9.74765	9.43864	1.33915	0.00126586
Gain	chr1	202162196	202166247	2.92076	2.7066	3.99661	17.652	10.567	6.58612	1.5301	0.00129526
Gain	chr1	202167652	202171919	1.18665	0.881921	1.92558	6.83243	5.52978	2.4103	1.83984	0.00138103
Gain	chr1	212937679	212938737	1.0903	0.946117	1.27222	1.29931	3.461	2.95644	1.5556	0.00140087
Gain	chr1	61692533	61694216	1.37129	0.884422	0.624036	1.11811	4.45467	3.08389	1.63833	0.00144436
Gain	chr1	198988802	198991069	1.81654	0.823844	1.03363	1.77749	10.6478	3.26489	2.29599	0.00145682
Gain	chr1	226402449	226404185	1.05752	1.216	1.00833	1.19517	5.3442	2.63216	1.72965	0.0015554
Gain	chr1	102257186	102259200	0.911615	0.645068	1.92564	9.97936	2.26094	2.49098	1.49126	0.00172235
Gain	chr1	52428711	52430381	1.64893	1.37747	1.24166	1.24238	9.26563	3.16736	1.9591	0.00197829
Gain	chr1	167516887	167524152	1.77327	2.07586	1.539	2.09969	5.19517	4.95185	1.29998	0.00197829
Gain	chr1	4094009	4097592	1.72063	1.43557	2.66147	1.45485	3.59363	5.49101	1.40551	0.00200579
Gain	chr1	66891740	66892274	1.17719	0.961698	2.16572	0.947542	3.45743	3.80851	1.6213	0.00204233
Gain	chr1	212855980	212857398	2.16367	2.3091	2.29768	3.38535	5.6004	6.61918	1.34284	0.00204795
Gain	chr1	121209088	121209929	1.05963	0.643216	0.960055	1.06077	2.9291	2.65598	1.61113	0.00240201
Gain	chr1	4072941	4074029	1.13255	1.26818	1.36089	0.775841	3.23983	3.46825	1.42131	0.00251405
Gain	chr1	222987918	222988857	2.00999	1.15232	4.21383	5.59837	4.29999	5.49832	1.52424	0.00265734
Gain	chr1	222628625	222629493	1.05691	1.18414	1.45735	1.41672	2.52275	5.17551	1.62786	0.00272014
Gain	chr1	243751291	243752753	1.29145	0.610814	0.810392	0.759008	5.90024	2.24194	1.9849	0.00277961
Gain	chr1	147003311	147009730	2.71816	2.19757	4.5203	7.26073	6.16788	6.75778	1.28284	0.00278071
Gain	chr1	229827141	229830838	2.26367	1.66958	1.17313	2.28472	5.52994	5.22766	1.34133	0.00283662
Gain	chr1	149981915	149983171	2.21289	2.32663	3.66562	4.18653	6.86718	5.55477	1.36114	0.00286804
Gain	chr1	167509230	167516575	2.15047	2.49561	1.34251	2.97721	5.27381	6.61964	1.23724	0.00348777
Gain	chr1	192577437	192585901	2.139	1.39796	1.95128	5.16445	5.37383	4.54987	1.38222	0.00349163
Gain	chr1	161185337	161189990	3.68193	2.66488	0.671612	6.94005	12.2694	7.01024	1.51217	0.00353877
Gain	chr1	211779982	211780874	0.999116	0.909722	1.68975	1.37864	2.76181	2.86603	1.46277	0.00362284
Gain	chr1	109848533	109852770	4.56966	3.69323	2.75941	9.89399	11.0166	10.2254	1.25288	0.00419091
Gain	chr1	121197936	121203659	4.8687	3.02775	2.81036	9.30755	10.676	11.0957	1.34777	0.00421288
Gain	chr1	167027973	167028599	1.54854	1.64118	1.07438	1.15501	4.31591	4.39896	1.41013	0.0042206
Gain	chr1	246118862	246120155	1.74402	1.15098	1.24941	2.77962	4.02367	4.22458	1.38873	0.00423352
Gain	chr1	224032280	224034808	1.58756	1.18854	1.00153	1.37451	2.54637	7.82094	1.75902	0.0042443
Gain	chr1	121286396	121287520	1.28292	0.962823	0.694596	1.07288	4.23229	2.65047	1.50998	0.00441525
Gain	chr1	9508441	9509474	1.62423	1.04756	0.57331	1.19065	3.34591	4.27754	1.43164	0.00471057
Gain	chr1	150949278	150950574	1.84115	1.92082	2.34761	3.92713	4.30488	5.40261	1.26742	0.00512995
Gain	chr1	193583356	193584799	1.72641	1.5565	2.46317	0.534953	4.00897	4.49126	1.26413	0.00528408
Gain	chr1	92545441	92546636	1.03123	1.26793	2.25297	2.64407	2.46309	3.88513	1.37617	0.00590025
Gain	chr1	66900776	66905887	1.40653	1.48852	3.04666	1.93137	2.93492	4.48648	1.24528	0.006004
Gain	chr1	66909270	66912271	1.17134	1.01931	2.42348	1.4635	2.13375	4.37037	1.42029	0.00601091
Gain	chr1	167533410	167534472	0.98745	1.37562	1.16604	1.15816	2.77127	3.59983	1.35368	0.00619247
Gain	chr1	6097321	6097892	0.917535	0.520758	0.659506	1.35048	2.63493	2.1286	1.6457	0.00669476
Gain	chr1	210501903	210502940	0.707863	1.0957	2.2844	0.162792	1.68301	4.11743	1.6112	0.00675709
Gain	chr1	10611246	10612279	0.634465	0.968992	0.54725	1.09726	2.25269	2.30699	1.4121	0.00714773
Gain	chr1	24329442	24330574	1.6676	0.956025	0.404302	0.426121	5.4722	2.82914	1.59489	0.00729689
Gain	chr1	203158915	203159615	0.561515	1.23615	0.499703	1.54963	4.69101	2.09136	1.81975	0.00733105
Gain	chr1	41130718	41132289	2.03655	1.87764	1.78266	2.34948	5.05532	4.63137	1.21835	0.00753851
Gain	chr1	242149369	242159807	2.80791	1.07913	1.46098	3.32994	13.2173	4.02036	2.0614	0.0076465
Gain	chr1	213276051	213280783	3.81452	2.37438	1.92997	6.51819	7.65706	8.53123	1.27167	0.00779806
Gain	chr1	23233475	23235197	0.883347	0.974418	0.641188	1.55514	4.91049	1.65847	1.75127	0.00781925
Gain	chr1	160345027	160346338	1.60009	1.15583	3.88164	5.35417	3.28965	4.0151	1.29221	0.00798905
Gain	chr1	201389428	201394314	0.837666	1.29108	0.75538	2.77111	5.07469	1.95247	1.65806	0.00808473
Gain	chr1	242160463	242163775	0.879205	0.375989	0.642529	0.684919	4.4976	1.18503	2.09761	0.00861255
Gain	chr1	243285308	243287571	0.857717	1.12432	1.3925	0.74637	4.11534	1.93166	1.51545	0.00863296
Gain	chr1	199117658	199123958	5.62645	2.83644	2.58722	4.49388	16.9993	9.42898	1.54055	0.0094421
Gain	chr1	32205153	32205826	0.973349	1.36602	0.599678	1.54007	5.79373	2.212	1.68288	0.00951677
Gain	chr1	160416433	160417924	1.23117	1.27048	2.18526	0.776614	3.23715	3.06439	1.2191	0.0098302
Gain	chr1	241791265	241791617	1.11508	1.07397	3.89298	3.14569	3.59038	2.74527	1.60017	0.0102194
Gain	chr1	67379842	67381027	0.973546	0.707809	1.2723	0.386725	2.19504	2.4513	1.32554	0.0107362
Gain	chr1	102251989	102255149	2.24974	1.11367	3.45237	17.0681	5.0498	4.36278	1.38486	0.0110433
Gain	chr1	66838043	66842575	1.64986	1.31424	2.51444	1.32601	2.8564	4.6539	1.22656	0.0110928
Gain	chr1	840130	841018	2.56806	2.83283	3.9706	6.59838	6.82	6.26096	1.18156	0.011544
Gain	chr1	156627594	156628324	1.25643	1.22246	1.62189	1.75021	2.999	3.73913	1.29376	0.0116882
Gain	chr1	4066164	4069320	2.28584	1.95569	3.72134	2.8827	5.21896	4.73824	1.1382	0.0118422
Gain	chr1	167236487	167244083	2.78753	2.12443	1.79117	1.74447	5.41519	6.32571	1.13511	0.0121243
Gain	chr1	167424076	167425300	2.52775	2.14425	3.29946	3.80324	5.73233	5.49703	1.16332	0.01252
Gain	chr1	150243657	150245503	1.64808	1.71537	1.59018	2.2872	4.26554	3.86109	1.15449	0.0125955
Gain	chr1	67242808	67244344	1.34878	0.369985	0.631125	0.455467	2.31778	3.89617	1.70431	0.0127162
Gain	chr1	67231012	67237394	2.72158	0.776364	0.531903	0.593755	4.59906	8.49813	1.77377	0.0127227
Gain	chr1	25870001	25870844	2.89154	2.79136	3.44801	3.83261	6.37192	6.91863	1.15187	0.0132134
Gain	chr1	54326847	54330841	2.34498	3.52473	2.05042	8.06068	6.8937	7.07194	1.14364	0.0132609
Gain	chr1	10447563	10448857	1.96558	2.78113	2.08074	1.84543	5.47537	5.87146	1.16627	0.0133254
Gain	chr1	156550962	156553910	4.5382	4.07706	1.27921	5.67272	8.13086	12.8328	1.15476	0.0133502
Gain	chr1	20125243	20127221	4.81337	2.16197	4.32981	6.01359	8.48132	11.5891	1.40313	0.0133887
Gain	chr1	151626600	151627223	1.1775	1.69246	2.28864	2.05033	3.45835	4.14136	1.29479	0.0134908
Gain	chr1	109928226	109929503	1.08826	0.826367	0.969871	0.679993	3.85962	1.84709	1.48854	0.0135536
Gain	chr1	197642384	197648267	2.35032	0.837602	0.778508	0.951805	4.26721	5.97978	1.54479	0.0137556
Gain	chr1	173297671	173303617	1.60617	1.49809	1.88941	0.76312	2.05629	9.86072	1.80072	0.0144134
Gain	chr1	226407134	226408386	1.0262	0.605126	0.752669	0.34678	3.38988	1.62614	1.53071	0.0147639
Gain	chr1	54929866	54930930	1.62623	1.5256	1.13854	2.7653	3.4415	4.08304	1.1781	0.0147864
Gain	chr1	154942637	154944309	2.68218	2.76783	2.14211	3.07338	6.36763	6.0004	1.0977	0.015496
Gain	chr1	51700348	51702987	2.45517	2.88232	2.84765	3.35579	5.9296	6.24028	1.07386	0.0155735
Gain	chr1	170042133	170044578	2.24222	2.19204	2.3134	3.98711	5.01349	5.04888	1.07626	0.0164817
Gain	chr1	19794994	19797071	2.47514	2.8148	3.12506	3.81032	5.88486	6.05062	1.07181	0.0168023
Gain	chr1	23302663	23302974	1.68215	1.04152	0.777275	1.16056	4.28177	3.50423	1.48394	0.0169161
Gain	chr1	160412609	160415499	2.13309	2.12626	2.90799	1.78689	5.75839	4.23734	1.13923	0.0170558
Gain	chr1	160695603	160696713	1.4408	1.43806	1.23692	0.934302	4.0698	3.17592	1.18974	0.0176063
Gain	chr1	21347502	21350122	4.30517	4.81458	4.62629	3.08539	9.266	11.0731	1.04229	0.0178559
Gain	chr1	109693455	109698431	2.66264	1.65404	0.617198	1.47448	5.94647	4.84782	1.2043	0.0179563
Gain	chr1	197599360	197609547	4.64661	2.8015	3.34042	7.84992	9.74031	8.6754	1.1898	0.0179612
Gain	chr1	153537900	153539423	1.36029	0.888432	1.00781	0.522711	2.15774	3.84788	1.28201	0.0180287
Gain	chr1	156630050	156632975	1.78471	3.12811	2.49564	3.01953	5.40855	6.47955	1.16601	0.0180633
Gain	chr1	198140808	198145958	1.05964	0.967309	1.32348	0.609235	1.50955	4.63582	1.46332	0.0186743
Gain	chr1	173657242	173658420	1.84737	1.74558	2.0112	1.61751	4.67762	3.9833	1.14133	0.0191314
Gain	chr1	213248536	213249004	1.56666	1.09703	1.20652	1.44118	3.72486	3.3908	1.3414	0.019135
Gain	chr1	70924085	70927729	4.67955	4.67296	3.54099	4.94054	11.0891	8.66448	1.0714	0.0192254
Gain	chr1	109921906	109922512	0.951092	0.803014	0.488305	0.835148	2.99089	2.00587	1.3882	0.0192548
Gain	chr1	235606000	235606665	1.22145	0.731876	1.45652	1.59482	2.62307	2.68629	1.31909	0.0193541
Gain	chr1	161274012	161279130	3.54739	3.74002	2.96354	4.32903	8.26409	7.78114	1.0269	0.0196377
Gain	chr1	66844852	66848278	1.97558	2.2125	3.59326	3.00074	3.79824	5.86583	1.09617	0.0197104
Gain	chr1	155829885	155831089	1.45907	1.64049	1.20752	2.60429	2.33099	6.82552	1.43556	0.0201045
Gain	chr1	174757024	174759474	2.29118	2.27595	1.94588	1.73341	6.16323	4.49112	1.11991	0.0201995
Gain	chr1	246634648	246637792	1.14311	1.35182	0.779665	1.83447	3.43086	2.42556	1.15049	0.0203342
Gain	chr1	166879925	166880421	1.1616	1.47111	1.78914	1.11713	3.92854	3.04978	1.32171	0.0203825
Gain	chr1	70907248	70910502	1.83005	1.43092	1.22517	2.03946	4.99869	3.07644	1.21202	0.0208822
Gain	chr1	172786204	172791633	4.47024	2.49849	6.06895	5.79265	8.25128	9.02406	1.18702	0.0210657
Gain	chr1	121189683	121191022	1.27291	1.23272	0.844562	2.52206	3.34873	2.63317	1.17264	0.0210982
Gain	chr1	167687496	167693237	2.73292	3.00411	2.60915	4.66651	5.47637	7.17058	1.02522	0.0215475
Gain	chr1	66880415	66881576	1.0614	1.35164	1.80874	1.26723	2.77099	3.14345	1.14167	0.0225787
Gain	chr1	66858660	66871732	6.84491	5.87656	7.33155	11.4356	11.1569	18.6936	1.10214	0.0227116
Gain	chr1	154297408	154299208	1.85045	3.72887	3.47105	4.28913	7.62683	6.30518	1.23533	0.0229264
Gain	chr1	160410672	160412369	0.880898	1.1004	1.42821	0.668179	3.77239	1.71215	1.39607	0.0233601
Gain	chr1	10115641	10116316	0.970469	1.24181	1.19581	0.999871	3.74971	2.24222	1.34583	0.0243562
Gain	chr1	121288564	121289451	1.50711	1.09781	1.0317	0.897085	3.7803	2.71427	1.23494	0.025635
Gain	chr1	180579984	180581749	3.56623	3.00542	5.27925	4.19643	6.82755	7.6824	1.02613	0.0263572
Gain	chr1	180760362	180763406	3.49887	2.24105	2.42466	5.2719	7.19956	6.21001	1.11748	0.0263596
Gain	chr1	167273398	167280817	1.54549	1.16055	1.20928	0.920694	2.17435	4.9328	1.25329	0.0267843
Gain	chr1	46558063	46559717	2.33082	1.29261	0.846628	5.4989	4.13947	4.77446	1.17953	0.0269976
Gain	chr1	1874140	1875503	1.40442	0.675	0.49387	1.32733	2.33551	3.0787	1.2581	0.0271076
Gain	chr1	213281727	213286852	4.31556	3.0323	2.20253	7.09217	8.80076	7.89655	1.06748	0.02732
Gain	chr1	8703810	8704329	1.05975	1.66642	1.24364	1.67121	3.62303	3.24938	1.26013	0.0276037
Gain	chr1	197585915	197589317	1.7119	0.843496	1.10063	1.75923	3.55325	2.98646	1.24464	0.0280939
Gain	chr1	67199366	67199938	1.74027	0.94518	1.22266	1.68515	2.7499	4.03295	1.27154	0.0283194
Gain	chr1	175183965	175191846	0.499394	1.22651	0.461513	0.554338	7.63569	0.866944	2.25909	0.0283194
Gain	chr1	16263857	16264684	0.72893	1.27548	1.00883	1.16617	1.98575	2.85094	1.22985	0.0309504
Gain	chr1	62212507	62213067	1.45006	0.675778	1.34488	0.989687	3.35825	2.56897	1.37716	0.0309504
Gain	chr1	154451801	154452436	2.18679	1.57537	1.10155	1.78391	4.36256	4.57113	1.144	0.0314609
Gain	chr1	44742766	44743109	1.29682	0.708473	1.64493	0.701737	2.98728	2.38369	1.46039	0.0333576
Gain	chr1	21444222	21445202	1.73873	1.49061	2.41713	3.93717	3.49176	3.77409	1.07441	0.034154
Gain	chr1	226679498	226680062	1.53269	1.05442	2.05072	1.49538	5.75955	2.24293	1.47311	0.0342771
Gain	chr1	121162871	121164402	1.84992	1.0252	1.33672	1.95387	3.75633	3.13035	1.1679	0.0349243
Gain	chr1	199050208	199051473	2.34225	1.09088	1.21319	0.83898	6.22311	3.19925	1.38009	0.0349687
Gain	chr1	212731907	212732826	1.45469	1.44227	4.21756	1.62681	2.90416	3.83526	1.08558	0.0358421
Gain	chr1	21644742	21646019	1.19093	1.22896	0.569272	1.90776	5.36059	1.73043	1.471	0.0359345
Gain	chr1	198221968	198223107	1.42717	0.570093	1.20546	1.31286	2.13337	3.44387	1.33914	0.0359709
Gain	chr1	226297645	226298937	3.57193	3.30901	4.73058	7.46783	8.68937	6.45707	1.03976	0.0364937
Gain	chr1	179029519	179030921	1.21575	1.54409	1.57486	1.01514	4.12612	2.46179	1.17419	0.036574
Gain	chr1	29044882	29045868	1.11666	1.01513	0.900915	0.904935	3.60935	1.83781	1.27884	0.0370476
Gain	chr1	200608591	200610056	2.47021	1.32996	1.2131	1.97597	4.32266	4.66115	1.1334	0.0380838
Gain	chr1	198146368	198150735	1.02731	0.762538	0.678574	0.602388	1.10573	4.55095	1.51402	0.0387459
Gain	chr1	194264237	194264826	1.24536	1.56051	2.37486	3.0277	3.3093	3.32713	1.14056	0.0396484
Gain	chr1	17239674	17241437	2.40993	2.19521	1.25257	3.53064	6.56344	4.01459	1.10673	0.040656
Gain	chr1	246844799	246845914	1.99868	1.79559	1.49698	4.88852	4.94168	3.67379	1.07416	0.0408238
Gain	chr1	175157031	175162990	1.15357	1.76289	1.22521	1.01662	12.2016	1.15903	2.13369	0.0409581
Gain	chr1	25830558	25832596	2.14925	1.514	1.41401	2.82952	3.98148	4.03372	1.01959	0.0423084
Gain	chr1	102274655	102276078	1.14254	1.06492	1.8544	4.44144	2.38143	2.40804	1.0354	0.0430169
Gain	chr1	16949790	16951313	2.2901	2.13224	1.39678	2.6294	7.19247	3.50549	1.20719	0.0433625
Gain	chr1	197640059	197640553	1.32533	1.09412	1.41532	0.975343	2.97561	3.0119	1.19357	0.0434379
Gain	chr1	109795924	109797044	4.98612	3.18865	3.82189	4.71597	7.91421	10.2186	1.03496	0.0442568
Gain	chr1	181121772	181122665	1.70247	0.848125	0.964494	2.13315	3.94651	2.58488	1.26253	0.0447587
Gain	chr1	102244677	102249533	4.09534	1.85101	8.16633	16.0186	7.55326	7.06513	1.17833	0.0448292
Gain	chr1	66874383	66875360	1.23426	0.913722	1.37758	0.740483	2.24158	2.56612	1.09855	0.0459953
Gain	chr1	44889893	44891928	1.30176	1.09062	0.502913	0.7351	4.9968	1.61098	1.3916	0.047607
Gain	chr1	213291454	213291953	1.04966	1.02902	0.808367	1.20699	2.67182	2.48482	1.20225	0.0476359
Gain	chr1	160640826	160646717	2.46292	4.87631	4.96197	2.26157	6.55201	10.6149	1.11035	0.0497831
Gain	chr20	36543238	36543911	0.272538	0.160709	1.27931	3.72483	4.26906	3.05994	4.11863	1.12725e-11
Gain	chr20	40297199	40300494	1.63213	1.38026	1.39796	0.541973	7.87762	7.07148	2.20528	7.08488e-08
Gain	chr20	35970827	35980301	2.17133	1.84626	1.14323	6.84066	10.8529	7.36398	2.07817	2.52665e-06
Gain	chr20	35982113	35983506	0.602387	0.427365	0.463912	3.35948	3.80875	2.04989	2.47084	6.55264e-06
Gain	chr20	4874818	4878492	0.764038	0.736855	1.24646	2.20049	3.61649	2.62343	1.96693	9.18845e-06
Gain	chr20	4807823	4810802	0.722081	0.772399	1.16643	1.18269	4.35648	2.48482	2.12912	1.35638e-05
Gain	chr20	35983695	35987479	1.08848	0.65105	0.548166	5.17873	5.89153	3.21681	2.30174	1.43994e-05
Gain	chr20	19006064	19007928	0.239199	0.566272	0.245616	0.388307	4.16927	1.58549	2.83349	2.3628e-05
Gain	chr20	564598	565283	1.26235	1.46055	1.72829	0.879729	6.99064	5.03484	2.03366	2.51305e-05
Gain	chr20	16553633	16554575	0.779175	0.890203	1.65731	2.66228	3.16024	3.37282	1.87518	7.46042e-05
Gain	chr20	4855186	4860182	2.20561	1.52278	3.75307	7.3139	7.23882	5.77321	1.68558	0.000201111
Gain	chr20	569108	570487	0.665545	1.04001	1.62064	0.874629	2.82969	3.22306	1.71355	0.000256565
Gain	chr20	4860738	4862497	1.25243	0.861617	1.85251	4.14216	4.14553	3.24721	1.71798	0.00033842
Gain	chr20	43326880	43333137	1.21605	0.787544	0.654478	1.70112	5.83492	2.704	2.00725	0.0003899
Gain	chr20	35988242	35990102	0.74734	0.814856	0.419893	1.99759	3.4972	2.09627	1.74063	0.000602829
Gain	chr20	10650362	10655685	2.9327	2.09555	1.9536	4.45252	8.30618	7.31817	1.51943	0.00063763
Gain	chr20	57266976	57269124	5.15305	4.38512	2.84627	12.3451	12.9111	14.7077	1.42522	0.000644515
Gain	chr20	25665891	25667407	0.847616	1.3388	1.03022	1.67085	4.4483	3.11217	1.68496	0.000658559
Gain	chr20	345290	346374	0.991614	0.723781	0.372519	0.778702	3.91476	2.40466	1.82187	0.00066236
Gain	chr20	40300891	40303368	2.05442	2.06538	1.81594	0.72088	5.14227	6.61816	1.4126	0.00087583
Gain	chr20	12491420	12493662	0.865747	0.688152	0.937028	3.49773	2.6878	2.20454	1.56252	0.000932334
Gain	chr20	35990428	35992304	1.35611	0.779056	0.488092	3.75536	4.89084	2.99184	1.79097	0.000945844
Gain	chr20	61679859	61680506	0.971907	0.54326	0.665322	0.335274	4.01746	2.22407	1.98206	0.000963568
Gain	chr20	31214153	31221569	2.20419	1.70501	1.2461	1.82911	8.58086	4.74049	1.67592	0.00103073
Gain	chr20	12506844	12510768	2.43361	1.67651	2.3616	10.3017	6.58901	5.6217	1.4559	0.00155067
Gain	chr20	61456658	61457890	0.851305	0.834564	0.655609	1.39004	4.88948	1.89435	1.91937	0.00170791
Gain	chr20	48782109	48783602	1.66864	1.74004	1.31662	1.43804	4.58556	4.87317	1.36402	0.00193371
Gain	chr20	32155203	32159310	3.13646	2.90042	0.773996	3.91948	8.79701	7.44599	1.32549	0.00208795
Gain	chr20	48909184	48909582	0.72345	0.678682	1.21559	0.544506	4.20665	2.17967	1.98595	0.00215626
Gain	chr20	49452677	49456522	1.69212	1.02093	2.49418	5.3351	5.13901	3.55989	1.56698	0.00223839
Gain	chr20	632457	635157	3.18667	3.11799	3.28215	4.56698	8.00236	7.93928	1.23398	0.00372086
Gain	chr20	559841	561329	1.35701	1.36397	1.97251	1.76711	5.42913	2.82024	1.57285	0.00443069
Gain	chr20	562345	563433	1.06026	0.745989	1.41037	0.775841	2.98819	2.30456	1.50281	0.00447085
Gain	chr20	55798862	55799373	1.23007	0.528895	0.315768	0.47148	2.87681	2.9119	1.61911	0.00580112
Gain	chr20	35993068	36015615	5.96218	6.01684	3.3186	12.5281	17.045	12.9487	1.22483	0.0058823
Gain	chr20	35963760	35966532	1.42895	1.31833	0.796803	1.63659	6.2999	2.60758	1.62061	0.0059322
Gain	chr20	43159622	43161199	3.44232	3.41496	3.65421	5.09413	6.64244	11.9045	1.29528	0.00745486
Gain	chr20	3451125	3452612	1.3932	1.78346	1.6841	3.24459	3.7523	4.17476	1.20226	0.00983709
Gain	chr20	35174643	35175595	1.32171	0.681958	0.565489	0.96255	2.44416	3.25921	1.42618	0.00984151
Gain	chr20	36021148	36021562	1.32788	0.84827	1.42844	1.74504	2.8889	3.47276	1.53134	0.00988741
Gain	chr20	4775727	4776710	1.46675	1.12831	1.1775	1.49647	3.7596	3.00501	1.31517	0.0108141
Gain	chr20	55829299	55834797	1.36958	0.625402	0.475308	0.913088	2.74083	2.9281	1.3903	0.0118422
Gain	chr20	19049336	19056642	3.42249	2.97588	0.696963	6.80882	13.0932	5.6552	1.46083	0.0122341
Gain	chr20	56273868	56279723	2.21368	1.8913	1.44483	1.69836	3.25812	8.18514	1.34364	0.0189067
Gain	chr20	47940382	47941058	1.35665	1.11998	1.19404	0.784453	2.73224	3.41341	1.22421	0.0219911
Gain	chr20	10490859	10493220	4.45505	4.49413	1.84809	2.55501	9.46992	9.83618	1.00043	0.024176
Gain	chr20	35895583	35907226	4.96479	3.33958	3.35084	7.83236	10.1345	8.96276	1.09276	0.025015
Gain	chr20	55835135	55844300	2.63961	0.437241	0.358647	1.71449	5.92328	6.41672	1.87223	0.0277125
Gain	chr20	32160536	32161130	0.79386	0.86472	0.588726	1.50113	2.53308	2.12984	1.28046	0.0300248
Gain	chr20	3824015	3824699	1.72389	1.22549	1.1801	1.09246	3.15038	3.62747	1.1615	0.0320499
Gain	chr20	62730734	62733967	1.89873	1.72491	1.80803	2.23931	6.43986	2.88897	1.26941	0.0342771
Gain	chr20	49161939	49164471	2.00981	2.07399	1.88289	3.44037	5.08471	3.8062	1.02917	0.035477
Gain	chr20	10488915	10489730	0.932602	1.02875	0.990645	0.68041	2.43473	2.31429	1.16597	0.0361729
Gain	chr20	55844976	55865504	5.30608	2.18308	1.29943	2.27534	11.4147	8.50665	1.2981	0.0369644
Gain	chr20	32163914	32165154	1.14185	1.39652	0.521107	1.90628	2.92582	2.70307	1.06855	0.0369841
Gain	chr20	39932688	39938499	2.56455	1.87767	1.52531	2.70804	6.15891	3.95895	1.09076	0.0410291
Gain	chr20	55803717	55805155	1.623	0.658637	1.08606	0.821993	3.21356	2.7801	1.26667	0.0440413
Gain	chr20	55818464	55828789	3.03686	1.45021	1.01509	1.60371	5.82181	5.06782	1.15915	0.044476
Gain	chr6	157541844	157548151	1.79713	1.33079	1.9735	8.752	13.1304	9.91485	2.78099	1.63551e-10
Gain	chr6	140984465	140985550	0.434942	0.274285	0.942846	0.978038	3.37495	2.76854	3.119	1.53554e-09
Gain	chr6	157549205	157551974	0.397885	0.391038	0.603113	0.993477	3.7593	2.23365	2.88137	3.78371e-09
Gain	chr6	69269121	69270116	0.737713	0.706892	1.02804	0.412024	3.09525	4.51558	2.32987	9.151e-07
Gain	chr6	68837093	68838994	0.73123	0.683392	2.06838	2.56374	8.8787	3.00478	3.03133	9.31895e-07
Gain	chr6	28177924	28180811	1.45382	0.918899	1.44618	2.21504	6.30997	5.31724	2.17758	1.78587e-06
Gain	chr6	81116873	81119668	0.985464	0.629528	0.780611	4.1269	4.06737	3.60814	2.16568	1.89103e-06
Gain	chr6	67089866	67090794	0.734423	0.262341	1.94333	0.935448	7.22692	2.67472	3.2672	2.18055e-06
Gain	chr6	37750906	37751917	0.907561	0.829507	0.585773	1.64589	3.21556	5.15624	2.18999	4.95542e-06
Gain	chr6	108858305	108859076	0.509873	0.491077	0.383939	0.187615	2.83972	2.60713	2.36602	5.73692e-06
Gain	chr6	109343240	109347827	1.04669	0.997476	5.05082	0.77344	3.19546	9.35327	2.4823	8.77845e-06
Gain	chr6	116486528	116488043	0.415433	0.660909	0.426579	0.318466	3.11812	2.08161	2.21935	1.2463e-05
Gain	chr6	108854463	108857747	0.615097	0.445141	0.418333	0.367424	4.34824	1.81539	2.47469	1.89437e-05
Gain	chr6	139013627	139014510	1.12803	0.735187	1.12781	2.23921	3.8749	4.1601	2.02022	3.00831e-05
Gain	chr6	107190787	107195259	1.06186	1.19263	1.24095	0.615232	5.43717	3.52752	1.88686	3.92082e-05
Gain	chr6	109062951	109063888	0.811304	1.01043	0.804345	0.437501	6.17159	2.86099	2.23383	7.43518e-05
Gain	chr6	107141768	107143736	1.49266	2.02167	2.36749	1.69187	5.79311	6.24675	1.65617	0.000101109
Gain	chr6	141031177	141033217	2.41715	1.35331	3.88143	8.03081	6.74677	7.4508	1.80668	0.00012658
Gain	chr6	108862048	108865168	1.64798	2.23854	1.75263	1.03644	5.42184	7.08583	1.57928	0.000244453
Gain	chr6	80912052	80914203	1.04868	0.880836	1.32724	1.60408	3.0243	3.12912	1.55284	0.000421413
Gain	chr6	109333443	109342790	1.7601	1.7294	4.93483	1.44611	4.05275	7.71123	1.63184	0.000476074
Gain	chr6	116419705	116420497	0.728011	0.409777	0.47571	0.913231	2.28937	2.06807	1.96644	0.000553333
Gain	chr6	108895558	108899274	2.28739	1.95246	2.39226	1.25342	6.86557	5.44828	1.43049	0.00127846
Gain	chr6	659494	660170	0.775229	0.679985	0.716425	0.285256	3.23821	2.05539	1.83161	0.00143312
Gain	chr6	44272744	44273294	0.857254	1.1795	0.733545	1.92768	3.35703	3.29205	1.70019	0.00143666
Gain	chr6	4878535	4881441	0.72216	0.76385	0.639574	0.755665	1.49648	4.09435	1.80269	0.00159793
Gain	chr6	157279288	157281491	1.15491	1.06892	1.54044	1.79624	2.82861	3.48371	1.39582	0.00166179
Gain	chr6	109328142	109332939	2.61977	2.83888	5.53737	2.59107	6.09692	8.92318	1.3471	0.00183242
Gain	chr6	37995540	37996188	0.929976	0.917946	1.24556	1.67379	4.59185	2.25893	1.82845	0.00196666
Gain	chr6	108906731	108908138	0.950508	0.980859	0.918598	0.565775	2.53014	3.12367	1.42071	0.00242302
Gain	chr6	109323388	109325814	0.821736	0.847975	2.00954	0.507263	1.83479	2.95885	1.43414	0.00268846
Gain	chr6	28186332	28187137	2.66973	1.54547	1.33725	3.92346	7.64981	5.64171	1.56796	0.00300798
Gain	chr6	80918574	80922866	1.72376	1.21741	2.15288	2.05804	4.29274	3.79697	1.35759	0.00314069
Gain	chr6	68607507	68608347	0.717663	0.869374	2.56319	2.61203	2.40309	2.27504	1.52141	0.00388455
Gain	chr6	53301877	53302522	1.46237	0.754534	0.875939	1.08367	3.34057	3.30796	1.56658	0.00394989
Gain	chr6	139277285	139280390	1.67283	1.20314	1.14514	1.87305	4.30107	3.55203	1.35273	0.00399229
Gain	chr6	15661626	15663393	4.77928	3.67594	3.84066	13.8858	11.7216	10.6251	1.2902	0.00408069
Gain	chr6	40994909	40996427	1.20929	1.42617	1.66747	2.89232	2.90901	4.48216	1.36474	0.00433262
Gain	chr6	156956571	156959688	2.2976	3.09181	8.7802	2.87231	5.26226	10.7027	1.44882	0.00454865
Gain	chr6	28248600	28250037	0.857684	1.69482	0.449717	1.52762	3.21579	4.26808	1.46087	0.0046775
Gain	chr6	111878276	111881790	2.77719	2.81194	3.00502	6.07786	6.99701	6.70159	1.19192	0.00538069
Gain	chr6	80872947	80875808	2.28306	1.54226	2.17485	4.25946	6.23564	4.41919	1.384	0.00549613
Gain	chr6	34211903	34212819	0.829884	1.47652	2.11568	2.10598	3.32456	3.33296	1.44189	0.00549613
Gain	chr6	111885682	111888455	3.22579	3.20189	3.81745	3.35903	6.92739	9.01128	1.19404	0.0058823
Gain	chr6	2840736	2844202	2.68697	2.83525	4.32124	6.07845	7.21244	6.40735	1.19329	0.00593348
Gain	chr6	10518305	10520228	3.43703	2.9838	2.50689	2.15802	9.45372	7.11609	1.26703	0.0064874
Gain	chr6	81198670	81199685	1.34307	0.586365	0.8752	2.73235	2.79832	3.22831	1.50002	0.0066054
Gain	chr6	80889674	80892504	1.6314	0.860878	1.56096	2.39607	5.26335	2.79114	1.60522	0.00746573
Gain	chr6	35354166	35355499	3.52116	3.4915	2.54508	4.66871	7.72901	9.38792	1.17718	0.00763418
Gain	chr6	161412229	161413840	2.27904	2.5198	4.04518	5.55574	4.88738	7.21399	1.22697	0.00789055
Gain	chr6	157292728	157300118	1.66517	1.85756	1.42548	3.01461	4.11087	4.21925	1.13412	0.00802601
Gain	chr6	42104193	42105231	1.84372	1.17283	1.65978	2.81127	4.68151	3.46775	1.38456	0.00836685
Gain	chr6	35310154	35311782	3.81782	3.57402	3.92026	9.46918	8.57931	9.06067	1.14794	0.0087633
Gain	chr6	142799122	142800135	0.724617	1.33528	1.27553	0.642774	2.8714	2.8916	1.39683	0.00950858
Gain	chr6	27129192	27129867	1.78566	1.52222	2.07273	0.749904	5.32054	3.85956	1.34755	0.00956171
Gain	chr6	28169576	28170752	1.62755	0.759236	0.915737	2.97389	3.87069	3.25116	1.4568	0.0096377
Gain	chr6	68598423	68599747	0.514927	0.98099	2.7454	4.37248	3.05056	1.55653	1.59428	0.00966372
Gain	chr6	155668534	155675668	4.03828	3.03244	6.03867	5.13921	7.59016	9.76515	1.17137	0.0100509
Gain	chr6	116421088	116423125	3.28341	3.80015	3.02774	5.28279	8.40386	8.19332	1.13022	0.0101848
Gain	chr6	131455926	131457311	2.63172	1.69979	1.92468	3.64012	4.05316	8.31859	1.40215	0.0124475
Gain	chr6	35330018	35332148	2.5244	1.29615	1.63115	7.49907	4.48471	5.92345	1.31843	0.0144089
Gain	chr6	157694167	157696568	2.91693	3.30319	3.14103	5.65807	7.11608	6.88963	1.06456	0.0171626
Gain	chr6	155849666	155851454	1.30547	1.10497	2.71112	1.36284	2.46997	3.29179	1.15232	0.0171782
Gain	chr6	157040429	157042616	4.40157	3.81191	5.04921	4.68894	8.37567	10.2663	1.06624	0.0179048
Gain	chr6	132675173	132677335	2.26868	2.0657	2.44167	1.27228	6.23954	4.22752	1.18224	0.0179072
Gain	chr6	16129228	16132315	3.44165	3.20077	4.18843	5.98803	7.49864	7.3064	1.04372	0.019075
Gain	chr6	139337194	139338668	1.86804	2.03784	2.70369	1.45657	4.73752	4.19471	1.10911	0.0191239
Gain	chr6	34949613	34950173	1.02908	1.01367	0.816532	0.301209	3.05295	2.48039	1.34375	0.0195564
Gain	chr6	1637260	1638277	1.18576	1.03742	0.449975	0.924804	4.10511	2.02593	1.39428	0.0216369
Gain	chr6	10759213	10759850	2.01541	2.33443	2.11172	2.72424	6.22803	4.36206	1.21788	0.0228358
Gain	chr6	26321307	26322972	2.40993	1.80421	4.51249	1.60835	4.35887	5.32461	1.08577	0.0239446
Gain	chr6	26520017	26523751	4.17335	4.06735	3.00838	3.66459	7.36441	11.0836	1.04253	0.0253191
Gain	chr6	155661514	155665136	1.67314	1.21084	3.16831	2.41864	2.58112	4.39627	1.14599	0.0259812
Gain	chr6	4136208	4137103	1.8451	2.23647	1.26307	2.23616	5.27575	4.29851	1.11007	0.0275419
Gain	chr6	167000509	167001712	1.50387	1.0346	2.84226	6.13519	2.58898	3.40527	1.14513	0.0276454
Gain	chr6	83667054	83668009	1.81165	1.38796	4.00237	6.3632	2.75896	5.01642	1.18662	0.0286429
Gain	chr6	5031133	5031694	1.72764	1.59007	2.8288	2.14766	3.65703	4.37717	1.14013	0.0321748
Gain	chr6	149531615	149532224	2.0649	2.26402	3.04794	2.09739	5.1662	4.8067	1.09939	0.0328021
Gain	chr6	83820160	83822428	1.3647	1.18152	1.49632	1.95756	4.4082	2.05882	1.27374	0.032856
Gain	chr6	157175236	157175855	0.59255	1.13559	0.869211	1.36273	2.65193	2.04396	1.31895	0.0334567
Gain	chr6	137210522	137210962	1.07108	1.47371	2.07743	2.73693	3.18463	2.92995	1.26483	0.0347824
Gain	chr6	108939868	108941042	1.31766	1.31364	1.12369	0.431434	2.62372	3.57391	1.06799	0.0354489
Gain	chr6	160121750	160122907	0.906442	1.16923	1.07038	1.25076	2.66224	2.16724	1.11542	0.0375529
Gain	chr6	28616135	28617243	2.22426	1.56274	0.753212	1.30603	3.55205	5.06374	1.07631	0.0410928
Gain	chr6	67242630	67246764	2.22751	1.59791	4.31389	7.41414	6.75142	3.01664	1.26286	0.0413928
Gain	chr6	2932658	2933465	2.24092	2.17842	2.36774	0.776774	4.32416	5.19721	1.01289	0.0436869
Gain	chr6	8030684	8032118	1.35322	1.4153	0.957647	2.8093	3.10316	2.80516	1.00467	0.04597
Gain	chr15	57111225	57113833	0.653774	0.560478	0.650659	1.04553	5.72434	5.43822	3.08805	2.68756e-13
Gain	chr15	57157493	57162253	0.981093	0.830412	0.854606	2.8343	5.16582	5.50616	2.44497	1.22594e-09
Gain	chr15	56787891	56791063	1.09167	0.733952	0.934135	1.52918	5.23582	5.79504	2.49281	9.27001e-09
Gain	chr15	56783639	56786560	0.592724	0.389232	0.645513	0.528728	3.25895	2.55115	2.43724	1.26019e-07
Gain	chr15	68176557	68177819	1.24663	0.771859	2.00545	0.802747	9.13986	5.01686	2.80526	2.04773e-07
Gain	chr15	57123920	57135326	1.90939	1.25818	0.911807	4.13933	7.19196	8.26022	2.16291	4.98101e-07
Gain	chr15	57051577	57053076	0.52483	0.43327	0.413165	0.852938	2.51197	2.43512	2.26751	1.24006e-06
Gain	chr15	57114136	57115655	0.50066	0.6948	0.336819	1.44521	2.47892	3.25315	2.229	1.46973e-06
Gain	chr15	56905342	56909704	1.08863	0.589627	0.839925	1.05124	5.06393	3.98664	2.31258	1.89103e-06
Gain	chr15	56898476	56904916	4.00895	2.5856	1.12953	8.76242	16.0821	13.73	2.06604	3.75668e-06
Gain	chr15	43808178	43811915	2.54131	2.64419	1.67238	1.38846	11.528	9.22667	1.90427	3.94526e-06
Gain	chr15	57104091	57105530	0.747153	0.733401	0.7672	1.12317	3.94874	2.89896	2.1581	4.52424e-06
Gain	chr15	56821525	56832510	5.40547	3.86004	3.42645	11.2107	17.785	19.6687	1.89834	5.51067e-06
Gain	chr15	57177021	57181854	3.36026	2.3976	2.69233	6.25217	10.0552	12.4087	1.83701	1.62613e-05
Gain	chr15	56819484	56820829	0.623869	0.824856	0.860816	1.11194	2.67213	2.89834	1.89515	4.23423e-05
Gain	chr15	25012341	25012760	2.43671	14.0555	5.2608	12.932	853.336	42.6561	5.54757	4.86067e-05
Gain	chr15	57005412	57014314	3.67847	1.22881	1.38012	9.53606	14.8282	12.7158	2.36548	7.50266e-05
Gain	chr15	91073045	91073692	0.769426	0.50147	1.2059	1.71362	2.22018	3.64287	2.17088	8.19284e-05
Gain	chr15	57598047	57599292	1.30576	0.891056	1.29754	4.10724	3.57387	4.7064	1.80433	0.000120879
Gain	chr15	56977328	56978359	1.14425	0.708473	0.861631	1.05261	3.48516	3.53942	1.85488	0.000149569
Gain	chr15	57056915	57058107	0.725875	0.726355	0.609832	0.951021	4.16333	2.18697	2.07243	0.000154917
Gain	chr15	66087963	66089706	1.45953	1.63035	1.34419	2.32539	6.12804	4.5593	1.70005	0.000162388
Gain	chr15	72529338	72530812	1.28094	1.30348	1.2605	0.736467	4.45884	4.12733	1.64197	0.000188036
Gain	chr15	41228665	41230323	1.43941	1.10995	2.01401	4.10332	3.48942	6.71006	1.85183	0.000206544
Gain	chr15	63712470	63713439	1.10918	1.06084	0.611136	0.920795	3.67261	4.17552	1.70802	0.000214018
Gain	chr15	57054476	57055235	0.690565	0.570093	0.744548	1.30228	4.14655	1.99439	2.16295	0.00028693
Gain	chr15	57149163	57149771	0.689432	0.711446	1.10614	1.38734	3.43104	2.20329	2.04298	0.000357526
Gain	chr15	34207351	34208188	0.56366	0.840172	0.192928	0.518515	5.72265	1.83841	2.44351	0.000373214
Gain	chr15	45475079	45476069	0.794394	0.983712	0.897279	1.02308	3.21457	2.93364	1.72156	0.000387875
Gain	chr15	35851667	35852418	0.942181	0.792217	0.859964	1.02722	3.143	3.03994	1.75107	0.000519051
Gain	chr15	57136574	57137777	1.41669	0.74221	0.469981	1.36337	4.26754	3.75612	1.77771	0.000614512
Gain	chr15	57344319	57345438	0.890336	1.03966	0.336819	2.78038	3.05841	3.23914	1.59476	0.000672695
Gain	chr15	42663528	42664072	1.01114	1.49061	1.58212	1.55026	4.46247	4.96964	1.71818	0.000691332
Gain	chr15	78863535	78864871	1.158	0.810154	0.584458	0.541655	4.27857	2.67624	1.74865	0.000693195
Gain	chr15	41224068	41224697	0.79141	0.773697	0.556019	1.45605	3.75164	2.32705	1.89979	0.000814457
Gain	chr15	57174508	57175941	1.11627	0.717585	0.281857	0.892194	2.43649	4.02007	1.68967	0.000970424
Gain	chr15	79055997	79057261	0.788282	0.813452	0.25561	1.31671	1.92256	3.45714	1.64173	0.00127107
Gain	chr15	31743684	31746127	1.71794	0.952876	0.848939	0.493857	4.89145	3.89397	1.59377	0.00168891
Gain	chr15	56756063	56758020	3.0691	2.33729	1.2248	4.0685	7.54011	7.70319	1.37786	0.00173762
Gain	chr15	57067654	57068543	1.85754	0.912789	0.756897	1.2748	5.77317	4.0483	1.74064	0.00182671
Gain	chr15	51168877	51169788	1.03585	1.78154	2.24546	1.61461	3.6057	4.90425	1.53602	0.00211726
Gain	chr15	77195976	77198277	1.86951	1.25869	1.82602	1.3108	3.86884	5.22438	1.42224	0.00259266
Gain	chr15	57095015	57098581	2.65578	2.14084	1.67701	4.1891	7.91293	5.75402	1.40283	0.0026332
Gain	chr15	68171429	68175978	2.56648	2.35085	2.09642	1.99485	10.3214	5.13347	1.56052	0.00342194
Gain	chr15	56284737	56286422	2.97279	3.29257	2.74889	3.55081	8.65496	7.56057	1.26748	0.00394592
Gain	chr15	40366871	40368181	1.88154	1.38392	2.117	2.83564	5.35629	3.96131	1.44202	0.00406715
Gain	chr15	94779682	94786059	1.79798	1.68132	2.42079	1.44581	4.18375	4.47252	1.19243	0.00499908
Gain	chr15	68644272	68645517	1.6006	0.84759	1.05966	1.31742	3.73882	3.72922	1.48511	0.00522045
Gain	chr15	43732787	43733968	0.932439	1.64951	1.9833	1.32748	3.4486	3.91012	1.39292	0.00566967
Gain	chr15	57199212	57200105	1.26217	0.666384	0.813792	1.51211	3.75493	2.44591	1.59858	0.00714873
Gain	chr15	56930974	56933150	1.50675	0.609504	1.08921	1.46369	3.44587	3.11601	1.52649	0.00951677
Gain	chr15	56838896	56839958	0.98745	1.06993	0.887201	1.61234	3.54464	2.17392	1.40566	0.010455
Gain	chr15	42074566	42076021	1.60405	1.50648	0.795782	2.40403	4.77582	3.34495	1.28047	0.0104555
Gain	chr15	66881104	66881445	1.61132	1.34605	0.787882	2.39986	4.40697	4.28668	1.4438	0.0106286
Gain	chr15	42894189	42902157	4.35986	3.99276	7.04324	7.43973	7.96928	11.643	1.11016	0.0141624
Gain	chr15	45479845	45480589	0.91581	0.617919	0.687202	1.91174	2.94264	1.63431	1.52667	0.0143582
Gain	chr15	56911816	56912857	2.14062	1.11748	0.749924	2.10817	4.01056	4.62625	1.29399	0.0150985
Gain	chr15	52129070	52130872	1.36811	1.42681	1.71866	3.85593	2.90676	3.80372	1.13841	0.0152179
Gain	chr15	77002787	77004808	1.181	0.749974	0.759593	0.787944	1.60937	4.03076	1.45468	0.0164098
Gain	chr15	64939258	64940527	1.26042	1.06612	0.848679	4.2007	3.20964	2.54352	1.22628	0.0166535
Gain	chr15	68230184	68231360	1.24853	1.88659	1.48807	1.86637	3.89979	3.65228	1.19795	0.017521
Gain	chr15	56979093	56980399	1.62629	0.787312	0.494792	1.66226	3.77398	3.02285	1.34743	0.018636
Gain	chr15	85531360	85532469	0.803793	1.36617	1.60217	0.891648	4.41292	1.99233	1.49022	0.0192298
Gain	chr15	67850688	67859437	5.18232	3.9799	4.57304	14.3652	10.2097	10.4078	1.05793	0.0201041
Gain	chr15	68199255	68200551	1.11278	1.73291	1.78667	1.06088	3.93513	2.9312	1.22371	0.0203395
Gain	chr15	31195461	31197702	1.91954	2.3311	0.841297	1.44279	4.33906	4.84329	1.05072	0.0215101
Gain	chr15	91458715	91459588	1.77145	0.836549	3.51464	7.29164	5.1342	2.70089	1.48068	0.0226703
Gain	chr15	64682198	64682849	1.24768	1.16292	1.36381	2.18443	3.20476	3.01075	1.22429	0.023942
Gain	chr15	75964557	75966862	0.944512	1.16256	0.397289	2.38676	7.4866	1.21763	1.99051	0.0239448
Gain	chr15	78857073	78858696	2.58537	0.950447	1.74217	2.76477	4.72471	4.988	1.34963	0.0287208
Gain	chr15	57016416	57018323	1.63665	0.638665	0.946201	3.84617	2.63908	3.72462	1.35462	0.0288863
Gain	chr15	57505530	57515056	1.88128	1.06589	0.811732	2.16389	2.80448	4.5252	1.18772	0.0297173
Gain	chr15	94865828	94866444	1.02074	1.66778	1.61586	1.13461	2.94241	3.66481	1.16603	0.0347241
Gain	chr15	63339993	63341060	1.4251	1.64809	1.61471	1.92123	3.84878	3.00133	1.07447	0.0414895
Gain	chr15	57325322	57326179	1.65156	0.915271	0.628101	2.50401	2.9144	3.41735	1.15014	0.0425934
Gain	chr15	31564413	31566227	2.38559	1.98433	3.44428	4.60185	3.64245	6.18809	1.04423	0.0434666
Gain	chr15	50682892	50683685	1.65249	1.80757	1.83257	2.46262	4.27098	3.31726	1.07936	0.0439539
Gain	chr15	51177317	51178226	2.24927	1.81521	2.19118	2.33439	4.25354	4.42352	1.00899	0.0485915
Gain	chr15	57327713	57330127	1.95589	1.48012	0.959552	2.38899	4.24099	3.2102	1.02886	0.0485915
Gain	chr15	74607599	74608726	1.65172	2.04056	0.214991	1.28403	4.76764	3.34834	1.05404	0.0495679
Gain	chr11	10328896	10330206	0.980803	1.01212	0.863244	1.34417	8.30879	8.43436	2.95624	1.92643e-12
Gain	chr11	33069961	33075236	1.27328	0.975187	1.14401	4.02177	5.85619	7.39888	2.43588	4.42786e-09
Gain	chr11	10175842	10176825	0.400023	0.467835	0.547674	0.367984	3.16781	3.18178	2.85074	6.55575e-09
Gain	chr11	24285874	24287396	0.585824	0.355606	0.690004	0.507204	3.73354	2.88781	2.74943	2.59602e-08
Gain	chr11	75272903	75274605	0.90913	1.22438	2.53158	2.05535	5.37044	6.0552	2.31437	4.94088e-08
Gain	chr11	10326010	10326871	0.213098	0.219902	0.312593	0.252039	2.94061	1.58544	3.38346	4.94809e-08
Gain	chr11	24114113	24114900	0.266411	0.618565	0.444533	0.336976	3.91228	3.09026	3.01237	6.19514e-08
Gain	chr11	33081021	33083252	0.740687	0.667279	0.603619	1.74126	3.20749	3.62926	2.15865	3.47766e-07
Gain	chr11	10276449	10278072	0.759452	0.66698	0.564131	0.639168	2.86857	5.33991	2.43867	6.17527e-07
Gain	chr11	10296324	10297129	0.586038	0.772737	0.601762	0.479201	3.61241	4.10026	2.3601	8.37959e-07
Gain	chr11	81681485	81682312	0.316926	0.686796	0.55323	0.495623	4.34382	2.52083	2.8015	1.33103e-06
Gain	chr11	121191836	121200998	2.7493	2.61839	2.19964	3.8279	11.2037	10.0391	1.88031	2.19851e-06
Gain	chr11	10131155	10132569	0.741809	0.497572	0.666498	0.494737	2.7597	2.96773	2.14685	5.3215e-06
Gain	chr11	77112347	77114204	0.889781	0.801597	0.884649	3.58588	3.26318	3.83823	1.96166	5.42954e-06
Gain	chr11	9784359	9788244	1.05344	0.933773	0.901421	1.23618	3.7639	4.03479	1.85602	5.72384e-06
Gain	chr11	63684154	63687558	1.31015	1.22474	2.70643	2.11267	4.15476	6.06427	1.90187	6.41322e-06
Gain	chr11	10331726	10332641	0.658902	0.502565	0.76483	0.421655	3.17861	2.5228	2.27716	9.06794e-06
Gain	chr11	118400851	118402029	1.44673	1.63074	0.959892	5.32344	4.91005	7.90337	1.94169	1.75333e-05
Gain	chr11	9229752	9231646	0.872408	1.02887	0.810499	0.509546	2.91025	6.07109	2.1232	2.0426e-05
Gain	chr11	121204058	121212945	3.05285	2.64152	1.23692	7.15393	9.73129	9.80173	1.6676	3.31685e-05
Gain	chr11	65324156	65326746	2.82569	2.52922	2.05914	2.38509	8.4743	9.82036	1.67277	3.82573e-05
Gain	chr11	23518257	23519795	0.579734	0.439886	0.560271	0.282336	4.11762	1.663	2.46117	4.08639e-05
Gain	chr11	6440068	6440927	1.3731	0.724217	0.908629	3.17185	6.53219	3.72723	2.17902	8.89348e-05
Gain	chr11	24163382	24164901	0.690565	0.391939	0.407729	0.667019	5.00291	1.66744	2.59576	9.53337e-05
Gain	chr11	10314851	10316603	3.75734	4.92774	5.27229	5.12264	14.0104	14.0896	1.59818	0.000118006
Gain	chr11	87003001	87009776	2.42432	1.91426	1.36796	6.466	7.07225	6.9308	1.57662	0.000159609
Gain	chr11	46330484	46331720	1.42133	1.61995	0.43566	1.13186	8.2797	4.23845	1.96312	0.00019618
Gain	chr11	45201704	45202513	0.93951	1.33725	1.63004	0.923867	5.07469	3.55851	1.87304	0.000238702
Gain	chr11	18609006	18610784	1.56357	1.91793	0.46954	4.1522	4.31306	8.4224	1.78181	0.000240093
Gain	chr11	9235828	9238270	1.75086	1.37448	0.904435	1.03753	4.10825	6.86555	1.69826	0.000270216
Gain	chr11	59539367	59540676	2.94466	3.03868	6.41757	4.23828	9.98861	8.34596	1.51439	0.0004865
Gain	chr11	130029513	130054024	5.48125	3.53848	7.34099	17.4332	11.8839	16.6047	1.53427	0.000961611
Gain	chr11	9821310	9826687	1.31256	1.22859	2.00413	0.731644	2.59231	8.63542	2	0.00102608
Gain	chr11	93861108	93862953	2.54454	2.2884	4.29144	4.58995	6.25333	7.10717	1.36221	0.00146785
Gain	chr11	120195788	120198209	1.71187	1.86716	3.59348	4.03658	4.93588	4.90398	1.34448	0.00166145
Gain	chr11	58414765	58415776	0.855701	1.17737	0.772155	0.238535	5.95724	2.28348	1.97052	0.00176498
Gain	chr11	9284755	9287356	3.62056	3.65291	3.1792	5.251	9.0967	10.1226	1.29759	0.00181821
Gain	chr11	74171669	74171994	0.724458	0.996788	0.743896	0.740483	3.88774	3.12508	1.91159	0.00183355
[truncated: 2,330 more rows]

## Sheet: Table S2
Table S2: Differentially expressed genes in CREBBP-WT vs CREBBP-R1446C
	FPKM						WT vs R1446C
Gene Symbol	WT1	WT2	KO1	KO2	R1446C-1	R1446C-2	Fold Change	Q-value
ROBO2	0	0	0.0700979	0.0641457	3.54897	0.851056	10.9425	1.31403e-15
SNX7	0	0	0	0.0145222	0.858069	1.53915	10.4187	1.57832e-30
ADAMTS19	0	0.00595326	0	0	1.44487	4.35175	9.64001	2.11612e-36
MAB21L1	0	0	0.195474	0	0.300261	0.579511	9.34895	3.41542e-22
SCN3A	0	0.00627075	0.00685007	0.0250736	1.80476	0.380051	8.59915	1.9749e-15
TRIM44	1.13113	1.30972	773.66	921.698	215.196	490.811	8.2847	4.5282e-70
C11orf85	0	0.0275864	0.030135	1.40638	1.21463	6.63667	7.97918	7.0497e-18
PCDH9	0	0	0.0426981	0.0195363	0.162656	0.108502	7.93965	5.24636e-09
EPHA10	0	0	0.0126802	0.203061	0.162054	0.134258	7.79941	9.36674e-09
KIAA0040	0.569255	2.23757	4.06434	7.49046	201.665	266.446	7.5953	7.86789e-60
TMSB4Y	0	0	0	0	0.0899541	0.200224	7.42872	3.80281e-07
MBL2	0	0	0	0	0.121389	0.074708	7.34287	6.09293e-06
MTRNR2L10	0	0	0	0	0.208729	0	7.34281	0.00492049
PTPRK	0	0	1.84725	7.2517	0.0429823	0.351827	7.26585	4.01482e-05
BMP7	1.51752	0.263566	2.0154	5.24739	110.765	112.529	7.2576	8.64789e-52
TNNT1	0	0	1.1071	6.83839	5.71396	2.81329	7.24961	2.57033e-05
ZDHHC8	0	0.0185029	0.0202122	0.305183	0.218573	2.5467	7.10705	1.15749e-10
SEMA6B	0	0	0.0446098	0	0.0730919	0.125955	6.94328	2.92186e-05
SPARC	0	0	0	0.00941163	0.0454993	0.0174236	6.94075	0.000347649
MAGI2	0	0	0	0.0111446	0.0419044	0.0309477	6.8494	0.000127931
RBMS3	0.0595575	0.142231	1.10172	2.04219	11.7751	6.85547	6.80138	1.02455e-33
C8orf22	0	0	0	0	0.434522	0.48671	6.61753	0.000311908
ADM	0	0	0	0	0.0105863	0.0478872	6.5772	0.000844152
ARHGAP42	0	0	0	0	0.0225425	0.0233077	6.56462	0.000468516
MTRNR2L2	0	0.0086096	0.00940499	0.0172128	0.656458	0.0557651	6.39385	7.22359e-06
LRRC17	0	0	0.0140436	0.0128511	0.062127	0.0535298	6.30269	0.00212294
NEURL	0	0	0	0.0187555	0.0134328	0.0462957	6.28685	0.00245306
GRPR	0.21219	0.0921339	0.150968	0.230249	12.9863	5.05114	6.25053	7.04794e-18
ADD2	0.0346647	0	0.328842	1.42937	1.60023	0.44567	6.18213	1.32459e-09
SPARCL1	0.585211	0.261801	0.622444	0.35407	31.6376	13.7082	6.10942	1.98729e-27
DCTD	11.0286	1.06415	30.8051	74.1965	313.411	376.629	6.10723	2.19593e-29
TRPC7	0	0	0.0293673	0	0.057741	0.0746262	5.99016	0.00553593
HPGD	0.127645	0	0.484357	0.221614	2.26178	4.66684	5.88094	7.15633e-16
MC4R	0	0.0114908	0.0271969	0.0746625	0.331125	0.230369	5.77112	7.00919e-17
MAP1LC3C	0.0165371	0.0430828	0.0313753	0.0143556	1.75043	0.651119	5.62259	3.3956e-12
NCKAP1	2.43813	1.34737	11.4143	13.9497	48.4284	103.02	5.50556	1.65179e-93
RAB3B	0.0392545	0.011363	0.0248256	0.0567939	0.878601	1.00936	5.46799	1.71455e-22
KIF5A	0.0547969	0.0475862	0.0433187	0.194238	1.5118	2.40338	5.45576	3.19757e-38
ZNF32	0.060965	0.0794139	0.867505	0.899688	1.96151	3.1597	5.31615	1.23879e-19
TCEAL8	0.464361	0	10.352	11.3653	6.67631	8.87223	5.31571	1.08866e-08
MTRNR2L8	0.0164372	0.0237904	0.015593	0.0475631	1.17524	0	5.30718	0.0064307
FRK	0.720821	0	0.683798	2.50294	8.06676	17.9554	5.29	4.83299e-11
P4HA2	0	0.0438371	0	0.0146069	0.572769	1.06814	5.27645	2.74727e-18
C12orf39	0.414949	0.56304	0.418238	1.44085	8.58605	25.3196	5.23961	1.15525e-29
SLITRK6	0.465858	0.634169	2.65158	2.62317	12.4289	20.2647	5.08895	8.85073e-126
MYBPH	0.31858	0.642242	0.129522	0.0395079	9.97423	18.8976	5.07645	2.0009e-56
MB21D1	0.0318027	0.0276177	1.15397	0.14839	0.0370735	1.97409	5.06994	0.000103279
LAMP3	0.795281	2.54382	0.389791	0.736397	38.604	47.1504	4.90934	1.08496e-34
GPHA2	0.0236563	0	0	0.112946	0.0992773	0.551253	4.82433	4.29647e-06
ITGAD	0	0.047272	0.0114754	0.00525049	0.406125	0.845654	4.79322	1.16976e-14
KISS1R	0.0344374	0.0398743	0.0871162	0.448419	1.04912	0.59033	4.72266	8.2514e-12
SNORA77	0	0.016945	0.0740418	0.118571	0.236565	0.266546	4.7191	0.000295167
GFI1	0.204488	0.142064	2.6479	0.621297	3.07033	4.75689	4.71049	3.53892e-30
DGAT2L6	0	0.0071708	0	0	0.107811	0.0928917	4.65766	0.000752282
IGSF11	0.016902	0.0733894	0	0	0.252202	1.95572	4.61877	2.84626e-07
ZFYVE9	0.55074	0.239134	0.174151	0.132803	6.27751	10.203	4.60135	2.56858e-22
C2orf55	0.0105524	0	0.0100104	0.0274811	0.0934899	0.131428	4.56437	1.48985e-06
LOC286467	0.220792	0	0.139634	0.191667	0.583407	4.25795	4.54914	1.73105e-06
AGR2	0.0146886	0.0255114	0.0418025	1.12846	0.431501	0.395395	4.54062	1.66867e-13
NBEA	1.23224	1.0255	3.42568	3.13479	27.0535	12.8032	4.49125	2.20876e-22
USP27X	0.00798304	0	0.00757301	0.0207899	0.0967837	0.0449027	4.39074	0.000282569
KIF21A	0.0437902	0.0633798	0.595422	0.133048	1.41573	0.175935	4.31791	1.35784e-05
WNK2	1.0579	1.85651	0.648132	11.3645	22.0337	22.6328	4.18538	3.53429e-38
SLC26A10	0	0.112608	0.0702922	0.305536	0.863788	0.952649	4.12175	2.48913e-11
TEAD4	0.0448452	0.038944	0	0	0.3764	0.97294	4.10942	1.10896e-07
LOC149950	0	0.0228972	0.0250125	0.125887	0.159831	0.233054	4.0677	0.000295167
MIXL1	0.0268727	0.210029	0.178447	0.186623	1.92971	1.55471	4.06298	7.72354e-11
PON2	1.39024	0.517413	0.150724	16.4648	10.0203	16.4375	4.01236	1.18663e-22
C3orf32	0.013661	0.0118634	0.0259188	0.0711538	0.0700708	0.323826	4.00356	7.33893e-06
TNNI1	1.24727	2.63511	0.0176598	0.0969616	23.2117	28.9375	3.97589	1.13654e-43
GPD2	0.38949	0	6.56546	3.25107	0.656616	5.13993	3.97327	0.0022983
FBXW12	0	0.0103015	0.0112532	0.0102977	0.0995656	0.0524258	3.94251	0.00385128
EEF1A2	0.605134	1.05101	0	41.4994	14.1085	7.53684	3.93818	3.37051e-07
PLXNB1	0.106617	0.0644083	0.0615638	0.173033	0.881897	1.34093	3.91927	1.36976e-18
TRIM72	0	0.0321494	0.105359	0.0482062	0.310729	0.148739	3.9064	0.00559834
B4GALNT1	0.118787	0.046889	0.12293	0.496838	0.976874	1.07164	3.89227	1.80059e-14
CECR2	0.898784	0.745669	0.487212	0.264718	5.91977	15.9659	3.88523	3.32814e-33
PPP1R1C	0.0169078	0.0587318	0.120296	1.04944	0.307478	0.71327	3.8559	7.91621e-11
SRGN	0.268198	0.0652136	0.122123	0.0465638	1.0455	3.24554	3.83531	8.90711e-10
ZNF300	0.542166	0.270287	6.22898	8.25375	3.50188	6.40568	3.81112	3.07019e-22
GABARAPL1	0.463663	0.747778	1.61278	1.99333	6.69202	7.32723	3.76759	6.17789e-19
POTEA	0	0.00823961	0	0.144139	0.0663642	0.0419325	3.76035	0.00729547
LOC158572	0.0102587	0.0356349	0	0.0534324	0.29658	0.25554	3.73483	1.52479e-06
IFI44	0.469664	1.44605	10.612	46.8124	6.96824	15.1986	3.67815	9.59989e-12
ATP2B2	0.00886683	0.0462003	0.0168228	0.0615774	0.339034	0.292118	3.67743	7.39888e-08
LDB3	0.15297	0.208749	0.134748	0.294037	1.73227	2.23884	3.67018	2.75068e-16
ABCA1	1.89875	3.77871	25.7091	15.4755	23.9626	38.3831	3.65673	2.68316e-43
LOC646903	0.0533593	0.0741404	0.0202474	0.0370564	0.631981	0.677444	3.58802	8.12458e-14
SORT1	7.26362	6.3078	1.46059	12.8782	40.8297	101.944	3.55305	1.89394e-47
TMEM54	0.0597754	0.103819	1.0774	1.17618	1.07775	0.512339	3.54591	1.83256e-06
SMAD1	0	0.0180211	0.019686	0	0.0870883	0.125062	3.53348	0.00939502
LOC286367	0.0480547	0.33385	1.23084	2.71152	1.61335	2.35544	3.52902	6.8595e-10
SALL2	0.0838236	0.10919	5.28796	0.818618	1.06511	0.791426	3.52876	1.88279e-10
C5orf30	1.02759	0.223091	1.24288	3.43433	6.61238	4.6033	3.48514	1.97494e-07
CD24	3.08491	2.97663	42.666	6.37612	31.1556	23.8835	3.47878	7.82558e-37
ITK	0.027317	0	0.017276	0.0197613	0.106148	0.142677	3.44315	6.35446e-06
FAIM	0.832659	0.94805	0.579254	0.377472	6.7558	9.26294	3.39106	9.41666e-38
TPM1	0.504235	0.401392	0.667678	2.25243	3.75216	3.91666	3.3405	6.75865e-18
MAP1A	520.449	471.811	575.22	1326.7	4454.32	3775.97	3.3383	3.94599e-60
CLMN	0.898	1.29972	0.567918	2.56599	2.30303	19.1218	3.33745	1.54955e-05
AGMAT	0.384797	0.198906	0.182517	1.50317	1.83701	3.26131	3.33212	5.01819e-14
COL24A1	0.0225091	0.00390943	0.0085412	0.107469	0.121752	0.094052	3.33194	2.63804e-07
CXCL17	0.0707299	0	0	0.0460497	0.3463	0.227337	3.30492	0.00372098
KYNU	0.00557695	0.0290585	0	0.0169445	0.0962187	0.219583	3.29731	4.61197e-08
HCG22	0.0871006	0.0945487	0.0619701	0.14177	0.548296	1.03233	3.29687	4.57449e-11
FAM83H	0.0436084	0.03787	3.47496	0.0378558	0.447356	0.210246	3.25013	0.00540751
GPER	0.447977	0.7333	0.349752	0.123892	3.02797	7.01138	3.24572	1.55881e-24
MAP1B	6.31647	4.60764	5.75236	9.86984	67.8606	6.90271	3.21996	0.00264802
APOL4	0.00740421	0.0128598	0.0632152	0.0514199	0.103576	0.053546	3.18637	0.000671096
B3GNT5	0.54462	0.773924	0.211356	0.494267	3.18596	7.59873	3.18476	2.86102e-11
MCF2L2	0.166891	0.159423	0.229562	0.641075	1.15174	1.33768	3.17326	5.31231e-16
SUSD1	0.104984	0.227923	1.07891	1.16957	1.16944	1.35911	3.14938	3.84712e-11
HAP1	0.04631	0.0402161	0	0.0603016	0.296148	0.353512	3.14004	1.35737e-11
DNAH5	0.0189397	0.0123355	0	0.078096	0.141303	0.0875077	3.12957	0.00015125
ARHGAP24	2.48239	0.344917	6.7735	3.28332	9.07499	10.9164	3.0758	4.43492e-06
SGK110	0.104406	0.0477196	0.0104256	0	0.635454	0.384147	3.06485	6.65585e-07
TMEM121	0.0269614	0.0468271	0.0255766	0.0702145	0.251439	0.292471	3.04185	0.00021871
CLECL1	0.0509944	0.119567	1.06425	0.81895	0.366188	0.909666	3.03905	3.67958e-08
CCDC85C	0.451864	0.550493	0.243624	0.290665	2.3253	4.97877	3.03647	2.2868e-27
KLRC1	0.011145	0.0290354	0.0422904	0.0483742	0.114331	0.183587	3.02758	1.34512e-05
CD3G	0.0383686	0.166598	1.39222	0.749412	0.563568	0.932625	3.02408	7.28636e-08
HOGA1	0.0465488	0.101059	0.132474	0.161633	0.564342	0.486248	3.01536	0.000159607
CEP70	0.327209	0.11366	2.03314	0	1.92245	0.86765	3.01505	3.00455e-05
FLNC	0.240274	0.208656	0.284916	0.495373	1.93266	0.917078	2.97527	1.38537e-05
GRIK1	0.954854	0.552803	0.90581	1.65779	3.85878	6.6496	2.96844	0.00150862
KIAA1324	1.05351	0.577817	0.473399	1.75687	5.11929	5.14603	2.92142	8.7151e-10
SLC2A13	0.232119	0.335958	0.192672	0.453374	0.595298	3.47387	2.91647	2.80078e-05
C4orf32	1.54259	0.870741	0.786556	1.45627	6.68052	8.52952	2.8973	2.94945e-20
C14orf55	0.017657	0.00766676	0.0335002	0.0076639	0.078217	0.0815814	2.88023	0.00115352
SMPDL3B	0.0250977	0.0326927	0.0119043	0.125275	0.204801	0.156294	2.87054	3.46108e-05
CSPG4	0.0269022	0.0584054	0.0191403	0.0583836	0.250887	0.297233	2.86784	2.84792e-07
FAM129C	0.309704	0.32274	0.685526	1.18294	1.98328	1.89133	2.86578	2.88561e-09
PLXND1	2.13692	1.77191	1.51274	2.2779	13.2644	9.84836	2.86558	7.00093e-26
RTBDN	0.229376	0.0612899	0.117166	0.444186	0.855654	0.893205	2.85944	7.07377e-07
SLC35D2	0.0416329	0.0361545	0.302792	0.108423	0.148835	0.351263	2.84965	3.48625e-06
DNAJA1P5	0.0120937	0.0315069	0.0688353	0.0419936	0.0902278	0.199214	2.8485	0.000195435
DST	1.27441	2.80935	15.4994	25.6434	7.9843	18.3539	2.84377	8.06044e-10
LRP6	3.60231	4.05082	1.63814	3.24855	18.6361	28.3311	2.8298	1.06637e-109
FLJ35024	0.0232854	0.030332	0.121492	0	0.15201	0.187107	2.81937	0.00461581
DYNC2H1	1.71985	2.24031	0.815759	6.71842	12.4304	11.7467	2.81851	2.51279e-05
NAAA	0.900345	1.03483	2.3111	4.20672	5.79113	5.51107	2.81022	1.00931e-14
SCD5	0.138203	0.14402	0.0174806	0.103975	0.949462	0.662604	2.80995	3.47815e-08
PHLDB1	0.603987	0.746415	0.473798	0.897381	4.71198	2.86529	2.80248	6.55524e-09
PCNXL2	0.816931	0.157651	6.4868	8.48373	3.52713	1.79912	2.79994	0.00039844
ACSM4	0.0460892	0.0400243	0	0	0.333113	0.157396	2.78818	0.00253902
SLC25A29	0.687942	0.852561	0.591425	0.802477	3.32145	5.89639	2.77275	5.78601e-20
SGCE	0.852861	0.910362	3.64637	5.76862	3.8001	6.40571	2.73342	7.64061e-26
LOC728723	0.179627	0.253484	0.628355	0.906355	0.931823	1.59673	2.7319	1.75963e-09
REEP2	0.061117	0.0530746	0.0579779	0.0397911	0.206614	0.460404	2.72088	9.30352e-07
ANXA2	0.0400374	0.0434611	0.123438	0.204191	0.289373	0.160858	2.7176	2.28106e-05
PPFIA3	0.146784	0.175819	0.100833	0.404233	0.8591	0.90697	2.69876	8.06044e-10
LOC145783	0.2771	0.307479	0.11683	0.334092	1.45002	1.79365	2.69703	1.16008e-09
CHST2	2.05928	1.01558	0.81999	3.84009	8.68948	7.64024	2.69516	4.70892e-12
PPFIA4	0.0260307	0.214751	0.0246937	0.316357	0.48552	0.930791	2.69018	3.19155e-05
DNM1	0	0.0477597	0.117387	0.125322	0.160279	0.11048	2.6853	0.00836285
SERPINF1	0.354121	0.309888	0.870841	4.76482	1.4404	2.19322	2.66711	6.66617e-22
KLK1	0.210188	0.270143	0.606152	0.255446	1.02714	1.62138	2.66298	8.55682e-10
AMACR	0.107727	0.105245	0.60039	0.561098	0.653024	0.465275	2.65441	9.18029e-06
SYNPO	0.0462788	0.166497	0.0627168	0.0545218	0.252789	0.982792	2.63535	0.000311869
NINJ1	1.158	1.42986	0.360452	1.15053	6.23494	7.30583	2.62878	2.84183e-35
KIAA0649	0.552069	0.4623	1.20641	1.86563	2.51911	2.69334	2.61585	4.78053e-11
CTXN1	0.223888	0.131125	0.923643	0.244072	0.534128	1.37646	2.59175	4.33023e-07
ADAM22	1.46298	1.68718	2.8423	5.04951	6.4398	9.88414	2.58326	3.70879e-21
SERPINH1	0.67842	0.729069	1.11017	0.957006	2.82337	4.45649	2.57785	7.91563e-15
IFI44L	0.0630294	0.684192	4.08579	14.7913	1.39114	2.52388	2.55994	0.00380725
ANKRD20A4	0.0115061	0.0399679	0.0545754	0.0249706	0.107304	0.16642	2.55471	0.000507837
KLHDC7B	0.14179	0.104189	1.18988	1.0415	0.569616	0.648547	2.55389	1.289e-08
RGS18	0.442136	0.283536	0.0967907	1.79506	1.55417	1.98953	2.52657	4.56249e-10
CLGN	0.109319	0.0593335	0.324075	0.177934	0.363196	0.450189	2.51112	2.90877e-07
PAPPA	0.0636156	0.0828667	0.0603482	0.165672	0.237309	0.511175	2.508	0.000623601
KIF27	0.700753	0.480427	0.962154	0.848438	2.51087	3.18586	2.50754	1.07444e-08
MREG	0.60391	0.360064	0.307822	1.98744	1.86613	2.81743	2.50174	1.28534e-09
SORBS3	0.0312004	0.0474158	0.347775	0.196364	0.130937	0.263242	2.48241	0.000349112
TMEM25	0.239429	0.232873	0.308898	0.473886	0.857429	1.43138	2.47753	1.30933e-08
CARD14	0.0139131	0.0302057	0.0593932	0.181166	0.0908265	0.128567	2.4653	0.00815155
APOD	0.136168	0.0721523	5.48661	0.659146	0.54885	0.374611	2.45988	5.46668e-06
MX1	1.54033	3.99587	27.9958	129.217	11.2083	14.7816	2.45343	3.03656e-11
PFN2	5.46272	5.90932	4.6823	6.50916	21.7471	31.3815	2.44312	4.81803e-92
NAALADL1	0.378338	0.0730117	0.279149	1.93409	0.82328	1.24982	2.43865	0.00113677
SNX24	0.310883	0.21855	0.0421307	0.359831	0.676494	1.87949	2.42538	2.23646e-06
TOB2P1	0.0676454	0.0939903	0.102674	0.1057	0.340661	0.402231	2.41446	6.76429e-07
ABCA2	0.078347	0.161589	0.139355	0.603606	0.561692	0.507573	2.40595	4.16452e-06
JAG1	57.453	53.7307	33.5397	46.0377	217.692	278.931	2.39302	9.55228e-18
TCF7L2	1.494	1.03861	1.14587	2.13509	5.4731	5.52031	2.38448	6.27883e-22
IL17D	0.0697663	0.0346204	0.245822	0.077867	0.204485	0.256274	2.37053	0.000993391
HDAC9	0.816931	1.03123	0.335555	0.402105	0.997488	8.13437	2.36306	0.000885298
LGR6	2.78891	1.41278	0.199136	0.774464	5.26474	13.8255	2.34134	1.68068e-10
CXADR	4.80979	3.89177	1.35461	2.0918	17.7133	18.7582	2.32698	1.71187e-47
ICA1L	1.71725	2.0436	3.90167	4.14089	5.99076	10.3405	2.31435	3.26322e-11
FGD4	0.107846	0.479978	1.38114	0.280858	1.2572	1.20238	2.30172	0.00060695
TRPM2	1.01862	0.548438	1.50743	1.37943	2.69786	3.83057	2.28839	7.28196e-07
ZNF528	0.0230193	0.0399804	0.07279	0.0333046	0.12165	0.147975	2.27735	0.00812675
LOC100506688	0.057208	0.039744	0.0217079	0.099323	0.202736	0.193069	2.27637	9.58272e-05
DHRS2	0.14085	0.183473	2.13785	0.61135	0.722454	0.622481	2.26986	0.00643398
CHMP4C	0.127446	0.132811	0.0967203	0.508918	0.285252	0.839745	2.26349	0.000126744
RGS2	4.21403	4.81514	3.26119	5.87228	9.82491	29.2722	2.25306	6.88264e-07
STARD13	0.0719763	0.12501	0.0136559	0.231182	0.429596	0.358581	2.24455	3.39683e-05
LOC401164	0.00464855	0.0087465	0.00146993	0.00134511	0.0180633	0.0385979	2.23748	0.000138998
C9orf30	1.36043	1.34768	1.94061	2.49316	3.76858	7.42538	2.2316	1.98999e-12
NOS3	46.5022	40.383	76.901	137.742	151.2	195.163	2.22913	3.46872e-14
KDM5B	0.502633	0.653861	0.00382985	0.739481	1.72628	3.00724	2.22787	3.01049e-21
WNT3	0.892414	0.81373	1.47093	0.581019	2.86088	3.94399	2.22086	7.0089e-10
CCDC136	0.391703	0.565399	0.793383	3.89199	2.01408	1.62053	2.20689	2.11459e-07
CAST	6.80776	8.29546	11.235	19.1362	31.7039	25.0244	2.19905	1.06294e-14
HSP90B1	123.199	126.221	289.031	360.328	365.515	632.056	2.19793	1.52368e-70
IFIT5	12.6765	19.0812	47.3	205.047	48.0761	78.7721	2.19328	1.01795e-06
KIF1B	0.327056	0.411019	0.408632	0.784799	1.00182	1.94858	2.18152	1.75183e-11
APLP1	0.306556	0.683529	0.0471585	0.438734	1.83897	1.944	2.17713	1.04256e-05
NIPAL2	3.50963	1.91133	5.07869	16.5759	9.87461	10.5635	2.17522	5.10348e-06
LMO7	4.09272	3.69224	6.49271	6.36149	18.304	9.37711	2.17247	1.15879e-08
LOC100130691	0.325903	0.415092	0.329775	0.377216	1.56019	1.14643	2.15886	1.35697e-05
SV2B	0.0758368	0.0878099	0.479611	0.0987493	0.259324	0.365626	2.14039	9.7182e-06
PEG10	41.8244	40.4661	154.05	168.66	120.584	192.191	2.1346	6.0818e-93
C19orf51	24.7743	29.611	12.6354	21.9687	90.678	109.168	2.1145	6.82766e-10
C20orf112	1.63695	2.07867	2.7981	11.8574	7.23696	5.95631	2.11175	1.77891e-11
KIF26B	0.0521445	0.0622639	0.129849	0.215013	0.249226	0.162363	2.10997	0.00166686
ZAK	11.5037	11.7719	12.4093	16.2429	32.5435	54.2975	2.10236	3.20159e-46
LRRTM4	0.0766831	0.133185	0.0436467	0.199703	0.46484	0.27728	2.10127	0.00091532
OLFM3	0.23267	0.0898014	0.171671	0.11221	0.5063	0.664744	2.09761	0.00437682
KIF16B	1.55407	2.2648	2.66043	9.64507	4.46455	10.1192	2.09708	1.01487e-07
ATP6V0E2	2.83804	2.94828	3.0634	11.9211	9.8572	10.9015	2.09368	1.88795e-26
PTK7	0.25569	0.188737	0.16979	0.0443922	0.691517	0.924556	2.09078	6.88205e-06
IFIT3	0.103693	0.27915	0.619715	1.63377	0.464176	0.995692	2.09052	0.000323903
SLC26A11	0.143808	0.210332	0.437986	0.47964	0.628218	0.650758	2.09039	1.18038e-05
HSP90B3P	0.74363	0.664226	1.51165	1.49395	2.10032	2.95353	2.06685	7.59093e-08
LTK	0.00442768	0.0108943	0.0049003	0.0313894	0.0289044	0.0260906	2.06346	0.000680288
LOC645249	0.0786266	0.13656	0.171553	0.122858	0.117322	0.732882	2.06155	0.00955945
FAM86FP	0.0431782	0.0599941	0.0327683	0.202405	0.201337	0.166537	2.06064	0.00805618
SHF	1.42183	0.942297	1.63276	2.43607	2.86134	5.77261	2.05974	1.47571e-05
SCARF2	0.0620454	0.0404106	0.154504	0.168315	0.0940272	0.286671	2.05908	0.00685848
ATP2B4	1.79634	3.72704	1.4738	5.04902	9.07351	10.4005	2.05853	7.33596e-10
C17orf103	0.267359	0.464355	0.690429	1.66332	0.997345	1.67092	2.0546	2.08493e-05
CHST15	12.7196	11.3925	1.03498	5.15127	47.9451	32.8217	2.05378	1.33524e-11
CERCAM	1.73154	1.80112	0.451264	1.17277	4.66699	8.07292	2.04858	1.26832e-08
PRF1	60.0194	55.1619	2.37236	39.7278	214.798	174.826	2.04628	7.3194e-11
PDE4D	0.539366	0.3144	0.693899	4.25885	1.95691	0.777747	2.04481	0.00321099
HEATR6	0.693026	0.984814	4.22847	4.00615	2.58524	3.34123	2.0445	1.62249e-06
MYLK3	1.43567	1.68752	0.687844	1.43512	4.93632	5.89626	2.03246	2.70898e-09
SRC	46.0134	33.0739	1.75386	8.37133	116.652	157.342	2.02355	1.34657e-42
RIMS3	2.4729	2.99928	2.79147	7.85519	8.87693	9.80211	2.01955	2.26507e-12
OBSCN	0.296428	0.278181	0.326558	0.336183	0.383457	1.77491	2.01192	0.00125324
LOC401431	8.66743	4.41231	4.53642	17.9021	19.2323	25.4568	2.01161	4.15864e-05
SIM2	0.138959	0.0762146	0.111008	0.260303	0.252362	0.499525	2.00919	0.00012342
MSR1	0.0139932	0.0101265	0.461288	0.457548	0.0260998	0.0590313	2.00765	0.000530712
ALDH3B2	3.23926	2.23151	3.26345	2.54312	8.20406	10.4317	2.00719	2.50591e-17
IFIT1	0.0408518	0.263342	0.284689	0.867476	0.395632	0.679244	2.00628	0.00951591
ANXA5	0.62924	0.509821	3.22152	1.58239	2.41081	1.13373	1.98743	5.39537e-05
CD274	0.0831059	0.057736	0.0551861	0.0432858	0.170508	0.31386	1.98516	0.00130743
RXRA	1.06399	0.689072	0.222398	1.06453	3.02726	2.6808	1.98169	4.63484e-05
STX1B	0.057128	0.136429	0.0812907	0.223164	0.35962	0.298379	1.9814	0.00997656
GPR153	0.185479	0.214762	0.265883	0.268352	0.511239	0.857803	1.97325	3.71022e-06
KLRC3	0.184548	0.154921	0	0.154863	0.55648	0.548676	1.96	2.93115e-05
MLC1	0.0538488	0.0409175	0.00638537	0.0584317	0.0690509	0.265026	1.95631	0.00264965
ID2	6.86517	6.34641	6.06905	9.84716	18.4958	25.16	1.95212	1.00489e-28
MXI1	2.71773	4.0299	3.68888	4.35477	8.92094	13.625	1.94979	1.58776e-20
LOC646762	0.127827	0.0908233	0.385832	1.28114	0.270932	0.457543	1.94667	4.212e-05
SPINT2	106.887	36.8427	192.636	117.281	188.224	281.826	1.93294	2.21732e-06
TEX19	0.0971985	0.108525	0.131723	0.301345	0.336686	0.323568	1.92297	0.000183651
NPEPL1	0.198996	0.200096	0.188775	0.400042	0.595814	0.690098	1.92003	4.01172e-05
STX3	0.74728	0.595211	2.9259	4.40044	2.48134	1.56045	1.9081	1.42093e-05
HSPA4L	36.2314	27.5941	39.1763	32.9486	95.1337	105.349	1.90572	6.54681e-30
EPB41L1	14.2592	8.51317	36.7759	6.96272	34.4915	36.8797	1.90425	9.89424e-05
TMEM66	105.357	122.261	207.473	269.984	304.889	424.524	1.903	6.98566e-52
GRIN2C	0.0228912	0.019879	0.0352877	0.0471949	0.0613758	0.0758751	1.90042	0.00465988
TUBB4	2.51853	3.02667	1.84591	3.08434	7.51141	10.1434	1.89618	2.75048e-22
KLHL35	0.0345005	0.0245132	0.0416544	0.0490082	0.108224	0.0730865	1.89503	0.0063834
KLRC2	0.159069	0.118403	0.0107785	0.0789058	0.51921	0.319544	1.88524	0.00365151
CHST7	0.703291	0.445119	0.305314	0.776082	1.47851	2.15033	1.88411	1.22248e-06
TMEM169	0.224329	0.243512	0.0266008	1.64309	0.692997	0.766091	1.87236	0.000110436
RHBDL2	0.0638893	0.188639	0.47274	0.266215	0.333662	0.482572	1.86963	0.00300958
INHBE	0.749654	0.951472	1.13966	3.47074	1.65817	3.87682	1.86514	1.48257e-05
TTC28	0.174994	0.235548	10.9481	0.987414	0.571192	0.710102	1.86288	5.41982e-05
EFCAB4A	0.541058	0.490163	1.19763	2.01501	1.38917	1.79808	1.86106	5.8628e-10
DGKH	0.840524	0.952737	1.94722	0.606759	2.17007	3.46939	1.85875	2.63804e-07
FSD1L	0.370615	0.506736	0.463786	0.992559	1.1325	1.60941	1.8584	1.52197e-05
ARHGAP10	1.2853	1.78777	8.82434	8.2736	4.25626	5.21647	1.85787	2.04689e-08
ADCY9	4.63334	1.16474	0.370135	2.22276	9.71089	7.25017	1.8572	0.00526364
ESAM	0.265008	0.22093	0.301676	0.0828178	0.780974	0.672902	1.84864	0.000276487
ALOX12B	0.254297	0.303647	1.08556	1.90399	0.681821	1.07277	1.84847	0.00277385
ANO9	0.153477	0.105222	0.536401	0.567987	0.497193	0.24665	1.844	0.00731421
USP18	0.0985986	0.042812	0.280603	0.738232	0.143675	0.292152	1.83388	0.00258667
LRRC20	9.48208	6.14307	3.85503	3.70189	21.616	25.216	1.83313	1.41882e-11
MYBPHL	0.194199	0.472204	0.0245633	0.370879	0.90554	1.13394	1.82602	0.000786268
ANO6	7.67471	9.43069	10.1927	22.7407	17.6667	35.9018	1.82527	2.95276e-17
NAALADL2	0.191648	0.173086	0	0.252878	0.414651	0.702223	1.81874	7.08525e-05
LIMD1	0.0792684	0.178168	2.36649	0.97146	0.243517	0.565763	1.80673	0.00195256
GNPTAB	20.7456	24.624	27.2618	35.4829	57.7838	77.457	1.80273	5.48637e-34
ADAMTS7	0.255049	0.281893	0.109977	0.100639	0.670322	0.950184	1.80164	0.000922164
SEPHS1P	0.400784	0.269734	0.522773	0.687132	1.14933	0.732652	1.79835	0.00220881
KCNV2	0.162843	0.242425	0.231719	0.282724	0.433903	0.803797	1.79362	0.000357831
KLHL29	1.51595	3.07176	7.19045	3.50928	4.94817	9.13594	1.78774	0.00616607
CELSR2	6.60146	3.58298	2.66152	4.44124	9.50402	21.6159	1.78656	4.38763e-05
NQO1	1.85758	1.3971	1.04891	1.13262	5.17646	3.95371	1.78595	7.47489e-08
ZC4H2	3.20488	3.17799	5.31258	4.84222	5.99836	13.4376	1.77669	6.11885e-10
LEPREL4	0.23998	0.416801	0.227654	0.390606	1.00711	0.915955	1.77604	0.00407477
FCER1G	1.33987	0.74558	0.0493612	0.711425	2.62041	3.41806	1.7718	5.51356e-05
CHML	1.04676	2.56897	2.87106	4.46439	4.81734	5.66838	1.76819	0.000720319
TRPC1	0.430972	0.648717	0.57237	0.872948	1.82204	1.20051	1.7622	0.00347321
RCOR2	0.284315	0.331554	0.400714	0.275016	0.749993	1.01827	1.74163	6.71917e-05
CD99L2	1.03305	1.21617	2.74315	3.35822	2.84186	3.54614	1.74047	1.50632e-11
ARL15	1.34067	1.56998	2.00407	3.40329	4.67915	3.19104	1.73942	4.35816e-05
GAA	1.82444	1.65214	2.23977	3.2861	3.22093	7.00859	1.73189	2.55732e-07
STS	8.93692	8.0167	5.37886	9.01906	19.9216	28.2405	1.72965	1.43159e-41
DISP1	0.725312	0.198906	2.20903	0.596495	1.10363	1.47238	1.72857	0.00924648
GNAZ	3.07455	2.49709	1.238	1.94893	5.3736	10.8329	1.72464	2.89329e-09
ATP10D	0.101677	0.186405	0.128606	0.62112	0.474115	0.299571	1.72259	0.00574371
SFXN5	1.92049	1.90818	2.85588	4.4908	4.26782	6.56203	1.71267	1.36108e-10
CKB	1.1091	0.816001	1.15442	2.17965	2.08303	3.36675	1.71237	7.37753e-05
SCAPER	0.960037	1.11005	0.946543	0.772529	1.93651	4.06516	1.71161	1.25066e-07
PPM1E	8.1666	3.34885	15.6789	4.19682	12.7775	19.6301	1.71096	3.78949e-08
FLJ20021	0.648656	0.746984	0.882878	0.758946	1.0915	3.02534	1.7097	0.00117578
NIPSNAP3B	0.455961	0.742427	1.6761	2.32541	1.80721	1.51133	1.7033	0.00984911
RYK	1.78239	2.63134	2.59968	3.15257	4.62311	7.91302	1.70167	1.10266e-07
TP53INP1	111.052	139.447	357.455	698.972	269.508	437.349	1.7005	1.63685e-16
BMPR1A	266.086	182.149	113.83	219.657	472.552	777.235	1.68758	7.24377e-16
ADPRH	0.275506	0.337768	0.0307477	0.777281	0.952169	0.647861	1.68436	0.00115059
GPAT2	0.0655793	0.0406784	0.0355491	0.0813264	0.109212	0.184434	1.68258	0.00455955
KCP	7.86448	9.05318	24.4636	30.9599	25.7555	18.6643	1.68238	0.00167256
RAB43	0.399663	0.384258	0.988461	0.879746	1.07823	1.02078	1.67724	0.000607767
CNN1	0.249953	0.217062	0.094846	0.520754	0.594415	0.672837	1.67716	0.000611439
SBF2	5.10358	5.98086	7.33861	7.78808	11.6133	18.6743	1.65593	3.76529e-17
AICDA	3.60057	8.82062	36.3247	26.2879	10.7708	24.2089	1.65552	2.44191e-05
CROCC	7.52605	6.18765	0.816747	4.40705	17.0138	19.1682	1.65071	2.24999e-14
HES7	0.698913	0.36736	0.122134	1.61259	0.969122	1.95822	1.64813	0.0015358
NEDD4	13.2982	13.473	14.1112	27.824	45.7912	19.5903	1.6464	0.001127
CLOCK	4.42112	3.78058	5.56353	3.82813	8.97194	13.0592	1.64632	7.10457e-14
PODXL	85.9749	80.8751	20.4432	52.1359	133.641	333.605	1.64249	3.04578e-14
GALNT1	9.00568	9.31401	6.07225	6.07171	20.6003	28.2224	1.64004	9.1276e-46
USP46	4.65603	4.84647	5.26395	7.32236	10.2903	15.1445	1.63752	9.53958e-12
PANX1	4.961	3.40527	7.27064	7.83951	9.35011	12.8303	1.63644	2.63216e-09
PLXNA1	7.33537	5.06234	2.06224	3.96402	10.0348	24.3479	1.63558	1.53646e-08
CTTN	2.35542	2.37174	13.1325	2.57156	5.57919	6.76367	1.6245	6.87918e-12
TMCO4	1.39117	0.812929	1.71439	6.28656	3.00703	2.53868	1.61765	0.00114834
FLJ34208	0.251529	0.36405	0.538401	0.582263	0.649587	0.969105	1.60282	0.000514396
C1orf38	0.159176	0.191738	0.418903	0.575	0.507588	0.367207	1.60161	0.00374153
TSPAN13	16.013	4.54104	6.18667	14.3717	25.6438	25.972	1.59975	0.000831353
HELB	0.924827	0.747356	3.32653	2.00707	2.08434	2.14683	1.59783	0.000396452
ADAMTSL5	1.34642	1.80642	1.39925	2.93516	4.0562	3.8839	1.59678	2.37258e-06
LOC339290	0.141175	0.112089	0.0535694	0.140059	0.233223	0.43431	1.59674	0.000855122
LOC100505678	0.608113	0.469415	0.650133	0.737376	1.49432	1.17119	1.59529	0.00207436
BCAN	0.171718	0.124268	0.153848	0.774313	0.369216	0.379449	1.59479	0.00119671
C10orf128	1.31975	1.37731	0.0439285	1.02506	3.95146	2.62326	1.59319	0.000916463
PBX3	3.3138	3.73601	5.1229	4.00939	6.66879	11.8605	1.58888	5.32815e-15
PCSK4	0.857714	1.59923	1.06494	1.45629	3.07019	3.13183	1.58757	0.000906164
SLC16A8	0.27771	0.241166	1.20746	1.42637	0.582727	0.743835	1.57694	0.00950139
SESN1	2.96178	4.77665	24.0828	24.1286	6.28308	14.3186	1.57606	1.6688e-05
LINC00341	0.733691	0.397144	0.102997	0.382716	1.10459	1.80566	1.57559	3.14603e-05
FLNB	47.8029	35.8128	21.6146	60.2529	86.8881	126.921	1.57534	5.0046e-31
C1QL3	0.0997383	0.0914256	0.157693	0.168353	0.232537	0.249335	1.57205	0.00247239
FZD3	2.46233	1.69061	0.131392	2.03064	2.95655	8.14927	1.57049	3.50457e-05
GJD3	0.270604	0.184185	0.0555038	0.939629	0.463801	0.687581	1.56307	0.000999736
LZTS1	8.12725	7.76083	13.4348	11.8559	15.8942	24.5931	1.56201	1.5949e-20
PLEKHA5	14.7672	33.0134	11.8763	0.451698	46.2552	76.7318	1.56193	2.00682e-07
PDE4C	0.385325	0.701109	0.249492	0.562802	0.832781	2.03467	1.55496	0.0027729
NR3C2	2.00402	2.76215	40.2543	34.0432	4.86951	7.15036	1.54788	3.0263e-05
TBC1D4	95.313	32.5156	17.072	4.42845	139.031	175.458	1.5418	4.33937e-05
SH3YL1	0.215783	0.194595	0.393653	0.30259	0.386993	0.640207	1.53131	0.00142158
CD151	10.5971	12.65	7.67525	13.1563	22.0087	36.3044	1.52949	1.3413e-15
LOC648987	1.3928	2.00036	2.41384	3.58071	3.37217	5.05777	1.52176	0.000884629
APLP2	45.3842	34.4314	71.6339	74.4384	92.9277	98.4103	1.52155	3.10349e-21
AKAP7	0.641412	0.835513	0.594317	0.349619	1.21722	2.53504	1.52097	0.00047349
TCL1A	98.6916	53.6111	303.889	294.959	156.074	215.394	1.5161	1.0125e-11
PPP3CA	24.8995	16.8513	18.7978	18.2715	32.44	73.64	1.51477	2.47845e-11
MAP6D1	0.204	0.208704	0.281004	0.2062	0.435225	0.570357	1.51365	0.000308963
FER	1.8626	2.50287	6.91894	3.76142	4.46146	6.23875	1.5123	0.000102144
GLCCI1	5.27194	9.07056	20.3797	16.3209	11.1483	25.0306	1.49925	1.14289e-07
LTBP3	6.83155	5.90322	2.72701	3.34685	11.9746	19.1495	1.49912	5.98942e-15
RGS9BP	0.163212	0.124727	0.247727	0.385375	0.353127	0.325245	1.49597	0.00462304
NBPF1	5.63682	5.13983	4.64983	4.47838	9.56517	16.8966	1.49399	1.33524e-11
NCOA2	12.9058	12.8553	11.5146	13.5483	24.828	37.7159	1.49389	2.40657e-39
ERC1	12.6077	13.077	8.94788	15.5807	24.7598	37.5264	1.49198	2.60972e-40
LEPROTL1	4.28702	4.88011	5.19789	7.02063	8.91586	13.2895	1.49135	9.46207e-23
SGCB	1.00023	0.845028	0.884455	1.58727	2.01334	2.36025	1.49046	1.52981e-06
MMP15	3.7472	1.98133	2.68039	1.90189	6.28465	7.20581	1.48873	3.01715e-06
GNPDA1	25.4697	20.3881	26.9964	14.5063	46.7848	62.6948	1.48642	1.01916e-24
AUTS2	5.94048	11.5892	59.8659	41.6865	13.3476	30.5497	1.48566	0.000149358
ZFHX2	0.876203	0.861611	1.4546	1.23041	1.74243	2.40209	1.47771	0.000555821
BCORL1	5.55448	5.16911	5.40785	8.37465	11.6703	13.4093	1.47311	2.00376e-15
CCDC153	0.225326	0.123928	0.0356254	0.0652007	0.3082	0.525067	1.47136	0.00523064
IKZF2	0.644808	1.32313	3.62081	6.78019	2.01255	2.60735	1.4564	0.000403986
CAPRIN2	9.4003	10.3499	14.8731	23.8979	20.2885	25.8168	1.45618	1.48316e-08
DENND5A	7.88958	9.39914	12.7309	8.81056	16.4717	24.2327	1.4515	6.70688e-23
ZNF467	1.74152	2.33727	11.97	7.65515	5.19719	3.91825	1.45096	0.00197405
TRIM9	3.85124	2.4999	1.06097	4.89662	3.20163	12.8161	1.44964	0.00357258
GYLTL1B	0.688273	0.738339	0.691329	1.25354	1.53547	1.74591	1.44328	0.00157638
TTN	25.4855	27.3698	25.9107	72.5573	64.8661	52.3865	1.43984	3.50799e-11
HMGN5	35.9662	33.4446	29.2879	27.0773	83.7058	71.3553	1.43926	0.00114834
CHD7	39.218	42.206	48.1657	88.8189	77.5615	110.844	1.43107	1.34293e-36
PRKX	187.978	184.525	235.607	377.686	348.021	514.049	1.42813	2.35223e-16
WNT5A	5.65371	8.25324	11.9643	7.65056	14.0046	17.8121	1.42514	8.7151e-10
NT5DC1	3.09358	3.02898	4.48949	3.50804	6.66808	7.09525	1.42456	6.11607e-12
DLL4	0.151453	0.119567	0.0783679	0.149403	0.243967	0.381691	1.42339	0.00550627
SIX4	15.4081	12.6706	3.33594	1.91461	24.5819	40.4643	1.41875	2.1427e-16
MPZL1	34.4049	48.8591	40.1353	61.1376	68.8518	125.696	1.41382	3.25136e-14
MAP4K3	14.3792	13.4294	23.2062	25.8283	23.6571	40.6941	1.41127	6.25699e-08
C20orf203	0.851216	1.05747	0.157013	1.02629	1.96254	2.34644	1.41108	0.00123763
NINL	0.0574129	0.0530746	0.0808177	0.0418008	0.119176	0.127983	1.4062	0.00394229
KBTBD7	0.466818	0.368535	1.22788	0.920995	0.982834	0.841145	1.40478	0.00641604
TMEM38B	13.0664	12.0482	10.3647	11.3089	20.2336	37.9163	1.40173	3.29821e-17
CYTH3	0.336956	0.292616	0.383579	0.624014	0.708091	0.675087	1.40136	0.00325245
RORA	0.274463	0.39257	0.857676	1.75189	0.662488	0.856219	1.40097	0.00657139
CDC14A	0.293982	0.574418	0.632848	0.71162	0.738135	1.26744	1.39906	0.00774042
ATF5	20.7478	11.5972	23.3094	22.9469	31.9021	40.2987	1.39897	2.62447e-10
C5orf13	3.8139	2.37775	4.52633	2.47025	7.46978	5.78775	1.3967	2.11688e-05
KIFAP3	5.56891	6.01429	8.43314	7.09394	11.1741	14.7238	1.39061	7.12684e-15
PHF16	13.5091	10.9224	18.0936	19.0733	19.9838	35.0607	1.37179	2.07822e-09
ATP13A4	8.90802	12.1132	0.783215	4.11165	16.3314	31.4949	1.36979	2.87622e-05
HSF2BP	0.411111	0.329898	0.535626	0.361397	0.781354	0.817494	1.3681	0.000423196
SGSH	1.88522	2.28583	4.35289	6.22193	4.51146	4.44451	1.3625	0.00139678
MAP2K5	10.8632	10.7399	12.5475	14.5909	18.0019	30.2062	1.36088	5.01375e-16
SKI	10.2785	7.9828	14.4243	11.5325	19.6557	19.2883	1.36063	1.57054e-08
CYP2U1	0.63735	0.563924	0.521908	0.955182	0.958868	1.73208	1.35972	2.67268e-05
ATP8A1	25.0295	15.4899	5.46234	16.0262	32.9429	57.1434	1.35409	8.23478e-12
KLHL22	1.18093	0.907047	2.39677	1.67455	1.77704	2.83165	1.35384	1.81189e-05
PHLDA3	0.898814	0.596882	0.00385814	0.829675	1.35405	1.90852	1.35224	0.000105841
C9orf95	0.865567	1.12392	2.22873	4.67291	1.66825	2.7357	1.34841	0.000763966
SIPA1L1	323.623	397.709	377.868	464.717	647.398	926.522	1.34472	3.53857e-18
EML6	8.6012	6.84148	5.8164	8.92274	14.0307	19.4188	1.34226	9.34148e-19
MATL2963	0.626138	0.735977	0.773971	2.50908	1.48637	1.37724	1.33904	0.00278545
PDE8A	0.912596	1.26255	2.31655	2.4422	1.81368	2.96862	1.33833	0.000157606
PSTPIP1	3.77748	3.78304	1.73393	6.74347	5.25585	11.713	1.33787	5.28555e-05
KIF13B	1.22887	1.55041	1.12177	5.2332	2.8759	3.03686	1.33698	0.00585315
MKL2	5.23074	5.8276	17.803	10.5212	9.88714	14.0445	1.33436	1.18527e-09
ADD3	13.6705	14.8544	19.3406	23.4369	29.7097	30.2066	1.33228	1.07443e-16
KCTD21	1.14186	1.1846	2.3191	2.80739	2.53001	2.31538	1.3295	0.000839285
DUSP19	2.69837	2.48824	6.14875	4.17772	4.15089	7.15298	1.3253	0.00173651
WDR78	3.1129	2.14546	2.90614	2.10176	5.11491	5.99526	1.32518	0.00724466
CASKIN2	2.70576	1.92043	1.13531	2.50692	4.41588	5.37273	1.32376	0.00318403
LSR	3.36574	4.57947	22.5921	19.3553	9.85849	6.08268	1.32139	0.00220714
RFFL	1.96344	1.73552	1.27499	2.60738	4.41422	3.06148	1.32006	0.004483
C12orf35	7.67144	7.54964	13.8017	19.5778	15.012	16.8182	1.31464	6.67778e-19
DERA	4.89374	4.55637	4.76333	13.3575	8.5515	11.4817	1.31305	2.67525e-10
ZFHX3	5.88166	6.3112	6.963	8.50528	10.1312	15.9786	1.30767	1.53195e-27
JUP	3.71423	4.68924	3.4527	13.4668	8.30489	9.19328	1.30696	9.32634e-09
KCNMB3	1.55373	1.23047	0.713789	0.941596	2.75218	3.02305	1.30579	0.000874764
PGBD1	0.775337	0.711885	0.180048	0.175276	1.27667	1.87553	1.30252	4.75639e-05
MLK7-AS1	18.5666	16.7684	6.34067	17.4068	29.4355	45.652	1.30082	0.00478691
MLLT11	8.50494	7.50761	4.12996	7.41884	12.9808	21.1321	1.29838	6.46755e-25
C15orf41	9.69628	7.09431	10.7434	13.7415	13.3148	22.3719	1.2936	4.71987e-06
MPZ	3.98638	3.37866	0.946603	3.08428	7.36011	7.72252	1.29336	6.99155e-10
ACP5	0.512688	0.608263	0.95216	2.34439	0.929318	1.44477	1.29129	0.00387961
DGKQ	0.509192	0.45798	0.310525	0.794589	0.859284	1.14953	1.28318	0.00340675
CELSR1	0.154091	0.146869	1.67924	1.87596	0.276892	0.344273	1.27807	0.00665178
PNMA1	3.16253	3.05541	1.81534	1.94681	5.28502	7.57507	1.26958	1.86138e-09
OTUD7B	1.76952	2.11293	3.63425	2.92627	3.57277	4.32962	1.26298	0.000103467
NOL3	0.430767	0.46694	0.423133	0.689541	0.73223	1.12679	1.26171	0.000651768
SLC16A3	1.38101	3.78391	2.42241	4.34548	4.02846	6.78846	1.26114	0.00270613
GREB1	0.984334	1.18626	3.96379	3.27844	1.98583	2.43742	1.25868	0.0086758
LPIN2	3.66238	5.01572	3.73626	5.74352	7.32372	10.4592	1.25291	4.29647e-06
ZC3H12B	0.365703	0.292376	0.72688	0.574455	0.546764	0.79761	1.25198	0.00769976
IL10RB	15.0985	16.8915	22.6324	30.7915	25.4496	39.9666	1.24125	1.74138e-12
FBF1	5.8819	8.00731	7.00843	7.76999	12.3223	15.5261	1.23632	2.95429e-07
IDUA	1.89951	1.16585	1.63936	2.82675	2.81036	3.24774	1.23292	0.00865407
SAT2	0.312531	0.345967	0.811244	0.348819	0.5541	0.772709	1.23226	0.00374153
ZNF219	5.38963	4.74715	3.70929	1.83477	8.23383	12.2358	1.23197	3.46662e-09
STXBP5	12.3601	13.2212	21.8149	14.1142	16.4987	36.7859	1.22897	5.44381e-06
LPHN1	0.235633	0.253955	0.453048	0.445626	0.468928	0.491945	1.22675	0.00428999
TMEM40	0.590487	0.696258	0.781138	0.771242	0.803289	1.87615	1.22398	0.00888286
GBE1	7.24993	8.64547	12.1354	6.80093	14.3247	17.0282	1.22138	3.36546e-13
SRD5A3	4.59332	3.40761	6.48366	3.60358	6.67177	9.25686	1.22099	4.04261e-09
C9orf25	8.40331	7.172	7.10009	12.1341	12.5255	18.6561	1.21952	2.99963e-11
ALKBH3	2.18438	3.08803	4.80832	5.62008	4.50063	5.98229	1.2176	1.16106e-06
ECI2	2.89027	3.87543	3.37496	7.77251	6.9786	5.96745	1.21595	2.39226e-05
STARD9	0.17307	0.215927	0.36636	0.372647	0.297433	0.485828	1.2132	7.83895e-05
RHPN2	1.23343	1.49459	0.0598643	1.36953	2.50387	2.83041	1.21311	0.000214248
TMEM116	0.252442	0.274029	0.18816	0.213924	0.39798	0.659252	1.20933	0.00672458
FBXO16	34.125	29.365	2.35434	16.1582	52.6552	72.7894	1.2085	0.00427923
PCMTD1	2.70145	3.06997	4.11366	5.06144	4.63478	6.821	1.20552	1.21871e-08
TNFAIP2	29.3933	26.0359	7.4228	16.031	52.1393	54.5346	1.20403	4.19827e-12
C2orf88	5.43106	10.0075	5.9	16.0872	7.65189	24.9018	1.20173	0.00664103
NDFIP1	59.9839	53.9956	59.0078	63.1683	90.1536	135.339	1.20082	7.43779e-24
TLN2	67.7669	45.8511	112.501	85.2427	102.468	116.572	1.19853	7.68743e-05
GAMT	11.8734	10.5555	14.3322	12.9236	19.8391	23.3748	1.19131	5.27137e-15
COL9A2	8.27636	10.8245	13.3605	21.9197	16.1357	20.9833	1.18863	1.44036e-12
TCF12	51.1739	31.4198	10.6582	23.4627	63.8246	98.2651	1.18822	3.08576e-10
SLC9A3	16.3199	20.3576	17.3437	15.3355	28.7659	43.2616	1.18652	2.24534e-05
ITM2B	62.02	87.1586	179.087	117.953	121.898	168.485	1.18322	5.81562e-11
CCDC92	54.3308	43.8479	138.935	124.574	74.3503	118.158	1.18302	0.00133024
SLC37A3	2.05579	2.72078	3.9004	3.74845	3.44931	6.01611	1.18223	0.00021871
CAMSAP2	42.2024	62.7537	60.7372	36.9178	77.3684	129.255	1.17685	2.90087e-10
UBE2D4	8.31386	5.8512	6.07066	8.56692	10.9889	16.4293	1.17212	9.63741e-08
CCDC91	11.2597	10.5671	24.311	23.4128	14.6764	28.4866	1.17039	1.95796e-08
PLEKHB1	4.20578	5.93505	4.3858	13.9999	8.17619	11.3437	1.16569	9.26758e-05
C9orf89	6.37519	5.06736	5.94861	5.80639	10.5588	10.7633	1.16054	0.000164599
ARFGAP3	4.65637	7.13584	15.0829	10.8922	9.39047	13.0169	1.14677	3.74171e-05
TMEM14A	1.48034	1.57916	1.54301	2.68119	2.96563	2.62867	1.1451	0.00640533
RAC3	4.5385	4.44577	5.92422	4.58594	5.84093	11.6262	1.14356	0.000722488
PPP2R5B	0.461047	0.664502	0.405308	0.781598	0.760886	1.41981	1.14131	0.00215135
ZBED3	1.33628	1.56371	2.95784	2.82597	2.0991	3.44209	1.13799	8.9098e-05
STK38L	10.5045	15.7692	7.21551	18.9327	17.7262	32.856	1.13241	1.37529e-07
SPTBN2	117.73	82.7275	45.6734	58.772	153.52	223.283	1.13217	8.69598e-14
DPY19L1	6.45526	7.18215	6.25978	5.92462	10.5995	15.0158	1.13068	1.01016e-13
WDR52	2.89901	3.23172	7.2556	4.46204	4.94698	6.49275	1.12878	0.00386318
RAPGEF3	1.57964	1.52118	1.10534	1.55455	2.61084	3.09157	1.12134	0.00100912
CLCN5	3.13966	3.1187	4.0025	2.66374	5.19254	6.31579	1.11891	2.79654e-11
SMARCA2	8.19451	7.7482	14.6865	22.719	11.7761	18.0678	1.11819	4.56249e-10
LTBP1	33.4521	13.1827	11.0761	15.6413	37.9482	47.469	1.1166	0.00163297
TET2	1.5061	2.62966	2.92929	3.08178	2.90575	4.91766	1.11626	0.000284739
LOC283624	6.81738	7.06186	7.6466	5.77653	11.2901	14.2232	1.11366	6.55521e-09
NLGN2	7.31266	6.97934	6.73759	11.9456	9.15105	18.0035	1.11188	0.000300258
C14orf49	2.22389	1.00941	0.551333	0.891545	2.36354	3.6422	1.11161	0.00175567
EIF2AK4	9.37038	11.4992	7.91921	20.9389	14.7281	24.3989	1.10899	1.32309e-09
EVC	9.71462	14.3168	7.68383	12.7288	16.9779	28.0014	1.10528	7.1724e-05
STAT5A	37.4455	34.0791	21.0635	129.078	39.7144	97.8752	1.10336	4.70277e-06
MYBPC2	22.7354	19.5809	9.71678	5.59245	39.4335	34.812	1.09136	1.50699e-06
ST8SIA4	13.8022	16.5719	96.1389	46.5716	27.4449	26.1738	1.0871	1.835e-05
ANKS1A	3.80304	3.81777	4.11018	3.63013	5.1743	8.86548	1.0818	1.21601e-12
ITSN1	6.04002	6.76477	6.84974	8.44594	8.50335	15.1446	1.08009	1.06846e-06
SLA	249.916	178.665	39.4623	109.454	351.86	409.926	1.07813	3.88003e-06
TPPP	0.767275	1.10225	1.15762	0.906977	1.35498	2.04637	1.07428	0.00275702
PSAP	100.913	94.8989	60.8298	94.9229	143.203	211.196	1.07381	1.043e-33
MGST2	1.29815	0.908468	1.45251	1.56859	1.39689	2.667	1.0725	0.000201601
ST3GAL4	2.19238	1.30304	1.1071	1.22295	2.35555	4.01229	1.07179	0.00807745
SPIRE2	5.89431	6.53305	3.72771	11.3893	8.65532	13.8765	1.06552	5.20441e-06
FBXL17	2.5592	2.15365	4.55027	4.08655	3.28227	5.23848	1.06485	7.64902e-06
RNFT2	2.67708	3.27227	6.31541	12.9702	4.85192	5.64977	1.06214	0.000672006
PLEKHH3	4.75168	5.15801	3.7161	3.03227	8.24947	9.14766	1.06186	4.0994e-07
REPS1	6.54102	5.88728	7.91122	5.7346	9.30458	12.875	1.06166	5.19372e-17
CREG1	60.1789	51.4888	33.5741	46.272	78.5048	121.563	1.05466	3.50236e-17
RAB3D	5.98285	7.08689	6.7815	15.7811	11.5295	11.0252	1.0538	0.000117624
CPD	38.2055	35.8311	48.3773	59.9488	51.817	80.6875	1.05178	6.20854e-11
VASN	3.5958	3.1698	1.72101	2.16899	5.0757	6.88732	1.05061	0.000226342
FLNA	42.1603	36.3801	60.5973	54.6473	59.6702	78.7798	1.04989	3.63827e-19
MYO7B	3.26215	3.58832	4.06265	12.0244	5.53844	6.39856	1.04487	0.00315671
SFMBT2	5.42034	7.60207	6.82963	5.33318	8.21042	15.3643	1.04335	1.61143e-05
FAN1	2.74575	4.09207	1.12606	4.70464	5.53505	6.36844	1.04188	0.00304924
SCARB2	2.24355	2.40238	5.51919	7.93892	3.63495	4.46111	1.03869	0.0018094
HLCS	7.61648	5.97277	5.23552	7.93048	10.7488	12.7554	1.03581	1.66363e-07
CAND2	24.8993	46.559	46.4983	27.3475	48.1295	79.1652	1.03264	0.000869024
NAV1	6.37984	5.72049	5.60931	13.7105	10.9079	9.48183	1.03197	0.00883412
ATN1	13.1909	8.64062	9.01209	5.69886	16.3384	21.2408	1.01945	1.57261e-08
BRF1	57.7687	71.3485	35.4273	43.867	99.9126	122.097	1.0191	1.51701e-05
MEGF9	88.4049	77.1964	52.4015	44.4727	125.832	157.637	1.01385	4.86155e-17
ZFYVE16	34.4212	40.7723	36.6762	34.1117	52.4143	78.2853	1.01215	1.13932e-10
RASSF6	60.8312	58.024	159.155	122.589	101.303	95.3143	0.998712	1.7293e-08
WDPCP	6.95463	6.82543	7.20746	7.44314	9.41776	14.3152	0.998706	0.000878298
ZNF286A	24.9797	13.5774	27.916	34.0478	25.684	40.7218	0.998028	0.000593895
NRARP	1.66647	1.06572	1.3489	0.84125	2.17071	2.37976	0.992117	0.00644281
SYP	5.58806	4.4347	7.5247	9.21129	7.29981	9.66994	0.991789	0.00383142
ZNF496	1.30941	0.958455	1.19942	0.597019	1.63146	2.20206	0.988177	3.54237e-06
RCN2	41.9059	36.8515	23.1525	21.6994	51.5254	83.3721	0.984416	1.02594e-12
NINJ2	2.18889	3.02136	4.53908	6.38049	3.46669	5.46172	0.983824	0.00223292
MYO3B	71.8715	94.4579	117.813	213.228	117.874	163.076	0.978159	0.00222125
SSH1	6.42716	6.45439	7.56723	6.55299	9.70917	11.7612	0.977567	1.64191e-10
CD84	8.90684	5.20676	9.94334	11.1666	9.98552	13.7004	0.977173	2.25393e-05
MEX3A	3.95029	3.36046	3.94405	3.17925	4.9299	7.44967	0.97647	0.000967527
TMEM237	2.81691	3.6149	7.56469	5.27521	4.25624	6.70315	0.976441	0.000746388
PKN3	11.9769	8.34205	9.17114	9.00712	13.3517	21.0785	0.974339	0.00230676
PLXNA3	1.69926	1.78932	2.5231	2.23047	1.95218	4.09955	0.972198	0.00142406
CRIP1	18.135	22.6201	12.835	3.08172	24.3184	45.8702	0.971417	4.76579e-07
AIFM2	393.046	245.02	105.202	331.358	508.828	531.22	0.967599	0.000251683
FGFRL1	10.073	9.20442	6.93932	5.02408	12.7337	19.7953	0.967318	3.72057e-09
IQSEC1	25.3416	22.5437	12.1495	21.8739	33.714	46.27	0.967239	3.36254e-12
TIRAP	8.11201	6.68285	4.9609	8.43653	10.8576	13.6582	0.966593	4.05193e-08
C16orf58	392.487	404.376	380.876	489.95	577.11	743.702	0.961962	5.16017e-09
BTBD2	22.5994	21.323	19.6087	20.1883	34.3723	37.2506	0.96079	1.38905e-11
NEDD4L	19.0886	21.834	35.1787	24.5152	25.7605	43.318	0.956444	8.12745e-12
FOXP1	6.59778	9.50355	19.6325	21.1835	7.84786	20.2962	0.956444	0.00230676
HGSNAT	18.2437	20.7241	20.9871	39.7571	24.9208	40.5114	0.952952	2.40904e-07
ARHGAP12	3.1199	4.34001	4.81461	5.65676	5.18114	7.18946	0.951311	2.20798e-05
ZHX3	26.0106	24.2695	20.7802	23.7225	35.0061	48.0874	0.951294	9.13495e-12
ATP8B2	49.9804	61.7391	78.7624	56.723	88.7912	91.6903	0.950432	1.04304e-06
SUB1	43.1547	48.3945	55.1074	41.1959	64.7325	85.8556	0.94697	2.36284e-12
SRPK2	78.0834	87.3	81.2046	63.0239	108.154	166.682	0.944232	3.94369e-14
DOCK6	7.71321	6.31968	5.78931	15.1469	10.118	12.7752	0.943549	4.01482e-05
VPS36	4.79654	3.99433	7.0413	6.82452	5.8431	8.67443	0.942359	6.992e-08
PTGR2	2.03441	2.42664	2.62829	2.98235	3.52878	3.64474	0.941731	0.00782928
MCTP2	6.85285	8.3353	20.3088	19.8989	10.2366	14.7205	0.935284	1.01957e-08
ATG10	8.15437	8.55986	11.6883	6.65086	10.4878	17.1909	0.932969	0.000941125
KCTD17	4.19969	4.19563	1.90876	7.67727	6.30581	7.10641	0.924177	0.00215955
SMYD2	0.68975	0.79939	1.36946	2.10346	0.963685	1.47317	0.922495	0.00415984
MAN2B2	5.4508	5.1645	7.28154	11.0073	7.19693	9.90966	0.914427	9.58846e-06
SERPINB1	7.02922	6.31728	14.3657	15.9511	9.4987	11.759	0.910556	6.29402e-09
TBC1D19	0.630728	0.69333	0.845744	0.769309	0.863702	1.27452	0.907875	0.00786803
PARP8	25.17	28.668	45.9893	24.5153	32.8519	54.7039	0.903943	2.9267e-11
CORO1C	60.247	78.124	83.4161	50.0885	92.9465	128.794	0.903629	2.7326e-10
ZNF804A	45.5262	47.9998	61.5791	52.7174	67.3331	79.9647	0.898352	2.3558e-12
EMBP1	3.63643	3.20868	4.27048	4.47627	4.49265	6.43594	0.897155	0.00505087
FOXO3	9.75235	13.1194	20.8482	11.9354	16.7044	19.1355	0.89301	2.35435e-05
POLK	4.81787	5.37487	6.48813	8.19458	6.99295	9.12377	0.891479	8.62178e-05
SAMD9	17.7238	23.7395	41.1075	78.0372	25.5757	40.9048	0.886729	1.08004e-06
ZC3H6	2.53397	3.65	6.50077	5.84835	4.16121	5.6171	0.885451	0.000993821
CYP20A1	2.05001	1.57533	3.00451	2.775	2.48261	3.1849	0.880801	0.00108411
CD33	29.5648	24.0179	15.822	19.4844	35.1215	49.1702	0.879236	3.59598e-07
PPARD	14.0444	15.3059	19.3228	18.1261	17.8033	28.979	0.878247	8.10417e-05
WDR17	3.72997	3.52539	1.84874	2.54517	3.37606	8.55007	0.874677	0.0066658
FOXO3B	27.4148	19.8467	16.9733	28.8452	29.5864	44.8631	0.873178	0.00203707
ISG15	2.81605	4.52774	7.96349	14.5281	3.85542	8.05855	0.871628	0.00658286
APH1B	1.85752	1.85353	2.36138	1.18778	2.28884	3.57486	0.871225	2.55088e-05
GJC1	7.97537	5.93092	14.2229	1.36757	11.311	9.52286	0.869746	0.00453659
LOC642852	10.0806	9.11035	8.37673	9.26806	12.3434	17.7151	0.869125	1.98546e-06
KIAA1715	1075.13	1045.66	1063.82	1010.24	1537.81	1701.56	0.863594	4.53219e-10
ZNF518B	152.703	239.725	0	360.038	235.842	384.772	0.863223	0.00180082
DLG3	4.42153	3.5243	3.68011	5.55635	4.71745	7.7867	0.861121	8.7282e-05
SRD5A1	2.32825	2.38546	2.11664	3.84279	2.92364	4.41042	0.852613	0.000991494
CTSB	13.431	15.5304	18.9905	35.8807	24.1322	18.388	0.848741	0.00943224
PHTF1	4.0314	4.44754	3.53016	6.23783	5.67598	7.31945	0.848351	1.42868e-07
UBR3	32.0345	28.4988	22.0739	29.1586	45.4555	45.0091	0.846651	3.50842e-07
DOCK8	130.962	131.905	152.322	391.949	148.248	264.362	0.845442	6.70723e-10
C5orf22	51.6431	48.9108	65.1449	56.5835	65.9028	87.7557	0.84183	1.59569e-12
SLC38A6	2.01312	2.08381	1.59001	1.18194	2.50601	3.82379	0.841092	0.00150775
OSTF1	17.7659	18.9271	26.4407	39.2716	25.1005	30.4745	0.83865	3.37051e-07
ZNRF2	6.73628	6.33267	7.24274	9.67504	8.22955	11.8075	0.837963	3.20003e-06
MEX3D	10.5648	8.07444	9.10445	4.79887	13.977	13.6037	0.834624	0.000391841
GSS	10.1321	9.1184	10.3536	11.9703	13.1386	15.8487	0.832322	2.61114e-05
AAK1	3.76093	4.2169	4.01034	4.9592	5.2389	6.87037	0.831802	0.00336776
USP33	11.761	9.77697	7.7662	11.5222	12.259	21.03	0.829682	5.66479e-08
INPP5F	6.31243	7.03759	6.87781	9.14909	8.77163	11.4154	0.82732	0.00174179
FAM55C	6.40982	5.27607	6.53011	6.63887	7.87896	9.64581	0.825816	3.67795e-07
DHRS11	3.36394	3.00024	1.9837	3.48253	3.94267	5.72116	0.823327	0.000418385
C9orf40	0.867559	0.883976	2.09396	1.69983	1.07772	1.57954	0.819539	5.11506e-06
ULK1	4.23053	4.58878	7.43449	5.48056	5.94826	7.24162	0.819369	0.000888291
RGS13	49.5811	41.1059	0.866171	23.0867	40.6296	102.832	0.81827	0.00145006
LMBRD2	24.2526	27.4667	23.1886	21.2433	30.8061	47.9578	0.817065	3.5454e-10
FAM172A	1.68749	1.49474	2.3612	1.86528	2.0511	2.7187	0.814907	0.000522433
LUZP1	42.1201	45.5679	32.4487	40.5599	56.3506	75.3072	0.81473	1.25765e-11
B3GALNT2	13.5234	10.6461	10.8738	12.9937	14.831	21.6051	0.813457	1.29617e-05
ZBTB38	7.83869	8.52984	2.13218	8.26975	10.764	13.6257	0.809869	1.80575e-05
PIGS	24.8065	21.2829	19.7219	26.5525	29.6645	39.1026	0.809319	3.2402e-05
KIF3A	24.8172	25.47	23.8187	27.498	32.4597	42.6171	0.809021	2.29666e-07
INPP4A	19.1327	14.7663	15.4237	21.3905	25.0645	24.2047	0.808968	0.00544314
RUFY3	5.77438	10.8621	13.7502	10.1372	10.4308	14.5352	0.805624	0.0040823
BZRAP1	2.16286	2.55643	2.58968	4.70419	2.80236	4.32166	0.805088	0.000317582
THBS3	11.2517	10.9316	11.0795	16.4493	13.3845	19.8863	0.801922	0.00435465
SPIN1	54.1159	33.6994	97.1542	70.8114	59.9622	68.4992	0.800775	0.000182136
UBE2E3	33.0977	26.7406	19.5771	33.9607	34.6589	55.3397	0.799229	5.23372e-06
RPS6KC1	13.2751	13.4707	13.7811	21.3594	16.8698	22.8873	0.799026	5.56829e-06
SKP2	49.8476	42.6278	37.4128	37.2377	55.4579	82.8778	0.798101	1.9023e-11
STAT1	31.7072	40.8052	46.7469	78.9461	42.046	67.0915	0.796118	3.86056e-07
AMMECR1	38.6821	31.2223	43.9097	53.5823	43.0962	60.7642	0.796014	2.58196e-06
ARL13B	7.44511	8.39813	8.99804	7.26799	9.98244	13.4232	0.789919	0.000740881
ENHO	7.76378	5.99147	2.80933	5.66962	8.33021	12.0525	0.789754	0.00832176
PCYT1A	265.993	328.608	355.557	315.437	372.398	506.767	0.789129	9.53706e-05
CHN2	63.7834	56.9986	54.8755	36.3627	75.122	102.89	0.786862	2.21529e-11
ARHGEF12	52.0864	47.69	33.867	32.0107	67.1819	77.601	0.784647	6.44294e-09
ID3	28.8561	24.2147	29.9229	34.8988	31.0208	47.8161	0.784576	6.84532e-10
ARID3A	24.5689	21.6539	32.4959	22.9098	34.3122	31.4346	0.784337	9.53706e-05
NR6A1	245.079	248.918	363.899	279.041	264.995	478.056	0.783812	0.000815028
SRXN1	25.7146	20.3796	10.1049	39.5881	31.0242	35.6247	0.781037	0.000200104
CUL7	10.9788	11.1906	19.3546	13.4004	14.0964	18.3269	0.780468	1.95823e-05
DAP	1135.21	1130.55	1542.58	1486.27	1337.07	2015.39	0.78027	6.15578e-12
PPP1R13B	3.64069	3.26843	2.08689	2.19644	5.0798	4.7383	0.779641	0.00210412
MDH1	5.77958	5.98215	6.47949	6.74305	6.73619	10.7425	0.779514	3.42568e-11
AP3M2	6.2582	5.77654	7.43053	7.11503	7.286	10.3899	0.77691	0.000690895
NDFIP2	110.007	91.4081	104.302	77.8915	131.058	160.927	0.776782	5.01397e-09
ZNF354A	8.11857	8.04903	12.7397	13.0675	9.87422	13.8082	0.774473	0.00340681
POMT1	23.5728	22.4915	17.9887	23.5969	25.6748	42.6886	0.774016	5.24887e-05
EVI5	26.3535	30.8124	32.4918	29.708	32.3557	52.0664	0.768634	3.75246e-07
PTPN1	112.041	111.652	149.848	167.624	136.242	188.699	0.763704	2.45575e-11
PDE7A	15.0605	16.1238	21.2389	35.8379	15.6215	31.0041	0.763378	0.000325411
DYNC2LI1	3.51323	4.27864	3.98327	4.42402	4.57906	6.81603	0.763017	0.00910874
ZNF827	176.346	165.303	115.896	221.868	205.531	290.509	0.761133	3.40389e-05
LOC100505687	9.25299	9.94341	3.79578	8.59063	11.3946	16.4635	0.756533	0.00257628
C3orf26	11.422	11.8129	14.6514	20.7701	13.0928	20.8354	0.755009	0.000517664
EPS8L2	3.30387	3.13612	5.18121	9.83192	3.58686	5.82166	0.754434	0.00194947
S100Z	3.49796	3.91935	5.85622	11.1361	4.72736	5.8954	0.753803	0.00605464
DFFB	161.501	145.979	139.495	160.108	164.972	285.549	0.751865	0.00775161
SLC24A1	3.04172	2.78497	3.37276	3.28799	3.44483	4.93851	0.746653	0.00103964
VOPP1	88.8509	91.8431	115.877	259.51	110.772	147.729	0.745823	2.07224e-10
FANCC	5.01182	4.43653	5.8147	4.69627	5.57831	8.00517	0.745747	8.20844e-05
KCNQ1OT1	958.26	1045.26	459.461	565.915	1148.79	1748.99	0.74558	3.18664e-09
EIF2AK2	15.6378	15.779	14.8003	23.8596	19.5624	25.2019	0.744272	1.27429e-09
ATP9B	3.97797	3.79368	3.74964	4.66499	4.89021	6.15752	0.743817	7.44744e-05
IGF2R	27.0095	25.5929	25.4954	25.4324	31.0525	44.4598	0.743198	2.75888e-08
CEP72	228.177	240.962	267.499	264.348	275.058	398.161	0.740354	0.00020783
BCAP29	684.203	608.191	985.216	842.99	776.023	1066.2	0.73837	2.59444e-08
MXD1	21.1878	18.7061	15.0937	15.0373	23.2148	33.87	0.737054	1.72665e-05
ADK	741.179	497.891	259.968	167.299	694.332	1086.1	0.736796	0.000349956
PP7080	8.26608	7.23805	10.581	6.62522	8.04371	14.4874	0.735307	0.000692689
ITPR2	183.682	125.419	244.38	201.015	189.106	246.872	0.731117	8.10164e-06
KLHL21	12.4694	12.3142	14.4736	13.8826	14.0633	21.2204	0.724857	0.000160542
SGMS1	10.5569	17.4918	23.7821	12.7914	16.0668	23.9439	0.724844	0.00815856
PRMT2	5.79908	6.00911	4.71602	6.85805	6.7121	10.0972	0.724548	3.18868e-08
VPS26B	16.5658	16.4039	14.8626	16.335	16.5568	31.1952	0.724023	7.42013e-05
PINK1	4.19103	3.94364	5.14385	6.79093	4.96202	6.46298	0.722457	0.000936349
RICTOR	168.814	210.904	197.426	198.438	217.318	321.534	0.720462	3.39929e-07
ELOVL6	15.137	17.1756	5.58752	16.1004	21.8398	22.6538	0.719977	0.000177362
BTNL9	15.4689	17.8032	14.0429	29.191	20.1494	26.4107	0.714797	7.3674e-05
DENND5B	88.7935	108.846	262.887	164.699	115.205	163.127	0.71478	2.01221e-07
IFITM1	63.2336	72.603	85.7933	111.035	70.0326	124.049	0.709967	2.92976e-06
PRDM15	112.811	109.79	89.664	131.223	125.445	187.192	0.706436	3.5134e-10
MED10	20.035	20.3332	19.2342	22.2718	23.376	32.9887	0.704213	7.47026e-07
PAR5	28.9876	32.3259	17.8481	10.7128	35.847	49.6274	0.703219	0.000295167
N4BP2	9.41423	11.3413	21.3874	10.9602	10.7707	18.6847	0.702291	0.000100232
MAP3K10	16.5474	17.1125	25.4032	20.6179	18.1338	29.2774	0.70144	0.00332138
DROSHA	100.203	89.2171	92.1442	97.6439	108.763	154.346	0.697105	7.09232e-10
ACVR1B	13.8447	14.376	9.25178	10.0566	15.111	24.418	0.693103	7.97155e-05
RDX	9.63415	11.0226	6.43942	8.35854	14.1711	13.5551	0.693014	0.00123824
GPT2	11.5422	10.532	7.66998	15.9968	12.0955	18.6832	0.692703	3.46153e-08
TLK1	94.2056	85.5085	88.4689	112.538	116.572	126.589	0.691723	2.34641e-06
KRBA1	5.08923	4.95449	7.60586	9.16486	5.56813	8.39962	0.691256	0.00997656
WDR70	93.4075	85.3102	97.5781	86.4826	103.642	142.805	0.689973	2.84602e-06
TMEM175	14.7193	15.6106	13.4627	17.6107	18.9193	22.3539	0.687039	0.00180369
CCDC127	11.9147	10.227	13.932	11.9403	12.0339	18.7042	0.686448	0.000804261
HMOX1	9.44976	8.76225	3.19463	12.7383	11.8697	12.6554	0.685182	0.00698135
CDKN1B	407.66	538.368	1007.24	812.345	541.136	764.423	0.684992	0.000605439
FERMT3	80.1591	84.5543	103.137	153.293	95.3137	131.168	0.684882	8.0834e-10
LAMA5	4.92648	4.09807	0.91993	5.00588	5.28596	7.04632	0.681536	0.00122677
NIPBL	203.121	212.25	217.111	212.123	225.604	349.775	0.681259	8.26813e-10
BRD3	6.69945	6.77639	8.85582	6.3353	7.75347	10.7356	0.681123	7.78585e-05
KLRAQ1	7.30567	7.62863	6.19203	7.97329	8.23391	12.3841	0.680368	0.00377635
SLCO3A1	7.95318	6.52107	4.41773	4.58329	9.45748	9.83497	0.675492	0.000308399
ABI2	253.902	333.716	450.475	458.689	323.273	485.709	0.674375	0.000527845
KBTBD6	5.06901	4.39102	6.00982	4.63405	5.763	6.95645	0.669339	0.000995193
RPL37	79.2236	78.6398	94.6886	81.4595	87.5013	128.197	0.668692	1.49684e-11
CRTC1	7.46804	6.90749	9.46186	10.5938	8.69209	10.6614	0.668512	0.00171803
BTG3	20.4941	19.2245	9.46087	10.5307	23.5753	30.0157	0.667476	1.08448e-05
PSMD14	27.0457	23.7114	24.6376	22.5508	32.2292	35.3003	0.66672	1.55887e-05
ATF7IP2	4.8545	4.57523	5.20583	4.14365	5.20105	7.66456	0.666668	0.00800505
TP73-AS1	13.8086	14.298	14.6254	14.3583	16.5025	21.4368	0.664746	0.000116519
PRDM10	24.6854	22.4919	52.8623	66.1609	32.0923	29.7535	0.664705	0.00112599
ASAP1	37.2389	31.4977	31.26	29.8418	39.4831	53.4149	0.663761	2.23305e-06
SMYD3	3.35761	3.65605	3.09026	3.10724	4.0601	5.4169	0.662523	0.00208063
PIGP	13.2098	13.0487	10.3188	13.4753	13.8704	22.0587	0.661769	0.0051774
BRD9	17.1549	16.7073	16.7549	14.8758	18.6918	27.2711	0.659983	3.68722e-08
PAIP1	21.6549	18.381	21.1717	15.6703	21.4401	33.0764	0.659272	4.60631e-06
B3GNT1	12.3393	11.8348	12.6225	11.5013	14.4595	17.9111	0.65912	0.00717962
UBE2W	4.61489	3.98661	5.91556	5.16123	5.08221	6.391	0.652896	0.00634206
CCNE2	56.3629	52.4242	79.3087	48.4904	60.5531	85.2725	0.646435	2.61225e-06
ATRN	305.872	343.291	254.231	373.279	356.492	516.367	0.645856	0.00167
ANKMY2	2.29404	2.70556	1.21931	2.77489	2.37392	4.47926	0.643236	0.00972841
LMTK2	14.7018	14.3711	18.9723	16.4088	16.9104	21.6879	0.643055	2.81467e-07
ABCC4	5.6084	7.24553	6.47186	15.1304	6.41492	11.0915	0.642786	0.00398217
AP1S2	7.91058	6.7764	4.44146	3.89946	9.05608	10.1982	0.640916	0.0055437
MAST1	1.7839	2.1929	0.321253	1.7569	2.17592	3.14112	0.637192	0.00891638
2019-03-06	121.674	117.171	136.766	127.739	131.496	186.73	0.636358	6.55524e-09
DCUN1D4	36.4425	35.0008	28.6482	28.5347	38.9687	56.3258	0.63601	0.000314886
GNE	27.4848	37.13	44.8929	45.2226	31.1083	56.8346	0.635003	0.00530176
BCKDHB	19.4552	19.6464	19.1209	16.8888	22.9577	28.5227	0.63433	8.32877e-06
POMGNT1	40.4952	35.9648	34.6504	40.7787	43.3278	57.8179	0.63398	3.66415e-05
KDM4B	6.57663	7.34639	5.9208	9.09719	7.24237	11.4129	0.631072	3.15537e-06
TXN	38.3972	33.7687	25.1631	31.2303	41.1464	53.9596	0.630769	1.08925e-06
NDUFB8	52.9961	51.857	91.5875	94.035	55.8518	83.9658	0.630716	5.65022e-08
ABCA7	56.4548	62.1574	51.8615	93.8823	73.1084	81.1631	0.629653	0.000180981
C5orf51	227.794	210.638	224.622	220.061	241.089	338.938	0.627658	1.92829e-08
BTRC	7.8961	9.05752	8.78824	6.59895	9.21554	13.274	0.626832	0.00028881
PRKAA1	36.8464	36.6721	40.7877	39.2995	42.1105	54.3883	0.625589	6.66322e-07
RNF213	22.7215	29.507	40.0666	57.7588	31.0186	37.1608	0.625144	0.000215094
PXN	9.86525	10.3993	5.00147	14.6793	11.1133	15.6265	0.622762	3.39205e-06
CLCC1	35.8544	34.6608	35.477	44.1751	37.249	55.7721	0.615892	2.80632e-06
KIDINS220	66.1511	61.527	64.9246	67.8162	73.4976	92.4596	0.615263	2.2563e-06
PLBD2	8.05436	7.53636	7.35249	8.9804	8.75183	11.5915	0.614462	0.00222269
SECISBP2L	25.6328	28.9791	33.2623	35.1427	29.7327	41.9515	0.6142	1.51893e-05
ITPK1	4.41398	3.35669	3.29503	2.77889	4.15875	6.03288	0.613378	0.00709685
CTSD	78.9281	66.2863	59.7125	82.6451	80.9722	108.261	0.612618	6.28845e-06
ABCC5	13.69	14.0156	16.8871	12.1879	15.9352	20.0211	0.611827	0.00287262
SUSD3	5.40513	4.66542	4.22631	6.04084	6.07074	6.86267	0.610903	0.00717432
SCPEP1	4.02704	4.22228	4.6592	5.9043	4.76878	5.89817	0.60813	0.00388455
RASSF3	36.6517	46.4236	119.481	102.237	41.3092	68.7625	0.607411	0.000245125
CWC22	58.3865	57.7662	59.284	52.609	77.1289	68.1388	0.602619	0.0060157
ARHGEF11	215.75	223.994	184.278	270.123	268.462	291.521	0.601765	0.00882651
MBD3	253.877	229.246	276.307	263.187	295.343	317.824	0.600683	0.000138203
KLHL9	35.6552	35.4168	44.7315	51.1959	38.2609	54.0474	0.599895	0.000600521
SLC36A4	54.0045	52.7712	22.3281	21.4494	57.9202	80.4939	0.599158	0.00015827
PLOD3	16.6846	16.472	11.6307	15.2382	19.5406	22.8414	0.598885	0.00207204
NCOR1	76.7253	75.5537	81.8048	162.154	80.2268	117.811	0.597309	2.9432e-07
ZNF43	7.04864	6.41075	6.62754	6.9411	7.60202	9.67321	0.595691	0.000510687
SORL1	358.819	336.248	348.92	375.375	379.325	517.895	0.595664	5.80285e-13
PSMB7	1266.06	1158.71	1077.12	1106.3	1293.69	1843.98	0.594221	4.16778e-07
ATP2B1	28.9199	20.3581	31.7445	30.0575	22.9461	42.0422	0.593134	0.0028208
OMA1	20.7471	19.6925	24.7611	36.7488	21.5911	30.6686	0.592453	0.000320925
NSUN2	421.985	377.809	374.647	342.273	433.456	594.952	0.589721	4.7982e-08
TMEM9	241.417	251.726	142.434	199.056	264.287	371.678	0.58966	0.00582809
KIAA0947	4421.02	4077.38	3727.27	3266.48	4567.19	6374.84	0.589381	1.68559e-07
KLHL2	25.8651	25.1134	19.8323	25.8744	28.2108	37.0372	0.58728	0.00377973
PCYOX1	41.3075	42.9439	21.7915	25.9657	39.8126	70.6439	0.586899	0.0012781
PCDHGC3	19.7129	20.4261	16.6272	16.3759	10.1213	12.5658	-0.586072	6.58577e-06
RFX5	183.468	176.356	193.765	210.073	84.9025	120.372	-0.587124	3.86056e-07
ACSF3	70.4813	70.2862	60.9931	67.1519	33.2021	47.112	-0.587323	1.00279e-06
VCL	314.921	376.147	413.903	288.811	149.041	251.086	-0.587783	6.04972e-05
DDX39A	171.525	156.177	146.501	155.109	77.2957	109.225	-0.589702	1.16825e-07
TAGLN2	222.203	217.81	173.751	191.737	99.9833	151.852	-0.590909	6.11825e-08
PNKD	123.169	105.97	21.7727	45.8537	52.5913	78.1211	-0.591974	1.04938e-06
BPNT1	43.475	38.9629	31.1647	29.9845	19.4792	27.253	-0.594222	2.61806e-07
BASP1	140.728	172.825	180.426	168.899	82.1492	92.4893	-0.595121	0.00022939
GGA2	176.543	176.948	204.121	162.055	81.0542	120.271	-0.595343	2.57249e-08
TTC7A	91.2117	73.0951	33.2002	61.1314	37.0306	56.6491	-0.595441	5.04156e-05
LCP1	489.557	547.997	626.128	571.143	240.702	349.216	-0.59584	4.46664e-15
TMEM123	190.456	201.178	193.372	171.459	88.7271	134.164	-0.598963	1.92884e-07
HIST1H3I	88.2987	93.9532	98.247	57.7958	43.5211	59.2093	-0.600238	6.87349e-07
HIST1H4D	103.763	126.084	126.387	146.119	50.8368	80.4123	-0.600356	2.59089e-05
AFMID	25.7962	25.0725	20.2301	21.6949	11.8672	16.8862	-0.600908	9.44145e-07
SERPINA9	4802.33	4511.98	526.593	1047.79	2245.87	2985.22	-0.601845	2.11601e-07
CD47	71.6087	69.4684	56.1518	71.2245	28.8208	52.3907	-0.60283	6.06862e-05
PDE6D	43.7453	47.2115	46.6483	43.282	19.5381	32.4406	-0.602918	0.00375498
CD48	75.9612	97.1727	101.159	109.381	35.2278	64.6766	-0.602996	0.0010219
C12orf62	55.6127	53.6074	47.4073	61.0416	22.5809	40.008	-0.604806	0.00588338
SYS1	27.7498	25.9911	33.9238	34.0496	12.5165	17.6659	-0.608915	0.000125889
2019-09-06	262.901	301.102	319.8	350.314	126.262	191.672	-0.613725	8.77683e-07
CD27	390.382	331.761	327.182	274.015	161.424	244.527	-0.615283	1.13254e-06
MIR3687	179.707	251.561	268.314	476.67	108.227	129.812	-0.616718	0.00076702
ZNRF1	27.6005	33.7417	50.8216	40.9755	14.4638	19.7678	-0.616808	0.00781675
KIAA1274	435.632	385.914	304.467	332.217	195.018	261.859	-0.616856	3.92404e-07
SPN	116.557	109.597	91.5792	90.0317	51.8929	74.464	-0.618515	2.20008e-08
TRIM25	75.3175	64.8037	62.2367	68.0072	33.5851	44.0139	-0.619832	4.72565e-07
LOC283710	387.982	454.453	516.268	736.333	180.326	295.251	-0.619864	0.000801839
ILK	91.5761	96.9652	72.3832	100.323	43.3066	61.8064	-0.621805	2.33041e-07
SHOC2	40.9593	44.369	60.9453	48.6889	18.6067	29.3369	-0.622289	8.19752e-07
RHOBTB2	239.637	230.934	557.406	303.542	98.2801	167.647	-0.622292	2.86482e-06
MICAL3	35.9524	35.7639	56.7944	46.5595	16.1585	23.8187	-0.625371	1.37841e-08
NCOA3	437.684	507.815	476.929	529.634	206.721	322.136	-0.628308	2.76003e-07
QTRT1	28.4224	25.0887	30.5952	32.8913	12.7374	16.7357	-0.628714	0.00452123
SLC39A10	7.77314	10.0325	12.0609	12.025	4.46755	5.2727	-0.628966	0.004483
HIST1H1C	277.305	320.991	342.109	288.328	126.699	209.036	-0.630527	3.2566e-07
SMARCB1	494.818	491.721	448.156	482.875	221.015	326.551	-0.631957	3.97788e-09
GPCPD1	14.0256	15.9573	29.9179	35.4123	7.32912	9.09822	-0.632136	0.00511972
CD52	1281.46	1539.37	1275.2	2634.6	545.096	1055.6	-0.632188	0.000585602
CSRNP3	13.5543	15.6382	12.6777	12.9819	5.05868	11.6978	-0.635672	0.00785815
CTU2	11.9971	12.937	11.7261	11.5479	5.80877	7.91161	-0.63573	0.00511932
CCM2	131.854	135.981	143.877	128.314	61.9094	85.5454	-0.635969	1.22585e-08
TIPARP	75.6704	77.9545	66.9304	65.5021	28.6949	58.4466	-0.636264	0.00457597
FAM117A	235.688	239.198	224.7	226.583	108.756	152.838	-0.637019	3.1654e-08
DAPP1	19.4615	22.5826	24.4485	27.4661	9.0345	14.3617	-0.637425	1.92903e-05
CBFA2T3	114.601	95.2488	65.123	94.7086	50.7583	63.625	-0.637515	6.85504e-06
RNF8	55.0252	57.8965	33.2378	20.776	26.0154	36.0829	-0.638225	5.22116e-08
TBC1D9	55.0866	57.9911	77.1213	51.9374	20.8189	43.421	-0.638365	0.000914873
PSMD1	291.967	258.343	256.85	198.538	125.836	176.245	-0.640697	3.93377e-08
GRHPR	158.666	149.086	119.762	113.913	69.1459	100.301	-0.640855	9.28985e-09
ALOX5AP	153.694	197.936	131.473	205.538	72.9671	123.141	-0.642278	0.000127967
PIP4K2A	57.2681	64.1813	128.188	83.8201	31.2304	34.0782	-0.642356	4.14089e-05
DNAJB2	28.5233	26.7636	28.3578	36.0543	12.8112	17.4155	-0.643567	1.22746e-05
SLC12A4	14.9626	23.5618	13.3788	16.6123	8.80171	12.3621	-0.64397	0.00953117
ITPRIP	4.48885	4.91786	3.85766	6.09087	1.86487	3.39615	-0.644005	0.00450562
PLCB2	40.7674	43.2904	19.1373	35.6016	18.4972	27.8199	-0.644742	9.54726e-08
IFI16	54.8461	67.5589	101.979	102.97	24.844	43.4953	-0.64518	6.8003e-05
FAM20B	79.3802	66.0907	50.3631	59.9752	32.0048	47.951	-0.646397	3.08085e-07
DCTPP1	198.666	183.278	162.97	113.718	86.5892	122.428	-0.64651	1.21871e-08
SGPP1	525.839	597.069	674.795	347.804	247.269	370.306	-0.647428	9.91434e-07
SNHG4	18.0927	20.3972	18.762	34.2029	8.51235	12.6318	-0.647904	5.09977e-05
SEPHS2	245.967	238.214	177.528	113.186	102.908	164.509	-0.648291	3.46153e-08
CD55	28.627	30.2914	19.5246	20.8205	14.4021	17.4348	-0.648466	0.000312762
NR3C1	149.356	156.036	172.951	185.334	61.4181	108.526	-0.649526	2.37486e-06
C17orf79	68.3019	67.4439	42.5299	56.5371	29.7704	44.6831	-0.650462	8.03392e-08
INO80D	7.07345	6.88831	7.67772	7.52685	3.11275	4.51275	-0.652506	2.9432e-07
C13orf15	28.1973	26.9008	28.6925	30.1746	14.8725	14.1123	-0.65691	0.00134863
TERF2	33.2437	39.9602	33.1105	34.0369	16.6652	23.0748	-0.657504	1.09482e-06
IKBKE	9.55937	9.07133	9.58294	18.7384	4.43845	5.5911	-0.657574	0.0011974
STARD4	578.562	834.595	338.496	472.609	285.426	495.608	-0.659046	0.00529352
ECE2	15.0277	11.0927	11.6018	9.59664	6.2246	7.76545	-0.661533	0.00487475
RARA	14.7799	14.3274	15.9506	11.0642	6.26933	9.50931	-0.668303	3.78817e-07
CASP8	67.9219	76.5316	97.8361	116.622	35.4032	41.3956	-0.66877	0.00203578
LOC100294145	15.5143	13.223	17.4658	10.8466	6.6241	8.77492	-0.66888	0.000238401
XYLT1	36.4407	31.4719	78.3457	31.0265	16.5329	19.4981	-0.670136	0.000182152
PIM2	31.9961	33.3851	40.2339	41.7009	14.1818	21.1598	-0.671308	4.76866e-08
C17orf75	21.211	22.4125	22.6138	25.1991	8.68353	15.1087	-0.675166	0.00136491
ITGB2	157.549	170.985	103.036	162.112	76.227	98.8476	-0.675555	1.76853e-08
VNN2	37.2013	37.55	42.152	29.2164	15.9564	24.3945	-0.675756	3.93377e-08
NOP58	121.683	104.868	117.156	103.41	51.3006	69.7456	-0.67592	1.47696e-08
CCDC109B	21.8179	27.0226	26.522	24.2246	10.6044	15.7173	-0.676166	2.56219e-05
MRPS6	1768.96	1599.87	774.508	1032.95	721.835	1091.64	-0.677992	3.78722e-09
FAM110A	15.7875	19.4428	17.3402	19.1829	7.38336	11.6568	-0.678903	0.0018186
CHPF	17.101	14.7141	8.75908	11.5961	7.03861	9.94361	-0.681723	9.01168e-06
TRIM38	41.4478	57.7808	52.6548	50.6136	21.4443	31.6721	-0.686416	0.00107294
FXYD5	46.7241	50.486	54.0964	55.5423	22.9104	28.2336	-0.688949	1.37529e-07
MGMT	7.57365	9.22129	10.0181	7.67781	3.44733	5.57771	-0.68965	0.00307008
GORASP1	21.3746	21.6626	18.3489	23.3624	9.52893	13.2848	-0.691592	2.41574e-06
CSF2RB	12.745	13.6976	14.7089	20.5774	5.16234	9.11117	-0.691815	0.000878464
RHOQ	39.9138	54.4419	78.4248	56.668	17.5523	33.7888	-0.692977	0.00179848
NFKBIE	55.7402	57.036	33.2388	34.6751	22.8756	37.602	-0.693099	9.90383e-06
SNX8	2200.19	2425.35	2402.85	2437.63	988.273	1475.31	-0.69321	1.00062e-08
C15orf39	195.137	172.536	181.62	164.308	79.9306	114.957	-0.694232	5.3759e-09
DCK	207.498	197.827	229.438	160.66	87.7996	127.092	-0.695315	2.90087e-10
MIR3648	284.488	458.203	452.626	835.848	179.188	207.687	-0.696738	0.002211
GPR132	726.531	731.46	746.114	595.7	319.079	451.903	-0.696787	1.01949e-05
RUNX1	62.5175	56.5339	44.1439	63.5381	26.4031	36.2051	-0.700201	1.10953e-09
C16orf13	26.3813	25.2739	20.7153	20.2967	11.1856	16.059	-0.701626	5.81007e-08
RGS14	22.2253	22.2013	16.8571	27.8366	9.45275	14.0466	-0.701671	4.78363e-08
PTAFR	49.4844	42.871	75.1263	129.664	20.2556	28.2781	-0.702954	8.04659e-05
HIST2H3D	21.1932	19.3841	16.8749	36.9308	8.9139	12.379	-0.704918	1.70109e-09
TOR3A	60.739	56.3112	32.3681	43.5163	25.208	36.4081	-0.705036	1.98624e-10
DYRK3	56.7564	50.4657	34.1194	32.5215	23.9463	32.1515	-0.705258	1.38907e-05
SULT1A1	16.2322	17.9307	12.4083	12.6686	7.4071	10.5439	-0.707249	0.00108134
UGCG	67.5373	67.6401	117.909	95.924	27.3591	44.223	-0.709138	5.51512e-05
CCDC28B	29.634	39.3743	24.2338	29.3014	14.4898	21.9313	-0.709265	6.49711e-05
OGFRL1	15.7835	16.3788	10.8721	8.44443	5.89989	11.3331	-0.713147	8.89074e-06
IRF8	135.464	142.03	171.693	133.334	60.3796	84.3818	-0.715063	1.61737e-10
DERL3	52.2052	53.6689	62.7408	59.7934	23.9778	30.6636	-0.720775	7.54476e-05
BCL3	6.01949	6.47029	6.85014	12.0154	2.88925	3.53064	-0.722268	0.00251685
NEK6	102.543	121.444	136.172	106.526	49.4535	66.3289	-0.72425	1.29736e-08
LIMA1	61.4238	65.5162	84.6712	43.4463	26.7412	38.8111	-0.734277	2.82821e-10
MICAL1	66.4237	78.0374	107.968	84.2831	34.3635	38.6643	-0.736377	1.1852e-05
PTPN18	385.133	383.311	349.088	400.34	167.522	226.208	-0.736494	1.15183e-12
RAB11FIP1	43.3103	45.9105	46.7046	44.9964	18.3418	27.7776	-0.737794	1.40412e-10
TRIAP1	13.5611	12.0349	9.41519	8.01723	5.03266	8.25347	-0.739006	2.86507e-07
RBM3	62.9433	56.8821	109.692	63.4423	25.4254	35.9602	-0.74163	2.67547e-11
SGK223	22.8365	20.4782	31.3332	22.2324	9.93017	11.9638	-0.7426	2.50117e-07
ACSL3	20.3915	22.4929	13.9483	21.402	8.45523	13.7524	-0.743111	3.7643e-07
TMBIM1	118.988	102.912	31.2392	65.6562	46.84	66.6447	-0.744427	6.20523e-10
SEMA4A	87.9985	82.4455	110.922	156.757	36.4103	50.3638	-0.74836	1.08989e-10
NEDD9	6.15974	6.3264	8.72861	6.73204	2.87436	3.40988	-0.748892	0.000372809
DEF8	136.834	152.612	119.183	128.374	63.3832	83.3602	-0.749398	1.10375e-09
ZNF876P	26.0681	40.7956	26.6522	16.6087	13.807	20.48	-0.749654	0.00117643
LPXN	114.498	114.035	94.6903	125.428	47.6729	68.9947	-0.75012	6.048e-12
FAM117B	13.8558	15.9313	15.5894	15.2338	5.23238	10.3426	-0.751412	0.000200104
ARL5A	21.1627	17.7891	15.268	13.3392	6.54797	13.8821	-0.754785	7.08073e-05
KCTD5	94.0432	83.7645	87.9932	65.5105	37.7831	52.079	-0.75812	2.20008e-08
MYO1G	74.0104	105.108	137.746	125.384	36.7591	54.3632	-0.760129	1.45868e-05
IDH2	63.3424	73.2166	89.984	116.665	23.7375	47.275	-0.760328	0.000138203
WDFY1	2.38834	2.9836	2.62527	4.19793	1.03807	1.71313	-0.761299	0.00156177
AKNA	7245.96	6538.34	9291.39	8915.62	2889.76	4067.39	-0.762577	2.7903e-12
HLA-A	24.2936	24.5003	17.5893	17.158	10.4918	14.047	-0.763029	4.19825e-11
SCARNA9L	7.96636	9.87444	6.8576	7.33979	3.88661	5.07829	-0.76332	0.00230661
KIAA0922	51.5679	55.4702	61.9207	68.9926	21.6896	32.4974	-0.766758	1.38968e-11
PLD4	85.6737	102.386	91.24	69.0624	38.1254	57.0897	-0.767155	3.08447e-08
VAMP1	147.745	147.847	88.7481	108.25	62.3551	86.2226	-0.767203	9.97099e-12
H1FX	9.21555	10.824	15.3181	12.1595	3.66673	6.61809	-0.767966	0.000119842
UCP2	256.063	318.699	383.974	336.973	113.052	179.167	-0.768465	4.88906e-08
HIST1H2BN	55.4404	56.3172	60.4042	52.1693	23.3492	32.736	-0.771175	6.13135e-12
TSC2	33.8968	30.7644	38.8587	29.9967	13.5221	18.853	-0.773022	8.88689e-09
NAGK	9.66469	11.4348	10.1342	11.6629	4.43876	6.0968	-0.777405	6.44858e-05
S1PR2	338.556	335.648	315.328	351.122	145.938	188.283	-0.778546	1.89139e-14
MARCKSL1	621.352	643.619	624.097	540.115	241.853	397.623	-0.779933	2.81968e-13
GIGYF2	23.4932	23.1878	21.7932	25.3376	9.7059	13.5675	-0.780086	6.11324e-13
NCF1B	29.0245	34.2425	26.0726	33.9406	14.8005	16.1391	-0.780568	1.85469e-05
RGS10	11.8328	12.1044	8.59599	14.6118	5.16917	6.66987	-0.783381	0.00243051
ZNF200	0.506392	0.516447	0.532197	0.428956	0.203755	0.305999	-0.788491	0.000675927
PDPK1	12.0869	11.1043	12.2141	9.76969	4.77595	6.71632	-0.788994	4.2397e-11
ZC3H12D	289.969	341.476	89.6271	106.92	120.394	195.833	-0.792769	1.38121e-09
C12orf57	18.5782	19.5491	18.7921	14.6019	7.20237	11.8542	-0.794655	5.37547e-05
CCNF	91.5979	88.7473	77.1146	57.2507	37.0712	51.6132	-0.799333	8.36091e-14
KIAA1737	100.879	115.152	106.557	76.201	43.357	63.3045	-0.800219	2.60861e-10
DPYSL2	13.4292	12.8111	20.9492	17.6721	5.87875	6.83511	-0.800778	6.6112e-05
SSBP3	20.253	18.1884	32.8171	36.4552	8.44167	10.1869	-0.803796	1.66621e-07
STK36	10.1641	9.42105	8.62865	8.69726	4.13978	5.40871	-0.804621	0.000889405
DGKA	24.6477	22.4124	24.952	37.8377	8.67118	14.6402	-0.809418	3.85666e-06
STAM2	27.0861	27.7658	39.2397	29.5171	8.14969	19.7846	-0.811539	0.00129397
RMI2	32.8636	38.0491	45.007	25.1673	13.6269	21.2614	-0.812776	4.16153e-08
TMEM159	5.3363	5.30366	2.8896	2.84239	1.93481	3.33007	-0.813728	5.30648e-06
ISG20	8.85559	11.18	41.9645	51.7519	4.41849	5.22889	-0.813892	0.000820645
FLYWCH1	19.3405	16.8031	15.7583	15.1538	7.39695	10.1648	-0.814345	2.30751e-06
TRIM5	26.0437	28.8313	31.7738	42.2096	11.5803	14.9404	-0.817372	0.00211324
PASK	12.2999	12.745	13.1	13.9089	4.96494	7.16259	-0.825943	7.22851e-05
MLST8	160.525	127.802	146.839	108.812	58.2057	80.8027	-0.826047	2.39525e-08
AXIN1	36.4315	31.3405	29.679	23.9065	12.9031	20.0615	-0.826522	7.03973e-11
RQCD1	35.5115	35.6337	42.655	37.0098	13.4616	21.1077	-0.830016	4.56227e-10
HIST1H2AI	118.078	128.089	130.354	142.133	48.0754	70.8192	-0.83271	1.23086e-13
USP37	18.0075	18.5714	20.6191	17.4351	7.13748	10.5152	-0.833263	2.68715e-11
PPPDE1	184.704	155.96	117.768	133.739	71.8118	89.6569	-0.838406	1.57185e-11
PPP1R16B	1637.77	1467.62	2231.59	2959.64	606.247	884.371	-0.839214	8.36091e-14
SERTAD1	6.27232	4.97013	3.52965	3.89724	2.2651	3.09877	-0.839331	0.00195256
WDR90	16.4224	16.0513	15.0066	11.2885	6.32149	9.27087	-0.839517	1.36724e-06
PKD1	8.13221	8.02494	7.04395	6.41005	3.41915	4.20787	-0.844604	3.82621e-10
SLX4	53.1238	56.1235	43.3966	41.7252	21.4311	30.5837	-0.84942	3.84411e-13
WDR24	13.3047	12.8022	12.4379	10.1003	5.06171	7.34993	-0.852604	3.02892e-07
GRN	6738.64	7704.12	4471.04	4748.82	2921.04	3897.28	-0.854089	6.29433e-13
LUC7L	40.6369	31.2077	38.4901	23.3629	14.6166	19.1499	-0.855996	3.36341e-06
TMEM131	49.9877	70.5739	83.3886	64.6686	19.3297	39.5447	-0.856413	0.000169417
CPT1A	30.0592	21.7153	25.5752	29.0438	9.46039	15.1523	-0.862203	3.89045e-07
LONRF1	13.4358	13.4879	10.2603	13.3049	4.73264	8.13259	-0.863988	2.28504e-07
LOC100507321	4.22688	5.02119	5.4775	4.74931	1.71065	2.6659	-0.868132	0.00685511
TMSB4X	33.403	50.6282	82.6195	68.5477	18.0962	20.6821	-0.870029	1.97599e-05
NCF1C	2070.3	2379.72	1931.25	2294.09	961.494	1088.79	-0.870356	5.77546e-09
RPS2	1078.5	1106.4	1236.38	980.386	404.856	626.119	-0.871953	7.78527e-29
MFF	29.023	30.4746	29.155	26.9364	10.9601	17.0893	-0.873354	6.16236e-11
HIST2H2AB	50.8039	51.4176	48.8174	92.747	18.7293	29.434	-0.874955	5.80285e-13
CRAMP1L	33.5808	30.9897	27.1063	22.0778	12.8183	17.1946	-0.876151	4.7082e-12
RRM2B	17.7031	16.7186	18.9764	18.7796	7.02987	8.8807	-0.877064	3.02305e-14
TRAF5	1238.67	1139.23	1197.01	1541.85	479.02	621.698	-0.878441	4.71932e-11
SLC15A4	38.9259	44.3981	43.3034	31.9947	14.5182	24.9315	-0.878725	7.82627e-08
UBE2F	19.5539	18.1829	16.6835	19.0235	6.53606	11.2164	-0.885148	3.18252e-05
ZNF263	50.4917	46.9407	46.8752	29.7135	18.8723	26.2498	-0.885519	1.37668e-11
MS4A1	278.058	290.295	347.229	410.578	107.276	156.448	-0.88915	4.38006e-24
CREB1	28.2252	27.4887	31.2673	29.7037	10.4864	15.3547	-0.889413	2.31103e-14
ATG16L1	11.4014	11.288	10.3203	9.81401	4.43455	6.01115	-0.891755	4.06714e-07
ALDH2	24.986	12.8786	4.62167	4.43676	6.79602	10.8037	-0.891861	0.00304506
ITFG3	31.7497	30.2643	30.5166	21.6828	12.1457	16.3363	-0.894009	2.46249e-14
MACF1	227.902	241.449	449.096	485.219	103.733	106.688	-0.896705	5.20464e-09
STK17A	464.846	650.043	622.795	904.993	209.339	305.69	-0.897633	3.97119e-08
SMAP2	48.451	64.8716	144.324	153.643	17.7939	35.8991	-0.898667	5.77046e-06
HJURP	19.4168	19.9774	18.7032	16.8738	7.56363	10.5233	-0.898823	2.44676e-14
TTLL4	69.0177	64.688	60.8038	58.1575	25.5386	35.7924	-0.90023	4.73819e-15
ZNF434	14.3363	15.4622	13.7766	12.1134	5.54718	8.13391	-0.904848	1.19405e-06
TRAK2	10.3446	10.6727	12.2056	10.9726	4.22367	5.30165	-0.906665	7.1861e-05
MPG	66.4112	62.3166	59.6789	51.9311	23.3186	35.7532	-0.909346	1.08866e-08
RAB7L1	13.0069	14.5361	2.69135	17.5239	5.55623	6.89169	-0.910182	0.00245306
ILDR1	13.5239	20.1519	16.8448	26.4194	6.49843	8.84355	-0.910427	0.00437682
MFI2	21.0517	23.678	35.1386	33.1247	8.04187	12.4835	-0.911705	0.00237599
EIF2AK3	60.4514	101.999	134.402	102.719	23.6496	53.3273	-0.912224	0.00223196
NFKB2	23.6019	32.9607	18.1654	30.0229	10.6963	14.9695	-0.918625	2.70926e-06
STK25	454.162	442.951	467.889	519.409	171.419	232.778	-0.922965	3.38554e-09
ATIC	479.75	445.264	487.165	412.735	177.791	237.174	-0.926376	7.60292e-17
WDR12	121.13	108.675	104.498	95.5115	41.8282	62.0592	-0.927311	1.65773e-14
MILR1	8.76843	8.94933	7.99139	10.2802	3.46989	4.44072	-0.930253	2.88173e-05
D2HGDH	6.48451	6.36649	5.63229	6.28345	2.63369	3.05746	-0.930985	1.63741e-05
GFER	9.03917	7.64187	8.14265	5.5295	3.01311	4.50813	-0.93125	7.57342e-07
ATP6V0C	93.5031	94.301	83.7973	62.9879	33.5946	51.3378	-0.931338	3.53857e-18
XRCC5	201.273	173.574	205.749	174.475	68.2748	100.624	-0.931563	4.23613e-21
BTG1	24.1226	37.116	28.1475	40.6194	9.78509	18.2422	-0.939704	8.83666e-05
RHOT2	28.6406	28.542	28.6691	21.0133	10.8938	14.5316	-0.940208	3.97087e-15
ZNF142	30.299	27.9688	32.2289	26.1563	10.7763	15.2178	-0.941074	1.04909e-15
SDF2L1	85.5331	70.6882	60.8376	56.0963	27.9197	42	-0.942546	4.76211e-10
XKR6	14.3053	13.4409	15.3621	10.4019	4.73717	7.70976	-0.947521	0.00117643
CLK1	30.375	30.4872	37.3165	35.7557	11.3889	15.5643	-0.94875	2.43563e-10
SMARCAL1	727.697	710.249	685.849	553.15	266.358	370.633	-0.950049	1.37303e-09
KLF10	19.9608	22.3399	17.2544	16.6684	8.45402	9.95997	-0.957856	8.14597e-08
FAM173A	30.4814	30.5711	25.3769	22.8737	11.2738	15.614	-0.958208	1.55216e-06
AMDHD2	4.50501	3.61463	3.47431	3.53527	1.52966	2.02663	-0.959469	0.00076386
ILKAP	508.705	491.52	383.297	355.925	178.523	260.933	-0.967179	3.769e-12
ANKZF1	9.50067	11.9953	8.03295	12.6239	3.64269	5.88392	-0.967849	2.69757e-07
MYBL1	73.5354	73.8762	77.1867	64.2206	30.0712	33.188	-0.968923	2.83218e-12
EIF4E2	102.097	93.1205	85.9609	81.0761	34.8934	50.6556	-0.969772	1.46088e-14
ZFAND2B	54.2788	47.7501	66.5432	67.7799	19.2663	25.0581	-0.97012	0.000920637
UBE2J1	141.951	154.79	195.709	148.593	56.0063	72.9655	-0.970245	3.53164e-17
CITED2	26.2241	22.79	29.1026	14.7971	10.286	10.5825	-0.973016	4.05169e-05
C21orf7	130.51	136.09	134.675	217.852	51.2553	64.0424	-0.973158	2.53052e-13
PPIL3	2.42853	2.41092	2.35073	2.54484	0.907466	1.1883	-0.976315	7.89568e-08
TNF	552.517	525.925	558.496	574.897	227.543	229.752	-0.976694	2.64588e-06
RUNDC2C	27.3475	25.7914	16.3472	19.1909	11.104	11.4672	-0.976765	4.76399e-07
RGS3	40.9603	52.3477	8.87223	48.5354	19.6089	20.077	-0.977431	0.00330218
OGG1	72.8532	68.5217	69.4135	57.131	27.3738	33.3515	-0.979321	1.1872e-13
NHEJ1	30.1636	25.8991	34.3313	33.5624	10.5777	13.5095	-0.983906	9.56321e-05
TXLNB	478.072	503.21	825.822	428.414	183.16	238.205	-0.988411	2.6907e-07
ZNF598	26.9716	22.589	21.7338	15.4516	8.88704	12.4912	-0.988429	4.27931e-16
CD22	440.034	449.267	495.728	400.318	166.613	214.207	-0.98949	2.5072e-24
LAPTM5	423.122	500.981	480.242	477.396	143.686	264.058	-0.990416	1.24099e-13
CTDSP1	17.9433	15.9541	15.8263	16.6406	5.85869	8.80151	-0.992527	2.58386e-16
RAB26	166.256	194.998	199.817	167.325	67.332	87.0219	-0.995952	0.00192577
NUAK2	7.36118	7.96286	14.2546	16.0795	3.37278	2.97678	-0.996719	0.000852145
DIS3L2	8.02846	7.27447	6.20771	6.71659	2.79041	3.75324	-0.99679	4.59142e-07
THAP4	22.4308	19.4115	17.8469	17.2348	7.40847	10.5082	-1.00025	2.98032e-16
PIGQ	24.6291	23.3882	22.047	14.5883	9.12589	11.219	-1.00054	2.0944e-09
SMAD3	70.2164	73.984	99.9036	108.203	23.5104	38.9368	-1.00301	2.42849e-15
NAA60	19.6697	17.5074	19.0246	15.9874	7.27135	8.32724	-1.00601	2.55437e-09
MAPK8IP3	81.8078	86.6687	102.744	103.131	28.4265	43.9686	-1.00615	1.36068e-13
MGAT5	116.015	121.442	147.467	207.788	29.4035	76.8427	-1.00727	3.56571e-05
HN1L	83.4285	70.7612	78.5284	59.0733	27.2313	38.0113	-1.01551	2.66029e-18
PTMA	799.65	757.73	746.146	677.655	266.093	396.893	-1.01556	2.83938e-57
TYW5	8.57032	8.8455	8.23882	9.02123	3.05599	4.31792	-1.01725	0.000117401
HIP1R	28.6117	32.6302	36.0573	38.61	11.9083	13.5947	-1.01734	1.70886e-12
TMEM8A	15.4727	15.3956	15.9414	14.9055	5.46078	7.58796	-1.01761	9.99674e-12
THOC6	22.1648	17.9026	19.6013	12.409	7.16337	9.70227	-1.01923	8.68145e-09
GMPPA	480.772	462.338	767.221	777.669	154.155	247.629	-1.02112	3.66431e-05
RAB40C	35.9939	32.3593	28.9506	23.101	12.6112	15.9637	-1.02294	7.94341e-06
C3orf37	83.7568	85.0528	77.1357	89.1933	29.4274	41.7945	-1.02299	6.1757e-22
LPP	319.461	222.683	168.76	128.852	119.212	98.8926	-1.02316	1.4934e-05
TRAP1	145.496	136.386	122.218	106.175	48.7122	70.2644	-1.0237	4.24825e-21
CHTF18	35.5074	31.3983	36.7153	25.631	11.4857	16.5655	-1.03258	1.86395e-14
RAB8B	11.0032	12.9557	12.3513	12.1514	4.38681	5.56465	-1.03361	1.86395e-14
LRMP	352.919	388.915	525.432	474.016	121.76	191.03	-1.03649	4.82865e-27
C2orf69	22.92	20.1926	22.315	21.6917	8.18494	9.51517	-1.03917	1.0466e-07
ZNF174	4.60521	3.93167	3.79784	3.17686	1.40487	2.17423	-1.03939	5.23372e-06
ESPNL	18.4035	14.7152	17.5296	28.5972	5.83314	7.8893	-1.04175	5.14315e-06
NDUFA10	22.4649	20.3276	20.111	19.0854	7.67601	10.0012	-1.04284	7.6223e-18
MRPL28	123.628	117.304	118.703	78.7579	40.1064	60.4739	-1.04418	6.72032e-20
GCET2	20.1808	31.3405	41.2392	68.0736	7.62714	14.2607	-1.04744	1.13387e-05
HDLBP	214.005	184.401	192.027	167.223	68.9277	95.9307	-1.04748	3.12241e-23
NARFL	19.4134	19.4798	23.6689	23.0085	6.3171	9.91034	-1.04942	1.02477e-08
ATG4B	1274.41	1231.81	1178.47	1207	415.976	626.238	-1.04972	3.08275e-20
AAMP	34.494	29.9877	29.6093	27.3284	11.1729	15.446	-1.05018	6.43625e-19
JMJD8	10.6077	8.90013	10.3799	7.57518	3.22059	4.88347	-1.05027	9.26758e-05
RNF25	29.7524	34.1359	30.2334	26.353	10.8165	15.6815	-1.05069	4.87489e-07
PPP1R7	57.8797	62.8847	61.3874	69.8739	20.1004	30.0679	-1.05148	7.01004e-15
RNPS1	842.022	763.305	821.149	537.513	269.115	396.156	-1.05234	2.74099e-21
SUMO1	59.0437	59.0931	55.2218	52.9158	19.9242	28.9566	-1.05362	6.70118e-22
FARSB	132.221	128.748	121.924	113.499	44.768	62.7173	-1.05581	1.14711e-21
FAM134A	13.5826	13.7227	18.1027	20.4843	4.63879	6.61527	-1.05706	1.94445e-14
NPRL3	90.6311	76.438	89.871	72.0093	27.3466	41.6873	-1.05934	7.01059e-13
SGOL2	35.1603	33.775	31.7522	26.5742	12.5956	15.3452	-1.06286	1.5357e-18
DUSP28	2.20316	2.42977	2.70607	2.41833	0.707523	1.21923	-1.06306	0.00437129
MFSD6	34.2593	36.7506	13.2353	13.1652	10.0225	19.8574	-1.06383	1.96344e-08
E4F1	18.6305	18.2704	13.2286	9.12095	5.88852	9.36522	-1.0643	1.03541e-13
STK17B	44.4458	57.9098	75.3584	85.3122	22.0578	18.0115	-1.0651	8.09158e-06
C2orf67	13.4375	12.8559	10.9957	10.9658	4.93073	5.66673	-1.06557	2.65389e-08
NOL4	3.76421	4.44975	5.30506	4.15884	1.41091	1.94651	-1.06672	2.27048e-05
RPL37A	244.849	258.677	293.136	283.817	77.9776	130.135	-1.07236	3.9344e-22
SNHG9	13.7332	15.2565	13.0971	12.2704	4.66654	7.19045	-1.07617	0.00267743
RPUSD1	127.937	110.652	114.001	84.4261	37.3002	60.386	-1.07934	7.88242e-13
RAB11FIP3	76.3064	63.361	71.9028	44.7218	22.9511	33.7653	-1.08033	6.048e-12
ASB1	21.5842	21.9126	21.9246	19.1053	7.40279	10.1781	-1.08133	3.574e-14
RALB	12.5214	13.0804	6.2484	19.4464	4.41214	5.9106	-1.08237	3.54922e-05
ORC2	39.4321	37.7704	33.3607	34.4954	12.6849	18.5896	-1.08462	4.69913e-21
TCEB2	197.347	206.318	184.72	139.528	62.0917	103.013	-1.08561	1.5357e-18
NCL	2278.35	1978.39	2283.51	1764.61	719.689	991.263	-1.08819	5.02928e-57
GCH1	49.4348	68.5237	35.45	31.0578	18.3823	29.6574	-1.09056	1.0238e-08
IRAK2	8.3786	6.99896	6.61053	16.3695	2.635	3.49032	-1.09679	2.38792e-08
SOLH	92.6625	84.2593	72.9842	53.1198	29.753	40.9309	-1.09722	1.2551e-20
CD40	51.8096	69.3941	47.0732	65.8524	21.0638	27.1165	-1.09955	2.82559e-11
EAF2	49.4495	50.5187	47.1893	42.7306	15.8357	24.3898	-1.10001	2.24999e-14
ECI1	23.4845	25.0783	27.1721	22.4396	8.15174	11.1912	-1.10271	1.09313e-09
DTYMK	40.0522	33.1509	36.2959	34.8852	12.0828	17.0618	-1.10441	1.52217e-18
FASTKD2	59.623	54.6577	51.9353	50.3335	18.1666	27.5947	-1.1049	1.26241e-20
ENDOD1	0.995674	1.13577	2.77357	2.40255	0.338372	0.515294	-1.10495	0.00947249
NCF1	73.1608	91.9299	71.9072	83.3527	29.1948	35.7537	-1.10766	4.41319e-15
FAM126B	28.6226	25.1836	24.3972	23.2197	9.19168	12.0583	-1.10837	3.99208e-20
NLRC3	91.2355	76.781	63.7071	69.5329	30.3815	35.0006	-1.11387	1.47472e-15
ACBD7	4.188	3.71635	4.26218	6.12395	1.37457	1.72345	-1.11514	0.00199562
AIM1	72.4248	72.031	91.6271	43.058	24.384	32.4473	-1.11612	8.90622e-26
HCFC1R1	16.8356	16.2786	18.736	15.4145	5.37417	7.69953	-1.11903	8.85927e-07
ING5	19.4907	14.9773	18.3441	17.1797	6.23873	7.11122	-1.11947	2.56528e-09
SH3BP5	77.9774	76.3959	95.0598	58.0819	13.9332	51.4745	-1.12084	0.0025573
NUBP2	21.3891	18.2384	19.0316	12.6056	6.12652	9.53548	-1.12583	1.68105e-15
ZNF844	1.08847	1.08051	0.917633	1.03837	0.38918	0.446586	-1.1314	0.000263943
RELB	12.6161	15.506	12.1038	19.7226	5.28661	5.46031	-1.1318	4.97488e-07
BZW1	391.718	361.099	375.349	285.185	122.671	171.294	-1.13197	3.06311e-26
C19orf38	11.9596	15.2751	15.6391	18.975	4.28976	6.38693	-1.13513	0.00281108
DNASE1	74.8676	70.7895	78.8055	67.7852	24.8347	31.5145	-1.13528	4.18705e-11
NOXO1	5.86104	3.66489	4.76855	2.22105	1.51075	2.20115	-1.13628	0.000751511
ATG9A	9.98717	10.0018	6.99993	8.49133	3.21373	4.56761	-1.13899	1.07369e-16
BMF	319.211	293.117	534.281	667.653	90.0993	151.243	-1.13978	4.60603e-20
BCS1L	918.903	819.017	963.335	814.456	290.404	380.886	-1.14061	1.70694e-15
MTERFD2	729.923	685.413	760.499	694.385	229.66	319.597	-1.14067	1.84412e-13
POLR3K	22.9121	19.2286	21.0824	14.5433	6.33326	10.164	-1.14301	3.78852e-16
PIK3CG	123.857	149.639	65.4674	112.077	47.2601	57.4404	-1.14618	8.33144e-17
EVL	588.19	650.517	1133.14	906.499	188.312	294.111	-1.14922	2.83218e-12
FAM195A	7.63382	6.79379	5.69909	5.9605	2.24612	3.33291	-1.1523	1.87729e-15
SUMO1P3	39.9513	35.8603	33.8546	31.9416	11.3027	18.1014	-1.15552	1.09969e-07
ZNF487P	6.71197	7.00518	5.69545	6.4413	2.1535	3.11724	-1.15891	0.00718241
LRRFIP1	170.497	171.871	143.331	140.772	54.9985	75.8873	-1.16184	3.84438e-26
PLEK	101.884	126.415	111.017	199.911	31.6987	57.5828	-1.16274	4.11732e-14
LOC100233209	19.5658	25.4757	27.108	34.2446	8.54435	8.17658	-1.16441	2.14265e-06
PKMYT1	51.0869	46.2029	54.3135	33.0611	14.7651	22.6331	-1.1647	2.15847e-19
RASGRP3	56.6032	53.7771	62.7176	63.7508	19.2183	22.1945	-1.16754	5.16471e-20
PIKFYVE	24.3095	25.2514	23.3822	28.2083	7.92697	10.9253	-1.1692	7.42008e-26
ACPP	41.8058	32.0262	8.78334	27.1402	9.62658	19.1652	-1.17172	3.16663e-08
ZNF213	5.25245	4.92963	5.86196	5.07327	1.79233	2.00297	-1.17553	2.03545e-06
TTC9	989.971	1030.29	909.534	746.881	305.091	464.577	-1.17777	3.47654e-15
MYEOV2	21.0275	21.9707	19.9581	20.6649	6.21071	10.2454	-1.17969	1.03579e-10
GMFG	10.0195	11.3382	10.9481	14.1094	3.80192	4.11147	-1.18107	8.1445e-09
SYNGR2	79.9046	90.4748	120.644	124.896	26.6102	37.813	-1.1819	6.43728e-25
ITGAL	13.5616	15.4528	12.3443	16.7048	4.38248	6.63429	-1.18329	5.19386e-24
SYBU	4.82859	6.05413	14.1856	2.60759	1.38758	2.81974	-1.18693	0.00049128
DNPEP	20.8457	15.5667	15.0393	21.7853	6.47118	6.91541	-1.18722	9.23872e-08
LPP-AS2	0.950638	0.98327	0.9568	0.721243	0.327953	0.391252	-1.18795	0.00486745
MRPS34	3964.33	3480.37	3193.77	2506.5	1135.28	1669.69	-1.18922	2.17662e-26
UBE2I	4134.65	3706.63	4012.49	2819.64	1197.34	1736.4	-1.19788	8.91269e-28
DGKD	26.0884	32.5582	73.2769	64.2537	8.53639	13.5638	-1.19978	3.87595e-12
PCDHGA12	42.9843	24.8485	53.6089	15.3346	10.3742	14.8337	-1.2028	1.66915e-06
PRX	121.136	105.631	10.0794	33.0872	42.4165	39.0236	-1.20339	1.2451e-10
STK16	25.9257	27.615	26.0736	27.8685	7.80121	12.2715	-1.20415	2.51775e-09
RAB11FIP4	123.032	124.987	84.2976	184.5	35.6139	57.579	-1.2049	1.18557e-24
C2orf47	13.1954	11.8231	11.499	9.55842	3.88247	5.39608	-1.20557	1.33524e-11
NIF3L1	15.131	12.8161	15.7687	13.4587	4.27639	6.10377	-1.20585	3.14692e-14
C7orf72	2.88873	3.36431	2.42079	5.05189	0.706881	1.69861	-1.20818	0.00437682
FYN	1.66021	1.49621	1.82883	3.41423	0.382198	0.821593	-1.20994	7.1724e-05
RNPEPL1	8.0671	8.82108	12.3438	19.2327	2.37085	3.96459	-1.21	9.65135e-10
STUB1	42.9629	36.3721	41.8404	30.0385	11.0726	18.5876	-1.21372	2.39739e-10
TRAF7	102.954	95.81	91.9052	75.4898	30.0142	43.4853	-1.21489	3.8108e-30
COPS7B	32.9914	28.8274	29.4345	27.7013	9.53539	13.2236	-1.21577	8.34214e-24
BARD1	16.0427	17.2317	15.455	13.9304	5.19124	6.95498	-1.22594	2.81247e-20
NDUFB10	23.9624	23.3048	19.8667	15.3226	6.65894	10.8113	-1.22873	1.00776e-25
SPSB3	13.317	12.8796	13.0955	11.3353	4.12043	5.40038	-1.22931	1.41407e-09
LANCL1	55.8529	57.4315	56.8732	69.113	17.9419	23.1422	-1.23079	7.65922e-23
AGFG1	31.413	28.972	27.9674	25.7427	9.29048	12.6844	-1.23107	2.39289e-30
METTL21A	14.563	14.1493	17.4565	17.3686	4.46653	5.94113	-1.23458	1.75556e-15
ADA	26.4082	21.265	42.3638	38.6231	8.30246	8.61415	-1.23561	6.14671e-10
CAB39	21.7244	20.3364	24.1978	22.4591	6.42525	8.83002	-1.23677	4.25041e-29
COPS8	60.4102	55.5557	51.8433	46.9292	18.5843	23.1517	-1.23713	6.7062e-24
2019-09-02	8804.76	8575.24	6883.13	6385.53	2554.96	3771.22	-1.24036	3.29643e-35
FLI1	1545.7	1717.71	1568.67	2007.83	473.624	715.514	-1.24181	5.72542e-25
TIGD1	3.11338	3.4966	3.13807	3.48664	0.944571	1.45934	-1.2462	9.21345e-06
TP53INP2	3.9831	5.24748	2.97123	4.31445	1.46518	1.84104	-1.24809	2.64588e-06
TACC1	208.401	213.913	167.29	221.717	73.9161	73.8947	-1.25019	3.83989e-16
STK11IP	13.0901	11.5783	13.9444	15.4919	3.74782	5.09303	-1.25248	2.52263e-10
GALNT6	11.2662	12.3339	8.18869	8.59033	4.16617	4.0902	-1.25479	4.77271e-05
FLYWCH2	11.3339	10.5834	9.07748	6.65116	3.6975	3.98566	-1.26006	7.84646e-09
GPR114	30.5232	26.6698	25.2133	24.819	8.52568	11.8842	-1.2613	3.25602e-27
EME2	3.44932	2.74837	3.29239	2.53127	0.875499	1.33725	-1.26824	0.000182407
LTA	23.8617	33.6009	25.7013	30.6292	11.1191	8.23031	-1.27507	6.06945e-05
GPR137B	16.1203	16.9505	13.6951	24.6043	5.00153	6.5894	-1.28287	3.74731e-05
CAPN10	21.5982	19.5503	21.5141	22.6606	5.47362	9.13842	-1.28713	2.12702e-09
RPE	30.2226	28.4287	25.6223	21.5518	9.06914	11.263	-1.29109	5.61778e-27
C8orf80	21.2766	20.5441	18.0113	24.6253	5.58292	9.23637	-1.29185	3.45397e-27
IDH1	50.7348	65.7681	48.6182	71.7125	16.0311	25.08	-1.29306	2.93431e-12
HEMGN	189.614	241.505	278.745	405.568	65.4399	84.3691	-1.29441	1.62249e-06
C16orf42	24.9339	21.1711	18.8981	14.7738	6.81795	9.10624	-1.30358	3.77575e-15
CNPPD1	157.694	149.379	153.923	174.684	42.2324	64.8902	-1.30529	1.18574e-28
NDUFB3	47.1306	48.7767	44.3811	49.9988	13.6552	19.5843	-1.30789	1.22893e-29
CUL3	7352.38	7158.77	9179	7948.04	2072.79	2928.49	-1.31387	6.03459e-34
PAIP2B	12.7356	20.8592	29.9901	24.8045	3.73347	8.15265	-1.32725	1.95853e-05
MGLL	37.5527	30.056	17.8281	20.5368	10.6745	11.9579	-1.32874	4.44276e-11
SLC41A1	53.773	53.3548	20.4085	23.349	15.498	20.9132	-1.3291	5.06114e-31
EEF1B2	254.337	245.243	286.61	230.666	70.41	99.869	-1.33028	3.73858e-36
ASB2	98.651	116.73	81.1936	82.0949	26.7339	48.1662	-1.33053	1.39389e-19
MRPL44	24.9289	24.7659	23.7046	22.8972	7.06754	9.84058	-1.33099	1.21345e-22
PAQR4	17.807	16.8708	18.3617	13.6175	4.6562	7.18518	-1.33627	1.03312e-21
CD180	49.1673	73.1823	69.3331	64.1421	13.4143	29.2889	-1.34894	3.97788e-09
PGP	32.7659	32.4729	28.3455	21.7136	7.56487	14.874	-1.35238	5.35304e-13
ARPC2	8159.61	8272.18	7366.1	7253.22	2222.73	3309.66	-1.35416	5.13028e-42
LOC729020	2.27125	2.35804	2.22681	1.86149	0.698159	0.836049	-1.35428	0.00019821
NDUFS1	65.2035	63.3915	62.3241	59.3176	17.5127	25.5959	-1.35776	9.56715e-38
SCARNA6	3.40613	4.26433	3.23503	3.48482	1.16851	1.36196	-1.35852	1.85195e-07
C17orf87	1.88221	2.12829	17.2416	29.0191	0.639963	0.67744	-1.36357	0.00478691
PARVG	8.68029	10.8994	23.8308	38.4913	2.85921	3.58755	-1.36958	2.61531e-05
MMP25	0.630639	0.665681	0.474472	0.495535	0.126752	0.314529	-1.37041	0.00708938
ICOSLG	1998.87	1888.5	1563.58	2238.41	618.631	633.853	-1.37351	6.63904e-19
C16orf79	0.564411	0.544247	0.46241	0.365878	0.160644	0.203203	-1.37393	0.0022983
GRK5	2.1228	3.12029	2.89686	3.52695	0.819467	0.880839	-1.37749	0.00149478
CRIP3	7.46108	6.69382	3.80455	3.93187	1.72033	2.99101	-1.38403	7.65828e-08
LOC100499405	1.62781	1.18833	1.36579	1.26107	0.411272	0.500273	-1.38685	0.00192859
TBL3	28.9971	24.6424	23.9347	15.8538	7.63579	9.79015	-1.38714	1.02783e-27
RASGRF1	0.868015	0.800679	0.673717	0.414612	0.274998	0.256967	-1.38738	0.00280334
IRF2	6.45283	7.54866	12.922	12.518	2.1315	2.36759	-1.39125	7.86224e-07
SNRNP25	45.2016	39.4158	42.4045	32.189	11.2259	16.437	-1.39301	3.00417e-32
IRS1	2.79013	4.373	9.06915	5.48422	0.773582	1.6293	-1.39597	0.000667383
C10orf54	2.47536	2.17729	0.215829	1.14947	0.814764	0.62889	-1.40089	0.000271962
DDX26B	2.23093	2.13391	7.72926	12.3496	0.783973	0.597546	-1.40091	0.0099076
KREMEN2	88.6056	92.7347	51.3482	63.3257	23.0048	36.228	-1.40322	1.48935e-20
NMI	0.500423	0.590573	4.5281	3.46415	0.119664	0.237141	-1.40723	0.00442948
PAQR8	0.811727	1.0167	3.22822	3.17092	0.262041	0.326127	-1.40821	0.00578491
C17orf72	5.77274	4.89917	3.93294	5.45542	1.77414	1.53918	-1.41346	0.00031154
SNORA78	0.306604	0.337261	0.374882	0.272074	0.0698955	0.136871	-1.4204	0.00848236
PPFIBP1	1.17946	1.04582	1.71954	3.79372	0.382088	0.309262	-1.42392	0.00645715
ICAM2	20.2559	22.359	17.31	20.4824	5.99677	7.42026	-1.43145	3.75227e-14
APOBEC3G	56.2774	49.3974	56.8312	179.393	16.0837	16.7755	-1.43406	0.00187177
GLIPR2	0.609505	0.499055	0.715866	1.51676	0.178646	0.163253	-1.44127	0.00404778
MDH1B	1.32874	1.41031	1.22048	1.09854	0.354049	0.508426	-1.44162	0.00317532
SH2D5	0.457287	0.535238	0.754434	0.68462	0.148334	0.15976	-1.45061	0.0031782
PCGF5	5.49934	5.54567	11.8986	7.85272	1.72812	1.63308	-1.45217	1.41534e-05
SCARNA5	4.99845	5.86669	4.31172	6.21486	1.54032	1.81613	-1.45444	2.07737e-08
TMTC2	0.850155	1.55294	0.785632	1.57781	0.28023	0.477014	-1.46344	0.00602556
MT2A	5.34782	2.09499	1.19718	2.14263	1.0989	1.14292	-1.46723	0.00328257
SYNGR3	1.27721	1.47041	0.595422	1.90068	0.421996	0.410516	-1.46746	0.00152317
SPSB1	7.31984	5.68957	3.72055	6.11891	1.53384	2.52698	-1.46989	2.84626e-07
HIST1H4L	30.7491	29.0382	48.4658	13.8254	9.27483	8.52651	-1.47477	9.21686e-16
PER2	66.0146	57.4337	63.7281	49.3293	16.168	21.4957	-1.4821	9.2939e-35
A4GALT	20.706	21.4177	15.5207	19.9099	5.6826	7.07835	-1.48683	2.20058e-29
NOTCH2NL	0.740281	0.980372	0.399409	1.72706	0.185539	0.345753	-1.4969	0.0012709
PROX1	3.14353	4.75201	7.12384	8.16973	0.814341	1.63719	-1.49798	0.00211851
IL16	14.0922	17.6231	14.3709	30.9429	4.21945	5.30334	-1.50191	3.33806e-17
NTHL1	5.16074	4.74755	4.54851	3.6112	1.09003	1.9534	-1.5034	2.81754e-12
MAG	2.651	3.29735	8.946	2.94853	0.759715	1.0318	-1.50589	0.00045609
SP140L	5.41016	6.86841	13.7748	15.7108	1.521	2.1842	-1.50898	1.03765e-07
METTL7A	25.6465	32.8522	22.0663	20.3771	6.80852	10.9918	-1.51075	4.51175e-25
TUBA4A	65.1793	63.2837	51.9621	55.0263	16.0874	22.405	-1.51407	9.78225e-45
LTB	72.6949	83.86	43.3005	63.9689	24.608	20.3591	-1.51633	1.13932e-10
PIK3C2B	42.0426	50.7968	93.7244	107.962	14.69	11.8231	-1.52239	9.04041e-09
SEMA7A	29.5297	27.4184	25.6437	12.4867	8.35764	8.10258	-1.52573	2.96009e-13
RAPH1	1.73309	2.08763	1.19328	1.14049	0.586548	0.510997	-1.53157	0.000520779
HLA-E	35.0905	40.5918	57.7242	43.2298	9.35254	13.0622	-1.53259	7.12069e-29
ARPP21	8.98021	7.8858	18.1314	6.59135	2.5187	2.31018	-1.53404	1.18628e-09
HAGHL	12.2571	13.3093	12.3003	13.179	2.98501	4.59924	-1.53993	4.84462e-18
CFLAR	85.0498	93.8766	129.29	156.543	22.441	30.0595	-1.54132	2.21938e-19
CCDC147	1.34153	1.07806	1.61452	1.26885	0.317442	0.386138	-1.54526	0.00189389
C16orf91	7.18523	7.44619	6.18467	4.18967	1.81524	2.43619	-1.55519	2.05441e-11
RHBDF1	0.764225	0.537794	0.374986	0.571908	0.122881	0.254104	-1.56305	0.00444827
GNG2	148.868	140.009	69.0525	52.8555	42.7078	37.7414	-1.56447	1.46685e-17
CCDC78	10.2103	10.5524	9.79068	9.6032	2.29589	3.75347	-1.57023	1.97769e-08
PDLIM5	18.9159	13.5359	7.36599	9.43815	4.61858	4.45383	-1.57061	7.27767e-11
KCNH4	16.3991	8.54917	0.884745	5.59986	3.28583	3.72627	-1.57965	0.000105327
TRAF3IP1	50.8921	47.409	75.4799	48.1215	12.4295	15.4716	-1.58009	2.20222e-31
BTN2A2	3.80748	3.90504	2.875	1.74759	1.1632	0.967069	-1.58088	0.000127931
FAS	14.3851	11.668	0.958184	3.82526	3.4056	3.93326	-1.58168	6.14034e-18
FSD2	6.01488	8.16405	11.7933	3.27514	0.922885	3.39192	-1.58713	0.00121245
PLCL2	87.5601	113.96	98.9145	152.986	29.5048	26.138	-1.58854	2.57033e-05
KCNK12	33.2997	16.3177	9.00802	6.60946	6.57809	7.20308	-1.59103	3.74399e-07
RASL11A	1.15291	1.34495	0.830829	1.43895	0.313789	0.38567	-1.6016	7.74553e-05
NLRC5	2.07018	1.79777	3.66176	9.46283	0.472602	0.606473	-1.60809	0.000218162
EBI3	0.21076	0.448415	0.253251	0.301881	0.0851729	0.0987898	-1.60864	0.00686819
TELO2	209.189	175.414	181.773	127.347	43.8409	63.5994	-1.61854	2.73896e-33
ZYX	8.30445	11.4894	35.9858	8.66368	2.44501	3.02427	-1.62105	1.64154e-12
INPP5D	80.0703	83.137	95.7954	93.6059	19.2605	25.8452	-1.62673	3.78318e-51
DNMT3L	0.318694	0.349748	0.315614	0.507705	0.0751192	0.10975	-1.63089	0.000384493
MAP3K8	11.2483	12.6569	11.2576	20.1333	2.82091	3.76704	-1.63177	3.53164e-17
EDA2R	0.9825	1.01122	0.448758	1.89532	0.356327	0.175439	-1.63354	0.00689948
HDAC4	12.592	11.3313	12.5545	9.53706	2.58507	4.03368	-1.6392	1.52955e-09
CLIP2	2.91544	4.08026	2.88916	6.10116	0.837521	1.07721	-1.63984	8.81707e-05
CASZ1	4.2055	5.1843	3.77168	4.74176	1.07066	1.50514	-1.64381	4.10284e-06
CD1C	20.9865	6.67318	3.41129	11.256	4.1885	2.91349	-1.64776	0.00152457
SP110	6.77242	10.4985	14.3541	19.7679	2.02388	2.66382	-1.65372	2.54893e-13
MTTP	5.91073	4.6739	7.24826	3.87956	1.34446	1.46732	-1.66779	0.000371832
PLEKHG1	34.0785	54.9724	161.803	108.107	10.7961	12.68	-1.68231	5.5951e-15
SP100	36.2746	44.1331	74.4041	61.0363	9.00993	12.3649	-1.68699	5.84311e-28
VPREB1	1.10854	1.25085	1.65443	1.96752	0.263392	0.357436	-1.69949	8.30485e-05
IL4I1	0.375724	0.661887	0.422619	0.372755	0.155175	0.107824	-1.70903	0.00415574
ELK3	5.26072	6.46476	2.47296	3.47992	1.49376	1.47834	-1.71984	8.89275e-15
PDGFD	37.5419	29.6071	1.4409	7.7153	11.9065	3.28217	-1.74778	0.00514484
CD74	1285.23	1362.98	1156.45	1072.44	269.01	411.305	-1.74794	5.4221e-204
MYO1E	95.3313	34.1634	1.419	4.7703	21.7912	7.61025	-1.75359	0.00721844
USHBP1	0.0518787	0.051488	0.057249	0.101099	0.00493689	0.0212686	-1.77649	0.00218583
LOC100130357	0.438064	0.678586	0.168472	0.308333	0.143539	0.13319	-1.77778	0.00196884
TJP2	0.463113	0.369998	1.01045	0.643235	0.0863788	0.119081	-1.78291	0.000805604
FNDC1	14.4389	12.0599	2.2404	5.10698	2.51902	4.09088	-1.79211	1.26185e-12
VAV3	0.381611	0.405038	0.656982	2.28209	0.0790859	0.11357	-1.7932	0.00751233
LOXL2	354.481	524.613	582.666	694.617	103.912	108.007	-1.79881	3.49783e-13
LOC100505746	32.6374	50.3869	21.0943	41.3046	9.62546	10.3749	-1.80485	9.62455e-10
HIVEP2	39.9672	36.6336	21.4247	24.0119	5.91978	13.4524	-1.81158	5.59077e-19
DBNDD1	5.96781	7.23192	6.03978	7.57557	1.92378	1.07094	-1.81805	2.03213e-05
TMEM154	30.5919	39.0187	39.809	56.1734	7.25773	9.5874	-1.81905	1.58177e-18
PSMB8	17.508	15.4853	22.2897	22.0574	4.09674	3.48423	-1.83923	2.71858e-19
DEGS2	1.66155	0.681374	1.00702	1.24204	0.236736	0.315237	-1.83958	0.00454087
CXorf21	1.18909	1.30677	2.94981	4.26596	0.314035	0.262123	-1.84581	3.57531e-05
LPIN1	65.1617	77.9601	82.8417	122.373	12.8867	21.5396	-1.8523	8.91231e-36
UBE2L6	17.8884	13.7552	39.4712	93.6168	3.30711	4.05259	-1.86511	2.05149e-07
C16orf59	1.21938	1.13156	1.43199	0.95869	0.235238	0.314005	-1.86849	4.97817e-14
ST3GAL1	1.58642	2.62493	8.88719	6.78374	0.462718	0.50885	-1.87229	1.693e-05
PLEKHA2	527.079	559.851	849.726	614.332	109.4	136.013	-1.90936	1.1138e-63
ZNF608	10.7491	23.051	74.498	46.3922	3.13707	4.55236	-1.92112	1.42101e-08
PTPN6	101.157	117.832	131.516	104.7	23.8171	24.4246	-1.92309	6.38071e-34
ZPBP2	1.62402	2.62119	0.887015	1.12498	0.474251	0.46135	-1.9347	0.000129619
LGALS9	2.04707	2.54926	1.15302	10.7671	0.437496	0.588278	-1.93725	4.16778e-07
TSPAN33	37.7986	37.4805	32.0797	52.2875	5.79284	11.3836	-1.94401	2.1486e-33
CXCR4	2.82079	4.16308	16.6151	15.3484	0.579541	0.998689	-1.94573	1.1872e-13
BIRC3	2211.27	2621.31	1742.97	2290.46	554.431	467.76	-1.95797	3.1897e-21
P2RY10	0.221486	0.334506	0.182704	0.117033	0.0359227	0.0851172	-1.97117	0.00437682
LOC388692	39.3734	44.8337	31.0624	34.0051	10.1165	7.50595	-1.97187	1.28227e-06
HIST1H2BI	2.84202	1.23544	0.145481	7.55147	0.477748	0.369687	-1.97204	2.89153e-05
GNG7	2.7386	5.68532	22.2884	20.4721	0.742104	1.10859	-1.97417	1.47585e-07
PTK2B	59.1073	64.7612	135.033	117.702	13.9573	11.8885	-1.98024	2.73273e-22
PTGS1	1.55525	2.00383	1.53805	6.05335	0.350753	0.4084	-1.99007	1.69437e-07
HAVCR2	1.82645	2.92134	26.0426	2.96879	0.486664	0.516661	-1.99689	1.03774e-05
ALOX15	17.2782	12.4702	4.37298	3.91529	2.96909	3.22443	-2.01312	2.2541e-08
CCDC122	0.979745	0.987448	1.32968	1.71963	0.226758	0.17814	-2.01616	2.24534e-05
LYN	14.5357	14.5251	11.2965	26.1621	3.07761	2.77138	-2.04052	1.63545e-23
EIF4E1B	0.352978	0.142815	0.106543	0.233294	0.0299258	0.0709078	-2.07696	0.00109315
NLRP7	4.62244	2.7243	0.0182203	2.95671	0.794103	0.630198	-2.07731	1.56742e-09
FAM49A	9.71537	11.0255	19.9326	23.4759	1.57831	2.68146	-2.0804	5.11854e-38
ERBB3	0.172538	0.188921	0.142327	0.130242	0.0419758	0.0301393	-2.08069	0.00657798
BCL2A1	2.56447	5.00682	5.37447	12.4097	0.678466	0.840334	-2.08586	1.33301e-06
FCER2	0.310014	0.25461	6.15995	0.655064	0.053789	0.057932	-2.09388	3.89103e-06
SETBP1	5.9165	6.82055	9.03707	13.646	1.16161	1.36229	-2.09611	2.17735e-11
PHACTR1	2.6639	4.72219	3.38548	2.61349	0.520526	0.992127	-2.09627	3.81095e-07
ARHGEF6	27.115	25.5875	17.8757	23.4199	3.68051	7.11163	-2.09893	5.17199e-44
FAM113B	19.3986	27.776	31.0514	41.378	4.97792	4.00536	-2.11231	3.43634e-11
RNF43	0.377045	0.346247	0.238453	0.210681	0.0808341	0.059201	-2.11354	1.83659e-05
SGK1	9.56726	7.39239	1.58073	5.57473	2.02542	1.0531	-2.12752	9.23872e-08
HES1	36.1302	40.5911	20.1333	46.7172	4.71254	10.5571	-2.13153	3.03242e-06
FMNL3	49.008	50.3548	33.1235	34.0946	10.4264	7.90882	-2.14272	1.00405e-20
ITGAX	0.0806606	0.173715	0.0153035	0.226866	0.0300893	0.0181479	-2.15251	0.00198732
MAP7	0.41096	0.275309	0.289605	0.244628	0.0930768	0.0283048	-2.15475	0.00255625
SESTD1	0.291852	0.356827	0.102002	0.77006	0.0716259	0.0493714	-2.16688	2.08724e-05
IMPA2	0.170399	0.102445	0.0870405	0.389714	0.024448	0.0263311	-2.17665	0.000271546
MS4A7	0.609203	0.997366	2.2927	1.70789	0.111764	0.192597	-2.18376	2.33413e-05
RASGEF1B	0.624109	0.889822	5.93821	8.53102	0.104246	0.17964	-2.19605	7.7652e-06
SELL	0.474566	0.313994	0.0857506	1.19666	0.105375	0.0363173	-2.20898	0.00195808
FAM134B	15.7214	10.1333	0.820265	1.02356	1.0426	4.04949	-2.22008	6.79572e-08
FCRL5	0.402165	0.352736	1.18268	1.67225	0.082512	0.0517047	-2.22477	1.3723e-05
HIST1H2BL	41.2094	41.4665	50.6133	55.8761	6.75286	8.20543	-2.2284	2.1269e-63
CLEC17A	16.6691	17.5714	23.1619	20.1295	3.74094	1.9941	-2.2454	2.90087e-10
DLG2	11.7601	11.2838	9.32179	11.6739	1.66337	2.51479	-2.24662	8.98502e-46
IFIH1	3.26673	3.74362	2.91499	7.13482	0.765107	0.419511	-2.26061	1.49984e-05
DOCK9	0.866959	1.11717	2.69722	2.25779	0.156487	0.194758	-2.26708	9.25516e-07
KIAA0226L	1.63839	5.34368	52.4359	24.3555	0.260526	1.06473	-2.28869	0.000233216
C12orf77	3.49469	5.74985	9.64614	7.5353	0.560707	1.07493	-2.30735	3.04549e-10
LOC100507463	1.85422	1.49713	2.50022	2.99852	0.283385	0.274068	-2.33143	2.22787e-08
AHR	4.38187	3.68954	4.53605	3.05532	0.445932	0.922767	-2.37033	7.63384e-18
IL4R	86.7668	107.667	58.7589	62.4862	10.0835	23.3703	-2.37178	1.38253e-30
SNCB	0.623253	0.934074	0.228868	0.924999	0.149997	0.0969304	-2.40302	1.13912e-05
CCBP2	0.361474	0.613863	0.373388	2.3081	0.0599301	0.0968192	-2.41283	8.95366e-06
CHI3L2	1.19668	2.96322	3.71701	2.65344	0.325236	0.329682	-2.41752	6.48508e-06
C2CD2	0.199636	0.209864	0.463488	0.770734	0.0391954	0.0253287	-2.42689	4.34217e-05
BTN3A1	1.98066	2.01211	2.68723	1.95296	0.327607	0.276267	-2.46103	7.84646e-09
C18orf1	3.88292	6.75235	18.5093	12.0623	0.586973	1.0893	-2.4703	1.23903e-10
UBASH3B	1.87812	1.04944	0.277471	3.22733	0.229707	0.21029	-2.47074	9.25615e-07
BTN3A2	5.20033	5.66103	4.50463	2.66538	0.911482	0.703852	-2.47094	6.12392e-12
TMC3	0.505318	0.585097	0.292944	0.26807	0.0261808	0.135347	-2.48959	0.00638902
TSPAN18	80.4691	78.2634	4.36611	14.3516	7.73224	17.3032	-2.48975	1.6198e-39
SOCS1	1.20361	1.53202	1.02741	0.824484	0.132172	0.292353	-2.50465	1.44282e-13
LACC1	2.88961	2.427	2.84316	2.43158	0.371496	0.411542	-2.51783	3.33057e-12
HLA-F	0.94475	0.458476	0.237236	0.313577	0.0259136	0.178622	-2.51832	0.00353304
PTP4A3	0.756636	0.959939	2.7309	1.28286	0.132306	0.118747	-2.52419	6.64164e-08
TAP2	143.321	110.839	129.748	135.893	21.7955	13.4671	-2.52891	4.28426e-17
CD83	12.6835	18.5313	9.08174	14.7206	1.90106	2.72916	-2.53453	2.4888e-44
BATF	0.107192	0.126936	0.268081	0.689428	0.0181756	0.0156605	-2.54074	0.00113368
ERO1LB	7.88658	15.8168	11.7587	7.20792	1.62364	1.78158	-2.55506	1.48672e-11
NAV2	0.189708	0.202498	0.00749851	0.456309	0.0368583	0.0190547	-2.56982	4.0168e-06
ARMC9	12.8253	19.5797	25.8459	23.9843	1.90863	2.76826	-2.5751	1.44868e-27
LYSMD2	3.29211	5.19426	1.11812	2.28744	0.612774	0.566079	-2.5875	4.71064e-12
HLA-DQB1	166.913	213.775	252.213	140.008	29.4846	21.971	-2.59052	2.60569e-25
SEMA4D	67.2587	52.4879	29.176	60.0644	9.78616	6.11594	-2.59606	3.77322e-17
CIITA	57.31	66.1487	61.1806	45.8921	9.03631	7.817	-2.59673	3.05075e-36
AIM2	7.06225	27.5153	72.2824	62.4497	0.427212	5.04596	-2.61723	0.00488114
CACNB4	0.197645	0.18067	0.878257	0.451506	0	0.050152	-2.63563	0.00832659
HLA-DRB1	238.616	257.177	239.931	107.285	33.9957	30.5942	-2.66394	8.42497e-48
PARP14	20.6916	20.558	18.5965	76.5201	2.55807	2.94677	-2.66473	6.03459e-34
CDKN1A	21.1367	32.8778	85.2328	42.2419	2.60619	4.82969	-2.66618	4.82634e-20
HLA-DRB6	1.83987	1.97231	1.97843	0.791473	0.259668	0.236895	-2.68292	1.68242e-11
PVRL1	85.0213	72.2568	0	41.762	12.6977	6.80747	-2.70899	9.50263e-08
SH2D2A	3.57407	4.21224	12.23	14.7374	0.476163	0.512839	-2.72903	5.24887e-05
TNFRSF14	7.19254	7.40276	8.92901	11.0229	0.807407	1.05244	-2.7414	7.48033e-13
HLA-DQA1	310.349	359.602	349.776	200.049	48.1742	31.7792	-2.75417	8.14835e-24
COL4A4	0.716937	1.08135	0.751704	15.1332	0.14076	0.0758007	-2.81602	2.77617e-06
SLAMF7	0.285277	1.6666	1.74676	0.202619	0.0483721	0.197972	-2.82143	0.00183949
TAP1	15.1119	11.7911	7.80801	11.4858	1.56132	1.57639	-2.84367	3.22969e-35
CD1D	2.6045	2.4966	3.57783	1.12429	0.172547	0.434573	-2.86854	4.13895e-10
HLA-DMA	67.8047	73.0435	65.3648	33.0679	7.40772	8.74249	-2.88383	2.50051e-107
HLA-DRB5	25.0595	26.7766	24.4701	11.2138	2.88318	3.01497	-2.88417	1.24192e-64
PLEKHO1	1.50582	0.967406	5.32398	3.69478	0.168374	0.101861	-2.89693	4.90557e-09
IFFO2	1.68995	1.84852	0.723124	3.00896	0.234728	0.15024	-2.92127	9.5963e-10
RAB37	1.11332	1.34066	2.74596	3.7112	0.15228	0.119279	-2.935	5.73914e-09
MICA	0.293313	0.240565	0.270519	0.102556	0.0379917	0.0196407	-2.96546	3.37186e-08
DUSP6	1.41154	3.84594	2.3768	0.919006	0.197459	0.382802	-2.97644	1.36724e-06
HLA-DQA2	2.53926	3.03026	3.12371	1.66389	0.336115	0.250112	-2.98994	4.58853e-10
CMAHP	0.516733	0.726525	1.89074	2.11468	0.0917905	0.0395442	-2.99342	0.000251979
MYEOV	3.68752	4.27408	2.45155	4.04509	0.502687	0.299545	-3.00894	9.64581e-15
HLA-DPA1	122.783	122.926	120.026	63.782	12.1954	12.0525	-3.07579	1.16734e-85
HLA-B	127.438	131.376	121.922	129.743	14.0143	10.9971	-3.08163	1.17583e-44
EXT1	93.465	94.4072	23.8268	17.9053	7.57129	11.1105	-3.11016	6.62932e-97
CD53	24.0305	68.9699	101.241	51.5066	3.77632	5.37793	-3.12893	2.01144e-16
DIRAS1	1.24203	1.78843	0.674715	10.2996	0.1749	0.108047	-3.13182	1.08731e-11
SP140	1.25593	2.23803	8.84276	8.07189	0.125365	0.21912	-3.13722	9.38458e-14
PPAP2B	0.613702	0.498079	0.435275	1.419	0.0213956	0.0829568	-3.18589	4.36018e-10
MYO10	1.44732	0.935666	0.274596	0.0558399	0.0899836	0.129219	-3.19433	1.57329e-09
HLA-DRA	677.019	769.791	902.201	357.411	70.9877	56.5158	-3.21264	1.09665e-50
PREX1	26.2338	20.6834	16.7001	13.4841	2.57531	1.6642	-3.22438	1.28534e-09
BTN3A3	3.78844	5.00934	4.82139	3.31576	0.21809	0.588787	-3.25685	1.00209e-12
B3GNT7	38.261	33.6278	43.9653	49.1927	2.25359	4.23107	-3.2697	3.43487e-58
SIGLEC14	0.150612	0.210722	0.61913	2.38245	0.0312132	0	-3.27445	0.00100912
KCNH8	0.566657	0.799647	1.27669	2.19309	0	0.113833	-3.28851	2.39226e-05
LOC115110	0.110054	0.0907934	0.0657728	0.11751	0.00410541	0.0132649	-3.2937	7.6058e-11
ASAP3	12.7885	15.0516	18.8997	16.5809	0.843672	1.61906	-3.29595	7.18074e-24
TTC39C	2.76892	4.65564	25.9597	17.2092	0.219768	0.426051	-3.30224	2.77815e-10
HAMP	3.95289	4.11928	8.74967	2.97392	0	0.635259	-3.31047	0.00362062
SAMSN1	3.69589	5.01412	4.39303	0.60555	0.100435	0.73163	-3.31129	3.40231e-09
TMOD2	3.14239	5.09624	2.76442	3.60218	0.375712	0.31293	-3.32277	2.08293e-12
ANXA4	5.06816	3.38557	0.100864	1.15374	0.13221	0.612292	-3.33592	7.80943e-10
GAPT	59.3749	58.5829	96.8314	180.728	2.82753	7.30876	-3.33718	1.72513e-13
CUX2	0.197866	0.0429572	0.0312839	0	0.0102516	0.00883294	-3.3413	0.00430929
AP1S3	0.386251	0.311803	1.37792	2.35654	0.0304406	0.0262282	-3.37696	3.25722e-10
TLR4	1.80737	1.75788	3.04045	3.84916	0.134843	0.154911	-3.37798	2.1714e-11
LOC285758	0.189468	0.195664	1.81679	2.08482	0.00955112	0.0205736	-3.40067	1.45997e-07
TNFAIP3	7.2107	11.0914	4.21253	3.54277	0.709931	0.747622	-3.40769	2.24932e-16
HECW2	2.30554	3.79466	3.01159	5.9134	0.262668	0.213387	-3.41249	9.781e-19
APOL3	0.709232	2.50924	0.199349	2.73633	0.146983	0.105536	-3.42086	7.11179e-06
BLVRA	0.202824	0.20549	0.0641355	0.264103	0.0157626	0.0135814	-3.43919	0.00875513
HLA-DOB	1.09879	1.41952	3.23858	1.92142	0.075905	0.121719	-3.45557	2.97323e-23
IL5RA	0.0308523	0.0365351	0.0532139	0.216694	0	0.00450745	-3.49061	0.00910874
CLCN4	14.9594	71.0352	287.444	234.854	1.78097	4.85932	-3.50792	1.14241e-05
IL2RA	3.03007	5.18529	11.7937	67.2289	0.249336	0.358055	-3.52174	1.75991e-10
ELFN2	1.51595	9.87352	3.59523	2.1933	0	0.812084	-3.53098	0.00411235
CTSH	1202.93	1020.03	292.309	450.32	64.0439	96.2087	-3.57452	4.50241e-115
KCNA6	18.2351	21.4518	9.27198	8.10476	1.72326	0.937764	-3.61067	7.01004e-15
LOC731424	0.240918	0.313823	0.0623301	0.4563	0	0.0351976	-3.64021	2.07806e-05
KLF7	0.293801	0.545716	0.232259	0.425075	0.030444	0.0262311	-3.6434	1.46179e-08
SLC2A3	2.49164	4.87734	2.312	0.868729	0.241256	0.257104	-3.6443	4.33092e-17
HLA-DMB	53.6594	60.9482	75.1185	40.2162	3.78609	3.88406	-3.65148	1.95145e-91
MMP9	0.18208	0.300428	0.0777274	0.10274	0.0169806	0.0146308	-3.65299	1.61143e-05
RGNEF	0.726972	0.276739	0	0.0518691	0.0650105	0	-3.65744	1.21675e-05
WNT10A	2.78256	4.51681	1.90866	5.05397	0.13973	0.343983	-3.7012	1.823e-12
GFRA2	0.276926	0.34355	0	0.412106	0.036894	0	-3.76671	0.00181469
SIRPB1	0.115399	0.100214	0.0684201	0.112699	0	0.011591	-3.79026	0.00150862
TSPAN11	0.163386	0.496601	0.0774971	0.0709166	0.0380931	0	-3.80014	0.00474015
TFDP2	0.584915	1.21907	0.147966	1.35402	0.109097	0	-3.80417	9.93473e-07
C11orf41	1.76393	2.18167	10.433	27.6436	0.0249246	0.214755	-3.83632	6.28831e-12
GCA	0.887662	0.462513	0.0641577	2.17226	0.0630723	0.0135861	-3.87279	4.21196e-09
EPHA4	0.169036	0.0277715	0.00433389	0.00793177	0	0.011013	-3.88238	0.000115779
LY9	1.87912	3.14877	7.98404	20.5857	0.197459	0.0850671	-3.90745	6.16236e-11
C3AR1	1.07614	1.91357	1.33686	1.86837	0.0238953	0.14412	-3.93233	5.86161e-11
RIMS2	3.42768	0.89299	0.623229	9.24891	0.053277	0.183618	-3.93334	4.50675e-07
NLRP11	11.7287	19.5987	18.5402	1.24263	0.366038	1.38213	-4.02129	2.59075e-22
MYO1D	2.23705	6.8667	1.63889	6.08543	0.227216	0.213571	-4.11719	4.10014e-12
MARCKS	0.850812	2.33218	17.778	9.12792	0.0666262	0.0887191	-4.13097	1.16273e-14
WWC3	2.26866	4.23855	18.3614	15.2004	0.119196	0.192566	-4.16491	9.85137e-19
HHEX	116.155	205.988	473.53	292.755	4.46553	11.4187	-4.1766	3.53429e-38
TNFSF15	1.13797	0.699644	0.113634	0.528311	0.018018	0.0714134	-4.1801	3.85729e-18
CPNE5	185.097	192.619	197.764	214.627	7.73065	8.93633	-4.26704	8.40475e-133
HLA-DOA	1322.42	1345.49	1560.24	746.082	60.114	53.9535	-4.29095	6.31744e-103
MLYCD	0.362128	0.639096	0.265958	0	0.0435764	0	-4.29489	1.60404e-08
TMEM132B	0.897315	1.65588	3.35171	1.36316	0.104603	0	-4.319	3.39683e-05
HLA-DPB1	29.8521	33.4312	30.905	13.7705	1.42712	1.17666	-4.33062	1.14795e-94
NLRP4	5.76426	14.8129	46.3123	11.029	0.0731387	0.81923	-4.38057	1.35668e-09
PSMB9	11.6243	10.2839	10.6061	11.5204	0.451696	0.395677	-4.4422	6.24021e-57
PDZRN3	8.77126	3.58449	14.4389	222.156	0	0.41459	-4.45254	3.15168e-05
SLC2A14	0.0550386	0.150216	0.0223765	0	0	0.00631794	-4.45902	0.00333339
FHOD3	109.683	122.813	71.2719	28.5992	4.49623	4.19688	-4.49947	2.36486e-22
SMPDL3A	3.44189	3.88926	3.65849	6.55169	0.232039	0.0333215	-4.56106	2.60806e-14
CR2	0.251535	0.291248	0.970371	0.451265	0.0156386	0	-4.83836	9.47577e-09
SYTL4	0.400382	0.832512	1.44973	1.28746	0.0210362	0.0135939	-4.90142	1.59058e-13
TMEM185B	2.77967	1.13677	3.21946	1.65542	0.0602857	0.0389575	-5.03469	4.47306e-15
TTLL9	1.2627	1.44544	0.108895	0.149473	0	0.0461195	-5.2783	5.37669e-07
GPR65	0.288524	0.21201	0.905332	1.69545	0	0.00891693	-5.35164	2.6582e-12
STXBP6	0.856763	1.19435	3.92209	0.154131	0.0210265	0.0181169	-5.47025	3.69212e-28
ANKRD33B	40.7673	63.2929	227.599	27.8956	0.716377	1.29327	-5.4833	2.98052e-87
RHOBTB3	1.56434	2.02263	1.35208	0.33195	0.0648392	0	-5.51712	9.25686e-14
TES	1.51474	0.613406	1.44438	3.61775	0.0146387	0.0168173	-5.82459	3.65644e-22
PCLO	0.470176	1.90543	10.3422	2.52545	0.01827	0.0157418	-5.83724	4.27161e-11
SORBS2	0.0971985	0.0964665	0.131723	1.61521	0	0	-5.88356	0.0088351
ST3GAL6	1.58116	2.28849	86.2468	5.71908	0	0	-5.96336	0.00717432
MYL2	0.0415829	0.036111	0	0.0496341	0	0	-5.97935	0.00630719
CDH13	0.115994	0.143901	0.031439	0.0287694	0	0	-6.05422	0.00488268
SH3RF1	2.63526	1.60194	1.49994	1.37258	0	0	-6.07697	0.00523536
HCP5	0.724015	0.636601	0.772682	0.369248	0	0.0145443	-6.08798	6.60768e-19
LSAMP	9.80578	2.37297	0.151935	0.45115	0.115834	0.0105058	-6.16524	1.48139e-10
NEFH	0.0783001	0.254987	0.185696	0.135942	0	0	-6.18332	0.00645715
C12orf74	0.0739862	0.273064	0.122826	0.594094	0	0	-6.3225	0.00422131
TRPC6	0.0181809	0.0421027	0.422555	0.291979	0	0	-6.40157	0.00197197
MIR146A	0.0622555	0.153179	0.00984299	0.0540431	0	0	-6.46311	0.00159977
CCDC149	0.310227	0.269404	0.0490488	0	0	0	-6.5567	0.000403386
WNT6	0.219726	0.176135	0.464983	0.909689	0	0	-6.6176	0.000315026
NCKAP5	0.32292	0.307486	0	0.0221307	0.00528336	0	-6.62052	8.80539e-23
LAIR1	0.0190279	0.231336	4.56679	3.48527	0	0	-6.80829	0.00234559
PDCD1	0.0917327	0.119492	0	0.013272	0	0	-6.86251	6.89989e-05
TLR3	0.10316	0.140777	0.0139802	0.0127931	0	0	-7.12199	9.25387e-06
COBLL1	0.212023	0.142277	0.0365696	0.476868	0	0	-7.25976	2.88346e-06
LILRB2	0.00476067	0.0847513	0.090323	0.134312	0	0	-7.31879	0.000363016
AMIGO2	0.177916	0.285832	0.616039	1.26646	0	0	-7.77595	8.61711e-09
SPAG16	18.2423	17.1419	18.8833	22.3339	0.05171	0.0668316	-7.934	5.03606e-61
ZNF597	1.43781	1.69623	0.931612	1.30466	0.0101199	0	-7.99613	2.49375e-34
RRAS2	5.48913	1.00641	0.715882	0.0467925	0.0167565	0	-8.26732	5.53308e-16
PGBD5	17.0072	13.4442	1.48814	2.85006	0.0639548	0.0137762	-8.41785	1.94042e-125
NLGN4X	0.73106	0.0151157	0	0	0	0	-8.46619	1.34529e-05
LILRB1	1.26984	7.00665	8.31187	13.44	0.0182191	0	-8.5156	7.01146e-17
PPARG	0.0699826	1.1547	7.46203	0.0729011	0	0	-8.52855	6.88163e-07
CLCN7	10.7874	10.5342	11.4156	14.2331	0.0200402	0	-9.78607	1.27994e-88
USP40	6.72537	6.17167	7.62908	7.9908	0.0114767	0	-9.86511	8.5864e-94
HES6	1.29255	1.26277	0.641818	0.86783	0	0	-10.0414	1.31591e-27
FAT3	0	1.97664	0	0.00938671	0	0	-10.5852	3.64612e-05
RUNX1T1	3.58731	3.51339	35.2132	1.31965	0	0	-11.8431	1.11736e-50
CALCRL	4.17589	12.8621	6.88424	0.0271538	0	0	-12.1538	2.20222e-31
IGF2BP1	187.205	52.8227	0	0.256325	0	0	-12.7164	1.5205e-34

## Sheet: Table S3
Table S3: Hypergeometric gene set enrichment analysis of differential H3K27Ac between WT and R1446C CRISPR cells
Gene set name	Target set name	P-value
GC_B_cell_U133Plus GC_B_cell_U133Plus	Genes with increased H3K27Ac in R1446C vs WT	1.97535e-06
GC_B_cell_BL_equal_DLBCL GC_B_cell_BL_equal_DLBCL	Genes with increased H3K27Ac in R1446C vs WT	6.92113e-06
msig_247 MULLIGHAN_MLL_SIGNATURE_2_DN	Genes with increased H3K27Ac in R1446C vs WT	3.55763e-05
msig_271 UDAYAKUMAR_MED1_TARGETS_DN	Genes with increased H3K27Ac in R1446C vs WT	5.23354e-05
msig_286 HUMMEL_BURKITTS_LYMPHOMA_UP	Genes with increased H3K27Ac in R1446C vs WT	0.000101107
msig_448 GAUSSMANN_MLL_AF4_FUSION_TARGETS_F_UP	Genes with increased H3K27Ac in R1446C vs WT	0.000173122
msig_115 CASORELLI_ACUTE_PROMYELOCYTIC_LEUKEMIA_UP	Genes with increased H3K27Ac in R1446C vs WT	0.000322153
GC_T_helper_up_Kim GC_T_helper_up_Kim	Genes with increased H3K27Ac in R1446C vs WT	0.000397964
PID_NOTCH_PATHWAY Notch signaling pathway	Genes with increased H3K27Ac in R1446C vs WT	0.000464158
ZAP70 interaction with ZAP70	Genes with increased H3K27Ac in R1446C vs WT	0.000502599
msig_309 KIM_WT1_TARGETS_UP	Genes with increased H3K27Ac in R1446C vs WT	0.00050566
msig_29 HOLLMAN_APOPTOSIS_VIA_CD40_DN	Genes with increased H3K27Ac in R1446C vs WT	0.000636209
h_achPathway Role of nicotinic acetylcholine receptors in the regulation of apoptosis	Genes with increased H3K27Ac in R1446C vs WT	0.000795935
LRPAP1 interaction with LRPAP1	Genes with increased H3K27Ac in R1446C vs WT	0.00107376
msig_1370 MARSON_FOXP3_TARGETS_STIMULATED_DN	Genes with increased H3K27Ac in R1446C vs WT	0.00107376
msig_823 SPIELMAN_LYMPHOBLAST_EUROPEAN_VS_ASIAN_2FC_DN	Genes with increased H3K27Ac in R1446C vs WT	0.0011378
msig_183 SMIRNOV_CIRCULATING_ENDOTHELIOCYTES_IN_CANCER_UP	Genes with increased H3K27Ac in R1446C vs WT	0.00116873
Myeloma_HY_subgroup_up Myeloma_HY_subgroup_up	Genes with increased H3K27Ac in R1446C vs WT	0.00142879
BIOCARTA_AKT_PATHWAY AKT Signaling Pathway	Genes with increased H3K27Ac in R1446C vs WT	0.00157734
CLIP1 interaction with CLIP1	Genes with increased H3K27Ac in R1446C vs WT	0.00172291
HLA-E interaction with HLA-E	Genes with increased H3K27Ac in R1446C vs WT	0.00172291
msig_245 MULLIGHAN_MLL_SIGNATURE_1_DN	Genes with increased H3K27Ac in R1446C vs WT	0.00293986
msig_1340 KRIGE_AMINO_ACID_DEPRIVATION	Genes with increased H3K27Ac in R1446C vs WT	0.00299824
KEGG_VALINE_LEUCINE_AND_ISOLEUCINE_DEGRADATION Valine, leucine and isoleucine degradation	Genes with increased H3K27Ac in R1446C vs WT	0.00319403
msig_672 HEIDENBLAD_AMPLIFIED_IN_BONE_CANCER	Genes with increased H3K27Ac in R1446C vs WT	0.00329885
BIOCARTA_KERATINOCYTE_PATHWAY Keratinocyte Differentiation	Genes with increased H3K27Ac in R1446C vs WT	0.00386429
msig_2326 DAZARD_RESPONSE_TO_UV_NHEK_DN	Genes with increased H3K27Ac in R1446C vs WT	0.00449942
msig_708 DAUER_STAT3_TARGETS_UP	Genes with increased H3K27Ac in R1446C vs WT	0.00528839
GO:0007417 central nervous system development	Genes with increased H3K27Ac in R1446C vs WT	0.00550012
REACTOME_DEADENYLATION_DEPENDENT_MRNA_DECAY Genes involved in Deadenylation-dependent mRNA decay	Genes with increased H3K27Ac in R1446C vs WT	0.0055564
GO:0048193 Golgi vesicle transport	Genes with increased H3K27Ac in R1446C vs WT	0.00571345
msig_2325 DAZARD_UV_RESPONSE_CLUSTER_G6	Genes with increased H3K27Ac in R1446C vs WT	0.00612123
c2.Crebbp.up_205	Genes with increased H3K27Ac in R1446C vs WT	0.00728535
GO:0001510 RNA methylation	Genes with increased H3K27Ac in R1446C vs WT	0.00947824
RPS6KA5 interaction with RPS6KA5	Genes with increased H3K27Ac in R1446C vs WT	0.00947824
TFAM interaction with TFAM	Genes with increased H3K27Ac in R1446C vs WT	0.00947824
h_aktPathway AKT Signaling Pathway	Genes with increased H3K27Ac in R1446C vs WT	0.0140396
msig_2015 DANG_REGULATED_BY_MYC_DN	Genes with increased H3K27Ac in R1446C vs WT	0.0161964
GO:0045786 negative regulation of cell cycle	Genes with increased H3K27Ac in R1446C vs WT	0.019449
GO:0006665 sphingolipid metabolic process	Genes with increased H3K27Ac in R1446C vs WT	0.0206472
msig_1930 MARSON_FOXP3_TARGETS_UP	Genes with increased H3K27Ac in R1446C vs WT	0.0317726
GO:0048011 nerve growth factor receptor signaling pathway	Genes with increased H3K27Ac in R1446C vs WT	0.0422189
PTPRA interaction with PTPRA	Genes with increased H3K27Ac in R1446C vs WT	0.0422189
KEGG_LYSOSOME	Genes with increased H3K27Ac in R1446C vs WT	0.04991
msig_1031 NIKOLSKY_BREAST_CANCER_16P13_AMPLICON	Genes with decreased H3K27Ac in R1446C vs WT	7.61324e-11
IL10_OCILy3_Up IL10_OCILy3_Up	Genes with decreased H3K27Ac in R1446C vs WT	1.98593e-09
Myc_ChIP_PET_Expr_Down Myc_ChIP_PET_Expr_Down	Genes with decreased H3K27Ac in R1446C vs WT	1.32044e-07
msig_75 DAVICIONI_TARGETS_OF_PAX_FOXO1_FUSIONS_UP	Genes with decreased H3K27Ac in R1446C vs WT	1.64979e-07
Blimp_Bcell_repressed Blimp_Bcell_repressed	Genes with decreased H3K27Ac in R1446C vs WT	3.14583e-07
Tcell_PIind4x_Feske_Fig6 Tcell_PIind4x_Feske_Fig6	Genes with decreased H3K27Ac in R1446C vs WT	1.26466e-06
Robles_Em_NKX2_3_upreg Robles_Em_NKX2_3_upreg	Genes with decreased H3K27Ac in R1446C vs WT	2.61304e-06
Resting_blood_B_cell_GNF Resting_blood_B_cell_GNF	Genes with decreased H3K27Ac in R1446C vs WT	5.28631e-06
msig_1407 HELLER_SILENCED_BY_METHYLATION_UP	Genes with decreased H3K27Ac in R1446C vs WT	6.13408e-06
NFkB_all_OCILy3_Ly10 NFkB_all_OCILy3_Ly10	Genes with decreased H3K27Ac in R1446C vs WT	6.26161e-06
STAT3_up_OCILy10 STAT3_up_OCILy10	Genes with decreased H3K27Ac in R1446C vs WT	8.17127e-06
msig_325 JAATINEN_HEMATOPOIETIC_STEM_CELL_DN	Genes with decreased H3K27Ac in R1446C vs WT	1.12726e-05
GC_B_cell_U133Plus GC_B_cell_U133Plus	Genes with decreased H3K27Ac in R1446C vs WT	1.92823e-05
msig_1003 MORI_MATURE_B_LYMPHOCYTE_UP	Genes with decreased H3K27Ac in R1446C vs WT	2.26611e-05
PDPK1 interaction with PDPK1	Genes with decreased H3K27Ac in R1446C vs WT	2.62517e-05
GC_T_helper_up4x_Chtanova GC_T_helper_up4x_Chtanova	Genes with decreased H3K27Ac in R1446C vs WT	2.92121e-05
Oricchio_genes_deleted_in_FL Oricchio_genes_deleted_in_FL	Genes with decreased H3K27Ac in R1446C vs WT	3.15514e-05
Hematopoietic_Node1658 Hematopoietic_Node1658	Genes with decreased H3K27Ac in R1446C vs WT	4.32414e-05
Quiescence_heme_all Quiescence_heme_all	Genes with decreased H3K27Ac in R1446C vs WT	4.33684e-05
Dendritic_cell_CD123pos_blood Dendritic_cell_CD123pos_blood	Genes with decreased H3K27Ac in R1446C vs WT	4.34913e-05
msig_1313 BASSO_CD40_SIGNALING_UP	Genes with decreased H3K27Ac in R1446C vs WT	5.42439e-05
Tcell_PIind4x_Feske_Fig4 Tcell_PIind4x_Feske_Fig4	Genes with decreased H3K27Ac in R1446C vs WT	5.78639e-05
Tcell_cytokine_induced_PMBConly_Iinduced Tcell_cytokine_induced_PMBConly_Iinduced	Genes with decreased H3K27Ac in R1446C vs WT	6.53731e-05
msig_306 NAGASHIMA_NRG1_SIGNALING_UP	Genes with decreased H3K27Ac in R1446C vs WT	6.83539e-05
HIF1alpha_1.5x_Up HIF1alpha_1.5x_Up	Genes with decreased H3K27Ac in R1446C vs WT	7.75151e-05
Figueroa_ALL_downreg_T_ALL Figueroa_ALL_downreg_T_ALL	Genes with decreased H3K27Ac in R1446C vs WT	8.55272e-05
msig_1412 HELLER_HDAC_TARGETS_SILENCED_BY_METHYLATION_DN	Genes with decreased H3K27Ac in R1446C vs WT	9.77048e-05
Tcell_PIind_CalciumDefPtdown4x_Feske_Fig6 Tcell_PIind_CalciumDefPtdown4x_Feske_Fig6	Genes with decreased H3K27Ac in R1446C vs WT	0.000126856
STAT3high_ABC_DLBCL_subgroup STAT3high_ABC_DLBCL_subgroup	Genes with decreased H3K27Ac in R1446C vs WT	0.000130721
PID_P53DOWNSTREAMPATHWAY Direct p53 effectors	Genes with decreased H3K27Ac in R1446C vs WT	0.000152131
msig_1410 HELLER_HDAC_TARGETS_DN	Genes with decreased H3K27Ac in R1446C vs WT	0.000154013
Cerchietti_Farage_PUH71_treatment_downreg Cerchietti_Farage_PUH71_treatment_downreg	Genes with decreased H3K27Ac in R1446C vs WT	0.000163802
Li_cluster1_vs_cluster3_downreg Li_cluster1_vs_cluster3_downreg	Genes with decreased H3K27Ac in R1446C vs WT	0.000190306
msig_1134 TARTE_PLASMA_CELL_VS_B_LYMPHOCYTE_DN	Genes with decreased H3K27Ac in R1446C vs WT	0.000192763
Thymic_SP_CD4+Tcell_gt_Blood_CD4+Tcell Thymic_SP_CD4+Tcell_gt_Blood_CD4+Tcell	Genes with decreased H3K27Ac in R1446C vs WT	0.000216794
GC_B_cell_BL_equal_DLBCL GC_B_cell_BL_equal_DLBCL	Genes with decreased H3K27Ac in R1446C vs WT	0.000238586
Tcell_PIind_CsAdown4x Tcell_PIind_CsAdown4x	Genes with decreased H3K27Ac in R1446C vs WT	0.000261635
HammerichHille_siSAFB1plus2_upreg HammerichHille_siSAFB1plus2_upreg	Genes with decreased H3K27Ac in R1446C vs WT	0.000276752
PID_IFNG_PATHWAY	Genes with decreased H3K27Ac in R1446C vs WT	0.000292352
Quiescence_heme_cluster1 Quiescence_heme_cluster1	Genes with decreased H3K27Ac in R1446C vs WT	0.000299021
Leucine_starve_up Leucine_starve_up	Genes with decreased H3K27Ac in R1446C vs WT	0.000299674
CD40_upregulated_Burkitt_lymphoma CD40_upregulated_Burkitt_lymphoma	Genes with decreased H3K27Ac in R1446C vs WT	0.0003065
msig_1733 PARK_TRETINOIN_RESPONSE_AND_RARA_PLZF_FUSION	Genes with decreased H3K27Ac in R1446C vs WT	0.000311839
msig_998 MORI_LARGE_PRE_BII_LYMPHOCYTE_DN	Genes with decreased H3K27Ac in R1446C vs WT	0.000319301
Pan_B_U133plus Pan_B_U133plus	Genes with decreased H3K27Ac in R1446C vs WT	0.00034917
h_alkPathway ALK in cardiac myocytes	Genes with decreased H3K27Ac in R1446C vs WT	0.000367978
Fiskus_CLL_AFtreatment_downreg Fiskus_CLL_AFtreatment_downreg	Genes with decreased H3K27Ac in R1446C vs WT	0.000476576
msig_478 WANG_ESOPHAGUS_CANCER_VS_NORMAL_UP	Genes with decreased H3K27Ac in R1446C vs WT	0.000490712
msig_1001 MORI_IMMATURE_B_LYMPHOCYTE_UP	Genes with decreased H3K27Ac in R1446C vs WT	0.000527318
msig_32 LIU_SOX4_TARGETS_UP	Genes with decreased H3K27Ac in R1446C vs WT	0.000556838
Teater_VavPBcl2_AICDAleadingEdge Teater_VavPBcl2_AICDAleadingEdge	Genes with decreased H3K27Ac in R1446C vs WT	0.000568107
Polo_iPSC_cluster9 Polo_iPSC_cluster9	Genes with decreased H3K27Ac in R1446C vs WT	0.000623516
GO:0032582 negative regulation of gene-specific transcription	Genes with decreased H3K27Ac in R1446C vs WT	0.000666994
PID_IL4_2PATHWAY IL4-mediated signaling events	Genes with decreased H3K27Ac in R1446C vs WT	0.000668939
GO:0007411 axon guidance	Genes with decreased H3K27Ac in R1446C vs WT	0.000681883
REACTOME_CLASS_I_MHC_MEDIATED_ANTIGEN_PROCESSING_PRESENTATION Genes involved in Class I MHC mediated antigen processing & presentation	Genes with decreased H3K27Ac in R1446C vs WT	0.000682123
KEGG_UBIQUITIN_MEDIATED_PROTEOLYSIS Ubiquitin mediated proteolysis	Genes with decreased H3K27Ac in R1446C vs WT	0.000689889
Tcell_PIrep_CalciumDefPtup4x_Feske_Fig6 Tcell_PIrep_CalciumDefPtup4x_Feske_Fig6	Genes with decreased H3K27Ac in R1446C vs WT	0.00073691
msig_994 ZHANG_RESPONSE_TO_IKK_INHIBITOR_AND_TNF_UP	Genes with decreased H3K27Ac in R1446C vs WT	0.000759563
msig_556 PEREZ_TP53_AND_TP63_TARGETS	Genes with decreased H3K27Ac in R1446C vs WT	0.000759563
BIOCARTA_ALK_PATHWAY ALK in cardiac myocytes	Genes with decreased H3K27Ac in R1446C vs WT	0.000838799
IL6_Ly10_Up_all IL6_Ly10_Up_all	Genes with decreased H3K27Ac in R1446C vs WT	0.000838799
NFkB_bothOCILy3andLy10 NFkB_bothOCILy3andLy10	Genes with decreased H3K27Ac in R1446C vs WT	0.000838799
msig_274 ODONNELL_TARGETS_OF_MYC_AND_TFRC_UP	Genes with decreased H3K27Ac in R1446C vs WT	0.000840938
Thymic_DP_Tcell_gt_Thymic_progenitor_Tcell Thymic_DP_Tcell_gt_Thymic_progenitor_Tcell	Genes with decreased H3K27Ac in R1446C vs WT	0.000969309
msig_1435 FINETTI_BREAST_CANCER_KINOME_GREEN	Genes with decreased H3K27Ac in R1446C vs WT	0.00101241
msig_729 DIRMEIER_LMP1_RESPONSE_LATE_UP	Genes with decreased H3K27Ac in R1446C vs WT	0.00102502
BIOCARTA_NTHI_PATHWAY NFkB activation by Nontypeable Hemophilus influenzae	Genes with decreased H3K27Ac in R1446C vs WT	0.00103385
CD8_T_effectorDn_memoryIm_NaiveUp CD8_T_effectorDn_memoryIm_NaiveUp	Genes with decreased H3K27Ac in R1446C vs WT	0.00109393
msig_218 TAKEDA_TARGETS_OF_NUP98_HOXA9_FUSION_3D_UP	Genes with decreased H3K27Ac in R1446C vs WT	0.00114183
REACTOME_CYTOKINE_SIGNALING_IN_IMMUNE_SYSTEM	Genes with decreased H3K27Ac in R1446C vs WT	0.00124801
Tcell_PIrep4x_Feske_Fig4 Tcell_PIrep4x_Feske_Fig4	Genes with decreased H3K27Ac in R1446C vs WT	0.0013332
REACTOME_ANTIGEN_PROCESSING_UBIQUITINATION_PROTEASOME_DEGRADATION Genes involved in Antigen processing: Ubiquitination & Proteasome degradation	Genes with decreased H3K27Ac in R1446C vs WT	0.00133623
msig_13 PICCALUGA_ANGIOIMMUNOBLASTIC_LYMPHOMA_DN	Genes with decreased H3K27Ac in R1446C vs WT	0.00133623
CD19 interaction with CD19	Genes with decreased H3K27Ac in R1446C vs WT	0.00140525
B_cell_up_anergy B_cell_up_anergy	Genes with decreased H3K27Ac in R1446C vs WT	0.00140525
NFkB_OCILy10_only NFkB_OCILy10_only	Genes with decreased H3K27Ac in R1446C vs WT	0.00140525
msig_40 DAVICIONI_PAX_FOXO1_SIGNATURE_IN_ARMS_UP	Genes with decreased H3K27Ac in R1446C vs WT	0.00146984
msig_807 CALVET_IRINOTECAN_SENSITIVE_VS_RESISTANT_UP	Genes with decreased H3K27Ac in R1446C vs WT	0.00159796
IL6_Ly10_Up_group1 IL6_Ly10_Up_group1	Genes with decreased H3K27Ac in R1446C vs WT	0.00169441
Tcell_PIrep_CalciumDefPtup4x_Feske_Fig4 Tcell_PIrep_CalciumDefPtup4x_Feske_Fig4	Genes with decreased H3K27Ac in R1446C vs WT	0.00169441
ly1.promoter.BCL6SMRT.only.93	Genes with decreased H3K27Ac in R1446C vs WT	0.00177272
HALLMARK_INTERFERON_GAMMA_RESPONSE	Genes with decreased H3K27Ac in R1446C vs WT	0.00189801
PID_IFNGPATHWAY IFN-gamma pathway	Genes with decreased H3K27Ac in R1446C vs WT	0.00198292
GO:0031145 anaphase-promoting complex-dependent proteasomal ubiquitin-dependent protein catabolic process	Genes with decreased H3K27Ac in R1446C vs WT	0.00216227
GO:0051436 negative regulation of ubiquitin-protein ligase activity during mitotic cell cycle	Genes with decreased H3K27Ac in R1446C vs WT	0.00216227
h_nthiPathway NFkB activation by Nontypeable Hemophilus influenzae	Genes with decreased H3K27Ac in R1446C vs WT	0.00233126
GC_B_cell_BLlow_DLBCLhigh GC_B_cell_BLlow_DLBCLhigh	Genes with decreased H3K27Ac in R1446C vs WT	0.00234112
msig_1189 LU_IL4_SIGNALING	Genes with decreased H3K27Ac in R1446C vs WT	0.00244403
Figueroa_ALL_downreg_TCF3 Figueroa_ALL_downreg_TCF3	Genes with decreased H3K27Ac in R1446C vs WT	0.00251064
BIOCARTA_TGFB_PATHWAY TGF beta signaling pathway	Genes with decreased H3K27Ac in R1446C vs WT	0.00251064
msig_162 CHOI_ATL_CHRONIC_VS_ACUTE_DN	Genes with decreased H3K27Ac in R1446C vs WT	0.00251064
PID_PI3KCIPATHWAY Class I PI3K signaling events	Genes with decreased H3K27Ac in R1446C vs WT	0.00272362
CENPH interaction with CENPH	Genes with decreased H3K27Ac in R1446C vs WT	0.0031193
msig_1088 GOLUB_ALL_VS_AML_UP	Genes with decreased H3K27Ac in R1446C vs WT	0.00325219
msig_684 LI_CISPLATIN_RESISTANCE_UP	Genes with decreased H3K27Ac in R1446C vs WT	0.00391766
Tcell_cytokine_induced_PMBC_Bcell_induced Tcell_cytokine_induced_PMBC_Bcell_induced	Genes with decreased H3K27Ac in R1446C vs WT	0.00391766
PID_IL2_1PATHWAY IL2-mediated signaling events	Genes with decreased H3K27Ac in R1446C vs WT	0.00416865
PID_BCR_5PATHWAY BCR signaling pathway	Genes with decreased H3K27Ac in R1446C vs WT	0.00416865
msig_1263 HADDAD_B_LYMPHOCYTE_PROGENITOR	Genes with decreased H3K27Ac in R1446C vs WT	0.00426754
h_tgfbPathway TGF beta signaling pathway	Genes with decreased H3K27Ac in R1446C vs WT	0.00461724
GO:0045321 leukocyte activation	Genes with decreased H3K27Ac in R1446C vs WT	0.00510451
c2.Crebbp.up_205	Genes with decreased H3K27Ac in R1446C vs WT	0.0054832
PID_P38ALPHABETAPATHWAY Regulation of p38-alpha and p38-beta	Genes with decreased H3K27Ac in R1446C vs WT	0.0056139
REACTOME_ACTIVATION_OF_NF_KAPPAB_IN_B_CELLS Genes involved in Activation of NF-kappaB in B Cells	Genes with decreased H3K27Ac in R1446C vs WT	0.00581536
GO:0001775 cell activation	Genes with decreased H3K27Ac in R1446C vs WT	0.00583251
REACTOME_DOWNREGULATION_OF_TGF_BETA_RECEPTOR_SIGNALING Genes involved in Downregulation of TGF-beta receptor signaling	Genes with decreased H3K27Ac in R1446C vs WT	0.00640737
msig_629 MYLLYKANGAS_AMPLIFICATION_HOT_SPOT_23	Genes with decreased H3K27Ac in R1446C vs WT	0.00640737
PID_BMPPATHWAY BMP receptor signaling	Genes with decreased H3K27Ac in R1446C vs WT	0.00707796
GO:0051352 negative regulation of ligase activity	Genes with decreased H3K27Ac in R1446C vs WT	0.00722696
GO:0051444 negative regulation of ubiquitin-protein ligase activity	Genes with decreased H3K27Ac in R1446C vs WT	0.00722696
CREBBP_mut_down_278_Green_FL	Genes with decreased H3K27Ac in R1446C vs WT	0.00756285
msig_2347 GENTILE_UV_RESPONSE_CLUSTER_D2	Genes with decreased H3K27Ac in R1446C vs WT	0.00779166
msig_1790 LEE_DIFFERENTIATING_T_LYMPHOCYTE	Genes with decreased H3K27Ac in R1446C vs WT	0.00796637
REACTOME_NRAGE_SIGNALS_DEATH_THROUGH_JNK Genes involved in NRAGE signals death through JNK	Genes with decreased H3K27Ac in R1446C vs WT	0.00809315
ACP1 interaction with ACP1	Genes with decreased H3K27Ac in R1446C vs WT	0.00900984
PID_EPHA_FWDPATHWAY EPHA forward signaling	Genes with decreased H3K27Ac in R1446C vs WT	0.00908249
msig_934 PASQUALUCCI_LYMPHOMA_BY_GC_STAGE_DN	Genes with decreased H3K27Ac in R1446C vs WT	0.00916998
REACTOME_TGF_BETA_RECEPTOR_SIGNALING_ACTIVATES_SMADS Genes involved in TGF-beta receptor signaling activates SMADs	Genes with decreased H3K27Ac in R1446C vs WT	0.00942803
REACTOME_APC_C_CDC20_MEDIATED_DEGRADATION_OF_MITOTIC_PROTEINS Genes involved in APC/C:Cdc20 mediated degradation of mitotic proteins	Genes with decreased H3K27Ac in R1446C vs WT	0.0105191
GO:0006688 glycosphingolipid biosynthetic process	Genes with decreased H3K27Ac in R1446C vs WT	0.011335
msig_1181 SHIPP_DLBCL_VS_FOLLICULAR_LYMPHOMA_DN	Genes with decreased H3K27Ac in R1446C vs WT	0.0117812
GO:0006511 ubiquitin-dependent protein catabolic process	Genes with decreased H3K27Ac in R1446C vs WT	0.0138164
GO:0019941 modification-dependent protein catabolic process	Genes with decreased H3K27Ac in R1446C vs WT	0.0138164
GO:0043632 modification-dependent macromolecule catabolic process	Genes with decreased H3K27Ac in R1446C vs WT	0.0138164
CSF1R interaction with CSF1R	Genes with decreased H3K27Ac in R1446C vs WT	0.0155278
msig_1194 MANALO_HYPOXIA_UP	Genes with decreased H3K27Ac in R1446C vs WT	0.0160966
GO:0051603 proteolysis involved in cellular protein catabolic process	Genes with decreased H3K27Ac in R1446C vs WT	0.0200745
REACTOME_AUTODEGRADATION_OF_THE_E3_UBIQUITIN_LIGASE_COP1 Genes involved in Autodegradation of the E3 ubiquitin ligase COP1	Genes with decreased H3K27Ac in R1446C vs WT	0.0204765
GO:0044257 cellular protein catabolic process	Genes with decreased H3K27Ac in R1446C vs WT	0.0212103
msig_1747 RUTELLA_RESPONSE_TO_HGF_DN	Genes with decreased H3K27Ac in R1446C vs WT	0.0222887
msig_2323 DAZARD_UV_RESPONSE_CLUSTER_G3	Genes with decreased H3K27Ac in R1446C vs WT	0.0261876
GO:0002347 response to tumor cell	Genes with decreased H3K27Ac in R1446C vs WT	0.0278558
NLGN3 interaction with NLGN3	Genes with decreased H3K27Ac in R1446C vs WT	0.0278558
ly1.promoter.BCL6.alone.906	Genes with decreased H3K27Ac in R1446C vs WT	0.031863
GO:0030163 protein catabolic process	Genes with decreased H3K27Ac in R1446C vs WT	0.0322457
msig_2114 LU_AGING_BRAIN_UP	Genes with decreased H3K27Ac in R1446C vs WT	0.0341635
REACTOME_INTERFERON_GAMMA_SIGNALING Genes involved in Interferon gamma signaling	Genes with decreased H3K27Ac in R1446C vs WT	0.035595
NEDD9 interaction with NEDD9	Genes with decreased H3K27Ac in R1446C vs WT	0.0402522
REACTOME_CELL_CYCLE_CHECKPOINTS Genes involved in Cell Cycle Checkpoints	Genes with decreased H3K27Ac in R1446C vs WT	0.0417683
KEGG_CYTOKINE_CYTOKINE_RECEPTOR_INTERACTION	Genes with decreased H3K27Ac in R1446C vs WT	0.0447606
IFN_PMBC_2x_Up	Genes with decreased H3K27Ac in R1446C vs WT	0.0453251

## Sheet: Table S4
Table S4: Hypergeometric gene set enrichment analysis of differentially expressed genes between WT and R1446C CRISPR cells
Gene set name	Target set name	P-value
msig_29 HOLLMAN_APOPTOSIS_VIA_CD40_DN	Genes with increased expression in R1446C vs WT	4.82677e-13
msig_709 DAUER_STAT3_TARGETS_DN	Genes with increased expression in R1446C vs WT	1.80688e-08
msig_369 PROVENZANI_METASTASIS_DN	Genes with increased expression in R1446C vs WT	8.21224e-08
msig_702 EINAV_INTERFERON_SIGNATURE_IN_CANCER	Genes with increased expression in R1446C vs WT	8.24229e-08
Teater_humanDLBCL_AICDAleadingEdge Teater_humanDLBCL_AICDAleadingEdge	Genes with increased expression in R1446C vs WT	2.21823e-07
msig_679 BOWIE_RESPONSE_TO_EXTRACELLULAR_MATRIX	Genes with increased expression in R1446C vs WT	2.35218e-07
Splenic_marginal_zone_Bcell_gt_GC_Bcell Splenic_marginal_zone_Bcell_gt_GC_Bcell	Genes with increased expression in R1446C vs WT	4.29328e-07
msig_224 TAKEDA_TARGETS_OF_NUP98_HOXA9_FUSION_16D_UP	Genes with increased expression in R1446C vs WT	4.57879e-07
msig_218 TAKEDA_TARGETS_OF_NUP98_HOXA9_FUSION_3D_UP	Genes with increased expression in R1446C vs WT	5.52068e-07
msig_247 MULLIGHAN_MLL_SIGNATURE_2_DN	Genes with increased expression in R1446C vs WT	5.54287e-07
msig_115 CASORELLI_ACUTE_PROMYELOCYTIC_LEUKEMIA_UP	Genes with increased expression in R1446C vs WT	1.89183e-06
KEGG_LYSOSOME Lysosome	Genes with increased expression in R1446C vs WT	2.35179e-06
msig_220 TAKEDA_TARGETS_OF_NUP98_HOXA9_FUSION_8D_UP	Genes with increased expression in R1446C vs WT	4.50643e-06
msig_1440 MASSARWEH_TAMOXIFEN_RESISTANCE_DN	Genes with increased expression in R1446C vs WT	5.40858e-06
GC_T_helper_up4x_Chtanova GC_T_helper_up4x_Chtanova	Genes with increased expression in R1446C vs WT	5.89395e-06
msig_222 TAKEDA_TARGETS_OF_NUP98_HOXA9_FUSION_10D_UP	Genes with increased expression in R1446C vs WT	6.95742e-06
msig_764 WOOD_EBV_EBNA1_TARGETS_UP	Genes with increased expression in R1446C vs WT	8.07088e-06
Shih_Tet2_FLT3ITD_synergistic_hypermethyl_downreg Shih_Tet2_FLT3ITD_synergistic_hypermethyl_downreg	Genes with increased expression in R1446C vs WT	9.51126e-06
Clozel_doxorubicinResistant_cell_line_repressed Clozel_doxorubicinResistant_cell_line_repressed	Genes with increased expression in R1446C vs WT	2.05413e-05
Myc_ChIP_PET_Expr_Down Myc_ChIP_PET_Expr_Down	Genes with increased expression in R1446C vs WT	2.53913e-05
msig_885 GUENTHER_GROWTH_SPHERICAL_VS_ADHERENT_DN	Genes with increased expression in R1446C vs WT	2.65011e-05
msig_680 BOWIE_RESPONSE_TO_TAMOXIFEN	Genes with increased expression in R1446C vs WT	3.95616e-05
Brown_DMSO_treated_OCI_AML2_vs_MRT199665_upreg Brown_DMSO_treated_OCI_AML2_vs_MRT199665_upreg	Genes with increased expression in R1446C vs WT	4.24379e-05
Splenic_Marginal_zone_Bcell_gt_naive_and_GC_Bcell Splenic_Marginal_zone_Bcell_gt_naive_and_GC_Bcell	Genes with increased expression in R1446C vs WT	4.45332e-05
msig_2292 DEBIASI_APOPTOSIS_BY_REOVIRUS_INFECTION_DN	Genes with increased expression in R1446C vs WT	5.54526e-05
Polo_iPSC_cluster5 Polo_iPSC_cluster5	Genes with increased expression in R1446C vs WT	6.74243e-05
msig_809 FURUKAWA_DUSP6_TARGETS_PCI35_UP	Genes with increased expression in R1446C vs WT	7.34244e-05
PLXNB1 interaction with PLXNB1	Genes with increased expression in R1446C vs WT	7.36104e-05
msig_1273 ROETH_TERT_TARGETS_UP	Genes with increased expression in R1446C vs WT	7.36104e-05
msig_1794 SHEDDEN_LUNG_CANCER_GOOD_SURVIVAL_A4	Genes with increased expression in R1446C vs WT	7.47524e-05
msig_438 CONCANNON_APOPTOSIS_BY_EPOXOMICIN_UP	Genes with increased expression in R1446C vs WT	8.00942e-05
msig_245 MULLIGHAN_MLL_SIGNATURE_1_DN	Genes with increased expression in R1446C vs WT	0.000106323
Figueroa_ALL_upreg_ETV6 Figueroa_ALL_upreg_ETV6	Genes with increased expression in R1446C vs WT	0.000129188
shCrebbp.up_995	Genes with increased expression in R1446C vs WT	0.000132249
msig_686 XU_HGF_TARGETS_INDUCED_BY_AKT1_6HR	Genes with increased expression in R1446C vs WT	0.000170434
Teater_HumanDLBCLplusAICDA_perturbGenes Teater_HumanDLBCLplusAICDA_perturbGenes	Genes with increased expression in R1446C vs WT	0.000189729
HammerichHille_siSAFB1plus2_upreg HammerichHille_siSAFB1plus2_upreg	Genes with increased expression in R1446C vs WT	0.000189729
msig_717 SEITZ_NEOPLASTIC_TRANSFORMATION_BY_8P_DELETION_UP	Genes with increased expression in R1446C vs WT	0.000190306
msig_141 DOANE_RESPONSE_TO_ANDROGEN_DN	Genes with increased expression in R1446C vs WT	0.000225948
JUP interaction with JUP	Genes with increased expression in R1446C vs WT	0.000229609
GO:0007517 muscle development	Genes with increased expression in R1446C vs WT	0.00023155
HRAS_overexpression_2x_down HRAS_overexpression_2x_down	Genes with increased expression in R1446C vs WT	0.000237375
Serum_response_Fb_up Serum_response_Fb_up	Genes with increased expression in R1446C vs WT	0.000264114
msig_1407 HELLER_SILENCED_BY_METHYLATION_UP	Genes with increased expression in R1446C vs WT	0.000264292
Shih_Tet2_KO_Flt3_ITD_downreg Shih_Tet2_KO_Flt3_ITD_downreg	Genes with increased expression in R1446C vs WT	0.000293664
msig_58 SOTIRIOU_BREAST_CANCER_GRADE_1_VS_3_DN	Genes with increased expression in R1446C vs WT	0.000364285
msig_2015 DANG_REGULATED_BY_MYC_DN	Genes with increased expression in R1446C vs WT	0.000405438
Dendritic_cell_CD123pos_blood Dendritic_cell_CD123pos_blood	Genes with increased expression in R1446C vs WT	0.000425003
Thymic_SP_CD4+Tcell_gt_Blood_CD4+Tcell Thymic_SP_CD4+Tcell_gt_Blood_CD4+Tcell	Genes with increased expression in R1446C vs WT	0.000434846
msig_425 MARKEY_RB1_CHRONIC_LOF_DN	Genes with increased expression in R1446C vs WT	0.000494669
msig_30 LIU_PROSTATE_CANCER_UP	Genes with increased expression in R1446C vs WT	0.000496583
KEGG_TGF_BETA_SIGNALING_PATHWAY TGF-beta signaling pathway	Genes with increased expression in R1446C vs WT	0.000525798
msig_24 KORKOLA_SEMINOMA_UP	Genes with increased expression in R1446C vs WT	0.00054275
msig_1131 BECKER_TAMOXIFEN_RESISTANCE_UP	Genes with increased expression in R1446C vs WT	0.00054275
GZMB interaction with GZMB	Genes with increased expression in R1446C vs WT	0.000661275
msig_1441 MASSARWEH_RESPONSE_TO_ESTRADIOL	Genes with increased expression in R1446C vs WT	0.000753364
msig_1149 DER_IFN_BETA_RESPONSE_UP	Genes with increased expression in R1446C vs WT	0.00078525
msig_1334 BILD_E2F3_ONCOGENIC_SIGNATURE	Genes with increased expression in R1446C vs WT	0.000835576
msig_70 IGARASHI_ATF4_TARGETS_DN	Genes with increased expression in R1446C vs WT	0.000897649
BMX interaction with BMX	Genes with increased expression in R1446C vs WT	0.000898535
KIF5A interaction with KIF5A	Genes with increased expression in R1446C vs WT	0.00108408
msig_750 WEINMANN_ADAPTATION_TO_HYPOXIA_UP	Genes with increased expression in R1446C vs WT	0.00117612
Figueroa_ALL_hypomethyl_MLL_r Figueroa_ALL_hypomethyl_MLL_r	Genes with increased expression in R1446C vs WT	0.00127376
PAX5_repressed PAX5_repressed	Genes with increased expression in R1446C vs WT	0.00128689
c2.Crebbp.up_205	Genes with increased expression in R1446C vs WT	0.00130597
IFN_PMBC_4x_Up IFN_PMBC_4x_Up	Genes with increased expression in R1446C vs WT	0.00136988
msig_1017 NIKOLSKY_BREAST_CANCER_5P15_AMPLICON	Genes with increased expression in R1446C vs WT	0.00141706
msig_1915 WOO_LIVER_CANCER_RECURRENCE_UP	Genes with increased expression in R1446C vs WT	0.00146223
msig_661 FARMER_BREAST_CANCER_CLUSTER_1	Genes with increased expression in R1446C vs WT	0.00150954
Figueroa_AML_cluster14_hypomethyl Figueroa_AML_cluster14_hypomethyl	Genes with increased expression in R1446C vs WT	0.00157005
msig_1373 RIGGINS_TAMOXIFEN_RESISTANCE_DN	Genes with increased expression in R1446C vs WT	0.00159557
Dendritic_cell_CD16pos_blood Dendritic_cell_CD16pos_blood	Genes with increased expression in R1446C vs WT	0.00161705
Li_cluster1_vs_cluster3_downreg Li_cluster1_vs_cluster3_downreg	Genes with increased expression in R1446C vs WT	0.00162852
msig_154 GRABARCZYK_BCL11B_TARGETS_UP	Genes with increased expression in R1446C vs WT	0.00162852
msig_950 STARK_PREFRONTAL_CORTEX_22Q11_DELETION_UP	Genes with increased expression in R1446C vs WT	0.0018466
msig_266 PAPASPYRIDONOS_UNSTABLE_ATEROSCLEROTIC_PLAQUE_UP	Genes with increased expression in R1446C vs WT	0.00188818
BIOCARTA_IL10_PATHWAY IL-10 Anti-inflammatory Signaling Pathway	Genes with increased expression in R1446C vs WT	0.00197464
msig_1993 GUTIERREZ_CHRONIC_LYMPHOCYTIC_LEUKEMIA_DN	Genes with increased expression in R1446C vs WT	0.00210315
msig_926 RICKMAN_HEAD_AND_NECK_CANCER_F	Genes with increased expression in R1446C vs WT	0.00233654
BCL6_repressed BCL6_repressed	Genes with increased expression in R1446C vs WT	0.00247322
HALLMARK_INTERFERON_GAMMA_RESPONSE	Genes with increased expression in R1446C vs WT	0.00268201
GC_B_cell_BLhigh_DLBCLlow GC_B_cell_BLhigh_DLBCLlow	Genes with increased expression in R1446C vs WT	0.00275404
REACTOME_MHC_CLASS_II_ANTIGEN_PRESENTATION	Genes with increased expression in R1446C vs WT	0.00307956
PID_NOTCH_PATHWAY	Genes with increased expression in R1446C vs WT	0.00315762
msig_1755 ROSS_LEUKEMIA_WITH_MLL_FUSIONS	Genes with increased expression in R1446C vs WT	0.00350671
msig_2250 BROWNE_INTERFERON_RESPONSIVE_GENES	Genes with increased expression in R1446C vs WT	0.00457464
CEACAM1 interaction with CEACAM1	Genes with increased expression in R1446C vs WT	0.00482138
GO:0045597 positive regulation of cell differentiation	Genes with increased expression in R1446C vs WT	0.00505104
msig_1064 ONDER_CDH1_SIGNALING_VIA_CTNNB1	Genes with increased expression in R1446C vs WT	0.00518548
msig_1261 TAVOR_CEBPA_TARGETS_DN	Genes with increased expression in R1446C vs WT	0.00532617
msig_2097 ZHAN_MULTIPLE_MYELOMA_CD1_VS_CD2_DN	Genes with increased expression in R1446C vs WT	0.00580488
IFN_PMBC_2x_Up	Genes with increased expression in R1446C vs WT	0.00604283
ARHGEF11 interaction with ARHGEF11	Genes with increased expression in R1446C vs WT	0.006223
msig_693 XU_AKT1_TARGETS_6HR	Genes with increased expression in R1446C vs WT	0.00628187
REACTOME_INTERFERON_ALPHA_BETA_SIGNALING Genes involved in Interferon alpha/beta signaling	Genes with increased expression in R1446C vs WT	0.0138886
msig_1552 MOSERLE_IFNA_RESPONSE	Genes with increased expression in R1446C vs WT	0.0144238
PLXNB3 interaction with PLXNB3	Genes with increased expression in R1446C vs WT	0.0148879
PID_SYNDECAN_3_PATHWAY Syndecan-3-mediated signaling events	Genes with increased expression in R1446C vs WT	0.0171562
REACTOME_CIRCADIAN_REPRESSION_OF_EXPRESSION_BY_REV_ERBA Genes involved in Circadian Repression of Expression by REV-ERBA	Genes with increased expression in R1446C vs WT	0.0304532
msig_1109 DER_IFN_ALPHA_RESPONSE_UP	Genes with increased expression in R1446C vs WT	0.0321344
REACTOME_RORA_ACTIVATES_CIRCADIAN_EXPRESSION Genes involved in RORA Activates Circadian Expression	Genes with increased expression in R1446C vs WT	0.0386414
msig_1031 NIKOLSKY_BREAST_CANCER_16P13_AMPLICON	Genes with decreased expression in R1446C vs WT	4.18076e-56
Blimp_Bcell_repressed Blimp_Bcell_repressed	Genes with decreased expression in R1446C vs WT	3.00418e-28
GC_B_cell_U133Plus GC_B_cell_U133Plus	Genes with decreased expression in R1446C vs WT	4.28247e-27
HammerichHille_siSAFB1plus2_upreg HammerichHille_siSAFB1plus2_upreg	Genes with decreased expression in R1446C vs WT	3.09559e-24
GO:0006955 immune response	Genes with decreased expression in R1446C vs WT	1.07141e-23
CD40_upregulated_Burkitt_lymphoma CD40_upregulated_Burkitt_lymphoma	Genes with decreased expression in R1446C vs WT	1.31032e-19
msig_1145 WIELAND_UP_BY_HBV_INFECTION	Genes with decreased expression in R1446C vs WT	4.67896e-19
KEGG_ALLOGRAFT_REJECTION Allograft rejection	Genes with decreased expression in R1446C vs WT	4.78463e-19
Hematopoietic_Node1658 Hematopoietic_Node1658	Genes with decreased expression in R1446C vs WT	2.72371e-18
KEGG_TYPE_I_DIABETES_MELLITUS Type I diabetes mellitus	Genes with decreased expression in R1446C vs WT	1.59669e-17
msig_998 MORI_LARGE_PRE_BII_LYMPHOCYTE_DN	Genes with decreased expression in R1446C vs WT	2.49896e-17
msig_1313 BASSO_CD40_SIGNALING_UP	Genes with decreased expression in R1446C vs WT	1.02398e-16
HALLMARK_INTERFERON_GAMMA_RESPONSE	Genes with decreased expression in R1446C vs WT	1.33751e-16
KEGG_GRAFT_VERSUS_HOST_DISEASE Graft-versus-host disease	Genes with decreased expression in R1446C vs WT	1.34309e-16
KEGG_VIRAL_MYOCARDITIS Viral myocarditis	Genes with decreased expression in R1446C vs WT	3.87356e-16
GC_B_cell_BL_equal_DLBCL GC_B_cell_BL_equal_DLBCL	Genes with decreased expression in R1446C vs WT	4.10359e-16
KEGG_CELL_ADHESION_MOLECULES_CAMS Cell adhesion molecules (CAMs)	Genes with decreased expression in R1446C vs WT	1.34772e-15
Myc_ChIP_PET_Expr_Down Myc_ChIP_PET_Expr_Down	Genes with decreased expression in R1446C vs WT	3.25452e-15
hsa04612 Antigen processing and presentation	Genes with decreased expression in R1446C vs WT	3.3247e-15
KEGG_ANTIGEN_PROCESSING_AND_PRESENTATION Antigen processing and presentation	Genes with decreased expression in R1446C vs WT	3.47085e-15
KEGG_AUTOIMMUNE_THYROID_DISEASE Autoimmune thyroid disease	Genes with decreased expression in R1446C vs WT	1.77279e-14
NFkB_all_OCILy3_Ly10 NFkB_all_OCILy3_Ly10	Genes with decreased expression in R1446C vs WT	2.84885e-14
hsa04514 Cell adhesion molecules (CAMs)	Genes with decreased expression in R1446C vs WT	2.86263e-14
IL10_OCILy3_Up IL10_OCILy3_Up	Genes with decreased expression in R1446C vs WT	4.85826e-14
KEGG_ASTHMA Asthma	Genes with decreased expression in R1446C vs WT	7.72904e-14
Figueroa_ALL_downreg_T_ALL Figueroa_ALL_downreg_T_ALL	Genes with decreased expression in R1446C vs WT	9.75162e-14
msig_1001 MORI_IMMATURE_B_LYMPHOCYTE_UP	Genes with decreased expression in R1446C vs WT	1.95756e-13
msig_1118 KLEIN_PRIMARY_EFFUSION_LYMPHOMA_DN	Genes with decreased expression in R1446C vs WT	7.76926e-13
MHC_classII_DLBCL MHC_classII_DLBCL	Genes with decreased expression in R1446C vs WT	9.40426e-13
msig_1138 FLECHNER_BIOPSY_KIDNEY_TRANSPLANT_REJECTED_VS_OK_UP	Genes with decreased expression in R1446C vs WT	1.88976e-12
msig_1407 HELLER_SILENCED_BY_METHYLATION_UP	Genes with decreased expression in R1446C vs WT	2.43823e-12
NFkB_bothOCILy3andLy10 NFkB_bothOCILy3andLy10	Genes with decreased expression in R1446C vs WT	2.64486e-12
KEGG_LEISHMANIA_INFECTION Leishmania infection	Genes with decreased expression in R1446C vs WT	5.0105e-12
KEGG_INTESTINAL_IMMUNE_NETWORK_FOR_IGA_PRODUCTION Intestinal immune network for IgA production	Genes with decreased expression in R1446C vs WT	1.09018e-11
msig_2150 MCLACHLAN_DENTAL_CARIES_UP	Genes with decreased expression in R1446C vs WT	1.38872e-11
hsa04940 Type I diabetes mellitus	Genes with decreased expression in R1446C vs WT	1.68879e-11
msig_2149 MCLACHLAN_DENTAL_CARIES_DN	Genes with decreased expression in R1446C vs WT	1.74384e-11
GC_B_cell_BLlow_DLBCLhigh GC_B_cell_BLlow_DLBCLhigh	Genes with decreased expression in R1446C vs WT	2.84838e-11
ly1.promoter.BCL6SMRT.only.93	Genes with decreased expression in R1446C vs WT	6.26914e-11
msig_1189 LU_IL4_SIGNALING	Genes with decreased expression in R1446C vs WT	7.4612e-11
CREBBP_mut_down_278_Green_FL	Genes with decreased expression in R1446C vs WT	7.6153e-11
msig_1747 RUTELLA_RESPONSE_TO_HGF_DN	Genes with decreased expression in R1446C vs WT	8.17554e-11
KEGG_SYSTEMIC_LUPUS_ERYTHEMATOSUS Systemic lupus erythematosus	Genes with decreased expression in R1446C vs WT	8.54054e-11
HammerichHille_siSAFB2_upreg HammerichHille_siSAFB2_upreg	Genes with decreased expression in R1446C vs WT	1.5146e-10
msig_1173 SANA_RESPONSE_TO_IFNG_UP	Genes with decreased expression in R1446C vs WT	1.59504e-10
msig_1003 MORI_MATURE_B_LYMPHOCYTE_UP	Genes with decreased expression in R1446C vs WT	1.93499e-10
MHC_classII_Node528 MHC_classII_Node528	Genes with decreased expression in R1446C vs WT	2.3428e-10
msig_1410 HELLER_HDAC_TARGETS_DN	Genes with decreased expression in R1446C vs WT	6.51059e-10
msig_274 ODONNELL_TARGETS_OF_MYC_AND_TFRC_UP	Genes with decreased expression in R1446C vs WT	1.07802e-09
Teater_humanDLBCL_AICDAleadingEdge Teater_humanDLBCL_AICDAleadingEdge	Genes with decreased expression in R1446C vs WT	1.31749e-09
msig_1412 HELLER_HDAC_TARGETS_SILENCED_BY_METHYLATION_DN	Genes with decreased expression in R1446C vs WT	1.61886e-09
msig_1980 HOSHIDA_LIVER_CANCER_SUBCLASS_S1	Genes with decreased expression in R1446C vs WT	1.76291e-09
Thymic_SP_CD4+Tcell_gt_Thymic_DP_Tcell Thymic_SP_CD4+Tcell_gt_Thymic_DP_Tcell	Genes with decreased expression in R1446C vs WT	1.77565e-09
msig_1757 VANTVEER_BREAST_CANCER_ESR1_DN	Genes with decreased expression in R1446C vs WT	2.59269e-09
Robles_Em_NKX2_3_upreg Robles_Em_NKX2_3_upreg	Genes with decreased expression in R1446C vs WT	4.52496e-09
Leucine_starve_up Leucine_starve_up	Genes with decreased expression in R1446C vs WT	5.24939e-09
Brown_DMSO_treated_OCI_AML2_vs_MRT199665_upreg Brown_DMSO_treated_OCI_AML2_vs_MRT199665_upreg	Genes with decreased expression in R1446C vs WT	6.00338e-09
GC_T_helper_up4x_Chtanova GC_T_helper_up4x_Chtanova	Genes with decreased expression in R1446C vs WT	6.94564e-09
KLF2_induced KLF2_induced	Genes with decreased expression in R1446C vs WT	1.23459e-08
msig_994 ZHANG_RESPONSE_TO_IKK_INHIBITOR_AND_TNF_UP	Genes with decreased expression in R1446C vs WT	1.46419e-08
REACTOME_INTERFERON_GAMMA_SIGNALING Genes involved in Interferon gamma signaling	Genes with decreased expression in R1446C vs WT	1.48074e-08
msig_1134 TARTE_PLASMA_CELL_VS_B_LYMPHOCYTE_DN	Genes with decreased expression in R1446C vs WT	1.57084e-08
msig_1006 MORI_PLASMA_CELL_DN	Genes with decreased expression in R1446C vs WT	1.61103e-08
msig_1263 HADDAD_B_LYMPHOCYTE_PROGENITOR	Genes with decreased expression in R1446C vs WT	1.80984e-08
Lymph_node_DLBCL Lymph_node_DLBCL	Genes with decreased expression in R1446C vs WT	1.98775e-08
Pan_B_U133plus Pan_B_U133plus	Genes with decreased expression in R1446C vs WT	2.15926e-08
HLA-DMA interaction with HLA-DMA	Genes with decreased expression in R1446C vs WT	3.07365e-08
Tcell_cytokine_induced_PMBConly_Iinduced Tcell_cytokine_induced_PMBConly_Iinduced	Genes with decreased expression in R1446C vs WT	3.78362e-08
Tcell_PIind4x_Feske_Fig6 Tcell_PIind4x_Feske_Fig6	Genes with decreased expression in R1446C vs WT	5.1224e-08
msig_1280 ALCALAY_AML_BY_NPM1_LOCALIZATION_DN	Genes with decreased expression in R1446C vs WT	5.52675e-08
REACTOME_CYTOKINE_SIGNALING_IN_IMMUNE_SYSTEM Genes involved in Cytokine Signaling in Immune system	Genes with decreased expression in R1446C vs WT	8.23878e-08
Quiescence_heme_cluster1 Quiescence_heme_cluster1	Genes with decreased expression in R1446C vs WT	9.09386e-08
msig_1271 BASSO_CD40_SIGNALING_DN	Genes with decreased expression in R1446C vs WT	9.53913e-08
Tcell_PIrep_CalciumDefPtup4x_Feske_Fig6 Tcell_PIrep_CalciumDefPtup4x_Feske_Fig6	Genes with decreased expression in R1446C vs WT	1.08363e-07
msig_1569 GAURNIER_PSMD4_TARGETS	Genes with decreased expression in R1446C vs WT	1.37885e-07
msig_792 TSAI_RESPONSE_TO_IONIZING_RADIATION	Genes with decreased expression in R1446C vs WT	1.38797e-07
GO:0010627 regulation of protein kinase cascade	Genes with decreased expression in R1446C vs WT	1.99291e-07
msig_1722 LINDSTEDT_DENDRITIC_CELL_MATURATION_D	Genes with decreased expression in R1446C vs WT	2.07865e-07
msig_1790 LEE_DIFFERENTIATING_T_LYMPHOCYTE	Genes with decreased expression in R1446C vs WT	2.31308e-07
Li_cluster1_vs_cluster3_downreg Li_cluster1_vs_cluster3_downreg	Genes with decreased expression in R1446C vs WT	2.9945e-07
msig_426 MARKEY_RB1_ACUTE_LOF_UP	Genes with decreased expression in R1446C vs WT	3.22171e-07
Tcell_PIind4x_Feske_Fig4 Tcell_PIind4x_Feske_Fig4	Genes with decreased expression in R1446C vs WT	3.49041e-07
IFN_PMBC_2x_Up IFN_PMBC_2x_Up	Genes with decreased expression in R1446C vs WT	3.62097e-07
msig_1303 VERHAAK_AML_WITH_NPM1_MUTATED_DN	Genes with decreased expression in R1446C vs WT	4.06117e-07
GO:0006952 defense response	Genes with decreased expression in R1446C vs WT	5.3229e-07
KEGG_HEMATOPOIETIC_CELL_LINEAGE Hematopoietic cell lineage	Genes with decreased expression in R1446C vs WT	6.29722e-07
Ci_GCB_vs_NBC_BCL6_targets_repressed_ Ci_GCB_vs_NBC_BCL6_targets_repressed_	Genes with decreased expression in R1446C vs WT	9.58515e-07
HLA-F interaction with HLA-F	Genes with decreased expression in R1446C vs WT	9.80112e-07
MHC_classII_DLBCL_survival MHC_classII_DLBCL_survival	Genes with decreased expression in R1446C vs WT	9.80112e-07
Dendritic_cell_CD123pos_blood Dendritic_cell_CD123pos_blood	Genes with decreased expression in R1446C vs WT	9.97916e-07
Ci_GCB_vs_NBC_BCL6_targets Ci_GCB_vs_NBC_BCL6_targets	Genes with decreased expression in R1446C vs WT	1.03167e-06
CD40_downregulated_Burkitt_lymphoma CD40_downregulated_Burkitt_lymphoma	Genes with decreased expression in R1446C vs WT	1.07833e-06
msig_36 BERTUCCI_MEDULLARY_VS_DUCTAL_BREAST_CANCER_UP	Genes with decreased expression in R1446C vs WT	1.15964e-06
hsa04640 Hematopoietic cell lineage	Genes with decreased expression in R1446C vs WT	1.2314e-06
msig_253 TONKS_TARGETS_OF_RUNX1_RUNX1T1_FUSION_HSC_DN	Genes with decreased expression in R1446C vs WT	1.31466e-06
msig_1773 HOFFMANN_SMALL_PRE_BII_TO_IMMATURE_B_LYMPHOCYTE_UP	Genes with decreased expression in R1446C vs WT	1.3314e-06
Germinal_center_Bcell_DLBCL Germinal_center_Bcell_DLBCL	Genes with decreased expression in R1446C vs WT	1.3314e-06
Fiskus_CLL_AFtreatment_downreg Fiskus_CLL_AFtreatment_downreg	Genes with decreased expression in R1446C vs WT	1.36615e-06
IFN_PMBC_4x_Up IFN_PMBC_4x_Up	Genes with decreased expression in R1446C vs WT	1.42499e-06
ST_TUMOR_NECROSIS_FACTOR_PATHWAY Tumor Necrosis Factor Pathway.	Genes with decreased expression in R1446C vs WT	1.6686e-06
msig_1074 ROSS_ACUTE_MYELOID_LEUKEMIA_CBF	Genes with decreased expression in R1446C vs WT	1.8951e-06
GO:0046649 lymphocyte activation	Genes with decreased expression in R1446C vs WT	2.09407e-06
B2M interaction with B2M	Genes with decreased expression in R1446C vs WT	2.32691e-06
GO:0042110 T cell activation	Genes with decreased expression in R1446C vs WT	2.39208e-06
Dendritic_cell_CD16pos_blood Dendritic_cell_CD16pos_blood	Genes with decreased expression in R1446C vs WT	2.65761e-06
ly1.promoter.BCL6.alone.906	Genes with decreased expression in R1446C vs WT	2.91735e-06
msig_1155 BROCKE_APOPTOSIS_REVERSED_BY_IL6	Genes with decreased expression in R1446C vs WT	3.40643e-06
h_blymphocytePathway B Lymphocyte Cell Surface Molecules	Genes with decreased expression in R1446C vs WT	3.48446e-06
h_bbcellPathway Bystander B Cell Activation	Genes with decreased expression in R1446C vs WT	3.48446e-06
REACTOME_INTERFERON_SIGNALING Genes involved in Interferon Signaling	Genes with decreased expression in R1446C vs WT	3.8479e-06
GO:0010647 positive regulation of cell communication	Genes with decreased expression in R1446C vs WT	4.11023e-06
GO:0010740 positive regulation of protein kinase cascade	Genes with decreased expression in R1446C vs WT	4.19461e-06
msig_141 DOANE_RESPONSE_TO_ANDROGEN_DN	Genes with decreased expression in R1446C vs WT	4.24531e-06
msig_645 LUI_THYROID_CANCER_CLUSTER_4	Genes with decreased expression in R1446C vs WT	4.74438e-06
GO:0045321 leukocyte activation	Genes with decreased expression in R1446C vs WT	4.97881e-06
msig_1269 VERHAAK_AML_WITH_NPM1_MUTATED_UP	Genes with decreased expression in R1446C vs WT	5.68795e-06
msig_996 MORI_PRE_BI_LYMPHOCYTE_DN	Genes with decreased expression in R1446C vs WT	5.69027e-06
Resting_blood_B_cell_GNF Resting_blood_B_cell_GNF	Genes with decreased expression in R1446C vs WT	5.69027e-06
BIOCARTA_BLYMPHOCYTE_PATHWAY B Lymphocyte Cell Surface Molecules	Genes with decreased expression in R1446C vs WT	6.78758e-06
msig_1731 PARK_TRETINOIN_RESPONSE	Genes with decreased expression in R1446C vs WT	6.78758e-06
Tcell_PIind_CalciumDefPtdown4x_Feske_Fig6 Tcell_PIind_CalciumDefPtdown4x_Feske_Fig6	Genes with decreased expression in R1446C vs WT	7.45244e-06
msig_1812 SHAFFER_IRF4_TARGETS_IN_ACTIVATED_DENDRITIC_CELL	Genes with decreased expression in R1446C vs WT	8.7524e-06
msig_472 MISSIAGLIA_REGULATED_BY_METHYLATION_UP	Genes with decreased expression in R1446C vs WT	8.83958e-06
msig_309 KIM_WT1_TARGETS_UP	Genes with decreased expression in R1446C vs WT	9.30203e-06
Glutamine_starve_up Glutamine_starve_up	Genes with decreased expression in R1446C vs WT	1.01845e-05
Tcell_cytokine_repressed Tcell_cytokine_repressed	Genes with decreased expression in R1446C vs WT	1.03938e-05
msig_478 WANG_ESOPHAGUS_CANCER_VS_NORMAL_UP	Genes with decreased expression in R1446C vs WT	1.17238e-05
HIF1alpha_1.5x_Up HIF1alpha_1.5x_Up	Genes with decreased expression in R1446C vs WT	1.18502e-05
GO:0001775 cell activation	Genes with decreased expression in R1446C vs WT	1.22755e-05
GO:0012501 programmed cell death	Genes with decreased expression in R1446C vs WT	1.37136e-05
CD74 interaction with CD74	Genes with decreased expression in R1446C vs WT	1.39736e-05
GO:0009966 regulation of signal transduction	Genes with decreased expression in R1446C vs WT	1.39795e-05
msig_1576 WILENSKY_RESPONSE_TO_DARAPLADIB	Genes with decreased expression in R1446C vs WT	1.53953e-05
GO:0010646 regulation of cell communication	Genes with decreased expression in R1446C vs WT	1.77533e-05
msig_1260 LENAOUR_DENDRITIC_CELL_MATURATION_UP	Genes with decreased expression in R1446C vs WT	1.79444e-05
msig_496 DUNNE_TARGETS_OF_AML1_MTG8_FUSION_DN	Genes with decreased expression in R1446C vs WT	1.83665e-05
Saba_nonCanonicalNFkBsignalingPathway_mutated Saba_nonCanonicalNFkBsignalingPathway_mutated	Genes with decreased expression in R1446C vs WT	2.02378e-05
Figueroa_ALL_upreg_ETV6 Figueroa_ALL_upreg_ETV6	Genes with decreased expression in R1446C vs WT	2.02569e-05
msig_1167 FERNANDEZ_BOUND_BY_MYC	Genes with decreased expression in R1446C vs WT	2.25835e-05
msig_331 GRAHAM_CML_QUIESCENT_VS_NORMAL_QUIESCENT_DN	Genes with decreased expression in R1446C vs WT	2.30511e-05
msig_2097 ZHAN_MULTIPLE_MYELOMA_CD1_VS_CD2_DN	Genes with decreased expression in R1446C vs WT	2.30511e-05
STAT3high_ABC_DLBCL_subgroup STAT3high_ABC_DLBCL_subgroup	Genes with decreased expression in R1446C vs WT	2.54251e-05
KEGG_NATURAL_KILLER_CELL_MEDIATED_CYTOTOXICITY Natural killer cell mediated cytotoxicity	Genes with decreased expression in R1446C vs WT	2.6437e-05
Blood_CD4+Tcell_gt_thymic_SP_CD4+Tcell Blood_CD4+Tcell_gt_thymic_SP_CD4+Tcell	Genes with decreased expression in R1446C vs WT	2.72149e-05
REACTOME_MHC_CLASS_II_ANTIGEN_PRESENTATION Genes involved in MHC class II antigen presentation	Genes with decreased expression in R1446C vs WT	2.84592e-05
Robles_Em_NKX2_3_downreg Robles_Em_NKX2_3_downreg	Genes with decreased expression in R1446C vs WT	2.87121e-05
STAT3_up_OCILy10 STAT3_up_OCILy10	Genes with decreased expression in R1446C vs WT	2.95497e-05
FCER2 interaction with FCER2	Genes with decreased expression in R1446C vs WT	3.12119e-05
MHC_classI_Node591 MHC_classI_Node591	Genes with decreased expression in R1446C vs WT	3.17888e-05
msig_5 WINTER_HYPOXIA_DN	Genes with decreased expression in R1446C vs WT	3.19992e-05
h_asbcellPathway Antigen Dependent B Cell Activation	Genes with decreased expression in R1446C vs WT	3.20327e-05
BIOCARTA_IL2RB_PATHWAY IL-2 Receptor Beta Chain in T cell Activation	Genes with decreased expression in R1446C vs WT	3.25029e-05
Quiescence_heme_all Quiescence_heme_all	Genes with decreased expression in R1446C vs WT	3.37687e-05
msig_701 DIRMEIER_LMP1_RESPONSE_EARLY	Genes with decreased expression in R1446C vs WT	3.74769e-05
msig_374 COLDREN_GEFITINIB_RESISTANCE_DN	Genes with decreased expression in R1446C vs WT	4.19274e-05
REACTOME_COSTIMULATION_BY_THE_CD28_FAMILY Genes involved in Costimulation by the CD28 family	Genes with decreased expression in R1446C vs WT	4.2899e-05
REACTOME_IMMUNOREGULATORY_INTERACTIONS_BETWEEN_A_LYMPHOID_AND_A_NON_LYMPHOID_CELL Genes involved in Immunoregulatory interactions between a Lymphoid and a non-Lymphoid cell	Genes with decreased expression in R1446C vs WT	5.08634e-05
msig_1784 LEE_EARLY_T_LYMPHOCYTE_DN	Genes with decreased expression in R1446C vs WT	6.09355e-05
h_mhcPathway Antigen Processing and Presentation	Genes with decreased expression in R1446C vs WT	6.19876e-05
SA_FAS_SIGNALING The TNF-type receptor Fas induces apoptosis on ligand binding.	Genes with decreased expression in R1446C vs WT	6.19876e-05
GCB_gt_ABC_LC GCB_gt_ABC_LC	Genes with decreased expression in R1446C vs WT	6.19876e-05
msig_1194 MANALO_HYPOXIA_UP	Genes with decreased expression in R1446C vs WT	6.35794e-05
msig_287 HUMMEL_BURKITTS_LYMPHOMA_DN	Genes with decreased expression in R1446C vs WT	7.09164e-05
JAK2 interaction with JAK2	Genes with decreased expression in R1446C vs WT	7.20817e-05
msig_194 OSWALD_HEMATOPOIETIC_STEM_CELL_IN_COLLAGEN_GEL_UP	Genes with decreased expression in R1446C vs WT	7.62701e-05
msig_195 OSWALD_HEMATOPOIETIC_STEM_CELL_IN_COLLAGEN_GEL_DN	Genes with decreased expression in R1446C vs WT	7.62701e-05
Tcell_PIind_CalciumDefPtdown4x_Feske_Fig4 Tcell_PIind_CalciumDefPtdown4x_Feske_Fig4	Genes with decreased expression in R1446C vs WT	7.8266e-05
h_il2rbPathway IL-2 Receptor Beta Chain in T cell Activation	Genes with decreased expression in R1446C vs WT	7.96284e-05
GO:0043122 regulation of I-kappaB kinase/NF-kappaB cascade	Genes with decreased expression in R1446C vs WT	8.08765e-05
REACTOME_TCR_SIGNALING Genes involved in TCR signaling	Genes with decreased expression in R1446C vs WT	8.48687e-05
REACTOME_RIG_I_MDA5_MEDIATED_INDUCTION_OF_IFN_ALPHA_BETA_PATHWAYS Genes involved in RIG-I/MDA5 mediated induction of IFN-alpha/beta pathways	Genes with decreased expression in R1446C vs WT	8.9801e-05
GO:0043123 positive regulation of I-kappaB kinase/NF-kappaB cascade	Genes with decreased expression in R1446C vs WT	8.99851e-05
hsa04650 Natural killer cell mediated cytotoxicity	Genes with decreased expression in R1446C vs WT	9.43625e-05
Figueroa_ALL_upreg_MLL_r Figueroa_ALL_upreg_MLL_r	Genes with decreased expression in R1446C vs WT	9.43625e-05
NFKB_K1106 NFKB_K1106	Genes with decreased expression in R1446C vs WT	0.000100479
KEGG_B_CELL_RECEPTOR_SIGNALING_PATHWAY B cell receptor signaling pathway	Genes with decreased expression in R1446C vs WT	0.000106067
msig_278 SENESE_HDAC1_AND_HDAC2_TARGETS_UP	Genes with decreased expression in R1446C vs WT	0.000107225
HLA-G interaction with HLA-G	Genes with decreased expression in R1446C vs WT	0.00010879
LTA interaction with LTA	Genes with decreased expression in R1446C vs WT	0.00010879
IRF3_target_gene IRF3_target_gene	Genes with decreased expression in R1446C vs WT	0.000128926
hsa04662 B cell receptor signaling pathway	Genes with decreased expression in R1446C vs WT	0.000129075
JAK_IL10_Ly10_Up JAK_IL10_Ly10_Up	Genes with decreased expression in R1446C vs WT	0.000135694
KEGG_FC_GAMMA_R_MEDIATED_PHAGOCYTOSIS Fc gamma R-mediated phagocytosis	Genes with decreased expression in R1446C vs WT	0.000135714
PID_CXCR4_PATHWAY CXCR4-mediated signaling events	Genes with decreased expression in R1446C vs WT	0.000148808
Teater_VavPBcl2_AICDAleadingEdge Teater_VavPBcl2_AICDAleadingEdge	Genes with decreased expression in R1446C vs WT	0.000149826
PID_IL4_2PATHWAY IL4-mediated signaling events	Genes with decreased expression in R1446C vs WT	0.000151215
msig_2250 BROWNE_INTERFERON_RESPONSIVE_GENES	Genes with decreased expression in R1446C vs WT	0.000151215
msig_63 GAZDA_DIAMOND_BLACKFAN_ANEMIA_PROGENITOR_UP	Genes with decreased expression in R1446C vs WT	0.000161849
GO:0043069 negative regulation of programmed cell death	Genes with decreased expression in R1446C vs WT	0.000170378
msig_585 GILMORE_CORE_NFKB_PATHWAY	Genes with decreased expression in R1446C vs WT	0.000176792
msig_1733 PARK_TRETINOIN_RESPONSE_AND_RARA_PLZF_FUSION	Genes with decreased expression in R1446C vs WT	0.000187027
msig_1349 KIM_LRRC3B_TARGETS	Genes with decreased expression in R1446C vs WT	0.00020017
msig_258 TONKS_TARGETS_OF_RUNX1_RUNX1T1_FUSION_ERYTHROCYTE_UP	Genes with decreased expression in R1446C vs WT	0.000209762
Tcell_PIind_CsAdown4x Tcell_PIind_CsAdown4x	Genes with decreased expression in R1446C vs WT	0.000217449
Vu_upreg_Syncrip_shRNA_Log2Foldchange Vu_upreg_Syncrip_shRNA_Log2Foldchange	Genes with decreased expression in R1446C vs WT	0.000220274
msig_2194 MARTINEZ_RESPONSE_TO_TRABECTEDIN	Genes with decreased expression in R1446C vs WT	0.000226382
Dendritic_cell_BDCA3pos_blood Dendritic_cell_BDCA3pos_blood	Genes with decreased expression in R1446C vs WT	0.000244265
ABC_gt_GCB_Affy ABC_gt_GCB_Affy	Genes with decreased expression in R1446C vs WT	0.000247263
Myeloma_CD-2_subgroup_up Myeloma_CD-2_subgroup_up	Genes with decreased expression in R1446C vs WT	0.000265639
msig_1109 DER_IFN_ALPHA_RESPONSE_UP	Genes with decreased expression in R1446C vs WT	0.000271149
GO:0051093 negative regulation of developmental process	Genes with decreased expression in R1446C vs WT	0.000272554
msig_2391 YU_MYC_TARGETS_DN	Genes with decreased expression in R1446C vs WT	0.000273767
msig_1670 BEIER_GLIOMA_STEM_CELL_DN	Genes with decreased expression in R1446C vs WT	0.000273767
msig_337 GRAHAM_CML_DIVIDING_VS_NORMAL_QUIESCENT_DN	Genes with decreased expression in R1446C vs WT	0.000288024
SNAPC5 interaction with SNAPC5	Genes with decreased expression in R1446C vs WT	0.000297601
SIG_CD40PATHWAYMAP Genes related to CD40 signaling	Genes with decreased expression in R1446C vs WT	0.000299007
msig_1218 ROSS_AML_WITH_AML1_ETO_FUSION	Genes with decreased expression in R1446C vs WT	0.000307453
msig_28 HOLLMAN_APOPTOSIS_VIA_CD40_UP	Genes with decreased expression in R1446C vs WT	0.00032058
Figueroa_ALL_upreg_HyperB Figueroa_ALL_upreg_HyperB	Genes with decreased expression in R1446C vs WT	0.000338771
msig_1635 HUANG_DASATINIB_RESISTANCE_UP	Genes with decreased expression in R1446C vs WT	0.000341654
msig_1174 SANA_TNF_SIGNALING_UP	Genes with decreased expression in R1446C vs WT	0.000341654
msig_1721 LINDSTEDT_DENDRITIC_CELL_MATURATION_C	Genes with decreased expression in R1446C vs WT	0.000350275
GO:0048534 hemopoietic or lymphoid organ development	Genes with decreased expression in R1446C vs WT	0.000352684
REACTOME_NEGATIVE_REGULATORS_OF_RIG_I_MDA5_SIGNALING Genes involved in Negative regulators of RIG-I/MDA5 signaling	Genes with decreased expression in R1446C vs WT	0.000360965
BIOCARTA_ASBCELL_PATHWAY Antigen Dependent B Cell Activation	Genes with decreased expression in R1446C vs WT	0.000396216
Thymic_DP_Tcell_gt_Thymic_SP_CD4+Tcell Thymic_DP_Tcell_gt_Thymic_SP_CD4+Tcell	Genes with decreased expression in R1446C vs WT	0.000409421
Tcell_PIrep_CsAup4x Tcell_PIrep_CsAup4x	Genes with decreased expression in R1446C vs WT	0.00041066
REACTOME_CLASS_I_MHC_MEDIATED_ANTIGEN_PROCESSING_PRESENTATION	Genes with decreased expression in R1446C vs WT	0.000411795
msig_269 DITTMER_PTHLH_TARGETS_DN	Genes with decreased expression in R1446C vs WT	0.000422864
msig_1562 IZADPANAH_STEM_CELL_ADIPOSE_VS_BONE_UP	Genes with decreased expression in R1446C vs WT	0.000447829
msig_2100 ZHAN_MULTIPLE_MYELOMA_CD1_AND_CD2_UP	Genes with decreased expression in R1446C vs WT	0.000449096
GO:0002520 immune system development	Genes with decreased expression in R1446C vs WT	0.000451169
Tcell_PIrep4x_Feske_Fig6 Tcell_PIrep4x_Feske_Fig6	Genes with decreased expression in R1446C vs WT	0.000503327
msig_1068 ROZANOV_MMP14_TARGETS_UP	Genes with decreased expression in R1446C vs WT	0.000525058
h_th1th2Pathway Th1/Th2 Differentiation	Genes with decreased expression in R1446C vs WT	0.000558075
Polo_iPSC_cluster9 Polo_iPSC_cluster9	Genes with decreased expression in R1446C vs WT	0.00056233
GO:0043066 negative regulation of apoptosis	Genes with decreased expression in R1446C vs WT	0.000581746
msig_306 NAGASHIMA_NRG1_SIGNALING_UP	Genes with decreased expression in R1446C vs WT	0.000606589
msig_495 DUNNE_TARGETS_OF_AML1_MTG8_FUSION_UP	Genes with decreased expression in R1446C vs WT	0.000631019
msig_729 DIRMEIER_LMP1_RESPONSE_LATE_UP	Genes with decreased expression in R1446C vs WT	0.000631019
REACTOME_ER_PHAGOSOME_PATHWAY Genes involved in ER-Phagosome pathway	Genes with decreased expression in R1446C vs WT	0.000632547
KEGG_PHOSPHATIDYLINOSITOL_SIGNALING_SYSTEM Phosphatidylinositol signaling system	Genes with decreased expression in R1446C vs WT	0.000633114
Tcell_PIrep4x_Feske_Fig4 Tcell_PIrep4x_Feske_Fig4	Genes with decreased expression in R1446C vs WT	0.000644516
Wilkinson_K562_SEM_RUNX1_targets Wilkinson_K562_SEM_RUNX1_targets	Genes with decreased expression in R1446C vs WT	0.000678792
KEGG_PRIMARY_IMMUNODEFICIENCY Primary immunodeficiency	Genes with decreased expression in R1446C vs WT	0.000715002
LYN interaction with LYN	Genes with decreased expression in R1446C vs WT	0.00071893
BIOCARTA_GRANULOCYTES_PATHWAY Adhesion and Diapedesis of Granulocytes	Genes with decreased expression in R1446C vs WT	0.00076189
msig_349 WATANABE_ULCERATIVE_COLITIS_WITH_CANCER_DN	Genes with decreased expression in R1446C vs WT	0.00076189
GO:0042035 regulation of cytokine biosynthetic process	Genes with decreased expression in R1446C vs WT	0.000787281
IL6_Ly10_Up_group1 IL6_Ly10_Up_group1	Genes with decreased expression in R1446C vs WT	0.000793171
Tcell_PIrep_CalciumDefPtup4x_Feske_Fig4 Tcell_PIrep_CalciumDefPtup4x_Feske_Fig4	Genes with decreased expression in R1446C vs WT	0.000793171
msig_1262 LENAOUR_DENDRITIC_CELL_MATURATION_DN	Genes with decreased expression in R1446C vs WT	0.000825881
msig_596 RASHI_RESPONSE_TO_IONIZING_RADIATION_2	Genes with decreased expression in R1446C vs WT	0.000853603
msig_1749 RUTELLA_RESPONSE_TO_HGF_VS_CSF2RB_AND_IL4_DN	Genes with decreased expression in R1446C vs WT	0.000916397
msig_1820 ZHAN_EARLY_DIFFERENTIATION_GENES_DN	Genes with decreased expression in R1446C vs WT	0.000970812
IL6_Ly10_Up_all IL6_Ly10_Up_all	Genes with decreased expression in R1446C vs WT	0.000970812
PID_BCR_5PATHWAY	Genes with decreased expression in R1446C vs WT	0.000971051
ICAM1 interaction with ICAM1	Genes with decreased expression in R1446C vs WT	0.000993309
msig_238 RHEIN_ALL_GLUCOCORTICOID_THERAPY_UP	Genes with decreased expression in R1446C vs WT	0.00100873
h_ctlPathway CTL mediated immune response against target cells	Genes with decreased expression in R1446C vs WT	0.00101315
BIOCARTA_CTL_PATHWAY CTL mediated immune response against target cells	Genes with decreased expression in R1446C vs WT	0.00101315
Tcell_PIind4x_CsAindependent Tcell_PIind4x_CsAindependent	Genes with decreased expression in R1446C vs WT	0.00101315
p53_up_Xray p53_up_Xray	Genes with decreased expression in R1446C vs WT	0.00101315
msig_232 HOEBEKE_LYMPHOID_STEM_CELL_UP	Genes with decreased expression in R1446C vs WT	0.00105228
msig_787 KIM_MYC_AMPLIFICATION_TARGETS_DN	Genes with decreased expression in R1446C vs WT	0.001075
Figueroa_ALL_downreg_MLL_r Figueroa_ALL_downreg_MLL_r	Genes with decreased expression in R1446C vs WT	0.0011718
msig_1339 DOUGLAS_BMI1_TARGETS_DN	Genes with decreased expression in R1446C vs WT	0.00118388
REACTOME_CELL_SURFACE_INTERACTIONS_AT_THE_VASCULAR_WALL Genes involved in Cell surface interactions at the vascular wall	Genes with decreased expression in R1446C vs WT	0.00120218
Figueroa_ALL_downreg_ERG_r Figueroa_ALL_downreg_ERG_r	Genes with decreased expression in R1446C vs WT	0.00129169
Myeloma_LB_subgroup_down Myeloma_LB_subgroup_down	Genes with decreased expression in R1446C vs WT	0.00129169
Thymic_SP_CD4+Tcell_gt_Blood_CD4+Tcell Thymic_SP_CD4+Tcell_gt_Blood_CD4+Tcell	Genes with decreased expression in R1446C vs WT	0.00130954
NFkB_OCILy10_only NFkB_OCILy10_only	Genes with decreased expression in R1446C vs WT	0.00131738
GO:0030097 hemopoiesis	Genes with decreased expression in R1446C vs WT	0.00136934
Resting_dendritic_cell_GNF Resting_dendritic_cell_GNF	Genes with decreased expression in R1446C vs WT	0.0014245
msig_266 PAPASPYRIDONOS_UNSTABLE_ATEROSCLEROTIC_PLAQUE_UP	Genes with decreased expression in R1446C vs WT	0.0014693
GO:0008277 regulation of G-protein coupled receptor protein signaling pathway	Genes with decreased expression in R1446C vs WT	0.00147968
msig_1680 BOYLAN_MULTIPLE_MYELOMA_D_DN	Genes with decreased expression in R1446C vs WT	0.00154744
GO:0006285 base-excision repair, AP site formation	Genes with decreased expression in R1446C vs WT	0.0015521
BAG1 interaction with BAG1	Genes with decreased expression in R1446C vs WT	0.0015521
GO:0051707 response to other organism	Genes with decreased expression in R1446C vs WT	0.00159623
msig_360 HAHTOLA_SEZARY_SYNDROM_UP	Genes with decreased expression in R1446C vs WT	0.00165764
msig_2167 BROWNE_HCMV_INFECTION_14HR_DN	Genes with decreased expression in R1446C vs WT	0.00179004
msig_1333 BILD_MYC_ONCOGENIC_SIGNATURE	Genes with decreased expression in R1446C vs WT	0.00194218
CD8_T_effectorUp_memoryUp_NaiveDn CD8_T_effectorUp_memoryUp_NaiveDn	Genes with decreased expression in R1446C vs WT	0.00194584
Figueroa_ALL_downreg_TCF3 Figueroa_ALL_downreg_TCF3	Genes with decreased expression in R1446C vs WT	0.00210664
BIOCARTA_TH1TH2_PATHWAY Th1/Th2 Differentiation	Genes with decreased expression in R1446C vs WT	0.00210664
GO:0042108 positive regulation of cytokine biosynthetic process	Genes with decreased expression in R1446C vs WT	0.00216987
msig_1466 OSADA_ASCL1_TARGETS_UP	Genes with decreased expression in R1446C vs WT	0.00216987
REACTOME_ENDOSOMAL_VACUOLAR_PATHWAY Genes involved in Endosomal/Vacuolar pathway	Genes with decreased expression in R1446C vs WT	0.00227376
TGFbeta_down_epithelial_small TGFbeta_down_epithelial_small	Genes with decreased expression in R1446C vs WT	0.00227376
REACTOME_DOWNSTREAM_TCR_SIGNALING Genes involved in Downstream TCR signaling	Genes with decreased expression in R1446C vs WT	0.00227521
GC_B_cell_BLhigh_DLBCLlow GC_B_cell_BLhigh_DLBCLlow	Genes with decreased expression in R1446C vs WT	0.00227521
GO:0002521 leukocyte differentiation	Genes with decreased expression in R1446C vs WT	0.00229596
GO:0009607 response to biotic stimulus	Genes with decreased expression in R1446C vs WT	0.00242253
PTK2 interaction with PTK2	Genes with decreased expression in R1446C vs WT	0.0024466
PID_PI3KCIPATHWAY Class I PI3K signaling events	Genes with decreased expression in R1446C vs WT	0.0024466
PID_ALPHASYNUCLEIN_PATHWAY Alpha-synuclein signaling	Genes with decreased expression in R1446C vs WT	0.00264333
msig_587 DUTTA_APOPTOSIS_VIA_NFKB	Genes with decreased expression in R1446C vs WT	0.00264333
msig_1856 VALK_AML_CLUSTER_13	Genes with decreased expression in R1446C vs WT	0.00264333
REACTOME_INTERFERON_ALPHA_BETA_SIGNALING Genes involved in Interferon alpha/beta signaling	Genes with decreased expression in R1446C vs WT	0.0027239
GO:0016310 phosphorylation	Genes with decreased expression in R1446C vs WT	0.00288172
GO:0009155 purine deoxyribonucleotide catabolic process	Genes with decreased expression in R1446C vs WT	0.00291547
GO:0045007 depurination	Genes with decreased expression in R1446C vs WT	0.00291547
GC_B_DLBCL_survival GC_B_DLBCL_survival	Genes with decreased expression in R1446C vs WT	0.00291547
GO:0009264 deoxyribonucleotide catabolic process	Genes with decreased expression in R1446C vs WT	0.00317246
REACTOME_GENERATION_OF_SECOND_MESSENGER_MOLECULES Genes involved in Generation of second messenger molecules	Genes with decreased expression in R1446C vs WT	0.0031728
msig_1284 NGUYEN_NOTCH1_TARGETS_DN	Genes with decreased expression in R1446C vs WT	0.00328626
msig_1674 DAVIES_MULTIPLE_MYELOMA_VS_MGUS_DN	Genes with decreased expression in R1446C vs WT	0.00382272
GO:0030099 myeloid cell differentiation	Genes with decreased expression in R1446C vs WT	0.00393308
REACTOME_PD1_SIGNALING Genes involved in PD-1 signaling	Genes with decreased expression in R1446C vs WT	0.00426055
GO:0042990 regulation of transcription factor import into nucleus	Genes with decreased expression in R1446C vs WT	0.00538087
REACTOME_EXTRINSIC_PATHWAY_FOR_APOPTOSIS Genes involved in Extrinsic Pathway for Apoptosis	Genes with decreased expression in R1446C vs WT	0.00554866
msig_335 GRAHAM_CML_DIVIDING_VS_NORMAL_DIVIDING_DN	Genes with decreased expression in R1446C vs WT	0.00554866
msig_1711 CHAUHAN_RESPONSE_TO_METHOXYESTRADIOL_DN	Genes with decreased expression in R1446C vs WT	0.00561974
SEMA6A interaction with SEMA6A	Genes with decreased expression in R1446C vs WT	0.00570903
msig_1214 FLECHNER_PBL_KIDNEY_TRANSPLANT_REJECTED_VS_OK_UP	Genes with decreased expression in R1446C vs WT	0.00597064
msig_1221 DER_IFN_GAMMA_RESPONSE_UP	Genes with decreased expression in R1446C vs WT	0.00626976
FAS interaction with FAS	Genes with decreased expression in R1446C vs WT	0.00629841
msig_1628 BREDEMEYER_RAG_SIGNALING_VIA_ATM_NOT_VIA_NFKB_UP	Genes with decreased expression in R1446C vs WT	0.00686982
GO:0055086 nucleobase, nucleoside and nucleotide metabolic process	Genes with decreased expression in R1446C vs WT	0.00699378
GO:0006195 purine nucleotide catabolic process	Genes with decreased expression in R1446C vs WT	0.00704583
RIPK1 interaction with RIPK1	Genes with decreased expression in R1446C vs WT	0.00704583
GO:0042306 regulation of protein import into nucleus	Genes with decreased expression in R1446C vs WT	0.00731411
msig_1697 BOHN_PRIMARY_IMMUNODEFICIENCY_SYNDROM_DN	Genes with decreased expression in R1446C vs WT	0.00731411
GO:0032386 regulation of intracellular transport	Genes with decreased expression in R1446C vs WT	0.00811498
GO:0006468 protein amino acid phosphorylation	Genes with decreased expression in R1446C vs WT	0.00823616
GO:0002573 myeloid leukocyte differentiation	Genes with decreased expression in R1446C vs WT	0.00843209
REACTOME_SIGNALING_BY_SCF_KIT Genes involved in Signaling by SCF-KIT	Genes with decreased expression in R1446C vs WT	0.0122854
msig_1095 FERRANDO_TAL1_NEIGHBORS	Genes with decreased expression in R1446C vs WT	0.0128606
GO:0033157 regulation of intracellular protein transport	Genes with decreased expression in R1446C vs WT	0.0140006
REACTOME_ANTIGEN_PRESENTATION_FOLDING_ASSEMBLY_AND_PEPTIDE_LOADING_OF_CLASS_I_MHC Genes involved in Antigen Presentation: Folding, assembly and peptide loading of class I MHC	Genes with decreased expression in R1446C vs WT	0.0152564
BIOCARTA_IL7_PATHWAY IL-7 Signal Transduction	Genes with decreased expression in R1446C vs WT	0.0152564
GO:0006163 purine nucleotide metabolic process	Genes with decreased expression in R1446C vs WT	0.018874
GO:0006753 nucleoside phosphate metabolic process	Genes with decreased expression in R1446C vs WT	0.0197395
GO:0009117 nucleotide metabolic process	Genes with decreased expression in R1446C vs WT	0.0197395
GO:0009166 nucleotide catabolic process	Genes with decreased expression in R1446C vs WT	0.0214708
REACTOME_TRANSLOCATION_OF_ZAP_70_TO_IMMUNOLOGICAL_SYNAPSE Genes involved in Translocation of ZAP-70 to Immunological synapse	Genes with decreased expression in R1446C vs WT	0.024497
msig_1996 GUTIERREZ_MULTIPLE_MYELOMA_UP	Genes with decreased expression in R1446C vs WT	0.024497
msig_1550 GALI_TP53_TARGETS_APOPTOTIC_UP	Genes with decreased expression in R1446C vs WT	0.024497
GO:0001817 regulation of cytokine production	Genes with decreased expression in R1446C vs WT	0.0254581
msig_1715 ICHIBA_GRAFT_VERSUS_HOST_DISEASE_D7_UP	Genes with decreased expression in R1446C vs WT	0.0262508
msig_2027 TIAN_TNF_SIGNALING_VIA_NFKB	Genes with decreased expression in R1446C vs WT	0.027193
h_il5Pathway IL 5 Signaling Pathway	Genes with decreased expression in R1446C vs WT	0.0308465
REACTOME_PHOSPHORYLATION_OF_CD3_AND_TCR_ZETA_CHAINS Genes involved in Phosphorylation of CD3 and TCR zeta chains	Genes with decreased expression in R1446C vs WT	0.0308465
msig_971 AMIT_EGF_RESPONSE_60_MCF10A	Genes with decreased expression in R1446C vs WT	0.0309851
msig_1707 SEKI_INFLAMMATORY_RESPONSE_LPS_UP	Genes with decreased expression in R1446C vs WT	0.0345649
KEGG_CYTOKINE_CYTOKINE_RECEPTOR_INTERACTION	Genes with decreased expression in R1446C vs WT	0.0445098
msig_2106 ZHAN_MULTIPLE_MYELOMA_CD2_UP	Genes with decreased expression in R1446C vs WT	0.045866

## Sheet: Table S5
Table S5: Comparison of clinical factors between CREBBP LOP and KAT mutation groups
	WT	LOP	KAT	LOP vs KAT Fisher P-value
No. of patients	83	27	121
Age 60 years or older	43% (36/83)	48% (13/27)	44% (53/121)	0.803
Stage IV	90% (75/83)	96% (26/27)	96% (116/121)	1
B-symptoms present	63% (52/83)	93% (25/27)	75% (91/121)	0.0678
LDH > UNL	29% (23/80)	30% (8/27)	27% (33/121)	0.8146
Hb < 12 g/dL	12% (10/83)	11% (3/27)	21% (25/120)	0.2921
ECOG 2-4	8% (7/83)	7% (2/27)	10% (12/121)	1
No. FLIPI risk factors
1	15	2	12
2	28	11	43
3	27	7	41
4	9	5	22
5	1	2	2
FLIPI risk group
Low/Intermediate risk	87% (70)	74% (20)	80% (96)
High risk	13% (10)	26% (7)	20% (24)	0.6014

## Sheet: Table S6
Table S6: Changes in gene expression in R1446C cells induced by BRD3308
	FPKM								R1446C BRD4097 vs BRD3308
Gene Symbol	R1446C1-BRD4097-Rep1	R1446C1-BRD4097-Rep2	R1446C2-BRD4097-Rep1	R1446C2-BRD4097-Rep2	R1446C1-BRD3308-Rep1	R1446C1-BRD3308-Rep2	R1446C2-BRD3308-Rep1	R1446C2-BRD3308-Rep2	Fold Change	Q-value
SOX2	0	0	0	0	0.173283	0.097877	0.135027	0.0861606	7.11361	4.45671e-12
ABCD2	0	0	0	0	0.0308558	0.0660835	0.037624	0.0531867	7.03381	8.69143e-12
TPTE2P6	0	0	0	0	0.0485995	0.0405525	0.0422691	0.0171351	6.96325	2.8463e-10
SCN2A	0	0	0	0	0.040594	0.0279448	0.0913812	0.118079	6.67643	1.79657e-07
C20orf54	0	0	0	0	0.0262638	0.0401778	0.00985377	0.0226357	6.34557	8.74088e-07
RGL3	0	0	0	0	0.0379447	0.0417937	0.0256252	0.0490544	6.22084	1.03555e-07
MS4A4A	0	0	0	0.035227	0.636662	0.905773	0.483702	0.802492	6.1279	5.85139e-27
CD300LF	0	0	0	0	0.0212248	0.0909137	0.0238896	0	6.10385	0.00127464
CMKLR1	0	0	0	0	0.00429451	0.0394178	0.00483369	0.0277594	5.97609	0.000490568
TMEM92	0	0	0	0	0.0244739	0.0224637	0.00918222	0.0105465	5.91325	1.56035e-05
PSORS1C1	0	0	0	0	0.00405311	0.0446425	0.00912396	0.0104796	5.88956	0.000605259
FRY	0	0	0	0	0.0515099	0.0420259	0.0257676	0.0591923	5.85526	6.38673e-06
PAGE4	0	0	0	0	1.23469	1.69993	0.694857	1.19715	5.82764	6.826e-06
OR51B5	0	0	0	0	0.0187842	0.0431035	0.0105713	0	5.79882	0.00229938
AFM	0	0	0	0	0.033904	0	0.0599669	0.0375692	5.71265	0.000779049
SPECC1	0	0	0	0	0.0787614	0.0867508	0.05319	0	5.68616	0.00156946
PRICKLE2	0	0	0	0	0.0507448	0.0116442	0.0214185	0	5.66639	0.00286157
ACTN2	0	0	0	0	0.106256	0.0354649	0.0434896	0.0624392	5.61898	0.00010142
SPATA13	0	0	0	0	0.0535516	0.0983063	0.0401834	0.0461539	5.58712	4.90448e-05
LILRA4	0	0	0	0	0.157483	0.19273	0.03939	0.0678638	5.57414	0.000343892
EGF	0.00815387	0	0	0	0.159885	0.258975	0.0952722	0.0486346	5.57301	5.44e-11
KIAA1210	0	0	0	0	0.0477358	0	0.0671614	0.0308561	5.57261	0.00135623
SLFN13	0	0	0	0	0.0414483	0.0304352	0.0186609	0.0107168	5.51945	0.000245031
SOX2-OT	0	0	0	0	0.00895825	0.0219266	0.0403319	0	5.49014	0.00520216
HTR3C	0	0	0	0	0.0525947	0.0160916	0.0591981	0.0679938	5.43008	0.000226127
RYR2	0	0	0	0	0.0181543	0.0166632	0.0153252	0	5.37765	0.00333894
KCNK15	0	0	0	0	0.0156268	0.0163924	0	0.0173161	5.34221	0.00430548
TTLL7	0	0	0	0	0.0126599	0.0348602	0.0142494	0.00818327	5.3078	0.000768982
SUCNR1	0	0	0	0	0.0510157	0.0702383	0.0143552	0	5.28355	0.00844676
PELI2	0	0	0	0	0.0748555	0.0916097	0.0561691	0.0322574	5.24123	0.000410993
C12orf68	0	0	0	0	0.00523974	0.00961875	0.0235904	0.0135477	5.23399	0.00128731
CNTNAP5	0	0	0	0	0.0471217	0.0432514	0.0530379	0.0913776	5.22998	0.000340679
AMIGO2	0.0259355	0	0	0	0.259264	0.62238	0.151519	0.128913	5.17741	1.51929e-14
LRRC36	0	0	0	0	0.0322441	0.177574	0.0725848	0.0416848	5.16166	0.00259311
GSDMC	0	0	0	0	0.0495586	0.0303254	0.00929679	0.0640687	5.12417	0.00236963
PCDHB7	0	0	0	0	0.0691553	0	0.038919	0.0447016	5.1211	0.0042691
RAPGEF4	0	0	0	0	0.036688	0.0134698	0.0330354	0.0474298	5.10685	0.000860921
LOC285626	0	0	0	0	0.0236623	0.0217188	0	0.025492	5.05643	0.00850801
LOC100128076	0	0	0	0	0.00566783	0.0052023	0.0191383	0.0183182	5.03151	0.00298789
LOC221122	0	0	0.0123592	0.00762309	0.117107	0.113811	0.213222	0.227092	4.94353	1.34009e-22
ADAD2	0	0	0	0	0.00394939	0.00725002	0.00222262	0.00255286	4.87404	0.00300286
AZGP1P1	0	0	0	0	0.0103864	0.0190666	0.0116904	0.0402821	4.86157	0.00484743
RAB19	0	0	0	0	0.0139878	0	0.0236159	0.0135624	4.86119	0.00867885
HLA-DPB2	0	0.00742791	0	0	0.0548655	0.0935242	0.08822	0.0455975	4.8505	8.99354e-09
DUSP27	0	0	0	0	0.0117151	0.0215058	0.0395579	0.0151452	4.8365	0.004458
CPXM1	0	0	0	0	0.0173928	0.0159643	0.0195765	0.0112426	4.82008	0.00186667
PADI3	0	0	0	0	0.011461	0.00701309	0.00429997	0.00493887	4.79996	0.00373685
LAMB4	0	0.00962826	0.018228	0.0112429	0.284473	0.289084	0.337342	0.157613	4.66632	1.43872e-24
AKR1C2	0	0	0	0	0.00567955	0.0208522	0.00639262	0.00734245	4.65994	0.00803712
BSPRY	0.19054	0.277705	0.164295	0.202672	4.96327	6.99311	4.6794	5.35099	4.65764	2.19349e-44
LOC100131289	0	0	0	0	0.00294132	0.00809922	0.00331061	0.00570376	4.6265	0.00594869
LONRF3	0	0.0399103	0	0	0.400077	0.257696	0.300205	0.117961	4.61064	1.02287e-13
C4orf19	0	0	0	0	0.00245878	0.00451366	0.00276749	0.00635736	4.6037	0.00648671
LIPN	0	0.00692784	0	0	0.0913783	0.040259	0.0699387	0.00945061	4.58059	8.92195e-05
KIAA1324L	0.0206868	0.0552756	0.0237833	0.023471	0.630991	0.93445	0.662467	0.81231	4.56441	2.58963e-36
RAD51AP2	0	0	0	0.357657	1.9392	2.66988	2.54644	2.08914	4.5105	4.74315e-08
LIPH	0	0	0	0	0.0111313	0.030651	0.0125288	0.0143904	4.48199	0.00964566
SLFN11	0.0338316	0.0246542	0.0116687	0.0215915	0.442257	0.620838	0.614909	0.496072	4.46005	1.52186e-36
C19orf59	0.384153	0.839833	0	0	7.31109	13.0145	4.48855	6.30112	4.43221	1.50911e-13
CTTNBP2NL	0.0557786	0.0762143	0.0288574	0.0177991	1.14198	1.38774	0.669837	0.769362	4.36634	3.0665e-27
PROCR	0.0344981	0.0301678	0.0642521	0.0264202	1.04253	1.32944	0.474745	0.545283	4.3611	3.41812e-21
ABP1	0.0179619	0.0392682	0.00743416	0.0091707	0.522092	0.76065	0.149242	0.18213	4.34482	1.88219e-12
ABCA5	0	0.0038096	0.00360612	0	0.0643183	0.0442767	0.0361968	0.0207875	4.23926	5.12686e-08
ARRB1	0.0198149	0.0216596	0.0410054	0.0252919	0.457104	0.73423	0.450183	0.531845	4.18327	1.48614e-23
HPSE	0.0874356	0.0477878	0.0226177	0.00558019	1.07407	1.43481	0.192973	0.430253	4.15796	1.20187e-08
SLC7A8	0.0668326	0.0365273	0.0864407	0.106632	1.35866	2.1492	0.91104	0.952974	4.12127	9.42218e-23
ALPK2	0	0	0.32859	0	2.01461	3.36207	2.06141	0.473539	4.1191	0.000730447
RBM47	0.0294406	0	0.012185	0.00751567	0.23431	0.193247	0.294305	0.153651	4.02946	3.76574e-22
HSD17B14	0.00543529	0.00594131	0.0112479	0.0138753	0.225694	0.230174	0.0705639	0.129677	4.01756	4.33603e-09
DUSP15	0.0431736	0.0550585	0.100513	0.110215	1.12461	1.20364	0.980881	1.70066	3.9752	4.75901e-27
IGF2BP1	0.573915	0.156836	0.593837	0.183138	10.9226	7.59505	4.09798	2.78133	3.95995	1.93555e-14
KLHL31	0	0	0.00998956	0	0.0779504	0.0204423	0.0626695	0.0431886	3.95338	0.000547099
SNPH	0	0	0.00295459	0	0.016468	0.0181385	0.0148285	0.0127738	3.93866	3.49256e-05
PLCB1	0.0306926	0	0.021172	0	0.271415	0.346606	0.212516	0.137302	3.92803	6.84347e-08
ENAH	0.00615995	0.0117835	0.00637379	0	0.131445	0.0749978	0.121957	0.0642979	3.90779	4.99116e-20
CYP8B1	0	0.274051	0	0	1.73507	2.65427	0.325485	0.747693	3.90476	0.00470532
CD1E	0.0413497	0.0150664	0	0	0.190778	0.466955	0.268412	0.123317	3.88989	1.96412e-05
DYDC2	0.030972	0	0	0	0.392967	0.0655801	0.080419	0.0692758	3.86325	0.00812878
ABCG4	0	0	0.0237192	0.0146299	0.158645	0.206287	0.171123	0.0683646	3.83204	2.36602e-07
TAC3	0.0176513	0.0192946	0.024352	0	0.366474	0.348832	0.213881	0.0438678	3.8222	9.37531e-09
CPS1	0.0326267	0	0.0337592	0	0.150531	0.55267	0.296504	0.194605	3.82103	3.41837e-05
SEPP1	0.0181868	0	0.0150545	0	0.192992	0.13093	0.160556	0.0488147	3.8164	1.59369e-09
HSPA7	0.0647213	0.0141494	0.0602712	0.0495666	0.776382	0.835951	0.588173	0.62731	3.81629	1.6546e-31
PRUNE2	0.144523	0.14218	0.0299081	0.0737885	1.51696	2.29511	1.10701	0.948227	3.81092	2.01353e-20
GPR65	0.0808834	0.076625	0.0334764	0.068827	1.03867	1.11321	0.808555	0.77994	3.79946	1.33033e-29
GABRB2	0	0	0.105167	0	0.625251	0.286948	0.461837	0.303119	3.79407	3.30697e-06
SLC5A9	0	0	0	0.0120352	0.0924433	0.0399296	0.0183617	0.0351499	3.7778	0.0039642
TESC	0.030865	0.0337384	0.0425818	0.0262643	0.302607	0.348552	0.6812	0.582974	3.77079	5.90383e-21
MYO6	0.038602	0.10549	0.149783	0	0.667876	0.81736	1.55357	1.23757	3.77022	3.38932e-14
TRPM6	0.00418584	0	0	0	0.0289687	0.0177262	0.0163029	0.0156043	3.76318	0.000498797
RGS22	0.0277431	0.00758148	0	0.0177058	0.344	0.234973	0.0720352	0.124107	3.72632	1.65948e-06
C6orf192	0.156302	0.142378	0.138624	0.137754	2.15054	2.00148	1.68617	2.03659	3.7262	3.29107e-42
SELL	0.13177	0.156041	0.0681722	0.0560643	1.7922	1.94145	1.01217	0.94151	3.72089	1.05864e-19
FCER2	0.042039	0.1519	0.0374569	0.047697	1.02367	1.53301	0.457844	0.715671	3.69304	7.72974e-14
TCEA3	0.0121085	0	0	0	0.0558657	0.0897351	0.0157199	0.0631947	3.68966	0.00425123
CCBP2	0.148322	0.174931	0.0686582	0.159428	2.02145	2.41329	1.27191	1.61222	3.6847	8.25427e-26
PPP1R14A	0.00284693	0	0	0	0.00985129	0.0120562	0.0147842	0.0254712	3.68375	0.00792019
C6orf218	0.00671292	0	0	0	0.0464577	0.0426419	0.0174302	0.0400399	3.67482	0.00729538
RASAL2	0	0	0.0289932	0	0.25856	0.118661	0.0363778	0.0835657	3.67318	0.00949676
GABBR1	0.129951	0.142049	0.10757	0.0530788	1.69676	2.02517	0.924529	1.0619	3.6489	4.5667e-21
LOC100130301	0.00212808	0	0	0	0.0147276	0.00901199	0.0138139	0.00634657	3.64355	0.0085446
PCYT1B	0.0152091	0.016625	0.0314741	0	0.19297	0.161019	0.296179	0.23813	3.63872	5.21348e-10
SCN4B	0	0.0159429	0.0075457	0	0.100938	0.185295	0.0568055	0.0217486	3.63023	0.00311118
GIMAP6	0.0125952	0.00826065	0	0	0.116222	0.0800071	0.0457848	0.0413188	3.62939	1.1109e-11
LYZ	0.0957486	0.0392485	0.0681122	0.0916609	1.13201	0.963006	0.901218	0.767418	3.62358	4.18302e-30
STX11	0.0420617	0.10345	0.0435218	0.026844	0.794443	0.846085	0.546068	0.603684	3.61671	5.46387e-25
INPP4B	0	0	0.0139548	0	0.0622241	0.0571134	0.0875456	0.0201107	3.60148	0.00498259
IPCEF1	0.00602211	0.00658276	0.0841207	0.0499635	0.152815	0.165766	0.824824	0.69594	3.59907	2.5893e-05
CHRFAM7A	0	0	0	0.0194007	0.0964236	0.0643664	0.0789307	0.0226646	3.59738	0.00514967
PPFIBP1	0.542951	0.811115	0.524346	0.431218	7.04891	8.85227	6.23435	6.54894	3.58676	3.87619e-45
IL17RD	0.178542	0	0.0369479	0.0455785	0.720779	1.96583	0.370868	0.479218	3.58059	1.13369e-07
GSDMA	0.00825991	0.00451445	0.00854664	0	0.0762184	0.0918201	0.0482556	0.0739006	3.5638	5.23107e-12
TSPAN12	0	0	0	0.00740582	0.0267693	0.0368559	0.00753255	0.0302811	3.55738	0.00678872
CFI	0.0137514	0.0150316	0.0142288	0	0.0951685	0.0873518	0.196381	0.164043	3.52143	5.83169e-12
JAKMIP2	0.0233657	0.0425684	0	0	0.282985	0.329831	0.0707808	0.145174	3.52127	1.31879e-08
LOC149773	0	0	0	0.0207514	0.0656327	0.120484	0.0422131	0.0484852	3.51439	0.00467299
RHOBTB3	0.101351	0.295431	0.139825	0	1.87043	1.9314	1.33772	1.43573	3.51424	1.28619e-20
LGALSL	0.0361372	0.0362098	0.00311597	0.023063	0.359508	0.420844	0.230667	0.157168	3.51386	3.50256e-11
ANKRD45	0.0299214	0.0654141	0.185761	0	1.15617	1.39382	0.466147	0.535408	3.51022	3.58808e-11
RHBDL3	0.05795	0	0	0.110952	0.467892	0.981628	0.225702	0.388855	3.45509	0.000331291
RSPO4	0	0.00273217	0.00258624	0	0.00576597	0.0264619	0.0227146	0.0149083	3.44203	0.00100757
GMPR	0.00763951	0.0111343	0.0105396	0.0227527	0.129238	0.207591	0.110751	0.132903	3.43708	5.3011e-23
MOXD1	0.0344041	0.0349208	0.175449	0.0972376	0.694452	0.619202	1.33358	1.12864	3.41926	1.66674e-10
PKIA	0.0819408	0.0597129	0.0565235	0.0348634	0.48832	1.27234	0.46098	0.570202	3.41823	3.29353e-13
MAN1A1	0.45423	0.47493	0.122608	0.151248	4.3167	3.84715	2.52548	2.62095	3.41523	3.06391e-14
SLC22A5	0.0423524	0	0.00398387	0	0.186522	0.179354	0.0949727	0.103343	3.4121	2.07765e-07
LINC00478	0.0104371	0.0570439	0	0	0.270867	0.243095	0.1626	0.0933797	3.40398	2.75984e-07
CALCRL	0.0151994	0	0.015727	0.0194007	0.219145	0.177008	0.0591981	0.135988	3.40022	2.2541e-05
MAP2	0.00760941	0	0.00787356	0	0.0570504	0.0966731	0.0296369	0.0226936	3.39906	0.00133473
NEUROD2	0.00762403	0	0.0157774	0	0.0351754	0.0565009	0.0742344	0.125054	3.39803	0.000119754
BATF	0.0331456	0.0388193	0.0244973	0.00604391	0.314043	0.350912	0.196715	0.289489	3.38876	3.76574e-22
GRP	0	0	0	0.0633351	0.157391	0.157597	0.209362	0.147981	3.38144	0.000656412
LOC285758	0.00995297	0	0.0643654	0.0635204	0.192292	0.194938	0.652535	0.43411	3.37974	3.54786e-05
MPZL2	0.118708	0.055217	0.0287473	0.0451339	1.02838	0.812888	0.472178	0.365323	3.37715	7.66773e-12
PLEKHO1	0.401313	0.524369	0.227901	0.288284	3.59547	5.01149	2.98064	3.83544	3.37325	1.28671e-39
MYBPC1	0.0715956	0.052174	0.0164624	0.0203079	0.523013	0.269505	0.568023	0.391452	3.37255	1.24291e-16
TLR4	0.257613	0.179197	0.31502	0.119571	3.30906	2.57858	2.1435	1.39687	3.36884	1.30388e-17
VAV3	0.0412067	0.0450429	0.156336	0.140258	0.586195	0.901594	1.11452	1.46445	3.36067	3.19574e-13
PREX1	1.34183	4.40025	1.04131	0	16.0576	18.4677	17.4203	21.5093	3.3605	2.88268e-12
NME5	0.508299	0.634996	0.15027	0.556114	6.03043	3.99759	4.80786	4.5477	3.35714	2.15626e-22
WWC3	0.275593	0.45824	0.365487	0.574723	3.36236	5.71213	3.60814	4.94299	3.35296	1.40971e-32
ADAMTS6	1.08261	2.07095	1.12019	1.03639	13.8921	11.7482	12.6495	17.3541	3.33306	4.75901e-27
TRPC3	0	0.0123388	0.0116797	0	0.110669	0.023901	0.0439637	0.100992	3.33145	0.0018718
C4orf26	0.120697	0.131933	0.124886	0	1.43857	1.4056	0.80959	0.479938	3.31588	2.91382e-12
PRAME	0.0482917	0.0527875	0.0199872	0.036984	0.512453	0.388561	0.388708	0.331247	3.30584	7.97608e-24
MECOM	0.0359238	0	0	0.030569	0.207179	0.177485	0.186553	0.124991	3.30568	8.51498e-08
ACSM3	0.20278	0.188074	0.133521	0.0549035	1.72231	1.56133	1.33226	1.21867	3.26581	4.49994e-21
GPR4	0.0484168	0.115649	0.0371092	0.130466	0.442629	1.03277	0.609948	1.19258	3.26321	1.67946e-12
SLAMF1	0.701862	0.88933	0.874435	0.837359	8.58458	8.52852	7.628	7.86858	3.26246	2.51014e-97
NYNRIN	0.0640746	0.0300171	0.0378851	0.0233673	0.559575	0.532996	0.314915	0.163791	3.24621	5.07794e-13
TMOD2	0.300165	0.442235	0.337592	0.283186	3.10094	4.08976	2.92268	3.19152	3.23588	1.10624e-30
AKR1C3	0.0141728	0.00774615	0.00733241	0	0.098085	0.0900288	0.0735998	0.0528346	3.23297	4.70474e-07
RNF43	0.0779174	0.096681	0.0719063	0.0940787	0.740844	0.815994	0.872134	0.832147	3.21986	1.17838e-30
SEZ6L2	0.0107869	0.02653	0.00558067	0	0.0995361	0.159881	0.0700206	0.108573	3.20141	1.66152e-10
BLVRA	0.0328517	0.017955	0.016996	0	0.265247	0.20868	0.0746372	0.159207	3.18842	2.30383e-05
GVINP1	0.0231387	0	0.0239419	0	0.151238	0.195976	0.0500666	0.0920088	3.18006	8.81127e-06
DENND2C	0.0281655	0.0153938	0.0036429	0	0.176649	0.115548	0.0891296	0.0787481	3.17483	4.04806e-11
TFDP2	0.511592	0.33139	0.0784224	0	3.32199	2.06619	2.04173	1.15842	3.17071	0.000113962
RNF180	0.0437591	0.0409997	0.0129366	0.0159585	0.418208	0.26473	0.235358	0.167789	3.16992	8.37748e-12
RPS6KA6	0.00406372	0.00444204	0.00840957	0	0.0796832	0.0516271	0.021103	0.0181788	3.1607	0.000265896
WNT6	0	0.017955	0.00849801	0.0209661	0.0568385	0.10434	0.127949	0.171454	3.15869	0.00038067
ARHGEF25	0.00954607	0.0417392	0	0.0243694	0.176173	0.181916	0.185898	0.142346	3.13815	1.40614e-10
UNC5D	0.0124049	0	0.0256711	0.0316676	0.0572333	0.0262662	0.289885	0.268215	3.13622	0.000947765
SDC3	0.386068	0.316508	0.245828	0.265344	2.99725	4.26023	1.47473	2.20311	3.10954	1.59187e-16
FFAR2	0.0182509	0.0798002	0.037769	0.116478	0.526283	0.59899	0.284332	0.802839	3.1031	2.99817e-13
CHST11	0.0577043	0.0630765	0.0298537	0	0.532467	0.534551	0.131101	0.215115	3.09734	2.76853e-08
GPR162	0.0195332	0.00711723	0.0134742	0.00831079	0.112652	0.172332	0.0972096	0.0776718	3.09625	6.53707e-10
MARCKS	0.16095	0.0914168	0.15021	0.0845923	1.09568	0.895425	1.31928	0.95765	3.08519	2.05731e-23
DNAJC6	0.245988	0.31634	0.0673749	0.203165	1.97778	2.34385	1.39014	1.58589	3.0838	6.37671e-15
TPTE2P1	0.0184274	0.0100715	0.0190671	0.0117605	0.106275	0.165828	0.13756	0.14426	3.08292	1.22478e-09
MAP6	0	0.014368	0.00340014	0.00838876	0.0341125	0.0695794	0.0383954	0.0980006	3.07659	0.000279548
CCL5	0	0.0319054	0.0302013	0.0149024	0.1212	0.0618028	0.242519	0.252438	3.07074	7.44863e-06
HEG1	0.114278	0.104098	0.0197075	0.145866	0.856782	1.17962	0.543994	0.745525	3.06892	5.83169e-12
PLAC8	0.0195591	0.00610859	0.017347	0.00713301	0.167591	0.153826	0.0834333	0.0499982	3.05802	5.65364e-09
RRAS2	0.0436537	0.0286307	0.00903381	0.022288	0.322252	0.166378	0.272033	0.130188	3.05227	3.29099e-12
FNBP1L	0.0291791	0.0239217	0.03774	0	0.307114	0.123568	0.250968	0.108776	3.03541	2.27318e-10
SDC1	0.0230432	0.0705278	0.0190745	0.011765	0.281736	0.487917	0.0777814	0.226782	3.03153	5.49829e-07
CDKN1A	5.561	6.89157	6.02167	6.06642	49.6981	75.1675	31.131	51.8268	3.03108	2.42538e-46
SDC4	0.0492739	0.0552786	0.0429342	0.0595836	0.60424	0.406348	0.395604	0.320969	3.02574	8.87776e-21
C3AR1	0.0996025	0.0884612	0.0386475	0.0476752	0.718034	0.738145	0.39601	0.501263	3.01925	5.23845e-18
MUC12	0.0384463	0.0840511	0.0298356	0.0245366	0.487799	0.508788	0.21213	0.329643	3.01434	2.91188e-10
UACA	0.405749	0.354819	0.2519	0.10358	3.22924	3.35062	1.84368	1.02856	3.00339	1.0361e-10
PLB1	0.0128604	0.0210865	0.0133068	0	0.133503	0.136153	0.0667843	0.0958839	2.99491	3.46326e-05
SERPINA1	0	0.041924	0	0.0489547	0.132715	0.365443	0.124481	0.142977	2.98379	0.00126014
TNNT1	8.78978	8.21336	4.84083	5.06681	70.3151	68.7424	38.8355	42.0688	2.979	1.51077e-17
HDAC11	0.00810118	0.0177108	0	0.0206809	0.121475	0.0857672	0.0946565	0.0724804	2.97629	2.15549e-06
SLC2A3	0.41019	0.455609	0.198523	0.320898	3.34624	3.26401	2.16018	2.37263	2.96568	6.26966e-23
PRKCQ	0.0110368	0.0241287	0.0570997	0.0493063	0.0954772	0.327171	0.300901	0.436125	2.96095	5.72341e-09
HLA-DOA	98.2062	130.887	49.6261	79.3338	701.664	1001.71	469.323	700.091	2.95908	2.01404e-28
IQSEC2	1.03554	1.98091	1.60723	1.32178	12.9895	16.4449	10.7552	8.10678	2.95382	6.41106e-19
LOC257358	0.0172029	0.0611146	0.0267002	0.0878321	0.307559	0.601021	0.212171	0.410434	2.94505	1.18399e-11
LRRC8C	0.0262393	0.025814	0.0135751	0.0200953	0.207318	0.183345	0.129448	0.164333	2.94223	1.43218e-22
SLC9A9	0.0295685	0.024241	0.0178471	0.0125805	0.204633	0.208695	0.156749	0.117576	2.9389	4.67918e-18
GLYATL1	0.0242088	0.0352835	0.0292241	0.0463506	0.276907	0.299016	0.26191	0.213586	2.92797	8.35486e-25
LILRB1	0.00949281	0.0103766	0.0196447	0.0121167	0.114968	0.11055	0.0862686	0.113242	2.92452	1.46591e-07
IL2RA	0.433045	0.378688	0.224039	0.0552743	3.49643	1.74217	2.24881	1.16232	2.92418	8.17225e-10
TRPS1	0.397637	0.289771	0.379791	0.390422	3.06943	2.76335	3.22977	2.28053	2.9186	1.54529e-23
HCP5	0.0263857	0.0480702	0.0182011	0.033679	0.223184	0.37246	0.182695	0.23607	2.91666	1.61124e-15
TSPO	0.0219921	0.0420692	0.0227555	0.028071	0.183907	0.0931322	0.285514	0.327935	2.91439	1.1883e-09
IRF6	0	0.0039215	0.00742408	0.0068687	0.0310348	0.037981	0.0395887	0.0320971	2.86798	6.88162e-06
WDR63	0	0	0.00613499	0.0151361	0.0273557	0.0627721	0.0307903	0.0442064	2.85924	0.00318052
PLEKHA6	0.0241556	0.0264045	0.0124971	0.0308325	0.102161	0.375079	0.0940805	0.162089	2.84913	9.99826e-08
ARHGAP40	0.0178141	0.0389451	0.00921625	0.0341072	0.184927	0.132019	0.161891	0.265635	2.83401	6.29688e-06
PSMB9	0.753121	0.844674	0.54792	0.771037	4.55151	6.38694	4.55262	5.91923	2.83102	7.97387e-38
GPRIN3	0.0482811	0.0487163	0.0845429	0.0474051	0.317001	0.660567	0.253136	0.481809	2.82877	2.05371e-13
PHACTR2	0.00321553	0.00702979	0.00332716	0	0.0111268	0.04766	0.0271348	0.0239742	2.81214	0.00126642
SERPINB6	0.0300346	0.0656616	0.0776931	0.0191683	0.363752	0.286179	0.311941	0.470254	2.80941	2.22792e-13
APOBEC3H	0	0	0.013207	0.016292	0.0441671	0.081079	0.0331416	0.0761316	2.80858	0.00988449
KLF3	0.059044	0.079435	0.00939902	0.0173918	0.434816	0.567398	0.0530683	0.169315	2.7991	5.33013e-05
PMEL	0.489934	0.48686	0.529984	0.511656	3.10167	3.98451	3.03573	4.33358	2.79106	5.13739e-28
SIGLEC14	0.0691186	0.0355545	0.0168278	0.0415171	0.426758	0.533754	0.153075	0.0788154	2.79095	1.51664e-06
LRRC16A	0.14136	0.105526	0.00713499	0.0616115	0.723784	0.861446	0.331234	0.34446	2.78334	1.15531e-05
RIMS4	0.0198259	0.00722387	0	0	0.0457358	0.0979517	0.0428983	0.0295633	2.78071	0.0056701
CLIP2	1.11308	1.37571	0.719827	1.2028	6.47772	10.5522	5.02489	9.18534	2.77535	5.00005e-23
FRMD6	0.0301965	0.0371337	0.00781117	0.00963578	0.261223	0.199806	0.137209	0.0112569	2.76838	0.00015464
DDR1	0.539587	0.503415	0.33428	0.337787	3.22687	3.87148	2.23988	2.74181	2.76631	1.01225e-23
CCL23	0.00526062	0.0143759	0.0108865	0.00335736	0.0576441	0.0556942	0.0478074	0.084327	2.76605	2.25678e-12
DOCK7	0.18118	0.18462	0.101678	0.0979915	1.15824	1.02735	1.03655	0.732654	2.76146	1.3002e-16
AP1S3	0.023791	0.0115582	0.00547042	0.00674825	0.143305	0.0783613	0.0960923	0.0236507	2.76124	1.90111e-05
AHR	0.641811	0.580818	1.22965	1.07203	5.6631	4.831	7.84278	6.10856	2.75642	5.33812e-27
ARGFX	0	0.0284068	0.00672238	0.0165853	0.0824309	0.165077	0.059042	0.0775023	2.75613	0.00193932
SPARC	0.0763887	0.071983	0.0299808	0.0336218	0.62892	0.518701	0.164147	0.168897	2.75281	5.2912e-07
VWA5A	0.310527	0.101831	0.0642614	0.0792722	1.34315	1.01914	0.967545	0.601956	2.739	6.83197e-11
CDK18	0.320161	0.277915	0.142903	0.184296	1.70885	2.06696	1.1247	1.42754	2.72211	1.34799e-16
MYO1D	0.403594	0.376464	0.261699	0.226667	2.39588	2.73463	1.97012	1.55671	2.71995	1.89694e-17
CCDC112	0.110853	0.112517	0.036868	0.0202133	0.611909	0.50297	0.488282	0.318789	2.71614	1.26e-09
LOC283070	0.00680304	0.0148728	0	0.00868348	0.0392344	0.0864286	0.0618246	0.0304331	2.71565	0.00115172
GCA	0.065726	0.0269419	0.0467552	0.0262167	0.440651	0.521881	0.149326	0.0428782	2.70972	2.33874e-05
DOCK9	0.357851	0.490195	0.290594	0.173455	2.5706	2.65679	1.85833	1.74267	2.70175	1.60354e-15
PGCP	1.01351	1.24635	0.786518	0.646827	6.57574	8.31577	5.09869	5.47844	2.68631	4.5285e-14
TBX21	0.00470282	0.00257032	0.00486608	0.00150068	0.0216977	0.0348522	0.0213691	0.0210379	2.68435	6.9798e-06
PLAC1	0.0485504	0.0758148	0.0143531	0.0531174	0.439999	0.440575	0.216106	0.175819	2.66736	6.16732e-09
ZDHHC1	0.0836679	0.082747	0.0329799	0.0254273	0.381427	0.41337	0.351729	0.356461	2.66103	1.89694e-17
ASPHD1	0.207108	0.282987	0.200904	0.385518	1.60751	2.21093	1.3444	1.82081	2.6558	2.12328e-17
MAML2	0.0290103	0.0158556	0.022513	0	0.10875	0.122853	0.141235	0.108147	2.65563	5.38141e-05
PPM1J	0.102133	0.13397	0.073975	0.032591	0.659704	0.648771	0.338117	0.624413	2.65158	6.1877e-13
[truncated: 1,092 more rows]

## Sheet: Table S7
Table S7: Hypergeometric gene set enrichment analysis of differential gene expression induced by BRD3308 in R1446C cells
[truncated: 461 more rows]

[truncated: 6 more sheets: Table S8, Table S9, Table S10, Table S11, Table S12, Table S13]
